# Supplementary material for: Charting differentially methylated regions in cancer with Rocker-meth
Source: Springer Nature journal article supplement (doi:10.1038/s42003-021-02761-3), 2021-11-02
Supplement: MOESM3 [file 42003_2021_2761_MOESM3_ESM.pdf]

## Description of Additional Supplementary Files

**File name:** Supplementary Data 1-11

**Description:**

*Supplementary Data 1:* Characteristics of artificial datasets.

*Supplementary Data 2:* Statistical evaluation of Rocker-meth and other state-of-the-art methods on WGBS artificial datasets.

*Supplementary Data 3:* Statistical evaluation of Rocker-meth and other state-of-the-art methods on RRBS artificial datasets.

*Supplementary Data 4:* Statistical evaluation of Rocker-meth and other state-of-the-art methods on 450K artificial datasets.

*Supplementary Data 5:* Catalog of DMRs across 14 tumor types from 450K data. Coordinates are hg19 based.

*Supplementary Data 6:* Refined catalog of DMRs across 14 TCGA tumor types. Coordinates are hg19 based.

*Supplementary Data 7:* Fraction of DMRs in different genomic features across 13 TCGA datasets.

*Supplementary Data 8:*  $-\log_{10}$  of the p-values of the enrichment analysis (by Fisher Exact Test) of differentially expressed genes and differentially methylated regions across tumor types.

*Supplementary Data 9:* Details about DNA methylation TCGA dataset.

*Supplementary Data 10:* Details about RNA-seq TCGA dataset.

*Supplementary Data 11:* Summary of genomic features by HOMER annotation in the illumina infinium human methylation 450k beadchip.
