# Supplementary material for: Charting differentially methylated regions in cancer with Rocker-meth
Source: Commun Biol. 2021 Nov 2;4:1249. doi: 10.1038/s42003-021-02761-3 (PMC8563962; doi:10.1038/s42003-021-02761-3)
Supplement: Supplementary file 4 — Supplementary Data 1-11 [file 42003_2021_2761_MOESM4_ESM.xlsx]

## Sheet: List
List of Supplementary Data
Supplementary Data 1: Characteristics of artificial datasets.
Supplementary Data 2: Statistical evaluation of Rocker-meth and other state-of-the-art methods on WGBS artificial datasets.
Supplementary Data 3: Statistical evaluation of Rocker-meth and other state-of-the-art methods on RRBS artificial datasets.
Supplementary Data 4: Statistical evaluation of Rocker-meth and other state-of-the-art methods on 450K artificial datasets.
Supplementary Data 5: Catalog of DMRs across 14 tumor types from 450K data. Coordinates are hg19 based.
Supplementary Data 6: Refined catalog of DMRs across 14 TCGA tumor types. Coordinates are hg19 based.
Supplementary Data 7: Fraction of DMRs in different genomic features across 13 TCGA datasets
Supplementary Data 8: -log10 of the p-values of the enrichment analysis (by Fisher Exact Test) of differentially expressed genes and differentially methylated regions across tumor types.
Supplementary Data 9: Details about DNA methylation TCGA dataset.
Supplementary Data 10: Details about RNA-seq TCGA dataset.
Supplementary Data 11: Summary of genomic features by HOMER annotation in the illumina infinium human methylation 450k beadchip

## Sheet: Supplementary Data 1
Supplementary Data 1: Characteristics of artificial datasets.
Characteristics of Background data (see Jühling and Kretzmer et al. (2015) for more details)
	non-promoter		promoter
	alpha	beta	alpha	beta
Background2	15	5	5	15
Class of DMRs
Class	Mixture Factor c	Note	Overlap with hyper-methylation in 14 datasets from TCGA (Background2)	Overlap with hypo-methylation in 14 datasets from TCGA (Background2)
1	1	as in Jühling and Kretzmer et al. (2015)	0.00436856	0.00287028
2	0.87	as in Jühling and Kretzmer et al. (2015)	0.0309997	0.0422079
3	0.73	as in Jühling and Kretzmer et al. (2015)	0.129529	0.196175
4	0.6	as in Jühling and Kretzmer et al. (2015)	0.144019	0.204064
5	0.55		0.0860226	0.124725
4&5			0.169889	0.243002

## Sheet: Supplementary Data 2
Supplementary Data 2: Statistical evaluation of Rocker-meth and other state-of-the-art methods on WGBS artificial datasets.
Class	Method	Specificity	Recall (segment)	Precision (segment)	Recall (site)	Precision (site)	F1 (segment)	F1 (site)	Running time
1	bumphunter	0.999723	1	0.569347	1	0.977509	0.725585	0.988627	18.5829
1	dmrcate	0.99496	1	0.692939	1	0.704704	0.818623	0.826776	1673.84
1	dmrseq	0.995939	0.921	0.987414	0.853482	0.716511	0.953051	0.779022	2967.8
1	dss	0.999962	0.996	1	0.997883	0.996828	0.997996	0.997355	1592.45
1	metilene	0.999998	1	1	0.999377	0.999813	1	0.999595	53.3867
1	rockermeth	0.999755	1	0.980808	1	0.980074	0.990311	0.989937	363.753
2	bumphunter	0.999723	1	0.563396	0.998941	0.977486	0.720734	0.988097	15.2508
2	dmrcate	0.995322	1	0.69637	0.999875	0.719954	0.821012	0.837135	1659.21
2	dmrseq	0.997415	0.866	0.979616	0.782963	0.784625	0.919311	0.783793	2157.68
2	dss	0.999962	0.996	0.996878	0.996731	0.996824	0.996439	0.996777	1619.65
2	metilene	0.999998	1	1	0.999377	0.999813	1	0.999595	53.626
2	rockermeth	0.999756	1	0.980808	1	0.980134	0.990311	0.989967	334.691
3	bumphunter	0.999723	0.937	0.0970112	0.736947	0.969724	0.175819	0.837461	32.8371
3	dmrcate	0.996322	0.997	0.707215	0.988792	0.763768	0.82747	0.861834	1688.25
3	dmrseq	0.999254	0.742	0.98324	0.617329	0.908666	0.845754	0.735187	2220.73
3	dss	0.999973	0.796	0.682382	0.712133	0.996862	0.734825	0.830779	1555.69
3	metilene	0.999985	1	1	0.998755	0.998724	1	0.998739	53.4938
3	rockermeth	0.999753	1	0.977845	0.999907	0.979893	0.988798	0.989799	349.334
4	bumphunter	0.999723	0.009	0	0.0272424	0.542131	0	0.051878	9.74751
4	dmrcate	0.99934	0.319	0.565657	0.278838	0.835604	0.407942	0.418143	1681.12
4	dmrseq	0.999985	0.257	0.891228	0.175317	0.992772	0.398955	0.298007	2109.83
4	dss	1	0.002	0.125	0.00158785	1	0.00393701	0.00317066	1563.98
4	metilene	0.999928	0.545	0.992551	0.534108	0.988875	0.703639	0.693594	53.9927
4	rockermeth	0.999772	0.877	0.925244	0.83172	0.977747	0.900476	0.898841	344.291
5	bumphunter	0.999743	0	0	0.00146331	0.0642077	0	0.0028614	9.73472
5	dmrcate	0.999994	0.016	0.457143	0.0103988	0.954286	0.0309179	0.0205735	1699.17
5	dmrseq	0.999999	0.021	0.724138	0.0143217	0.995671	0.0408163	0.0282373	2004.61
5	dss	0	0	0	0	0	0	0	1571.05
5	metilene	0.99999	0.064	0.939394	0.0622996	0.986686	0.119836	0.117199	51.5837
5	rockermeth	0.999858	0.342	0.760181	0.296024	0.961764	0.471759	0.452708	350.598

## Sheet: Supplementary Data 3
Supplementary Data 3: Statistical evaluation of Rocker-meth and other state-of-the-art methods on RRBS artificial datasets.
Class	Method	Specificity	Recall (segment)	Precision (segment)	Recall (site)	Precision (site)	F1 (segment)	F1 (site)	Running time
1	bumphunter	0.999809	1	0.94086	1	0.998186	0.969529	0.999092	0.790099
1	dmrcate	0.96089	1	0.883436	1	0.729007	0.938111	0.843266	48.4438
1	dmrseq	0.974959	0.955	0.914286	0.861555	0.783543	0.934199	0.820699	115.211
1	dss	0.999503	0.995	1	0.997093	0.995285	0.997494	0.996188	34.0393
1	metilene	0.999828	1	1	0.998183	0.998365	1	0.998274	1.28837
1	rockermeth	0.997458	1	0.988439	1	0.976406	0.994186	0.988062	9.23671
2	bumphunter	0.999809	1	0.925926	0.999455	0.998185	0.961538	0.99882	0.248477
2	dmrcate	0.963662	1	0.878049	1	0.743282	0.935065	0.852738	44.9166
2	dmrseq	0.978839	0.945	0.923977	0.839935	0.806806	0.93437	0.823037	105.234
2	dss	0.999503	0.995	1	0.995276	0.995276	0.997494	0.995276	33.8967
2	metilene	0.999866	1	1	0.99891	0.998728	1	0.998819	1.39758
2	rockermeth	0.997496	1	0.988439	1	0.976752	0.994186	0.98824	9.16829
3	bumphunter	0.999809	0.94	0.12206	0.741461	0.997556	0.216065	0.850651	1.08263
3	dmrcate	0.970314	1	0.878049	0.998728	0.779716	0.935065	0.875737	51.3832
3	dmrseq	0.988282	0.875	0.947712	0.743641	0.869741	0.909906	0.801763	121.396
3	dss	0.999541	0.825	0.895706	0.755814	0.994264	0.8589	0.858794	33.7225
3	metilene	0.999885	1	1	0.997638	0.998908	1	0.998273	1.46938
3	rockermeth	0.997611	1	0.988439	0.999818	0.97779	0.994186	0.988681	9.28863
4	bumphunter	0.999809	0.015	0	0.0288881	0.940828	0	0.056055	0.210897
4	dmrcate	0.992851	0.645	0.823529	0.565952	0.892806	0.723413	0.692761	46.9658
4	dmrseq	0.99849	0.23	0.709091	0.17351	0.923598	0.347338	0.292138	114.839
4	dss	1	0.005	1	0.00472384	1	0.00995025	0.00940325	33.2726
4	metilene	0.999465	0.535	0.98	0.538881	0.990648	0.692145	0.698047	1.39819
4	rockermeth	0.998777	0.86	0.993289	0.821584	0.986044	0.921851	0.896333	9.22453
5	bumphunter	0.999732	0	0	0.00236192	0.481481	0	0.00470078	0.217665
5	dmrcate	0.999924	0.05	0.666667	0.0314317	0.977401	0.0930233	0.0609048	41.1192
5	dmrseq	0.999044	0.03	0.4	0.019077	0.677419	0.055814	0.037109	125.019
5	dss	0	0	0	0	0	0	0	33.7285
5	metilene	0.999943	0.075	1	0.0594113	0.990909	0.139535	0.112101	1.33448
5	rockermeth	0.999293	0.315	0.869565	0.268895	0.97561	0.46247	0.421592	9.3397

## Sheet: Supplementary Data 4
Supplementary Data 4: Statistical evaluation of Rocker-meth and other state-of-the-art methods on 450k artificial datasets.
Class	Method	Specificity	Recall (segment)	Precision (segment)	Recall (site)	Precision (site)	F1 (segment)	F1 (site)	Running time
1	bumphunter	0.999744	1	0.924051	1	0.992053	0.960526	0.996011	0.811414
1	dmrcate	0.997826	1	0.971429	1	0.93625	0.985507	0.967076	21.4833
1	metilene	0.996718	0.9375	1	0.947931	0.90216	0.967742	0.924479	0.760321
1	rockermeth	0.99723	1	0.960526	1	0.920147	0.979866	0.958413	6.32299
2	bumphunter	0.999744	1	0.924051	1	0.992053	0.960526	0.996011	0.237471
2	dmrcate	0.997954	1	0.971429	0.998665	0.939698	0.985507	0.968285	21.1735
2	metilene	0.996761	0.9375	1	0.946595	0.903185	0.967742	0.924381	0.709985
2	rockermeth	0.99723	1	0.960526	1	0.920147	0.979866	0.958413	6.20377
3	bumphunter	0.999744	0.925	0.443038	0.722296	0.989031	0.599121	0.834877	0.139791
3	dmrcate	0.998849	0.975	0.970588	0.926569	0.962552	0.972789	0.944218	21.6097
3	metilene	0.997059	0.925	1	0.93992	0.910737	0.961039	0.925099	0.720007
3	rockermeth	0.9974	0.9875	0.96	0.993324	0.924224	0.973556	0.957529	5.83258
4	bumphunter	0.999744	0	0	0.0280374	0.777778	0	0.0541237	0.668219
4	dmrcate	1	0.05	0.8	0.0253672	1	0.0941176	0.0494792	21.4306
4	metilene	0.998934	0.3875	1	0.387183	0.920635	0.558559	0.545113	0.773114
4	rockermeth	0.998039	0.7625	0.931034	0.723632	0.921769	0.838381	0.81077	5.51827
5	bumphunter	0.999744	0	0	0	0	0	0	0.117926
5	dmrcate	0	0	0	0	0	0	0	0.117926
5	metilene	0.99983	0.0375	1	0.0373832	0.875	0.0722892	0.0717029	0.755089
5	rockermeth	0.998636	0.15	0.666667	0.132176	0.755725	0.244898	0.225	5.99542

## Sheet: Supplementary Data 5
Supplementary Data 5: Catalog of DMRs across 14 tumor types from 450K data. Coordinates are hg19 based.
Tumor Type	DMR type	Chromosome	Start	End	Number of CpG sites	Beta difference (Tumor vs Normal)	Beta Tumor	Beta Normal	P-value	FDR
BLCA	Hypo	chr1	779995	876993	96	-13.101348195022345	37.36541767799353	50.46676587301587	2.1302835337974117e-4	0.0014528457754561315
BLCA	Hypo	chr1	942161	946099	15	-24.75846817691478	51.73042071197411	76.4888888888889	1.075313736320694e-4	8.248050029714706e-4
BLCA	Hyper	chr1	967561	970294	10	17.500242718446604	66.8002427184466	49.3	0.0025980211738725672	0.010015142580590873
BLCA	Hypo	chr1	1098001	1101462	19	-22.11797698128817	32.398313745528874	54.51629072681704	1.62256534070627e-7	3.765570583443366e-6
BLCA	Hypo	chr1	1216347	1228011	19	-16.582822347129962	44.32945835462442	60.91228070175438	0.0018852969206018487	0.007930891718771494
BLCA	Hypo	chr1	1266178	1269219	18	-21.144834848718343	46.312837108953616	67.45767195767196	1.7192360757420333e-5	1.850294578281018e-4
BLCA	Hypo	chr1	1355235	1358109	9	-21.603970822417423	44.37486515641856	65.97883597883597	2.4681201151789385e-4	0.001646561039350413
BLCA	Hyper	chr1	1564422	1567131	15	18.037139775003855	63.5831715210356	45.546031746031744	0.0021330923805383166	0.008674053660913698
BLCA	Hypo	chr1	1851347	1932335	84	-14.774560795191864	55.7373439667129	70.51190476190476	2.927334075568999e-6	4.266659113572187e-5
BLCA	Hypo	chr1	1953059	1987129	55	-12.021611398310428	46.76540158870256	58.787012987012986	0.007609236932254594	0.022932603783226528
BLCA	Hyper	chr1	2002722	2006656	22	11.925850039927708	80.52758164165931	68.6017316017316	0.0011958970154860317	0.005515975866485302
BLCA	Hypo	chr1	2253813	2284821	53	-12.73638334249252	62.502610368199306	75.23899371069183	6.108114373720322e-5	5.302087199556796e-4
BLCA	Hypo	chr1	2287741	2316653	20	-15.657189089227924	62.94757281553398	78.6047619047619	4.667088068935532e-4	0.0027450082938889077
BLCA	Hypo	chr1	2343349	2360074	38	-11.449798647103194	28.171755237608586	39.62155388471178	0.019594952745535184	0.04697386541630177
BLCA	Hypo	chr1	2521842	2559893	29	-15.102706968291168	53.064780716437895	68.16748768472907	0.00256086266397637	0.00992691038740992
BLCA	Hypo	chr1	2561122	2572713	11	-17.443428739545244	45.56090026478376	63.00432900432901	0.009615384615384616	0.027240623131034092
BLCA	Hypo	chr1	2706960	2928403	170	-19.976782654809497	46.412292975442604	66.3890756302521	7.736029239214277e-20	2.0412446806368157e-17
BLCA	Hypo	chr1	2930315	2979311	33	-21.746108799506857	46.23080317740512	67.97691197691198	2.8139355147333833e-6	4.140814338219202e-5
BLCA	Hyper	chr1	2979582	2980937	9	14.066599886988238	53.135382955771306	39.06878306878307	0.019991772932949403	0.04740711977198525
BLCA	Hyper	chr1	2983926	2984869	11	18.54601143193376	42.47241835834069	23.926406926406926	9.299266265210538e-4	0.004696992715425895
BLCA	Hypo	chr1	2992414	3056152	95	-17.058108864393994	58.01507409299949	75.07318295739348	3.504265244954081e-13	3.117981122603329e-11
BLCA	Hypo	chr1	3057810	3099917	67	-14.952039386976352	54.15599188523402	69.10803127221038	7.1680252621018584e-6	8.90417683532523e-5
BLCA	Hypo	chr1	3101428	3155965	90	-19.445257358606874	55.06426645091694	74.50952380952381	4.848969985482956e-15	5.889574337923107e-13
BLCA	Hypo	chr1	3157904	3163710	24	-15.565919247958082	55.16423948220065	70.73015873015873	8.616576820113308e-5	6.947739286354798e-4
BLCA	Hypo	chr1	3165391	3199650	38	-17.98300666715332	54.105965763924374	72.08897243107769	2.91641749437048e-6	4.258860050939487e-5
BLCA	Hypo	chr1	3200671	3223973	23	-22.813327906088567	50.41441536513297	73.22774327122153	1.6457291242083264e-5	1.7990170369203018e-4
BLCA	Hypo	chr1	3241867	3277000	30	-14.897665279704114	49.03090614886732	63.92857142857143	6.848491211822657e-4	0.00370350916981392
BLCA	Hypo	chr1	3283488	3307070	23	-18.840052061347965	50.9570493879274	69.79710144927536	5.825120619431057e-4	0.0032219707075198407
BLCA	Hypo	chr1	3314443	3372482	86	-17.222485189605308	51.82679498758185	69.04928017718716	3.2796826679082514e-9	1.1893901315087176e-7
BLCA	Hypo	chr1	3398886	3525092	114	-14.04314183517045	56.21750979390223	70.26065162907268	1.615803581908874e-7	3.765570583443366e-6
BLCA	Hyper	chr1	3567163	3568245	21	28.336233846289325	45.801086453999076	17.46485260770975	8.371452075249272e-9	2.6146265828492825e-7
BLCA	Hypo	chr1	3605087	3615762	26	-19.44405473167609	49.413088125466764	68.85714285714286	8.797783986944829e-6	1.0685816360016163e-4
BLCA	Hypo	chr1	3817804	4712764	97	-19.579023502104274	49.44404964468021	69.02307314678448	2.011037791359946e-11	1.3739697481684202e-9
BLCA	Hyper	chr1	4714008	4718573	16	17.39632454923717	33.057038834951456	15.660714285714285	5.298891883663016e-4	0.003028164353531695
BLCA	Hypo	chr1	4722690	4770935	14	-24.629243444950795	51.88436199722608	76.51360544217687	1.0638987351869301e-4	8.206605969405635e-4
BLCA	Hypo	chr1	4772257	5907446	106	-23.3036466647476	49.433550100751056	72.73719676549865	2.5454191550719377e-16	3.541372249929176e-14
BLCA	Hypo	chr1	6085995	6238616	112	-15.89457123868965	50.678983183079055	66.5735544217687	2.7823662900140066e-8	7.714009728691008e-7
BLCA	Hyper	chr1	6268790	6269635	6	15.85500462320851	56.78357605177994	40.92857142857143	0.004329004329004329	0.014748682602645202
BLCA	Hyper	chr1	6514605	6522605	19	14.02316470788622	53.321410321921306	39.29824561403509	0.014780729320797999	0.03780151763460772
BLCA	Hyper	chr1	6526049	6526398	6	23.539798119895206	60.047734627831716	36.507936507936506	0.0021645021645021645	0.00869436774948586
BLCA	Hypo	chr1	7024757	7123346	27	-24.37820842108868	52.2690578928443	76.64726631393297	4.890684812072926e-7	9.645237160304648e-6
BLCA	Hypo	chr1	7178026	7739043	99	-18.605674171208154	48.930641365107384	67.53631553631554	1.2855451805499936e-10	7.2330821482121706e-9
BLCA	Hyper	chr1	8013974	8014650	6	20.609762675296658	29.387540453074433	8.777777777777779	0.0010822510822510823	0.005118285093563215
BLCA	Hypo	chr1	8384440	8393978	21	-9.242024965325935	79.85321312991216	89.0952380952381	0.007863446929417484	0.023604235558624433
BLCA	Hypo	chr1	9004961	9078354	20	-10.94873439667129	64.02269417475728	74.97142857142858	0.005157018766343136	0.017054697240480313
BLCA	Hyper	chr1	9377984	9386821	9	10.56638156880875	72.58225458468176	62.01587301587302	0.019991772932949403	0.04740711977198525
BLCA	Hyper	chr1	10728270	10745727	24	10.207442402527354	80.18760113268608	69.98015873015873	0.001177091442112111	0.005432511287721274
BLCA	Hypo	chr1	11562925	11702744	18	-20.387245081419838	56.08629989212513	76.47354497354497	1.7192360757420333e-5	1.850294578281018e-4
BLCA	Hypo	chr1	12678355	13838127	58	-19.863826581854703	47.946518245731504	67.8103448275862	2.708435117040904e-7	5.8053068671140044e-6
BLCA	Hypo	chr1	14113172	14138866	7	-8.73693943596856	79.88210818307905	88.61904761904762	0.01893939393939394	0.0457066423039958
BLCA	Hypo	chr1	14279855	14924535	26	-12.976679469397917	51.387789395070946	64.36446886446886	0.016864882359841592	0.04196839999083839
BLCA	Hyper	chr1	16553267	16554984	10	28.061419325011556	60.3995145631068	32.338095238095235	0.0025980211738725672	0.010015142580590873
BLCA	Hypo	chr1	17046420	17051392	9	-11.862562284892382	63.35436893203884	75.21693121693121	0.015734265734265736	0.03967311545959254
BLCA	Hyper	chr1	17085860	17086558	6	27.207312374788103	55.17556634304207	27.96825396825397	0.0010822510822510823	0.005118285093563215
BLCA	Hypo	chr1	17846708	17848742	7	-18.81285912423222	33.71775312066574	52.53061224489796	0.01893939393939394	0.0457066423039958
BLCA	Hypo	chr1	18060276	18433572	30	-15.155809832023424	43.8616504854369	59.01746031746032	0.003979063063172618	0.013954074500181886
BLCA	Hypo	chr1	18493481	18693462	27	-14.609587164603347	51.78371089536138	66.39329805996474	0.0057710243097333965	0.01845377267784369
BLCA	Hypo	chr1	18700891	18954525	30	-14.699479889042996	42.84813915857605	57.54761904761905	0.011234761701783688	0.031159259348332285
BLCA	Hyper	chr1	18956762	18959625	17	28.383610725843734	44.52926898914906	16.14565826330532	2.9996491867423973e-9	1.1196739305830646e-7
BLCA	Hypo	chr1	19125216	19202030	20	-15.886708275543228	59.67281553398058	75.55952380952381	0.004891524833273809	0.016373555566146624
BLCA	Hyper	chr1	19727557	19794335	17	10.996532593619973	76.27384351798972	65.27731092436974	0.014335000786893686	0.036785964697781066
BLCA	Hypo	chr1	22899442	22987905	57	-13.355891752033806	47.29156021120763	60.64745196324144	1.3128872518981528e-4	9.820345309408274e-4
BLCA	Hyper	chr1	25255838	25258679	30	20.59811604253352	48.35525889967637	27.757142857142856	1.3855744000158948e-5	1.5500607176786003e-4
BLCA	Hypo	chr1	27175203	27194335	24	-17.115796925566343	32.13420307443366	49.25	0.005308081761489353	0.017298740050645883
BLCA	Hyper	chr1	29585853	29610375	12	20.385970488519032	63.62803398058252	43.242063492063494	7.163048285675827e-4	0.0038207282218326605
BLCA	Hypo	chr1	33941835	34522918	38	-21.09989476117478	50.59434082779765	71.69423558897243	2.8408709232836082e-05	2.763856151774832e-4
BLCA	Hyper	chr1	34642345	34643106	8	19.862748497457233	41.98179611650485	22.11904761904762	0.014063714063714063	0.036270825755153356
BLCA	Hypo	chr1	34643941	35220839	15	-18.92147480351364	38.63090614886731	57.55238095238095	0.0037717725244704784	0.013374236958873076
BLCA	Hypo	chr1	35333886	35347799	6	-14.713553706272153	77.2467637540453	91.96031746031746	0.012987012987012988	0.034537751405221286
BLCA	Hyper	chr1	36042433	36056577	11	24.53941285251965	67.62599293909973	43.086580086580085	0.005191145284024541	0.017054697240480313
BLCA	Hypo	chr1	37031079	37495105	29	-14.204381685717475	40.25703046534985	54.46141215106732	0.0155618214982342	0.03956273368076724
BLCA	Hyper	chr1	37498025	37499649	8	12.62676259824318	27.43628640776699	14.80952380952381	7.77000777000777e-5	6.345368138324382e-4
BLCA	Hyper	chr1	40598394	40599011	6	23.184966867005702	72.50242718446601	49.317460317460316	0.020562770562770564	0.04785472029997578
BLCA	Hyper	chr1	41832032	41851836	18	21.737254070991934	42.0044498381877	20.267195767195766	2.9055324387284892e-5	2.814320787487392e-4
BLCA	Hypo	chr1	42618041	42628449	12	-13.348243180767453	54.67556634304207	68.02380952380952	0.01936056943460363	0.046513996016824787
BLCA	Hypo	chr1	43396871	43423072	11	-16.976936493926786	45.94947043248014	62.926406926406926	0.0199877521858946	0.04740711977198525
BLCA	Hyper	chr1	44872657	44874649	9	25.683168952586428	40.07470334412082	14.391534391534393	1.4397367338543808e-4	0.001056267064952418
BLCA	Hyper	chr1	44883137	44887933	11	18.037279872231327	36.911738746690204	18.874458874458874	9.299266265210538e-4	0.004696992715425895
BLCA	Hyper	chr1	45792540	45793300	9	17.498317665793394	27.731121898597628	10.232804232804233	0.0038872891814068283	0.013694998534127555
BLCA	Hyper	chr1	46632363	46633153	8	20.072873324086917	38.3883495145631	18.31547619047619	0.018958818958818957	0.0457066423039958
BLCA	Hyper	chr1	46951291	46952054	6	25.195195715826785	48.226941747572816	23.03174603174603	0.020562770562770564	0.04785472029997578
BLCA	Hyper	chr1	47691550	47701206	22	18.69765792459967	40.17817740511915	21.48051948051948	4.4768507369237145e-4	0.0026535136978265116
BLCA	Hyper	chr1	47909234	47915951	21	22.61591044184664	44.18053629218678	21.564625850340136	9.124511192910511e-7	1.6087732637822863e-5
BLCA	Hypo	chr1	48459236	48460892	7	-15.59342183475332	64.20249653259361	79.79591836734694	0.005536130536130536	0.017836829836829837
BLCA	Hypo	chr1	48470601	48764354	18	-16.64956721631479	60.65466558791802	77.30423280423281	0.001042795472151253	0.005118285093563215
BLCA	Hyper	chr1	50513645	50514460	9	27.249293676478143	51.8101402373247	24.56084656084656	0.0019950637597696418	0.00830589112609211
BLCA	Hyper	chr1	50880864	50893984	61	24.997461024836483	44.02244150883336	19.024980483996877	8.679276984929312e-18	1.6603456872169775e-15
BLCA	Hyper	chr1	51887613	51910707	6	11.859088457389426	83.24797734627832	71.38888888888889	0.012987012987012988	0.034537751405221286
BLCA	Hyper	chr1	53019727	53068834	11	12.299226663304335	36.186672550750224	23.88744588744589	0.0199877521858946	0.04740711977198525
BLCA	Hypo	chr1	53541670	53581841	24	-9.80344621667437	67.57949029126213	77.3829365079365	0.01870785186277772	0.0457066423039958
BLCA	Hypo	chr1	53828495	53932577	37	-9.40093526258575	77.17049330884282	86.57142857142857	9.942729536001646e-4	0.004949678179288615
BLCA	Hypo	chr1	54002750	54200587	30	-13.826783787948836	63.06051779935275	76.8873015873016	0.0034858281847489365	0.012496611282225482
BLCA	Hypo	chr1	55752514	56424393	31	-18.824914619778383	56.51456310679612	75.3394777265745	1.61986505720998e-4	0.0011526007666090492
BLCA	Hypo	chr1	56559819	56900436	15	-18.30486207427955	61.80307443365696	80.10793650793651	3.477750288942216e-4	0.0021600442541384606
BLCA	Hypo	chr1	57176315	57884286	40	-18.33735263522885	58.023361650485434	76.36071428571428	1.6396085944991656e-6	2.6247458085999195e-5
BLCA	Hypo	chr1	57917333	58520532	20	-23.461101479426723	53.19842233009709	76.6595238095238	1.2456062656768756e-5	1.4204737920952984e-4
BLCA	Hyper	chr1	58715499	58716377	10	17.060228848821083	28.874514563106796	11.814285714285715	3.6264045551971246e-4	0.002228855233443245
BLCA	Hypo	chr1	58716662	58920156	10	-13.75217290799815	59.88592233009709	73.63809523809523	0.017731494511680268	0.04366958352216846
BLCA	Hypo	chr1	59040648	59043873	17	-13.820279568137934	15.420616790405482	29.240896358543417	0.005884134984864757	0.018760583710077133
BLCA	Hyper	chr1	60539362	60539675	6	20.037390198797965	51.108818770226534	31.071428571428573	0.012987012987012988	0.034537751405221286
BLCA	Hypo	chr1	61327587	61408076	8	-16.596798428109107	60.355582524271846	76.95238095238095	0.014063714063714063	0.036270825755153356
BLCA	Hyper	chr1	62660188	62660861	8	23.602823046694404	63.13258495145631	39.529761904761905	0.014063714063714063	0.036270825755153356
BLCA	Hyper	chr1	63783977	63790202	27	24.29859077755518	44.601941747572816	20.303350970017636	5.554939250694837e-6	7.253651048859538e-5
BLCA	Hypo	chr1	64242960	64711033	55	-19.13622073719161	59.93477493380406	79.07099567099567	2.418718122050232e-9	9.341756438123016e-8
BLCA	Hyper	chr1	65731107	65731886	6	24.52860610263523	38.64765372168285	14.119047619047619	0.0021645021645021645	0.00869436774948586
BLCA	Hyper	chr1	66257822	66259084	9	18.595867365284843	35.13025889967638	16.534391534391535	0.007095845331139449	0.022000570694440464
BLCA	Hypo	chr1	66278919	66777579	13	-21.75510331092855	57.03976848394324	78.7948717948718	7.749552910409016e-4	0.004083993035154944
BLCA	Hypo	chr1	67001108	67204147	14	-23.49026649494749	54.09136615811373	77.58163265306122	1.343334180862785e-4	9.999215128367735e-4
BLCA	Hyper	chr1	67217769	67218505	12	22.112074279550008	35.00889967637541	12.896825396825397	4.437613806304074e-6	6.020677454935953e-5
BLCA	Hypo	chr1	70210714	70600560	12	-18.176712513484357	69.29550970873787	87.47222222222223	6.753339723000335e-4	0.0036572226157394598
BLCA	Hypo	chr1	70953380	71512100	8	-26.293096971798427	48.03428398058252	74.32738095238095	0.005205905205905206	0.017054697240480313
BLCA	Hypo	chr1	71555947	72382835	8	-24.19251329172446	53.40867718446602	77.60119047619048	1.554001554001554e-4	0.0011152038051129875
BLCA	Hypo	chr1	72753076	74663750	18	-15.080379616787384	51.043959007551244	66.12433862433862	0.004357014820484275	0.014797992634862707
BLCA	Hypo	chr1	74888995	75043066	10	-24.737424872861766	58.01019417475728	82.74761904761905	0.0025980211738725672	0.010015142580590873
BLCA	Hyper	chr1	75590483	75598280	28	16.934193580344758	41.179091539528436	24.244897959183675	5.680829343087832e-6	7.330473209664096e-5
BLCA	Hyper	chr1	75600941	75602925	9	25.09467303642061	42.13700107874865	17.04232804232804	9.255450431921019e-4	0.004696992715425895
BLCA	Hypo	chr1	76543815	77331940	28	-23.737855821940425	51.5750693481276	75.31292517006803	3.7860163892574425e-5	3.518416417812252e-4
BLCA	Hyper	chr1	77332991	77334748	15	17.705100940052397	26.91779935275081	9.212698412698412	6.44672503789385e-9	2.1081341876052879e-7
BLCA	Hypo	chr1	77384892	77547505	8	-20.74984107720758	55.64896844660194	76.39880952380952	0.0034965034965034965	0.012496611282225482
BLCA	Hyper	chr1	79471984	79472643	10	22.09340036985668	57.84101941747573	35.74761904761905	0.002888489291837151	0.010839980412524708
BLCA	Hypo	chr1	79472917	79961576	8	-15.589011211280631	64.90503640776699	80.49404761904762	0.018958818958818957	0.0457066423039958
BLCA	Hypo	chr1	81001617	82208723	35	-16.05933227659996	56.952912621359225	73.01224489795918	2.9421001624192017e-5	2.842544247832289e-4
BLCA	Hypo	chr1	82276730	84419549	30	-15.617706888580674	52.787055016181235	68.40476190476191	0.0013690275479127897	0.006148521346600577
BLCA	Hyper	chr1	91176405	91185922	32	26.127196024040686	45.14654126213592	19.019345238095237	6.17055785818893e-9	2.061882477330205e-7
BLCA	Hyper	chr1	91189314	91190891	10	28.314655570966252	49.71941747572816	21.404761904761905	5.25016778886748e-4	0.0030093096569598467
BLCA	Hyper	chr1	91191990	91307077	39	21.711245065613998	51.410878765247695	29.6996336996337	1.3773294691635574e-8	4.085009727922303e-7
BLCA	Hypo	chr1	92002689	92102055	22	-8.733014962383892	72.70421447484554	81.43722943722943	0.020740654882907585	0.04823935901641606
BLCA	Hypo	chr1	95783866	96939530	16	-26.12977490753583	56.132129854368934	82.26190476190476	1.1379509486243595e-6	1.943660861355714e-5
BLCA	Hypo	chr1	97046756	98383686	30	-10.856087224533825	49.34708737864078	60.2031746031746	0.007123716363316685	0.022078038725030082
BLCA	Hyper	chr1	98510182	98514388	16	17.292367371705964	30.747724514563107	13.455357142857142	3.2343595177503873e-4	0.002033633445343136
BLCA	Hypo	chr1	104096517	105318962	13	-16.07251324727053	70.38536221060492	86.45787545787546	0.003037517066323097	0.011310501504381674
BLCA	Hyper	chr1	110230252	110255096	12	25.530493912775466	60.95509708737864	35.42460317460318	1.1094034515760183e-5	1.2862356380999535e-4
BLCA	Hyper	chr1	110610266	110613397	13	23.59605604751236	51.96601941747573	28.36996336996337	0.002107570717074015	0.008596551773481004
BLCA	Hypo	chr1	110763078	110855257	14	-11.826811307047091	61.860263522884885	73.68707482993197	0.017522496921473903	0.043369714250588075
BLCA	Hyper	chr1	111097901	111098456	6	16.259381260594854	28.34668284789644	12.087301587301587	0.004329004329004329	0.014748682602645202
BLCA	Hyper	chr1	111216661	111218287	14	28.370228188362724	51.28519417475728	22.91496598639456	4.985467362637911e-8	1.3020066982561533e-6
BLCA	Hypo	chr1	111218554	111323224	6	-24.07975034674063	54.06310679611651	78.14285714285714	0.007575757575757576	0.022867730560038255
BLCA	Hypo	chr1	111736753	111744309	11	-13.458874458874458	44.18181818181818	57.64069264069264	0.007884530330350765	0.023604235558624433
BLCA	Hyper	chr1	111813307	111814208	7	25.185770424674725	53.48509015256588	28.299319727891156	0.0011655011655011655	0.00541165953787313
BLCA	Hypo	chr1	112042332	112054997	10	-17.096370781322236	61.96553398058253	79.06190476190476	0.009271688064257724	0.026677061843868304
BLCA	Hypo	chr1	112299263	112528161	23	-13.90667149088424	62.05192064162094	75.95859213250517	0.007323247770686692	0.022521249793977068
BLCA	Hyper	chr1	113285387	113287238	7	17.649775444158248	42.309639389736475	24.65986394557823	0.00874125874125874	0.025413416370863178
BLCA	Hypo	chr1	114525428	114694766	17	-17.90274944929428	58.04683038263849	75.94957983193277	0.0023960786323238377	0.00939282463859734
BLCA	Hyper	chr1	114695261	114697113	11	14.711154541251629	23.767431597528685	9.056277056277056	2.764263600176913e-4	0.0018125231421211429
BLCA	Hyper	chr1	119521928	119543590	72	25.064227282067087	52.479571197411005	27.415343915343914	8.511984741326422e-18	1.6603456872169775e-15
BLCA	Hyper	chr1	119545275	119551319	17	24.063079600772348	44.97344374643061	20.910364145658264	8.320277471710052e-6	1.0186682114164051e-4
BLCA	Hypo	chr1	120439396	120441702	6	-7.891027122823239	83.9502427184466	91.84126984126985	0.0021645021645021645	0.00869436774948586
BLCA	Hypo	chr1	142802299	143651192	15	-12.707481892433348	39.56553398058252	52.27301587301587	0.020419956430453502	0.04785472029997578
BLCA	Hyper	chr1	146543992	146552552	17	21.002665143727395	49.551684751570534	28.54901960784314	1.7427190436611022e-4	0.001230192446687708
BLCA	Hypo	chr1	147143012	147716535	45	-8.811686443725279	58.78090614886732	67.5925925925926	0.007079399880369378	0.022000570694440464
BLCA	Hyper	chr1	147775575	147790806	18	20.236997226074898	60.54652103559871	40.30952380952381	0.001042795472151253	0.005118285093563215
BLCA	Hyper	chr1	147801025	147801789	7	20.746582127996827	71.624133148405	50.87755102040816	0.0020396270396270395	0.008427227919668524
BLCA	Hyper	chr1	149284764	149288143	10	14.337055016181228	53.37038834951456	39.03333333333333	0.0025980211738725672	0.010015142580590873
BLCA	Hyper	chr1	149399174	149400352	7	16.26532263390793	37.91158113730929	21.64625850340136	0.005536130536130536	0.017836829836829837
BLCA	Hyper	chr1	149670340	149673689	8	17.943669093851135	54.65200242718447	36.708333333333336	0.014063714063714063	0.036270825755153356
BLCA	Hypo	chr1	149908313	149909548	6	-11.96852365541686	21.61084142394822	33.57936507936508	0.012987012987012988	0.034537751405221286
BLCA	Hyper	chr1	151811364	151812710	7	29.294993725645597	48.02288488210819	18.727891156462587	0.00058275058275058275	0.0032219707075198407
BLCA	Hypo	chr1	152162507	152553244	50	-14.301232085067037	52.15781553398058	66.45904761904762	1.7547819018605206e-4	0.0012375660012015396
BLCA	Hypo	chr1	152635226	152942404	83	-15.889386951411751	53.787606737630135	69.67699368904188	1.1072400409822526e-7	2.6812027827836063e-6
BLCA	Hypo	chr1	152973720	153030751	19	-13.629662749105776	60.05454777721002	73.6842105263158	0.009753243977123604	0.027600526225203335
BLCA	Hypo	chr1	153112816	153457181	76	-15.986641360683262	50.03027593254982	66.01691729323308	6.361361690844695e-6	8.112856609723934e-5
BLCA	Hypo	chr1	153536528	153591313	32	-14.47040062991216	45.589123179611654	60.05952380952381	0.012780143706732121	0.034537751405221286
BLCA	Hypo	chr1	154679990	154841980	29	-13.11434470004942	51.28138600602611	64.39573070607554	0.007910859363122972	0.023673795794531476
BLCA	Hyper	chr1	155290236	155291345	12	19.084489135460007	50.64401294498382	31.55952380952381	0.0027797952484989773	0.010566812340543554
BLCA	Hypo	chr1	156266750	156270281	6	-13.485513946679	74.42718446601941	87.91269841269842	0.012987012987012988	0.034537751405221286
BLCA	Hypo	chr1	157167737	157938690	49	-27.916119429741382	47.94199524469982	75.85811467444121	7.326709298501945e-11	4.346044926522239e-9
BLCA	Hyper	chr1	158083159	158083569	6	15.025466173524425	21.12864077669903	6.103174603174603	0.0010822510822510823	0.005118285093563215
BLCA	Hypo	chr1	158153227	159140702	79	-30.918463280605348	44.48479169226988	75.40325497287523	8.228540314101456e-18	1.6569681706185355e-15
BLCA	Hypo	chr1	159160407	159820326	71	-23.370071562058435	40.90222890742513	64.27230046948357	4.282456743987403e-9	1.4895163184087092e-7
BLCA	Hypo	chr1	160112673	160147442	12	-13.510199953767914	68.78741909385113	82.29761904761905	0.006046988413390353	0.01919185206937494
BLCA	Hypo	chr1	160385636	160651452	33	-14.853864582019922	56.59635186819653	71.45021645021644	0.0029141415026800754	0.010920181576154719
BLCA	Hypo	chr1	161007634	161009644	14	-15.485403870285978	28.052011095700415	43.53741496598639	0.0031260219524413234	0.011583690062993224
BLCA	Hypo	chr1	161050227	161060000	9	-22.851466584476295	40.825782092772386	63.67724867724868	0.007095845331139449	0.022000570694440464
BLCA	Hyper	chr1	161168856	161171632	11	12.325820619509939	58.50330979699912	46.17748917748918	0.016798217262613546	0.0418317746595474
BLCA	Hyper	chr1	162583287	162602559	9	10.296630194688447	69.98975188781014	59.69312169312169	0.012217194570135747	0.03317458227490374
BLCA	Hypo	chr1	163291487	164287089	26	-14.828621216970733	43.65123226288275	58.47985347985348	0.013939933430149558	0.036270825755153356
BLCA	Hyper	chr1	165204410	165205506	13	13.459271311213058	29.448282300224047	15.989010989010989	0.0036219064284752807	0.012890617670089696
BLCA	Hyper	chr1	165323692	165326345	17	18.143598215985424	39.03155339805825	20.88795518207283	9.949969194031376e-4	0.004949678179288615
BLCA	Hypo	chr1	165907859	166131844	17	-19.86556661499551	61.109223300970875	80.97478991596638	7.606801802233799e-4	0.0040226155764127875
BLCA	Hypo	chr1	166955898	166958322	6	-17.833699337340114	68.95995145631068	86.7936507936508	0.004329004329004329	0.014748682602645202
BLCA	Hyper	chr1	167408509	167409198	7	16.467703586288884	44.447295423023576	27.979591836734695	0.00874125874125874	0.025413416370863178
BLCA	Hyper	chr1	169396635	169396909	9	21.808329480659577	28.617853290183387	6.809523809523809	2.005195223412744e-4	0.0013873195162345674
BLCA	Hyper	chr1	170629502	170631431	10	24.76762598243181	49.56286407766991	24.795238095238094	0.0034207278789322136	0.01247636307416077
BLCA	Hypo	chr1	170646916	171453943	42	-17.841941307267245	51.21474803513638	69.05668934240363	1.9063896818957764e-5	2.023258508441953e-4
BLCA	Hyper	chr1	171810105	171811529	10	22.145688858067498	31.73616504854369	9.59047619047619	6.495052934681418e-5	5.565525762170461e-4
BLCA	Hyper	chr1	172113506	172114419	6	23.12444136230544	74.44983818770227	51.32539682539682	0.0010822510822510823	0.005118285093563215
BLCA	Hyper	chr1	173638690	173639135	6	18.76610417629835	35.34546925566343	16.57936507936508	0.0024990623825412307	0.009726767726961088
BLCA	Hypo	chr1	175013352	175568216	68	-11.906884841315168	44.338913478012564	56.24579831932773	0.003940823488057144	0.013848574793282215
BLCA	Hypo	chr1	175570022	175886537	17	-15.215679475673765	45.140062821245	60.35574229691877	0.01719579064200472	0.04269376703199874
BLCA	Hypo	chr1	176150704	177131972	33	-17.30748889729472	34.54243895263313	51.84992784992785	0.01087088976945978	0.030204810644846126
BLCA	Hyper	chr1	180201891	180207363	17	23.43749150145495	38.93889206167904	15.50140056022409	1.4903971244985798e-6	2.421341570416801e-5
BLCA	Hyper	chr1	181451906	181453051	12	17.500789798119897	32.8539644012945	15.353174603174603	1.1094034515760183e-5	1.2862356380999535e-4
BLCA	Hypo	chr1	181478161	181775743	22	-26.695220232841592	48.81343777581642	75.508658008658	1.4866205696284224e-5	1.6510334686207093e-4
BLCA	Hypo	chr1	185707111	186265765	16	-19.885582813222378	54.79596480582524	74.68154761904762	0.002556672993441027	0.009915692724688667
BLCA	Hypo	chr1	187360078	190068180	12	-18.942566265988596	62.10902103559871	81.0515873015873	0.0027797952484989773	0.010566812340543554
BLCA	Hyper	chr1	197887295	197890812	18	23.909109004982792	42.88794498381877	18.978835978835978	3.7124515377748694e-6	5.260681327232093e-5
BLCA	Hypo	chr1	198651141	198883434	12	-19.006164278008935	62.426375404530745	81.43253968253968	0.0011582172034453634	0.00541165953787313
BLCA	Hypo	chr1	198907517	199552298	10	-21.038118354137772	60.42378640776699	81.46190476190476	0.001439736733854381	0.0063681303395686254
BLCA	Hyper	chr1	200009373	200010788	9	20.723634869265936	39.04638619201726	18.322751322751323	0.002817770464829288	0.010626702610583398
BLCA	Hypo	chr1	200116537	200274728	29	-12.67058443732364	55.807248074991634	68.47783251231527	0.01360750228489414	0.03564690430811707
BLCA	Hypo	chr1	201159147	201437298	76	-11.280052376085845	42.46994762391415	53.75	0.005530308183108845	0.017836829836829837
BLCA	Hypo	chr1	201975041	201987158	18	-19.446056146298865	38.18621898597627	57.63227513227513	0.0077863655652605	0.023429519978518814
BLCA	Hypo	chr1	202996541	203040823	14	-16.937132620038305	48.41660887656033	65.35374149659864	0.00927700752307025	0.026677061843868304
BLCA	Hypo	chr1	203134554	203200291	29	-16.25498190571843	57.01431201874791	73.26929392446634	9.84875239764776e-4	0.004912819644511126
BLCA	Hypo	chr1	204655147	204719449	9	-22.71058714748035	47.305285868392666	70.01587301587301	0.002817770464829288	0.010626702610583398
BLCA	Hypo	chr1	204799888	205060293	76	-15.844602404068423	57.0432422074604	72.88784461152882	8.608307921144335e-8	2.1386614354739106e-6
BLCA	Hypo	chr1	207250784	207455715	16	-18.775969429033747	53.753792475728154	72.52976190476191	0.00848512293006265	0.025136724994517766
BLCA	Hypo	chr1	208431081	209381323	24	-26.463284019109263	44.46925566343042	70.93253968253968	3.5542193065361413e-5	3.358830625096354e-4
BLCA	Hypo	chr1	209405771	209478862	8	-14.045437471104945	71.6926577669903	85.73809523809524	0.018958818958818957	0.0457066423039958
BLCA	Hypo	chr1	209527491	209756976	31	-20.590439652215412	40.64304729094895	61.233486943164365	1.4372710700228674e-4	0.001056267064952418
BLCA	Hypo	chr1	209852361	209876837	6	-14.993315611034058	74.53843042071198	89.53174603174602	0.020562770562770564	0.04785472029997578
BLCA	Hypo	chr1	213498842	214152076	25	-17.24854368932039	59.47145631067961	76.72	2.2237385452843992e-4	0.0015111942583051709
BLCA	Hypo	chr1	214170993	214358938	8	-17.568856911696717	54.97876213592233	72.54761904761905	0.014063714063714063	0.036270825755153356
BLCA	Hypo	chr1	215804508	216707614	19	-22.24869820181522	58.14729177312213	80.39598997493735	1.2960491753353388e-5	1.4670663150393508e-4
BLCA	Hypo	chr1	216939291	217260830	14	-17.158774189287367	62.37864077669903	79.5374149659864	0.002880528260121745	0.01082071784312793
BLCA	Hyper	chr1	217309568	217314284	22	19.307175429748245	53.16648278905561	33.85930735930736	5.173210095002213e-6	6.836857279267173e-5
BLCA	Hypo	chr1	218617769	219345052	17	-24.708493105980256	48.50999428897773	73.21848739495798	1.1505368716406661e-5	1.321908129398555e-4
BLCA	Hypo	chr1	219375142	220099770	27	-18.485150083046523	55.8675836030205	74.35273368606703	1.2565082174991877e-5	1.4286479762709933e-4
BLCA	Hypo	chr1	221101412	221613658	19	-20.928881670194905	50.477133367399084	71.40601503759399	2.0562460612241429e-4	0.0014145114220466674
BLCA	Hypo	chr1	222234397	222721509	40	-11.828548312528895	49.72621359223301	61.554761904761904	0.01950699478548198	0.04679232730360756
BLCA	Hyper	chr1	227746111	227748719	11	17.533444710629176	73.03993821712268	55.506493506493506	0.005191145284024541	0.017054697240480313
BLCA	Hypo	chr1	228466165	228560604	64	-14.712371417013406	66.99893810679612	81.71130952380952	4.651030355115635e-8	1.2272304923222358e-6
BLCA	Hypo	chr1	229265503	229299491	6	-12.218080597934966	69.48826860841424	81.7063492063492	0.0021645021645021645	0.00869436774948586
BLCA	Hyper	chr1	229566769	229569670	13	16.495474590134783	38.195108289768484	21.6996336996337	7.749552910409016e-4	0.004083993035154944
BLCA	Hypo	chr1	230428167	230537434	35	-13.334436298791362	67.16352288488211	80.49795918367347	4.814867377951411e-5	4.2791364896729617e-4
BLCA	Hypo	chr1	230851153	230937455	14	-12.69934284393369	62.8380721220527	75.5374149659864	0.019740830479153267	0.047293937015178714
BLCA	Hyper	chr1	231296640	231297555	7	19.18160953701869	35.76664355062413	16.585034013605444	0.00874125874125874	0.025413416370863178
BLCA	Hypo	chr1	231802460	232534717	28	-16.536094049270194	65.06934812760055	81.60544217687075	2.4787275007718417e-6	3.711785290783979e-5
BLCA	Hypo	chr1	232621926	232684368	12	-9.497303128371087	78.6415857605178	88.13888888888889	0.014210348811237223	0.03653816838158173
BLCA	Hyper	chr1	234040045	234041456	7	22.33186381348656	39.86927877947295	17.537414965986393	0.00874125874125874	0.025413416370863178
BLCA	Hypo	chr1	234350834	234505077	21	-13.878855425665412	50.032709200184925	63.91156462585034	0.007863446929417484	0.023604235558624433
BLCA	Hyper	chr1	235813839	235814462	10	27.179588534442903	51.30339805825243	24.123809523809523	3.6264045551971246e-4	0.002228855233443245
BLCA	Hypo	chr1	236853956	236918537	15	-15.692803205424564	73.89449838187703	89.58730158730158	1.3273806853023437e-5	1.4915002942633677e-4
BLCA	Hypo	chr1	237116052	237201508	9	-16.59318333590178	61.71898597626753	78.31216931216932	0.019991772932949403	0.04740711977198525
BLCA	Hyper	chr1	237205098	237206643	9	25.666512559716445	43.93635382955772	18.26984126984127	0.0019950637597696418	0.00830589112609211
BLCA	Hypo	chr1	237207256	239485905	33	-29.953088443379706	50.09164460135334	80.04473304473305	1.045189492948831e-8	3.186370517945998e-7
BLCA	Hyper	chr1	239549577	239551249	15	14.995238095238095	26.03333333333333	11.038095238095238	1.753509210307127e-6	2.7780232872194897e-5
BLCA	Hypo	chr1	239552128	240159816	25	-20.078603791030975	57.483300970873785	77.56190476190476	7.080986655504871e-5	5.973948168459016e-4
BLCA	Hyper	chr1	240254960	240257185	13	20.478182012162595	34.56609410007468	14.087912087912088	8.978387378203283e-5	7.186466550001205e-4
BLCA	Hypo	chr1	240260050	240774809	38	-23.498187215611846	45.79253960143076	69.29072681704261	7.744861961623176e-7	1.411040088817632e-5
BLCA	Hypo	chr1	240776162	241517815	33	-25.869593998234777	46.82737569873492	72.6969696969697	5.08506918623158e-7	9.926262605368379e-6
BLCA	Hypo	chr1	242222868	242684042	16	-22.98718504392048	45.18841019417476	68.17559523809524	6.19078589471202e-4	0.0033909730612982376
BLCA	Hyper	chr1	243645911	243647204	8	22.709460240406845	67.21541262135922	44.50595238095238	0.005205905205905206	0.017054697240480313
BLCA	Hypo	chr1	243670224	244011194	11	-13.657977136132473	61.64938217122683	75.3073593073593	0.0199877521858946	0.04740711977198525
BLCA	Hypo	chr1	244109212	244208721	8	-20.17154993065187	65.1498786407767	85.32142857142857	5.439005439005439e-4	0.003057991889733256
BLCA	Hypo	chr1	244226143	244534647	28	-14.482584538669839	54.59734743411928	69.07993197278911	0.009348788458671844	0.026748792195723854
BLCA	Hypo	chr1	245494302	245727658	40	-12.501320503929726	69.29629854368932	81.79761904761905	6.988390637811477e-6	8.752072857697778e-5
BLCA	Hypo	chr1	245737866	245744769	6	-10.055189551548777	80.87338187702265	90.92857142857143	0.0010822510822510823	0.005118285093563215
BLCA	Hypo	chr1	245832545	245849662	16	-8.693596856218218	81.77366504854369	90.46726190476191	0.005377764861036308	0.017488591889778932
BLCA	Hypo	chr1	245853938	246036881	19	-8.505359271966322	77.40942769545222	85.91478696741855	0.007069355640231493	0.022000570694440464
BLCA	Hypo	chr1	247542119	247681297	40	-18.06318192325474	47.51419902912622	65.57738095238095	3.125988892919798e-4	0.0019825772935542114
BLCA	Hypo	chr1	247695328	247769251	18	-29.895862228386502	39.73112189859763	69.62698412698413	2.44393050536668e-6	3.6668541621697716e-5
BLCA	Hypo	chr1	247803688	248019234	21	-31.048609735156198	50.067036523347205	81.1156462585034	2.7221153086229987e-8	7.602053409336929e-7
BLCA	Hyper	chr1	248020350	248021163	10	25.82577438742487	37.578155339805825	11.752380952380951	5.412544112234515e-6	7.104080196709864e-5
BLCA	Hypo	chr1	248083146	248099880	7	-22.879416815269796	61.84847434119279	84.72789115646259	0.0011655011655011655	0.00541165953787313
BLCA	Hypo	chr1	248102842	248854887	58	-30.480650278189614	45.86499832607968	76.3456486042693	6.5147395396187884e-15	7.553149538964086e-13
BLCA	Hypo	chr1	248856577	249097923	8	-26.89100785945446	45.84708737864078	72.73809523809524	0.0014763014763014763	0.0064478646670427485
BLCA	Hypo	chr2	68343	212285	14	-18.20635195825903	57.371879334257976	75.578231292517	0.0010387719796792348	0.005118285093563215
BLCA	Hypo	chr2	293814	366113	26	-16.960013691809806	63.75793502613891	80.71794871794872	1.5033508933170236e-4	0.0010903925152286127
BLCA	Hypo	chr2	383369	467799	59	-18.40889536660476	57.29570511765674	75.7046004842615	1.8260595892554765e-7	4.196098491586459e-6
BLCA	Hyper	chr2	467891	469214	8	20.86520457697642	46.32949029126213	25.464285714285715	0.0034965034965034965	0.012496611282225482
BLCA	Hypo	chr2	469727	636122	87	-22.75503106052152	57.38673139158576	80.14176245210729	6.9994431339107734e-15	7.876432185394888e-13
BLCA	Hypo	chr2	708656	736154	11	-17.583049636447694	61.685348631950575	79.26839826839827	0.005208681057370948	0.017054697240480313
BLCA	Hypo	chr2	742127	927755	61	-21.358707926907833	55.339964984879835	76.69867291178767	1.043235561865485e-9	4.587838229537179e-8
BLCA	Hyper	chr2	946010	947589	8	16.55579634766528	36.460558252427184	19.904761904761905	0.0034965034965034965	0.012496611282225482
BLCA	Hypo	chr2	947634	1286216	58	-26.284923159086198	54.004896216940075	80.28981937602627	5.015990237110072e-14	5.117647639248836e-12
BLCA	Hypo	chr2	1286544	1480789	48	-23.914718658498998	55.42258292880259	79.33730158730158	8.351760587469212e-10	3.781519054160616e-8
BLCA	Hypo	chr2	1482185	1593723	62	-25.284459681147748	51.99126996554964	77.27572964669739	9.287693896819385e-14	9.111465858777171e-12
BLCA	Hypo	chr2	1597123	1746253	81	-21.341693635382956	54.942256981901	76.28395061728395	4.840667715119607e-13	4.257561994953475e-11
BLCA	Hyper	chr2	1746509	1749076	15	22.835267375558637	37.27653721682848	14.441269841269841	1.0205165734985965e-5	1.2069540680697466e-4
BLCA	Hypo	chr2	1751169	1880131	72	-19.357300174654544	51.56465749730313	70.92195767195767	1.2606681474698712e-8	3.7682158845466616e-7
BLCA	Hypo	chr2	1887399	2605594	115	-27.37325473878872	50.8226044744618	78.19585921325051	3.850413919119634e-23	1.6368537393946355e-20
BLCA	Hypo	chr2	2633447	3129914	92	-22.712038181671993	55.834028070916	78.54606625258799	1.6418999326468884e-16	2.416118900887306e-14
BLCA	Hypo	chr2	3660907	3688526	20	-13.218440822931115	69.2506067961165	82.46904761904761	0.004741803595602502	0.015935125653733135
BLCA	Hypo	chr2	3704751	3750488	18	-15.639396157600043	65.74420172599784	81.38359788359789	0.001174615986166069	0.005431041771759275
BLCA	Hypo	chr2	3760481	5813258	75	-27.28360147942672	45.57925566343042	72.86285714285714	3.9459168071565775e-15	4.949861542354447e-13
BLCA	Hyper	chr2	5831147	5837429	23	20.64407827293011	38.65650063317855	18.012422360248447	4.354385332935269e-7	8.722449363251486e-6
BLCA	Hypo	chr2	5837929	5885046	15	-23.876837725381414	54.799352750809064	78.67619047619047	0.001153228855128679	0.00541165953787313
BLCA	Hypo	chr2	5944014	6120613	13	-25.358734307763434	39.94529499626587	65.3040293040293	3.140203449800973e-4	0.0019825772935542114
BLCA	Hypo	chr2	6122798	7077912	81	-16.836090135442888	41.41082344480403	58.24691358024691	1.2548066606992353e-4	9.450571424872587e-4
BLCA	Hypo	chr2	7171869	8714248	113	-16.756702629500982	56.992138499871125	73.74884112937211	1.0351997671308826e-9	4.5788142301072334e-8
BLCA	Hypo	chr2	8721512	8787097	21	-10.497842502696873	67.23231622746185	77.73015873015873	0.02034821528508988	0.04785472029997578
BLCA	Hypo	chr2	10615752	10696890	27	-18.339253608671083	47.4438151743977	65.78306878306879	8.952702195764337e-4	0.00463191867491472
BLCA	Hypo	chr2	10953349	11104394	47	-12.79983720404088	41.89418508572609	54.69402228976697	0.008724807774028825	0.025413416370863178
BLCA	Hypo	chr2	11638870	11808487	55	-17.07289118648342	61.6413945278023	78.71428571428571	3.946998600819411e-7	8.01125551550932e-6
BLCA	Hypo	chr2	11863086	11884333	10	-12.322919556171984	65.43422330097087	77.75714285714285	0.004465348892593475	0.015092248112246144
BLCA	Hypo	chr2	11989691	12173618	14	-16.834513902648435	57.60766296809986	74.4421768707483	0.007053962698733193	0.022000570694440464
BLCA	Hypo	chr2	12237012	12824729	23	-16.08096142636033	50.809307724778385	66.89026915113871	0.004019075974377668	0.014062171630515739
BLCA	Hypo	chr2	16420617	16839610	27	-14.810230133045668	46.004584681769146	60.81481481481482	0.015288354805146617	0.038969517311453
BLCA	Hyper	chr2	19550754	19554237	12	20.033624210201882	63.52568770226537	43.492063492063494	5.572903338416867e-4	0.0031193810820436935
BLCA	Hyper	chr2	20865651	20866500	13	26.238699811515346	35.916355489171025	9.677655677655677	1.9200815337576678e-4	0.0013454637267686514
BLCA	Hyper	chr2	20869434	20871401	10	20.28502080443828	70.7135922330097	50.42857142857143	2.4356448505055315e-4	0.0016377464319919442
BLCA	Hypo	chr2	20875062	23607182	72	-17.348073021009913	44.73658306364617	62.08465608465608	5.019365507108903e-5	4.450542857519969e-4
BLCA	Hypo	chr2	23652036	23724231	14	-11.798362063271911	69.37170596393898	81.17006802721089	0.007053962698733193	0.022000570694440464
BLCA	Hyper	chr2	23840268	23843711	7	17.861799088567466	65.92302357836338	48.06122448979592	0.0034965034965034965	0.012496611282225482
BLCA	Hyper	chr2	25496390	25500416	8	15.863355293573743	60.73240291262136	44.86904761904762	9.324009324009324e-4	0.004696992715425895
BLCA	Hyper	chr2	27301195	27301943	6	17.305112498073665	65.28923948220064	47.98412698412699	0.004329004329004329	0.014748682602645202
BLCA	Hypo	chr2	33735888	33755653	6	-23.85775928494375	59.63430420711974	83.4920634920635	0.004329004329004329	0.014748682602645202
BLCA	Hypo	chr2	33827715	36582931	30	-14.009832023424256	51.117152103559874	65.12698412698413	0.009165849344885329	0.026557015973897213
BLCA	Hyper	chr2	38300537	38303504	15	24.828656187394053	50.14611650485437	25.317460317460316	5.933372323126362e-4	0.0032734077156858638
BLCA	Hypo	chr2	40097661	40377776	12	-15.759525735860691	58.926982200647245	74.68650793650794	0.005022269425284637	0.01675257438634614
BLCA	Hypo	chr2	40472772	40590871	6	-19.229638619201726	53.54813915857605	72.77777777777777	0.020562770562770564	0.04785472029997578
BLCA	Hypo	chr2	40783341	42066091	8	-20.959951456310684	50.16504854368932	71125	0.018958818958818957	0.0457066423039958
BLCA	Hypo	chr2	44062010	44126665	27	-9.736742521532166	65.33027687882057	75.06701940035273	0.001562494961397338	0.006762563034283049
BLCA	Hyper	chr2	45155201	45164864	39	27.555137688632833	51.57101070450585	24.015873015873016	1.8494828744059405e-11	1.2865675413594778e-9
BLCA	Hyper	chr2	45169548	45172201	13	22.209049041573312	51.92699775952203	29.71794871794872	0.0050843220583427886	0.016920840346446073
BLCA	Hyper	chr2	45231226	45233773	13	16.571197411003237	61.31478715459298	44.743589743589745	6.241947579947311e-4	0.003411670205839773
BLCA	Hypo	chr2	48773405	50572944	61	-22.14683044951229	48.01476205634251	70.1615925058548	9.70488203048254e-9	2.9710474781793074e-7
BLCA	Hyper	chr2	50573485	50575098	10	18.075970873786407	30.575970873786407	12.5	0.001798943422539816	0.007651759349235504
BLCA	Hypo	chr2	50598121	51255627	26	-26.141861374871084	53.167662434652726	79.30952380952381	5.236730163241884e-7	1.0119055355840125e-5
BLCA	Hypo	chr2	51260399	53731598	31	-24.429977033093227	56.94636705292828	81.3763440860215	2.3253154755875056e-7	5.083804005484455e-6
BLCA	Hypo	chr2	54467214	54483433	9	-10.434889813530587	82.16828478964402	92.6031746031746	0.012217194570135747	0.03317458227490374
BLCA	Hypo	chr2	56210182	56410197	16	-12.64850612575127	61.62530339805825	74.27380952380952	0.00946553754648359	0.02695582184804333
BLCA	Hypo	chr2	58676652	60322100	35	-22.97192721748894	52.89882108183079	75.87074829931973	1.9532577757359275e-6	3.0440587576234863e-5
BLCA	Hypo	chr2	60525511	60679662	12	-13.22689358915087	61.26516990291262	74.4920634920635	0.012092127821028078	0.03296364876612286
BLCA	Hyper	chr2	61371880	61372316	8	28.185852981969486	39.63228155339806	11.446428571428571	7.77000777000777e-5	6.345368138324382e-4
BLCA	Hypo	chr2	62824045	62930083	7	-10.57443365695793	80.6636615811373	91.23809523809524	0.0034965034965034965	0.012496611282225482
BLCA	Hyper	chr2	63274857	63276268	12	20.58244721836955	48.57847896440129	27.996031746031747	7.39602301050679e-7	1.360441540298028e-5
BLCA	Hyper	chr2	63278831	63286355	38	33.55958464121469	61.02950945324476	27.469924812030076	8.077553306974017e-12	6.104762269561645e-10
BLCA	Hyper	chr2	66665428	66689807	27	35.3934650091608	59.84672779575692	24.45326278659612	2.2844110820342794e-10	1.2139106666476601e-8
BLCA	Hyper	chr2	66808261	66811157	14	21.79816392576448	45.83217753120666	24.034013605442176	2.897921547773159e-5	2.814073056289367e-4
BLCA	Hypo	chr2	68624041	68692224	9	-13.322237632917243	76.36030204962243	89.68253968253968	0.015734265734265736	0.03967311545959254
BLCA	Hypo	chr2	69077545	69206176	20	-18.824826629680995	58.09660194174757	76.92142857142856	4.178828911623804e-4	0.002507952849548655
BLCA	Hypo	chr2	69260302	69374392	14	-7.097442375008255	80.73248959778086	87.82993197278911	0.013697770997542165	0.035724384346691423
BLCA	Hypo	chr2	70186726	70251483	14	-9.749521167690377	77.25728155339806	87.00680272108843	0.012062188719881545	0.03296364876612286
BLCA	Hypo	chr2	70781576	70992186	19	-14.12932209163686	60.15137966274911	74.28070175438596	0.005425756788381928	0.017614718262494066
BLCA	Hyper	chr2	71114785	71116765	12	25.51706734473725	44.18770226537217	18.67063492063492	1.6641051773640275e-5	1.8087688660780595e-4
BLCA	Hyper	chr2	71131201	71149811	16	19.935181171983356	62.22982402912621	42.294642857142854	0.007592377119473154	0.0228908076115873
BLCA	Hypo	chr2	71693675	72076889	39	-10.813512808658441	47.74570575056012	58.55921855921856	0.008010864511679656	0.023929965958780018
BLCA	Hypo	chr2	72079413	72368797	23	-11.81647369796378	62.60795694385817	74.42443064182194	0.01799974306363046	0.04430171563940183
BLCA	Hyper	chr2	73147030	73152975	14	18.907610131431213	39.67631761442441	20.768707482993197	1.0638987351869301e-4	8.206605969405635e-4
BLCA	Hyper	chr2	74740238	74747143	20	15.634107720758207	37.40315533980583	21.76904761904762	4.178828911623804e-4	0.002507952849548655
BLCA	Hyper	chr2	74875227	74875548	8	25.03424063800277	59.39138349514563	34.35714285714286	7.77000777000777e-5	6.345368138324382e-4
BLCA	Hypo	chr2	75504008	75786714	16	-20.57213650023116	57.97845873786408	78.55059523809524	7.213960182597206e-4	0.0038414212468499526
BLCA	Hypo	chr2	75979318	79218384	20	-20.723878871937124	54.67135922330097	75.3952380952381	5.576729378248527e-4	0.0031193810820436935
BLCA	Hypo	chr2	79252794	79677079	27	-34.21703823564665	41.90641855447681	76.12345679012346	3.3962535828760315e-11	2.2040460283130383e-9
BLCA	Hypo	chr2	79743491	80527798	22	-30.67139494809398	45.72903795233892	76.4004329004329	1.0397871192008916e-6	1.7919934766047796e-5
BLCA	Hyper	chr2	80529315	80531898	18	12.458506703652334	22.141046386192016	9.682539682539682	2.9055324387284892e-5	2.814320787487392e-4
BLCA	Hypo	chr2	80551413	84521105	51	-26.754593746883867	58.02598515134209	84.78057889822595	1.2846803354491555e-13	1.2136264107230788e-11
BLCA	Hypo	chr2	85890281	85977911	18	-13.262521189705655	52.467637540453076	65.73015873015873	0.01855701666508487	0.045541466171016495
BLCA	Hyper	chr2	87016129	87018104	10	17.85769764216366	32.429126213592234	14.571428571428571	6.495052934681418e-5	5.565525762170461e-4
BLCA	Hypo	chr2	87042671	87087878	9	-12.161748086505368	64.49433656957929	76.65608465608466	0.009378856437679967	0.026748792195723854
BLCA	Hypo	chr2	88382160	88469347	13	-15.436057470038051	55.78005974607916	71.21611721611721	0.009549352921946811	0.027113784251850463
BLCA	Hypo	chr2	91923833	91936436	9	-17.250244002671188	55.05663430420712	72.3068783068783	0.007095845331139449	0.022000570694440464
BLCA	Hypo	chr2	91940103	91995076	6	-17.079788873478197	53.43608414239482	70.51587301587301	0.020562770562770564	0.04785472029997578
BLCA	Hypo	chr2	92028682	92161702	11	-19.796967595511287	56.39783759929391	76.1948051948052	0.0012233638394629107	0.00559879192558026
BLCA	Hypo	chr2	97561669	97564564	6	-14.30954307289259	54.269822006472495	68.57936507936508	0.007575757575757576	0.022867730560038255
BLCA	Hypo	chr2	97652129	97756352	8	-13.559841655108645	73.32706310679612	86.88690476190476	0.0034965034965034965	0.012496611282225482
BLCA	Hypo	chr2	98341557	98357867	27	-14.48207222479067	69.34861560589717	83.83068783068784	7.423997819802958e-5	6.195030677986067e-4
BLCA	Hypo	chr2	98612488	98962564	51	-11.732753619247053	39.464258518941556	51.19701213818861	0.017219426565277206	0.04273411347777235
BLCA	Hyper	chr2	98962900	98964691	11	15.952990375320471	29.372903795233892	13.41991341991342	0.0020512253484389707	0.008443236345484132
BLCA	Hypo	chr2	100158888	100230232	21	-16.753973757787904	50.719949144706426	67.47392290249434	0.0022098750960913116	0.008858022124301056
BLCA	Hypo	chr2	100269094	100718912	31	-27.03691110017449	55.0782962730974	82.11520737327189	1.4124639193166067e-9	5.906105962082336e-8
BLCA	Hypo	chr2	100723110	100760351	9	-18.980839369188885	40.83926645091694	59.82010582010582	0.0013780337309749072	0.006148521346600577
BLCA	Hypo	chr2	101008252	101029771	12	-16.472915703498227	74.29692556634305	90.76984126984127	6.146350083283482e-5	5.320347379783394e-4
BLCA	Hypo	chr2	103756361	105200688	24	-18.832182347048853	46.71146844660194	65.5436507936508	0.0029544142959357644	0.011060263303571658
BLCA	Hyper	chr2	105459097	105461192	9	25.405134329891613	36.72788565264293	11.322751322751323	3.907856849033319e-4	0.002369486577559664
BLCA	Hyper	chr2	105470050	105484823	41	20.341381662776406	38.8524153445418	18.51103368176539	2.429442670133926e-9	9.341756438123016e-8
BLCA	Hypo	chr2	105855151	105877824	20	-13.831588072122054	71.65412621359224	85.48571428571428	3.4546071205161014e-5	3.275669601758266e-4
BLCA	Hypo	chr2	106060221	106360709	24	-13.968109492988134	62.35133495145631	76.31944444444444	0.0020987450133998263	0.008596551773481004
BLCA	Hyper	chr2	106681831	106682640	8	25.40575878409616	44.536711165048544	19.13095238095238	0.0014763014763014763	0.0064478646670427485
BLCA	Hypo	chr2	106869835	107005670	24	-9.81205694251811	68.35659385113269	78.1686507936508	0.0016967686394222024	0.007269694081107891
BLCA	Hypo	chr2	107506849	108442124	9	-18.900151538501056	62.08926645091694	80.98941798941799	0.002817770464829288	0.010626702610583398
BLCA	Hypo	chr2	109791599	110365472	49	-13.197304858142981	62.036903110758864	75.23420796890184	2.6983853195802857e-4	0.0017754122498218697
BLCA	Hyper	chr2	111875749	111877177	9	17.26899368161504	44.872168284789645	27.603174603174605	1.4397367338543808e-4	0.001056267064952418
BLCA	Hypo	chr2	113967479	114030824	20	-10.695053166897825	59.50970873786408	70.20476190476191	0.004355940306513407	0.014797992634862707
BLCA	Hyper	chr2	114033360	114036685	10	19.92645631067961	53.62645631067961	33.7	0.015572785395513713	0.03956273368076724
BLCA	Hyper	chr2	114256392	114261979	15	15.906603482817074	43.93834951456311	28.03174603174603	0.004320904563198277	0.014748682602645202
BLCA	Hypo	chr2	115423582	115612096	8	-30.991013638465095	50.25303398058253	81.24404761904762	1.554001554001554e-4	0.0011152038051129875
BLCA	Hypo	chr2	115972042	118503396	15	-25.759169363538295	48.751941747572815	74.5111111111111	9.428484460269659e-5	7.476359775256322e-4
BLCA	Hyper	chr2	118980919	118982679	11	19.423422855461688	45.388790820829655	25.965367965367964	0.007884530330350765	0.023604235558624433
BLCA	Hypo	chr2	119426116	119528421	6	-22.078652334720296	32.18325242718446	54.26190476190476	0.0021645021645021645	0.00869436774948586
BLCA	Hyper	chr2	119590523	119600948	27	20.304699405832093	37.18653362099964	16.881834215167547	2.623016004015011e-7	5.638010804135635e-6
BLCA	Hyper	chr2	119606055	119612382	28	23.035231325539925	38.37196601941748	15.33673469387755	3.4601723872339673e-9	1.2372541638838468e-7
BLCA	Hyper	chr2	119614489	119617128	12	29.55058560641085	46.530744336569576	16.98015873015873	3.698011505253395e-7	7.620187001931212e-6
BLCA	Hyper	chr2	119914553	119916686	12	19.070937355524734	31.630461165048544	12.559523809523808	7.211122435244121e-5	6.052745161543398e-4
BLCA	Hyper	chr2	121371842	121412432	9	11.934671495351107	69.50080906148867	57.56613756613756	0.012217194570135747	0.03317458227490374
BLCA	Hypo	chr2	121418922	121488902	18	-13.16554297015462	39.48260517799353	52.648148148148145	0.020111292335222814	0.04764446097496129
BLCA	Hypo	chr2	121531017	121625022	34	-16.096091349161025	58.539762992575675	74.63585434173669	1.8341394733538366e-5	1.9574386680758102e-4
BLCA	Hypo	chr2	121627212	121749280	43	-16.494858024492256	63.40658162113344	79.90143964562569	1.3664848963035e-6	2.2830441979289044e-5
BLCA	Hyper	chr2	124782117	124783254	10	19.716527970411466	41.89271844660194	22.176190476190477	3.788780878564161e-5	3.518416417812252e-4
BLCA	Hypo	chr2	124783698	127315703	20	-31.225999768839575	45.678762135922334	76.9047619047619	4.962040073516594e-9	1.6958235930263894e-7
BLCA	Hyper	chr2	127413363	127415590	13	16.4775685479569	37.77427184466019	21.296703296703296	9.568678730073266e-4	0.004798134314713016
BLCA	Hypo	chr2	127426516	127529534	7	-27.664586222838647	58.859223300970875	86.52380952380952	0.0020396270396270395	0.008427227919668524
BLCA	Hypo	chr2	127644612	127780654	20	-18.62706310679612	44.32293689320388	62.95	0.011359363992724733	0.03144784850663157
BLCA	Hypo	chr2	127800616	127817030	11	-12.00656705753793	75.98477493380406	87.991341991342	0.015096188951655199	0.038543889842531064
BLCA	Hypo	chr2	128284637	128382383	28	-13.268732250181628	60.63262829403606	73.90136054421768	0.011200647877634192	0.031087180834115647
BLCA	Hypo	chr2	129335841	129494095	14	-14.066929198864008	62.19157420249653	76.25850340136054	0.0061240234715803435	0.019412190391272902
BLCA	Hypo	chr2	129497875	129659018	12	-18.976932115888424	64.97148058252426	83.9484126984127	1.3719622684490096e-4	0.001015621261087869
BLCA	Hypo	chr2	129698012	130344243	7	-19.898140809721944	55.544036061026354	75.4421768707483	0.013111888111888112	0.034537751405221286
BLCA	Hypo	chr2	130345405	130620543	14	-20.54311141932501	48.8616504854369	69.4047619047619	8.646545320391059e-4	0.004491742348379659
BLCA	Hypo	chr2	130796707	130898542	16	-11.594732431807675	65.04217233009709	76.63690476190476	0.014398488361931087	0.03688422746388355
BLCA	Hypo	chr2	131046313	131090049	6	-19.103887347819384	43.650080906148865	62.75396825396825	0.020562770562770564	0.04785472029997578
BLCA	Hypo	chr2	131266571	131447758	18	-14.978225972158011	59.28896979503776	74.26719576719577	0.004357014820484275	0.014797992634862707
BLCA	Hypo	chr2	131518131	131554018	7	-18.77128327058979	47.93619972260749	66.70748299319727	0.01893939393939394	0.0457066423039958
BLCA	Hypo	chr2	131668683	131673406	7	-16.656347004821345	58.59535367545076	75.25170068027211	0.013111888111888112	0.034537751405221286
BLCA	Hyper	chr2	131673771	131674221	7	17.53166897827092	56.62690707350902	39.095238095238095	0.0020396270396270395	0.008427227919668524
BLCA	Hypo	chr2	131904854	132043874	14	-13.993321114853712	65.73457004160888	79.72789115646259	0.007053962698733193	0.022000570694440464
BLCA	Hypo	chr2	134052012	134368695	31	-14.470780576558841	54.90095521453179	69.37173579109063	0.001046891898088977	0.005118285093563215
BLCA	Hypo	chr2	134548875	134776367	14	-16.183549633445608	60.97971567267684	77.16326530612245	0.003371696504688832	0.012368275001859512
BLCA	Hypo	chr2	137527566	138829973	19	-21.84193493442344	48.77210015329586	70.6140350877193	0.0011108899122150562	0.005240770412003459
BLCA	Hypo	chr2	139541515	142530447	23	-14.312217331001627	63.793372731110175	78.1055900621118	0.0028205153931949384	0.010631814674250083
BLCA	Hypo	chr2	143732362	144271431	15	-16.76123439667129	61.743527508090615	78.5047619047619	0.0049374113252971035	0.016519926305716415
BLCA	Hypo	chr2	144448686	144590694	12	-16.358144552319313	67.19741100323624	83.55555555555556	1.8564017756372045e-4	0.0013044248289417711
BLCA	Hypo	chr2	145310966	145764890	15	-12.279688703960545	67.59967637540453	79.87936507936507	0.008064229993544574	0.024066882960453617
BLCA	Hypo	chr2	145876471	148601396	46	-13.848969326016604	65.5133495145631	79.3623188405797	5.600009928604764e-6	7.30004701425616e-5
BLCA	Hypo	chr2	148976109	149216409	6	-4.497823239328095	88.67677993527508	93.17460317460318	0.0010822510822510823	0.005118285093563215
BLCA	Hypo	chr2	153258890	153283485	7	-14.64368271580477	72.63522884882109	87.27891156462584	0.0034965034965034965	0.012496611282225482
BLCA	Hypo	chr2	153682841	154262055	6	-14.689898289412856	73.0720064724919	87.76190476190476	0.012987012987012988	0.034537751405221286
BLCA	Hypo	chr2	154842584	155445607	7	-20.0410639984149	59.6119972260749	79.65306122448979	0.013111888111888112	0.034537751405221286
BLCA	Hyper	chr2	155555053	155556321	6	20.177781630451534	38.47936893203884	18.3015873015873	0.007575757575757576	0.022867730560038255
BLCA	Hyper	chr2	157176106	157179512	14	30.396027342976023	52.63072122052704	22.23469387755102	6.780235613187559e-6	8.51927141413977e-5
BLCA	Hyper	chr2	162275690	162284894	25	21.928784096162737	49.36116504854369	27.432380952380953	1.5324063063916178e-5	1.6945047769521184e-4
BLCA	Hypo	chr2	162931175	163097510	17	-16.239087868156968	60.31553398058252	76.5546218487395	0.0030299529283908068	0.011298091781409263
BLCA	Hypo	chr2	164331602	166480502	73	-8.42051722936814	44.390311211597286	52.81082844096543	0.01727878491562971	0.04285810767403518
BLCA	Hypo	chr2	166847297	167168604	9	-13.675656238763034	71.2502696871629	84.92592592592592	0.005306458247634718	0.017298740050645883
BLCA	Hypo	chr2	167466236	168139042	12	-25.177126675913087	45.7633495145631	70.94047619047619	0.004146580300840632	0.014455413422338277
BLCA	Hyper	chr2	168149401	168151051	8	18.59048485899214	29.45358009708738	10.863095238095237	5.439005439005439e-4	0.003057991889733256
BLCA	Hypo	chr2	168193427	168811754	18	-18.914913700107874	64.7517529665588	83.66666666666667	3.3120641187575465e-4	0.002065518715300142
BLCA	Hyper	chr2	171674855	171680337	14	26.259510600356645	51.963592233009706	25.70408163265306	2.417951670879387e-6	3.642158697946667e-5
BLCA	Hyper	chr2	172945058	172946691	9	25.80545281758874	63.02238403451996	37.216931216931215	8.227067050596462e-5	6.661747838218427e-4
BLCA	Hyper	chr2	172965280	172966642	7	14.31786209629483	34.134188626907076	19.816326530612244	0.0020396270396270395	0.008427227919668524
BLCA	Hyper	chr2	172972840	172975680	9	19.269096419581857	61.98867313915858	42.71957671957672	0.007095845331139449	0.022000570694440464
BLCA	Hyper	chr2	174878113	174890849	9	15.653580418143527	73.5213052858684	57.86772486772487	0.009378856437679967	0.026748792195723854
BLCA	Hyper	chr2	175190821	175195899	19	15.872965179940142	35.27146142054165	19.398496240601503	1.0789725666158417e-4	8.248050029714706e-4
BLCA	Hyper	chr2	175199576	175204996	19	23.445336642577317	41.59070005109862	18.145363408521302	2.604592245255784e-7	5.614180242449933e-6
BLCA	Hypo	chr2	175595510	175661561	14	-13.487632917244566	63.70284327323162	77.19047619047619	0.0017592717229276658	0.007495516271627227
BLCA	Hyper	chr2	176945526	176950273	22	20.434308410036564	45.642100617828774	25.207792207792206	6.981610776533252e-9	2.2636985450013747e-7
BLCA	Hyper	chr2	176964101	176965435	10	13.925970873786408	62.525970873786406	48.6	0.0025980211738725672	0.010015142580590873
BLCA	Hyper	chr2	176993017	176993841	9	19.15084501977706	44.224919093851135	25.074074074074073	6.170300287947346e-4	0.0033821731950840323
BLCA	Hyper	chr2	177010984	177015125	23	13.899204004100584	66.45821021528072	52.559006211180126	1.572484371000605e-4	0.0011255987284281225
BLCA	Hyper	chr2	177023667	177040226	49	18.432814873522226	56.60288290073311	38.17006802721088	7.393712917066787e-12	5.714817297110611e-10
BLCA	Hypo	chr2	177448447	177466919	6	-19.262501926336878	62.69781553398058	81.96031746031747	0.020562770562770564	0.04785472029997578
BLCA	Hypo	chr2	179396688	179828541	34	-18.581558837127083	69.15933752141633	87.74089635854342	3.224259766434135e-8	8.843023560126882e-7
BLCA	Hypo	chr2	180200208	180722610	13	-19.806536505565635	60.23375653472741	80.04029304029304	3.140203449800973e-4	0.0019825772935542114
BLCA	Hypo	chr2	181010312	181467187	6	-17.294459855139465	63.999190938511326	81.2936507936508	0.012987012987012988	0.034537751405221286
BLCA	Hypo	chr2	181923138	182320901	11	-12.625583154709368	67.81597528684907	80.44155844155844	0.01403253609135962	0.036270825755153356
BLCA	Hyper	chr2	182321354	182322841	13	19.223852199580353	36.19454817027633	16.97069597069597	3.9747706863065593e-4	0.002398654991452507
BLCA	Hyper	chr2	182542510	182550065	26	18.42354368932039	32.654312920089616	14.23076923076923	8.512689279084841e-7	1.5326221635151338e-5
BLCA	Hypo	chr2	183086277	183370084	12	-21.377648713206966	51.225525889967635	72.60317460317461	0.0022565266205056217	0.009007272665680239
BLCA	Hypo	chr2	184126810	185019269	9	-18.50078337699697	48.58387270765911	67.08465608465609	0.009378856437679967	0.026748792195723854
BLCA	Hypo	chr2	189171719	189762162	12	-22.598589921405456	54.782362459546924	77.38095238095238	3.587071160095793e-5	3.359641189357773e-4
BLCA	Hypo	chr2	192734461	192955734	19	-17.293543324330244	60.6087123147675	77.90225563909775	2.716547556224492e-4	0.0017858266237310834
BLCA	Hypo	chr2	193640765	196521354	13	-15.303077989971195	63.136482449589245	78.43956043956044	0.008204334365325078	0.02441834561006126
BLCA	Hyper	chr2	198650752	198651576	8	35.55475612575127	54.53094660194175	18.976190476190478	7.77000777000777e-5	6.345368138324382e-4
BLCA	Hypo	chr2	198673750	200321136	29	-14.35271892486489	53.49949782390358	67.85221674876847	0.006916343520439254	0.02168122106448225
BLCA	Hyper	chr2	200326591	200329680	13	19.72728404281802	46.39395070948469	26.666666666666668	0.0025358152414283793	0.00984477840051241
BLCA	Hyper	chr2	201450323	201451303	14	16.001428241199392	26.494625520110958	10.493197278911564	3.9719218478136235e-4	0.002398654991452507
BLCA	Hypo	chr2	202788592	202842505	11	-17.234554280670782	63.85635481023831	81.0909090909091	0.005191145284024541	0.017054697240480313
BLCA	Hyper	chr2	202900063	202904337	8	16.41626213592233	61.91626213592233	45.5	0.002331002331002331	0.009198983928225806
BLCA	Hypo	chr2	204602302	204737672	8	-14.0289817383264	69.57220873786407	83.60119047619048	0.010334110334110334	0.028891710733142957
BLCA	Hypo	chr2	204800350	205409988	26	-15.959493580852804	62.58812546676624	78.54761904761905	2.1531179965954324e-5	2.2059540637453268e-4
BLCA	Hypo	chr2	205466396	206544411	37	-14.093210755832114	64.44089477827342	78.53410553410554	9.998411665628076e-5	7.855014996446205e-4
BLCA	Hyper	chr2	207506480	207507528	9	13.50696049725176	30.782092772384033	17.275132275132275	9.255450431921019e-4	0.004696992715425895
BLCA	Hypo	chr2	209224225	209240193	9	-13.098641290388862	76.00188781014023	89.1005291005291	0.0038872891814068283	0.013694998534127555
BLCA	Hypo	chr2	209675250	210179077	13	-12.266759130836801	65.18745332337565	77.45421245421245	0.0025358152414283793	0.00984477840051241
BLCA	Hypo	chr2	211346899	212786221	14	-14.055627105211018	63.09743411927878	77.1530612244898	0.017522496921473903	0.043369714250588075
BLCA	Hypo	chr2	216708370	216844602	8	-21.56865464632455	55.14563106796116	76.71428571428572	0.018958818958818957	0.0457066423039958
BLCA	Hypo	chr2	217560946	218269472	67	-17.39547236080347	60.7395667294595	78.13503909026296	3.0944168002484255e-9	1.1494406483252888e-7
BLCA	Hypo	chr2	218316451	218680226	33	-15.04320248252287	48.25838481906443	63.301587301587304	0.005974485600662933	0.019040717957631306
BLCA	Hypo	chr2	218932178	219051445	28	-16.028923948220065	41.24488557558946	57.273809523809526	0.0054140671969715466	0.01759169519797294
BLCA	Hyper	chr2	219735876	219738732	11	17.85385407472786	50.97506619593998	33.121212121212125	7.002801120448179e-4	0.003768314639498556
BLCA	Hyper	chr2	220173591	220197576	12	16.145708121436275	38.48300970873787	22.33730158730159	0.0018183122571330946	0.007704166883489724
BLCA	Hyper	chr2	220299484	220299740	8	18.18364251040222	40.34435679611651	22.160714285714285	0.007381507381507382	0.022521249793977068
BLCA	Hypo	chr2	220419364	220442677	40	-10.60876386962552	58.68052184466019	69.28928571428571	0.0060933460320566095	0.019330963448298995
BLCA	Hypo	chr2	221393426	222237362	20	-14.399953767914932	64.05242718446603	78.45238095238095	0.001942502871070845	0.008120495209889594
BLCA	Hyper	chr2	223151884	223169609	67	21.035809164993342	42.077742356180266	21.04193319118692	2.924310055753837e-14	3.0653178830997757e-12
BLCA	Hyper	chr2	223176167	223177785	14	21.129581929859324	38.231622746185856	17.10204081632653	2.1063599607145172e-4	0.00143909521601674
BLCA	Hypo	chr2	224831785	225129662	41	-11.464395656439228	49.74117925645276	61.20557491289198	0.013706065220112881	0.03573215265471362
BLCA	Hypo	chr2	225543274	225875689	11	-18.22106291766486	57.42828773168579	75.64935064935065	0.0199877521858946	0.04740711977198525
BLCA	Hypo	chr2	228475395	228564308	12	-8.528288257050392	77.65028317152104	86.17857142857143	0.009673486882105108	0.027384950655519158
BLCA	Hyper	chr2	228736089	228736459	9	16.00346740638003	25.432038834951456	9.428571428571429	1.4397367338543808e-4	0.001056267064952418
BLCA	Hypo	chr2	228788883	229041986	8	-17.968475496994913	66.93628640776699	84.9047619047619	0.014063714063714063	0.036270825755153356
BLCA	Hyper	chr2	229045020	229046785	10	18.991030975496997	34.32912621359223	15.338095238095239	0.001943103336292191	0.008120495209889594
BLCA	Hypo	chr2	229379650	230133040	7	-17.729558813816787	55.21601941747573	72.94557823129252	0.01893939393939394	0.0457066423039958
BLCA	Hyper	chr2	233251770	233253378	7	14.330691499900931	65.86130374479889	51.53061224489796	0.0020396270396270395	0.008427227919668524
BLCA	Hypo	chr2	233286870	233323117	13	-16.988104128880828	58.45145631067961	75.43956043956044	0.002107570717074015	0.008596551773481004
BLCA	Hyper	chr2	233350363	233352776	10	15.133830328247804	34.23859223300971	19.104761904761904	0.011615319664855269	0.032017444551683184
BLCA	Hypo	chr2	233831578	233899331	18	-12.230511891919658	70.2245145631068	82.45502645502646	0.012200647520924564	0.03317458227490374
BLCA	Hypo	chr2	234389140	234608369	29	-12.303410014826152	65.89856042852361	78.20197044334975	0.005007446961482054	0.01673230748876012
BLCA	Hypo	chr2	234851397	235080594	22	-16.930835750010505	62.761804942630185	79.6926406926407	9.347004040920293e-4	0.004705478613231716
BLCA	Hypo	chr2	235749867	235859641	10	-13.28371474803514	66.69247572815534	79.97619047619048	0.001943103336292191	0.008120495209889594
BLCA	Hyper	chr2	237076726	237078733	14	22.020812694009642	38.476595006934815	16.45578231292517	2.417951670879387e-6	3.642158697946667e-5
BLCA	Hypo	chr2	237148507	237412439	20	-13.036927877947296	61.29878640776699	74.33571428571429	0.017505330099033246	0.043369714250588075
BLCA	Hypo	chr2	238036564	238116756	8	-21.515690013869627	48.02002427184466	69.53571428571429	0.018958818958818957	0.0457066423039958
BLCA	Hypo	chr2	238249152	238314219	38	-18.967470253303162	64.77689064895247	83.74436090225564	1.6789122461366364e-8	4.866301707362705e-7
BLCA	Hypo	chr2	239006511	239060032	58	-12.097222886476318	63.869936391027785	75.96715927750411	5.126969695989667e-5	4.5262469290099634e-4
BLCA	Hypo	chr2	239437806	239699222	37	-15.191038472591872	58.49750721595382	73.68854568854569	2.3762689544675058e-4	0.0016077108788315963
BLCA	Hypo	chr2	239791753	239971554	58	-17.172631004192773	60.025234348845	77.19786535303777	1.0970177492096722e-7	2.664882481572194e-6
BLCA	Hyper	chr2	240143798	240162323	20	11.556276005547849	69.49199029126214	57.93571428571428	0.004741803595602502	0.015935125653733135
BLCA	Hypo	chr2	240168283	240169280	8	-23.353675450762832	58.182038834951456	81.53571428571429	0.0034965034965034965	0.012496611282225482
BLCA	Hyper	chr2	240224285	240234604	15	14.960826013253197	77.97669902912621	63.01587301587302	0.002723476351634386	0.010388853959474737
BLCA	Hypo	chr2	240323713	240848062	101	-18.05313027835377	58.69085840622897	76.74398868458275	1.2579889821377243e-13	1.2032664614147334e-11
BLCA	Hypo	chr2	241080057	241186121	26	-13.248844197873325	54.483756534727405	67.73260073260073	0.014627635220521424	0.03744752917612243
BLCA	Hypo	chr2	241190395	241265953	24	-16.19669825859146	65.81917475728156	82.01587301587301	3.216783359638416e-4	0.002027580417459074
BLCA	Hypo	chr2	241293101	241366765	12	-17.6526718292495	64.3909789644013	82.0436507936508	0.0018183122571330946	0.007704166883489724
BLCA	Hyper	chr2	241458886	241460002	7	27.215127798692293	64.84778085991678	37.63265306122449	0.0034965034965034965	0.012496611282225482
BLCA	Hypo	chr2	241564827	241587783	24	-13.552059254122362	56.73563915857605	70.28769841269842	0.01085876260025836	0.030189387008599956
BLCA	Hypo	chr2	241615739	241689957	30	-14.533009708737865	61.80032362459547	76.33333333333333	4.447966317903046e-5	4.004216266422836e-4
BLCA	Hypo	chr2	241714550	241757567	19	-16.616656933596126	65.67156361778233	82.28822055137844	3.9300513015268545e-5	3.631974946773368e-4
BLCA	Hypo	chr2	241776193	241900108	49	-12.241468293281251	52.67495541906083	64.91642371234208	0.003617963588728575	0.012890617670089696
BLCA	Hypo	chr2	241937756	242021233	44	-11.820322678939183	50.91885481023831	62.739177489177486	0.005685531591091658	0.018279700729005616
BLCA	Hypo	chr2	242702553	242716801	21	-12.7142086608106	56.77785483125289	69.4920634920635	0.013772887318579065	0.035871386576503406
BLCA	Hypo	chr2	242750036	242802192	72	-16.4441924153696	55.4281620819849	71.8723544973545	1.5914460416945374e-7	3.735504635290368e-6
BLCA	Hypo	chr2	242810917	242819408	19	-15.690384942939872	57.9061062851303	73.59649122807018	0.00452352577999432	0.01527538361364366
BLCA	Hypo	chr2	242832796	242836370	9	-21.84079467817332	53.01105717367853	74.85185185185185	8.227067050596462e-5	6.661747838218427e-4
BLCA	Hypo	chr2	242845232	242988095	93	-14.823170974204485	65.01605073598496	79.83922171018945	1.1045720155852096e-9	4.80237787685115e-8
BLCA	Hypo	chr3	390449	2137559	22	-18.981013323246334	49.23543689320388	68.21645021645021	5.362997717583421e-4	0.003051127028620694
BLCA	Hyper	chr3	2139690	2141686	11	13.192798302021604	26.292365401588704	13.0995670995671	0.003317116320212295	0.01219143807985806
BLCA	Hypo	chr3	2783388	3807867	58	-14.64744846716725	31.983093404753934	46.63054187192118	0.009826421079416128	0.027766534010226072
BLCA	Hyper	chr3	6902337	6905031	14	17.121986658741168	30.618585298196948	13.496598639455783	4.860830678571963e-6	6.502635725949766e-5
BLCA	Hypo	chr3	6906061	8533978	23	-21.75928661882651	57.805930772477836	79.56521739130434	3.145041581900586e-6	4.540727959377978e-5
BLCA	Hyper	chr3	10149803	10150139	9	10.722774438793857	88.87621359223301	78.15343915343915	0.0038872891814068283	0.013694998534127555
BLCA	Hypo	chr3	10362878	10492743	48	-15.90278500154107	53.351183252427184	69.25396825396825	9.722786869939411e-5	7.662076738287989e-4
BLCA	Hypo	chr3	11036746	11267525	45	-16.63312528895053	45.030366774541534	61.663492063492065	0.001240838616210124	0.005655525024458577
BLCA	Hyper	chr3	11623526	11658043	16	16.906856796116504	70.5318567961165	53625	0.0014918254112399173	0.006478687881275737
BLCA	Hyper	chr3	12045449	12046618	8	15.20677300046232	27.730582524271846	12.523809523809524	3.108003108003108e-4	0.001975285696215929
BLCA	Hyper	chr3	13114570	13115406	8	17.817383263985207	39.2876213592233	21.470238095238095	0.0034965034965034965	0.012496611282225482
BLCA	Hypo	chr3	13594970	13612434	11	-15.913283318623124	57.813989408649604	73.72727272727273	0.016798217262613546	0.0418317746595474
BLCA	Hypo	chr3	14555354	14642610	31	-17.204166853086367	50.410272471030375	67.61443932411674	8.805245183953728e-5	7.07006675211059e-4
BLCA	Hypo	chr3	14719326	14849245	8	-17.43888696255201	63.61468446601942	81.05357142857143	0.014063714063714063	0.036270825755153356
BLCA	Hyper	chr3	14851743	14853225	9	11.202817588739919	26.578478964401295	15.375661375661377	0.009378856437679967	0.026748792195723854
BLCA	Hypo	chr3	14855132	14963073	19	-18.883878385283598	50.905595298926926	69.78947368421052	0.0017003576303764919	0.007276922028881944
BLCA	Hypo	chr3	16647343	16852000	11	-17.273336695666792	58.17255075022065	75.44588744588745	0.016798217262613546	0.0418317746595474
BLCA	Hypo	chr3	16957609	17082105	11	-16.257428655486905	67.25772285966461	83.51515151515152	0.004164823824266549	0.014492602047879779
BLCA	Hypo	chr3	19191785	19988132	18	-16.88890173113474	57.79099244875944	74.67989417989418	0.0023140723084458105	0.009193811684437872
BLCA	Hypo	chr3	20321584	21720400	14	-20.297982299716	64.48092926490985	84.77891156462584	5.086306525853637e-4	0.0029462844463158237
BLCA	Hypo	chr3	21832523	22413232	8	-33.71305767452612	41.79884708737864	75.51190476190476	5.439005439005439e-4	0.003057991889733256
BLCA	Hyper	chr3	22413582	22414364	6	15.900408383418092	31.47977346278317	15.579365079365079	0.012987012987012988	0.034537751405221286
BLCA	Hypo	chr3	23305946	23650443	12	-14.31333795654184	73.50809061488673	87.82142857142857	9.1488804639969e-4	0.004696992715425895
BLCA	Hypo	chr3	24887420	25468324	17	-20.064099426178238	62.84066247858367	82.9047619047619	4.4673775338154523e-5	4.016965086810322e-4
BLCA	Hypo	chr3	25832283	26418374	11	-22.150643046274116	60.148058252427184	82.2987012987013	0.005191145284024541	0.017054697240480313
BLCA	Hypo	chr3	26666151	27114861	10	-27.870446139620896	45.33907766990291	73.2095238095238	0.0025980211738725672	0.010015142580590873
BLCA	Hyper	chr3	27764473	27772805	31	22.007963849492192	38.805198872533666	16.797235023041473	1.1901603147290752e-9	5.116352094554429e-8
BLCA	Hyper	chr3	28616682	28618233	7	12.314923056601282	25.872746185852982	13.5578231292517	0.00874125874125874	0.025413416370863178
BLCA	Hypo	chr3	29338542	30341246	30	-22.43827631376175	57.03632686084142	79.47460317460317	2.0576124402434426e-6	3.180777857119762e-5
BLCA	Hypo	chr3	31481371	31569316	11	-9.602645736140879	80.25882612533098	89.86147186147186	0.011653851824130462	0.03203134847638157
BLCA	Hyper	chr3	32858280	32861407	17	16.54953631938212	40.40948029697316	23.859943977591037	0.0030299529283908068	0.011298091781409263
BLCA	Hypo	chr3	32861910	32996372	31	-9.69678090465751	67.97142186031945	77.66820276497695	0.004791968174442367	0.016061384349904947
BLCA	Hypo	chr3	33840670	35680387	22	-22.34025763880133	54.30692850838482	76.64718614718615	2.161942702522686e-5	2.2059540637453268e-4
BLCA	Hypo	chr3	35720528	36418645	27	-24.90843906782418	49.72824523552679	74.63668430335098	7.565977218346737e-7	1.3883658914817561e-05
BLCA	Hypo	chr3	36567667	36803565	10	-14.815961627369395	65.9745145631068	80.79047619047618	0.009271688064257724	0.026677061843868304
BLCA	Hyper	chr3	38035098	38036060	8	21.854051086453996	49.30643203883495	27.452380952380953	0.0034965034965034965	0.012496611282225482
BLCA	Hypo	chr3	38567652	39091102	37	-16.839943271982108	55.842167410128575	72.68211068211068	1.0893005586992948e-4	8.310396685111669e-4
BLCA	Hypo	chr3	39230030	39424819	33	-11.906618193025961	54.51618122977346	66.42279942279943	0.015272782883009066	0.03894279727450362
BLCA	Hypo	chr3	40661229	41239648	20	-12.005732778548312	66.9990291262136	79.0047619047619	0.005288782767202403	0.017296871725189542
BLCA	Hypo	chr3	41281527	41836564	12	-10.52988711665896	76.54550970873787	87.07539682539682	0.014210348811237223	0.03653816838158173
BLCA	Hypo	chr3	42201314	42221102	7	-11.334868899015918	19.937239944521497	31.272108843537417	0.0034965034965034965	0.012496611282225482
BLCA	Hyper	chr3	42306493	42307866	11	18.614424410540913	47.93909973521624	29.324675324675326	0.003317116320212295	0.01219143807985806
BLCA	Hypo	chr3	42730382	42775696	13	-19.50528112664035	43.2419716206124	62.747252747252745	0.01691383189431379	0.042048291635896407
BLCA	Hyper	chr3	44063315	44063832	6	29.172464940668824	45.28357605177993	16.11111111111111	0.0021645021645021645	0.00869436774948586
BLCA	Hypo	chr3	45797767	45834369	6	-18.871339959932193	60.358818770226534	79.23015873015873	0.012987012987012988	0.034537751405221286
BLCA	Hypo	chr3	46249795	46606299	56	-11.810462898751734	43.43953710124827	55.25	0.00554124875236707	0.017845806167135027
BLCA	Hypo	chr3	46768322	46797928	17	-11.488965489108264	75.46901770416905	86.95798319327731	0.0018814356776954428	0.007919002093358378
BLCA	Hyper	chr3	49313334	49314920	13	13.521240086774068	27.297796863330845	13.776556776556777	0.002393746832883067	0.00939282463859734
BLCA	Hyper	chr3	49459855	49460521	9	12.113435557610316	59.55258899676375	47.439153439153436	0.007095845331139449	0.022000570694440464
BLCA	Hyper	chr3	50377836	50378664	13	21.677824602581886	30.94156086631815	9.263736263736265	1.3544905277898856e-4	0.0010052920968620955
BLCA	Hypo	chr3	50492746	50537375	7	-14.994997027937389	69.6376560332871	84.63265306122449	0.0011655011655011655	0.00541165953787313
BLCA	Hypo	chr3	51742513	51910733	34	-11.121291234940578	67.07338663620789	78.19467787114846	0.007971794522425728	0.023828362140957387
BLCA	Hypo	chr3	52812478	52867330	30	-10.322961935583296	62.527831715210354	72.85079365079365	0.019985363550178284	0.04740711977198525
BLCA	Hypo	chr3	54158728	55005522	44	-17.545735615517167	56.61876654898499	74.16450216450217	1.4571496438904582e-8	4.272072442547811e-7
BLCA	Hypo	chr3	55034387	55507559	25	-16.055839112343968	61.21844660194175	77.27428571428571	0.0019195159701052335	0.008070404507277609
BLCA	Hypo	chr3	55523099	56499987	50	-13.247272306981046	53.863203883495146	67.11047619047619	0.0010177824946201023	0.005037562515415927
BLCA	Hypo	chr3	59036158	59560961	8	-21.63437644475266	61.210861650485434	82.8452380952381	0.0014763014763014763	0.0064478646670427485
BLCA	Hypo	chr3	59645614	59749626	6	-16.9871705963939	62.965210355987054	79.95238095238095	0.020562770562770564	0.04785472029997578
BLCA	Hypo	chr3	59759843	61543023	49	-11.12298914017757	50.48439667128988	61.607385811467445	0.008584549922187368	0.025391950523609486
BLCA	Hypo	chr3	61580543	62128744	43	-15.66838693029707	62.83991871754346	78.50830564784053	3.5394936989876188e-6	5.0530234672860557e-5
BLCA	Hypo	chr3	62165035	62304264	13	-15.547254525409866	69.39413741598207	84.94139194139194	0.0017429763667480723	0.007446820300589754
BLCA	Hyper	chr3	62351484	62360893	40	20.93860090152566	36.49217233009709	15.553571428571429	5.7990319003732253e-11	3.550018395354784e-9
BLCA	Hyper	chr3	62362660	62365402	19	19.627150400272527	40.29381706693919	20.666666666666668	8.160994401744994e-5	6.643396719377946e-4
BLCA	Hypo	chr3	62368097	62856521	19	-18.06217607124608	52.2686509964231	70.33082706766918	0.004956885057963551	0.0165778341186788
BLCA	Hyper	chr3	62860802	62861796	10	24.322376329172446	40.574757281553396	16.252380952380953	2.165017644893806e-5	2.2059540637453268e-4
BLCA	Hypo	chr3	62926690	63263752	17	-24.36849691332844	53.53626499143347	77.90476190476191	6.073861081840963e-6	7.772104514757033e-5
BLCA	Hyper	chr3	63263824	63264919	8	12.239742256125751	25.93021844660194	13.69047619047619	0.0036810312613196824	0.01308887138086348
BLCA	Hyper	chr3	64251663	64254112	8	19.053889274156266	45.29793689320388	26.244047619047617	0.010334110334110334	0.028891710733142957
BLCA	Hypo	chr3	64676361	65340538	15	-23.585922330097087	46.347411003236246	69.93333333333334	8.326074320940664e-4	0.004345915464109002
BLCA	Hypo	chr3	66446342	66543263	23	-15.00653279462904	64.6787674124103	79.68530020703933	0.0012244435943579825	0.005600383971325333
BLCA	Hypo	chr3	66680257	66846049	7	-20.747275609272837	61.08945908460471	81.83673469387755	0.013111888111888112	0.034537751405221286
BLCA	Hyper	chr3	68056706	68057357	6	17.75587532747727	35.954288025889966	18.1984126984127	0.0010822510822510823	0.005118285093563215
BLCA	Hypo	chr3	68185630	68978377	10	-24.00505085529357	37.44733009708738	61.45238095238095	0.0057481218471930546	0.0183882225646828
BLCA	Hypo	chr3	69436007	69590636	8	-19.186748728617662	24.664441747572816	43.851190476190474	0.010334110334110334	0.028891710733142957
BLCA	Hyper	chr3	69590955	69592090	8	19.359931229773462	28.943264563106794	9.583333333333334	7.77000777000777e-5	6.345368138324382e-4
BLCA	Hypo	chr3	69792875	70800230	43	-16.852428259630788	59.00914427636035	75.86157253599114	1.6058826626972643e-5	1.763014940453295e-4
BLCA	Hypo	chr3	73086974	73641305	41	-14.344085112140997	62.89284868576841	77.2369337979094	1.7716884368148887e-5	1.8960783102807733e-4
BLCA	Hyper	chr3	73673231	73674702	16	11.447338765603329	27.250910194174757	15.803571428571429	5.746319556357511e-6	7.402497852735299e-5
BLCA	Hypo	chr3	73707412	74663024	24	-19.448354908306364	50.89886731391586	70.34722222222223	1.5031388247122075e-4	0.0010903925152286127
BLCA	Hypo	chr3	75958299	77064282	13	-21.608298659269533	56.59316654219567	78.2014652014652	3.9747706863065593e-4	0.002398654991452507
BLCA	Hypo	chr3	77129373	79416702	47	-12.221798428109107	55.49653997108035	67.71833839918946	0.0010079009273412229	0.004995115217626319
BLCA	Hypo	chr3	81940766	85006115	17	-21.80292213972968	61.05982295830954	82.86274509803921	6.387752943167935e-5	5.504401522648765e-4
BLCA	Hypo	chr3	89164038	90139296	11	-18.7058168368848	53.74007060900265	72.44588744588745	0.01403253609135962	0.036270825755153356
BLCA	Hypo	chr3	93851734	96168838	22	-13.768928886647336	67.43236981465137	81.2012987012987	0.004430352071094818	0.015027062964546785
BLCA	Hyper	chr3	96533258	96534005	9	19.01353572712796	30.849514563106798	11.835978835978835	8.227067050596462e-5	6.661747838218427e-4
BLCA	Hypo	chr3	97591258	98216965	37	-12.978723869500568	62.20145631067961	75.18018018018019	3.174300563897002e-4	0.002002452424974432
BLCA	Hypo	chr3	98674154	99353080	7	-28.302869691565945	32.58148404993065	60.8843537414966	0.00874125874125874	0.025413416370863178
BLCA	Hypo	chr3	99364061	99513656	10	-23.044336569579286	48.82233009708738	71.86666666666666	0.009271688064257724	0.026677061843868304
BLCA	Hypo	chr3	100463708	101231396	28	-11.629726405125156	56.61347087378641	68.24319727891157	0.015856372144827012	0.03993843306524565
BLCA	Hypo	chr3	102154087	104813499	26	-23.356569401472314	54.044529499626584	77.4010989010989	5.894313355508115e-6	7.567665402071828e-5
BLCA	Hypo	chr3	105159482	105244696	7	-9.363367677167952	76.11962552011096	85.48299319727892	0.00874125874125874	0.025413416370863178
BLCA	Hypo	chr3	105591430	106718760	10	-16.288037447988906	67.74053398058253	84.02857142857142	0.004465348892593475	0.015092248112246144
BLCA	Hypo	chr3	108115132	108248186	8	-16.60004912159038	61.13804611650485	77.73809523809524	0.014063714063714063	0.036270825755153356
BLCA	Hypo	chr3	108363248	109072059	45	-19.953390352904915	58.42756202804746	78.38095238095238	6.57313452345983e-6	8.286264476691042e-5
BLCA	Hypo	chr3	109550978	110638102	11	-19.253131173034088	53.06288614298323	72.31601731601732	0.007884530330350765	0.023604235558624433
BLCA	Hyper	chr3	112051808	112053517	6	15.049969178609954	27.248381877022652	12.198412698412698	0.020562770562770564	0.04785472029997578
BLCA	Hypo	chr3	112973542	112992570	6	-17.241119586993378	68.36205501618123	85.60317460317461	0.007575757575757576	0.022867730560038255
BLCA	Hyper	chr3	113160071	113160637	9	23.752863820824984	70.8586839266451	47.10582010582011	0.0019950637597696418	0.00830589112609211
BLCA	Hypo	chr3	113841596	114328840	64	-10.914203363384189	59.855885922330096	70.77008928571429	9.99066092438681e-4	0.004960969331175072
BLCA	Hypo	chr3	115395513	116142557	26	-15.96620167858032	49.43306572068708	65.3992673992674	0.0016865662194147642	0.007230030650398753
BLCA	Hypo	chr3	116366327	117714932	42	-28.59009477577439	42.83847665279704	71.42857142857143	7.2507851841483285e-9	2.3410551995402114e-7
BLCA	Hypo	chr3	118706648	118924865	40	-10.428470295885344	48.95843446601942	59.38690476190476	0.018367270683655307	0.045119215175386966
BLCA	Hypo	chr3	121949083	122044172	16	-17.134911003236247	52.76092233009709	69.89583333333333	0.02130973030080053	0.04945770587252825
BLCA	Hypo	chr3	122598701	122764562	62	-9.284084977555068	46.613764484810524	55.89784946236559	0.01987026937992043	0.04740711977198525
BLCA	Hypo	chr3	122992823	123162899	17	-12.858611405727341	59.45231296402056	72.3109243697479	0.019377924544184376	0.04652285073465335
BLCA	Hypo	chr3	123708030	124082907	42	-13.297181493956804	50.07356680536292	63.37074829931973	0.004323774629798899	0.014748682602645202
BLCA	Hyper	chr3	126113640	126114064	9	25.61328145066009	41.10005393743258	15.486772486772487	0.0023483760975352235	0.0092484682955942
BLCA	Hyper	chr3	128209772	128217091	19	19.368329805095264	52.33073582013286	32.962406015037594	9.248169764685701e-6	1.1161986599270501e-4
BLCA	Hypo	chr3	129180151	129275655	24	-14.448258591462475	66.6747572815534	81.12301587301587	0.0013648426505894402	0.006148521346600577
BLCA	Hypo	chr3	129281748	129306552	14	-13.182104880787266	67.67163661581137	80.85374149659864	0.005300075280557176	0.017298740050645883
BLCA	Hyper	chr3	129693370	129694683	12	29.320580983202344	45.70550161812298	16.384920634920636	4.437613806304074e-6	6.020677454935953e-5
BLCA	Hypo	chr3	129931221	130063505	9	-25.15566086197154	60.11947141316073	85.27513227513228	0.0013780337309749072	0.006148521346600577
BLCA	Hypo	chr3	130068026	130235479	7	-31.878805891288554	47.43411927877948	79.31292517006803	0.00874125874125874	0.025413416370863178
BLCA	Hypo	chr3	130239579	130368395	11	-19.41310469465809	69.26654898499558	88.67965367965368	0.0020512253484389707	0.008443236345484132
BLCA	Hyper	chr3	132756986	132757973	13	15.29564529321811	24.66560866318148	9.36996336996337	4.326673461146473e-6	5.9695924132016296e-5
BLCA	Hypo	chr3	132760544	133180261	30	-20.53137232239174	46.76545307443366	67.2968253968254	4.072312705691926e-5	3.7370686104667186e-4
BLCA	Hypo	chr3	133647103	133727885	8	-21.236144822006473	55.55552184466019	76.79166666666667	0.0034965034965034965	0.012496611282225482
BLCA	Hypo	chr3	134371285	134513690	7	-22.536226140941814	51.63384188626907	74.17006802721089	0.01893939393939394	0.0457066423039958
BLCA	Hypo	chr3	134518358	134801915	8	-25.318250115580213	41.97936893203884	67.29761904761905	0.0014763014763014763	0.0064478646670427485
BLCA	Hypo	chr3	136766602	137321245	9	-19.43499255149741	38.607335490830636	58.042328042328045	0.019991772932949403	0.04740711977198525
BLCA	Hyper	chr3	137479590	137482267	10	14.772549699491448	29.79635922330097	15.023809523809524	1.0283833813245577e-4	7.972836508506095e-4
BLCA	Hyper	chr3	137483479	137484586	12	19.364029511480968	34.12196601941748	14.757936507936508	7.211122435244121e-5	6.052745161543398e-4
BLCA	Hypo	chr3	137492929	137728329	13	-19.351639460862764	55.33700522778193	74.68864468864469	0.001174643770551699	0.005431041771759275
BLCA	Hypo	chr3	137728909	137808241	13	-10.830443828016643	75.87285287528006	86.7032967032967	0.0050843220583427886	0.016920840346446073
BLCA	Hyper	chr3	138657291	138659021	13	17.500204488068565	31.481889469753547	13.981684981684982	6.441936042151415e-6	8.172985920672996e-5
BLCA	Hyper	chr3	139257713	139258948	15	18.77470334412082	39.06359223300971	20.288888888888888	0.0018371554676737997	0.007758856727393933
BLCA	Hypo	chr3	139655800	140617283	26	-22.840908282655857	47.9100074682599	70.75091575091575	1.2810071614856932e-4	9.619496368683538e-4
BLCA	Hypo	chr3	140774868	140788453	9	-17.388914573380596	69.08198489751888	86.47089947089947	0.0013780337309749072	0.006148521346600577
BLCA	Hypo	chr3	141493462	141499950	19	-11.962965666593668	74.04956566172713	86.0125313283208	3.0795845976965095e-4	0.001970316165683419
BLCA	Hyper	chr3	141514782	141516705	7	20.805808731259493	39.17995839112344	18.374149659863946	0.01483112945568861	0.03789242156758906
BLCA	Hyper	chr3	142839578	142840240	6	21.165973185390662	33.88025889967638	12.714285714285714	0.012987012987012988	0.034537751405221286
BLCA	Hypo	chr3	142840837	143532568	26	-15.972389665350828	61.7620425690814	77.73443223443223	0.0011548689268580708	0.00541165953787313
BLCA	Hypo	chr3	143993048	145768808	7	-12.695231490654516	73.10748959778086	85.80272108843538	0.0036131111133158285	0.012883283429213755
BLCA	Hyper	chr3	147072597	147077671	19	13.525032240796165	28.24182422074604	14.716791979949875	1.0789725666158417e-4	8.248050029714706e-4
BLCA	Hyper	chr3	147087225	147116420	64	24.141829562528894	41.50269265776699	17.360863095238095	4.7240477442070915e-18	9.769841442884504e-16
BLCA	Hyper	chr3	147122664	147232332	90	22.458588894025787	43.41202804746494	20.953439153439152	1.2302721045213969e-19	3.138014047932576e-17
BLCA	Hyper	chr3	148414664	148416019	8	12.678441400832178	24.94629854368932	12.267857142857142	0.014063714063714063	0.036270825755153356
BLCA	Hypo	chr3	148416308	148668231	17	-22.624180740257266	46.95845231296402	69.58263305322129	9.949969194031376e-4	0.004949678179288615
BLCA	Hypo	chr3	150484093	150800762	26	-14.938706924143817	54.85250186706497	69.79120879120879	0.005500656373167772	0.017836829836829837
BLCA	Hypo	chr3	150826472	150967799	14	-10.26455485106664	75.97694174757282	86.24149659863946	7.165113693583204e-4	0.0038207282218326605
BLCA	Hypo	chr3	153106148	153679297	7	-22.612393501089755	49.367198335644936	71.9795918367347	0.01893939393939394	0.0457066423039958
BLCA	Hypo	chr3	155737440	156008127	13	-18.71504143106085	55.50840179238237	74.22344322344323	0.009549352921946811	0.027113784251850463
BLCA	Hyper	chr3	156008770	156009680	7	10.878690311075887	22.756241331484052	11.877551020408163	0.005536130536130536	0.017836829836829837
BLCA	Hypo	chr3	156022310	156233448	6	-20.87871783017414	58.53398058252427	79.41269841269842	0.007575757575757576	0.022867730560038255
BLCA	Hyper	chr3	157812018	157815145	12	29.233491292957314	57.5707928802589	28.337301587301585	2.4776677085197745e-5	2.471853103727942e-4
BLCA	Hyper	chr3	157819282	157821994	8	24.981955039297272	50.505764563106794	25.523809523809526	9.324009324009324e-4	0.004696992715425895
BLCA	Hypo	chr3	165610644	166782547	6	-15.100824472183694	74.581715210356	89.68253968253968	0.0021645021645021645	0.00869436774948586
BLCA	Hypo	chr3	169539775	169684239	10	-20.173116042533515	48.63640776699029	68.80952380952381	0.015572785395513713	0.03956273368076724
BLCA	Hyper	chr3	170302640	170304045	12	20.60498535983973	41.7200647249191	21.115079365079364	4.2896933460939387e-4	0.002562430404708105
BLCA	Hypo	chr3	170714485	170744964	6	-13.137347819386653	74.49757281553399	87.63492063492063	0.012987012987012988	0.034537751405221286
BLCA	Hypo	chr3	170825091	171161784	20	-10.789551548774849	73.5985436893204	84.38809523809523	0.002133372842373181	0.008674053660913698
BLCA	Hyper	chr3	172163211	172167810	17	22.169977699817792	43.94588806396345	21.77591036414566	3.0850534843020774e-5	2.9619610115281674e-4
BLCA	Hypo	chr3	173438075	176414852	44	-12.58122924809818	57.52807811120918	70.10930735930737	0.0017686959771509871	0.007531475579943991
BLCA	Hyper	chr3	179754239	179755235	11	18.798953473710757	28.604148278905562	9.805194805194805	1.4175710770138016e-6	2.3177892908781214e-5
BLCA	Hypo	chr3	179758307	180317769	14	-18.549319727891156	57.892857142857146	76.4421768707483	0.00927700752307025	0.026677061843868304
BLCA	Hypo	chr3	180466040	180550814	12	-17.53773693943597	66.74797734627832	84.28571428571429	0.0027797952484989773	0.010566812340543554
BLCA	Hyper	chr3	181421427	181422217	6	22.096798428109103	45.644417475728154	23.547619047619047	0.007575757575757576	0.022867730560038255
BLCA	Hyper	chr3	181428242	181428697	14	12.9917938049006	46.01560332871012	33.023809523809526	4.3164405816694334e-4	0.0025743884123877246
BLCA	Hyper	chr3	181437145	181447418	37	23.360222913620973	48.81710837050643	25.456885456885455	4.5540536099748374e-14	4.709137597773981e-12
BLCA	Hypo	chr3	183749212	183818368	15	-14.640899984589307	56.68608414239482	71.32698412698413	0.013177022170029536	0.03461399713184552
BLCA	Hypo	chr3	186314464	186462194	32	-15.422944116967175	54.1469963592233	69.56994047619048	1.070575856684624e-4	8.248050029714706e-4
BLCA	Hyper	chr3	186856928	186857593	7	25.16747572815534	37.0246185852982	11.857142857142858	0.00874125874125874	0.025413416370863178
BLCA	Hypo	chr3	186917755	187012559	21	-14.687014287915812	64.67579750346741	79.36281179138322	0.0022098750960913116	0.008858022124301056
BLCA	Hyper	chr3	187929286	187938319	8	10.885532246879333	87.47481796116504	76.58928571428572	5.439005439005439e-4	0.003057991889733256
BLCA	Hypo	chr3	191109928	192124844	18	-20.464895720963682	65.68325242718447	86.14814814814815	4.794253590907895e-5	4.2657707532124667e-4
BLCA	Hypo	chr3	192973502	193273475	18	-22.951603996506908	50.61717907227616	73.56878306878306	6.372599205215156e-4	0.0034781119199933223
BLCA	Hypo	chr3	195423806	195486805	18	-11.374672522730773	71.14913700107874	82.52380952380952	0.011179685111691944	0.03104025779196907
BLCA	Hypo	chr3	195528460	195578280	32	-12.232583506703651	55.67217839805825	67.9047619047619	0.012780143706732121	0.034537751405221286
BLCA	Hypo	chr3	196065106	196082185	12	-31.945426876252117	42.594255663430424	74.53968253968254	4.2896933460939387e-4	0.002562430404708105
BLCA	Hypo	chr4	50006	53146	6	-14.26554553860379	35.663025889967635	49.92857142857143	0.004329004329004329	0.014748682602645202
BLCA	Hypo	chr4	614552	628649	21	-20.058725755674438	47.09546925566343	67.15419501133786	1.0920970001815102e-4	8.315150492924294e-4
BLCA	Hypo	chr4	642691	657074	38	-11.60590797381804	59.63719979560552	71.24310776942356	0.0037352215623343544	0.013263069788854978
BLCA	Hypo	chr4	671489	682184	22	-14.163887487916615	50.79931597528685	64.96320346320347	0.015368920750204455	0.03916183202816
BLCA	Hypo	chr4	809452	817492	12	-19.916146555709663	46.21480582524272	66.13095238095238	0.010244601273003482	0.028820473875375972
BLCA	Hypo	chr4	984769	989421	10	-13.03495145631068	73.26504854368932	86.3	0.0034207278789322136	0.01247636307416077
BLCA	Hypo	chr4	1019985	1043540	36	-13.412627780346227	48.316208198489754	61.72883597883598	7.850046673195778e-4	0.004128423171360419
BLCA	Hypo	chr4	1046821	1105206	31	-16.55298047812924	42.33949264015033	58.89247311827957	0.0023286450424126067	0.009198983928225806
BLCA	Hypo	chr4	1108671	1163620	23	-17.864585217793323	38.98427606585057	56.84886128364389	0.003031231367908157	0.011298091781409263
BLCA	Hyper	chr4	1201588	1206150	26	10.948504569863792	74.71956684092606	63.77106227106227	0.0013048821039013643	0.005911757169362486
BLCA	Hyper	chr4	1396306	1402434	20	25.10863384188627	44.21577669902913	19.107142857142858	1.3217597973607066e-7	3.16065811543879e-6
BLCA	Hypo	chr4	1409497	1511568	28	-20.25650551482729	48.479889042995836	68.73639455782313	3.2845512522760824e-6	4.721035047119825e-5
BLCA	Hypo	chr4	1526253	1573613	56	-16.623375685225547	47.28393723994452	63.90731292517007	4.0896392170766455e-6	5.74200353927899e-5
BLCA	Hypo	chr4	1600072	1645950	39	-13.784273978448736	66.99228279810804	80.77655677655677	4.15525058837766e-5	3.8033465911801263e-4
BLCA	Hypo	chr4	1748820	1794084	36	-12.821210253249088	37.85868392664509	50.67989417989418	0.01707169657689404	0.04241318902804974
BLCA	Hypo	chr4	2065749	2137514	14	-14.489721616802063	61.67354368932039	76.16326530612245	0.008975449241808228	0.026054680424247557
BLCA	Hypo	chr4	2272482	2302953	21	-13.809765977588444	70.63014331946371	84.43990929705215	4.4959915589117114e-4	0.002658680634373448
BLCA	Hypo	chr4	2304673	2324011	12	-13.943317537370937	70.04874595469255	83.9920634920635	0.007246253544544029	0.022407088934956246
BLCA	Hypo	chr4	2361876	2463228	65	-8.224801735481346	50.55175504107543	58.776556776556774	0.01686524176317669	0.04196839999083839
BLCA	Hypo	chr4	3251225	3288876	23	-14.868695853182981	65.30107640354579	80.16977225672878	0.0034946214219727934	0.012496611282225482
BLCA	Hypo	chr4	3387281	3387765	6	-18.405108645399906	38.69012944983819	57.095238095238095	0.012987012987012988	0.034537751405221286
BLCA	Hypo	chr4	3436168	3489931	68	-14.481490168883088	49.51220731010851	63.9936974789916	2.59261268952274e-4	0.0017176339653877065
BLCA	Hypo	chr4	3536906	3766151	91	-18.702392383390997	52.58593833351115	71.28833071690215	3.784836545258397e-12	3.048586236243922e-10
BLCA	Hypo	chr4	3770608	3871858	26	-15.49381201322949	45.51717699775952	61.010989010989015	0.0013922390757218418	0.006190246024069455
BLCA	Hyper	chr4	4859772	4860468	14	14.478460801796448	56.1995492371706	41.72108843537415	0.001243151214210576	0.005655525024458577
BLCA	Hyper	chr4	4867424	4869091	11	17.97944773672929	40.69373345101501	22.714285714285715	1.3750439447033876e-4	0.001015621261087869
BLCA	Hyper	chr4	5052379	5054079	13	14.262411536683382	25.17083644510829	10.908424908424909	0.008204334365325078	0.02441834561006126
BLCA	Hypo	chr4	5055867	5637894	28	-21.55824004359025	59.94686199722607	81.50510204081633	2.96198842684885e-7	6.278430870428643e-6
BLCA	Hypo	chr4	5822815	5888050	10	-22.88654646324549	48.45631067961165	71.34285714285714	0.004465348892593475	0.015092248112246144
BLCA	Hyper	chr4	5891833	5895098	12	22.895188010479274	37.26820388349515	14.373015873015873	3.587071160095793e-5	3.359641189357773e-4
BLCA	Hypo	chr4	5895410	6007279	19	-20.07589970070808	45.863949923352074	65.93984962406014	3.939552433047621e-4	0.0023868135564275848
BLCA	Hypo	chr4	6024855	6107021	19	-17.565479232060735	58.930761369443026	76.49624060150376	7.106264121304988e-4	0.0038105909639961997
BLCA	Hypo	chr4	6107791	6199338	14	-23.40827884551879	45.47607489597781	68.8843537414966	1.2663087101100293e-5	1.4376549331991014e-4
BLCA	Hypo	chr4	6331035	6423371	20	-14.88626907073509	53.02087378640777	67.90714285714286	0.007148636461399435	0.022137339620650943
BLCA	Hypo	chr4	6732388	6781565	11	-16.127369394359686	49.790379523389234	65.91774891774892	0.011653851824130462	0.03203134847638157
BLCA	Hypo	chr4	7104195	7193237	25	-16.543624595469254	46.789708737864075	63.333333333333336	0.0068655686850329885	0.021534733594086627
BLCA	Hypo	chr4	7268612	7758517	133	-17.913862325717204	54.710197824658735	72.62406015037594	4.4264959112748596e-15	5.463152695657295e-13
BLCA	Hypo	chr4	7965818	8207325	106	-14.633842976648435	52.549894669353364	67.1837376460018	1.679999420185066e-6	2.678199075678359e-5
BLCA	Hypo	chr4	8346218	8359499	12	-20.881511018646943	54.07483818770226	74.9563492063492	9.1488804639969e-4	0.004696992715425895
BLCA	Hypo	chr4	8690489	9497357	22	-15.298984995586936	40.97374227714034	56.27272727272727	0.0086214179407837	0.025413416370863178
BLCA	Hyper	chr4	9782931	9783623	10	26.297919556171983	53.24077669902913	26.942857142857143	2.165017644893806e-5	2.2059540637453268e-4
BLCA	Hyper	chr4	10462849	10463749	7	18.702364440922	41.69556171983356	22.993197278911566	0.013111888111888112	0.034537751405221286
BLCA	Hypo	chr4	12060625	12540012	6	-27.293650793650794	61.666666666666664	88.96031746031746	0.0024990623825412307	0.009726767726961088
BLCA	Hyper	chr4	13530923	13545760	44	16.988103118564283	40.70780008826125	23.71969696969697	1.991131865641024e-7	4.472198526092148e-6
BLCA	Hypo	chr4	16324929	16883525	32	-25.7462039123902	50.765700849514566	76.51190476190476	1.9356354118174503e-7	4.3691687820729e-6
BLCA	Hypo	chr4	16900733	17490571	23	-23.87243964702808	51.1317011397214	75.00414078674949	4.602694798594739e-5	4.1113638161721704e-4
BLCA	Hypo	chr4	17515119	17528591	9	-17.880053423742744	68.13052858683926	86.01058201058201	6.170300287947346e-4	0.0033821731950840323
BLCA	Hypo	chr4	18399893	20195367	16	-28.2665857605178	47.19174757281554	75.45833333333333	1.4843272461442303e-5	1.650882570856926e-4
BLCA	Hyper	chr4	20254519	20256841	11	25.24205648720212	40.06023830538393	14.818181818181818	1.4175710770138016e-6	2.3177892908781214e-5
BLCA	Hypo	chr4	20257590	20698772	12	-23.107980813684698	58.4872572815534	81.5952380952381	9.1488804639969e-4	0.004696992715425895
BLCA	Hypo	chr4	20811042	20960712	9	-25.90826783787949	45.663160733549084	71.57142857142857	0.009378856437679967	0.026748792195723854
BLCA	Hypo	chr4	21470137	21947400	15	-27.626190476190473	37.11666666666667	64.74285714285715	1.9702481060811182e-4	0.001365732146288076
BLCA	Hyper	chr4	21949853	21951046	10	23.11875866851595	41.74733009708738	18.62857142857143	1.082508822446903e-5	1.264634734254e-4
BLCA	Hypo	chr4	22461750	23881105	32	-17.56096495030051	49.9048088592233	67.46577380952381	4.7279090377000974e-4	0.0027765126597452915
BLCA	Hypo	chr4	23892515	24330712	22	-23.1574097423612	46.70189761694616	69.85930735930737	3.4703107316070165e-4	0.002158928269776983
BLCA	Hypo	chr4	26033992	26165511	9	-16.184876971284737	51.349514563106794	67.53439153439153	0.015734265734265736	0.03967311545959254
BLCA	Hypo	chr4	27024486	30716343	24	-21.12819290337494	44.0146642394822	65.14285714285714	0.0029585148201569746	0.011064787587410151
BLCA	Hypo	chr4	30745743	36076000	15	-17.72824009862845	56.39239482200647	74.12063492063493	0.008215861109692833	0.024424152762769838
BLCA	Hyper	chr4	37245195	37247586	12	16.45517414085375	38.875809061488674	22.42063492063492	0.0022565266205056217	0.009007272665680239
BLCA	Hypo	chr4	40043204	40049006	9	-3.4180921559562325	87.88349514563107	91.3015873015873	0.015734265734265736	0.03967311545959254
BLCA	Hyper	chr4	41258560	41259283	7	16.05270457697642	33.19556171983356	17.142857142857142	0.0034965034965034965	0.012496611282225482
BLCA	Hyper	chr4	41746614	41754125	29	20.518799719419068	39.4481921660529	18.929392446633827	2.5415905772145503e-7	5.493856242046818e-6
BLCA	Hyper	chr4	41880319	41883890	22	19.964269953347625	42.33439982347749	22.37012987012987	6.773649338188771e-4	0.0036656269261542062
BLCA	Hyper	chr4	42153195	42155308	11	15.414334047829193	35.60481023830538	20.19047619047619	0.004164823824266549	0.014492602047879779
BLCA	Hyper	chr4	42398518	42400464	13	18.400814395960026	29.408140403286033	11.007326007326007	2.6152337365152012e-5	2.5821636841050736e-4
BLCA	Hypo	chr4	42894337	43901084	14	-25.42135592100918	43.71809986130374	69.13945578231292	0.0017592717229276658	0.007495516271627227
BLCA	Hyper	chr4	44448469	44450358	6	17.524907535829865	28.953478964401295	11.428571428571429	0.0010822510822510823	0.005118285093563215
BLCA	Hyper	chr4	46390832	46392657	17	12.919080253460606	21.67818389491719	8.759103641456582	5.956446242245617e-8	1.5294874713309886e-6
BLCA	Hyper	chr4	46994956	46996264	11	18.10854032698693	28.948367166813767	10.83982683982684	0.0029015054978667795	0.010883490230233626
BLCA	Hyper	chr4	47033423	47034939	9	13.996494066882418	25.329827400215752	11.333333333333334	0.0019950637597696418	0.00830589112609211
BLCA	Hypo	chr4	47035074	47430173	9	-23.2490111470694	60.56580366774541	83.81481481481481	0.0013780337309749072	0.006148521346600577
BLCA	Hypo	chr4	47707064	47769337	8	-16.951745261211283	59.970873786407765	76.92261904761905	0.018958818958818957	0.0457066423039958
BLCA	Hyper	chr4	56659770	56686245	11	23.08892321270962	54.81619593998235	31.727272727272727	0.003317116320212295	0.01219143807985806
BLCA	Hypo	chr4	57035948	57180335	12	-10.361342271536444	78.40453074433657	88.76587301587301	0.005088340875775914	0.016920840346446073
BLCA	Hyper	chr4	57518456	57523055	13	22.05527401401188	51.469193427931295	29.413919413919412	0.00915280668453862	0.02652927149624603
BLCA	Hypo	chr4	57523826	57624431	11	-13.405634010002942	31.988305383936453	45.39393939393939	0.016798217262613546	0.0418317746595474
BLCA	Hypo	chr4	58086247	61611159	11	-17.215956373723365	52.53729037952339	69.75324675324676	0.0199877521858946	0.04740711977198525
BLCA	Hypo	chr4	62076499	62359523	6	-25.42001849283403	59.86569579288026	85.28571428571429	0.0010822510822510823	0.005118285093563215
BLCA	Hypo	chr4	62397911	66321852	25	-21.126495607951917	58.703980582524274	79.83047619047619	1.8742031382996758e-5	1.9925933760231784e-4
BLCA	Hyper	chr4	66533472	66535655	12	16.258870781322237	30.996966019417474	14.738095238095237	3.698011505253395e-7	7.620187001931212e-6
BLCA	Hypo	chr4	66758895	68303581	9	-19.43488981353059	62.94606256742179	82.38095238095238	0.004003164778644802	0.014019321229377588
BLCA	Hypo	chr4	68604257	68919575	8	-12.744090961627371	72.2320995145631	84.97619047619048	0.0014763014763014763	0.0064478646670427485
BLCA	Hypo	chr4	70626128	71550957	33	-18.039535437593692	59.318328920270666	77.35786435786436	2.0992463136806743e-7	4.683216557517353e-6
BLCA	Hypo	chr4	72118736	72262518	12	-19.64425373709354	55.72876213592233	75.37301587301587	0.0027797952484989773	0.010566812340543554
BLCA	Hypo	chr4	72631312	72686016	7	-27.204312793078397	50.809292649098474	78.01360544217687	0.0011655011655011655	0.00541165953787313
BLCA	Hypo	chr4	74241932	74570525	33	-15.2389603384749	44.20837010885555	59.447330447330444	0.0026488133277561303	0.010144504296291245
BLCA	Hypo	chr4	80138126	80334832	21	-15.12596041652907	73.42279241793804	88.54875283446712	6.565665163082452e-5	5.594707107784735e-4
BLCA	Hyper	chr4	81106240	81107185	11	16.862470054217628	31.38195057369815	14.519480519480519	0.006418761836718493	0.020245822578140938
BLCA	Hypo	chr4	83486706	83631584	14	-13.63914206459283	70.67718446601941	84.31632653061224	0.007053962698733193	0.022000570694440464
BLCA	Hyper	chr4	85401758	85419151	35	24.800095766461926	48.83002773925104	24.029931972789115	2.8366658394712243e-9	1.069269310523833e-7
BLCA	Hyper	chr4	85422409	85425213	9	17.731070529614218	31.783980582524272	14.052910052910052	0.007095845331139449	0.022000570694440464
BLCA	Hypo	chr4	86708298	86874205	10	-15.61990291262136	39.78009708737864	55.4	0.017731494511680268	0.04366958352216846
BLCA	Hypo	chr4	88600466	88896942	19	-16.406745017884514	55.751149718957585	72.15789473684211	0.009123191945168054	0.026463481715097024
BLCA	Hypo	chr4	92008475	93198846	14	-13.139942870352025	75.03692787794729	88.17687074829932	2.6163732719123754e-4	0.001725904161782198
BLCA	Hypo	chr4	93281566	94683967	12	-20.953084065341347	61.09850323624595	82.0515873015873	5.517066348644952e-4	0.003095058042509617
BLCA	Hypo	chr4	96549942	99008595	17	-16.723341763890023	67.67161621930326	84.39495798319328	0.0011345607400720763	0.005342559251096325
BLCA	Hypo	chr4	100065546	100434274	28	-10.885856284261276	60.29611650485437	71.18197278911565	0.011614272457523878	0.032017444551683184
BLCA	Hypo	chr4	100571622	100632951	19	-12.275573642844977	70.22317322432295	82.49874686716792	0.004123436475808677	0.0144141324407894
BLCA	Hypo	chr4	100676482	100738139	6	-24.470815996301432	33.71966019417476	58.19047619047619	0.020562770562770564	0.04785472029997578
BLCA	Hypo	chr4	101726770	102087758	13	-8.929638322842207	78.90552651232262	87.83516483516483	0.002107570717074015	0.008596551773481004
BLCA	Hyper	chr4	107955541	107958572	13	15.876178029090651	27.60511575802838	11.728937728937728	8.662961752206603e-5	6.970450402511559e-4
BLCA	Hyper	chr4	110223040	110224288	19	14.08889943304864	24.364588656106285	10.275689223057643	5.517005081738844e-9	1.8679700391798955e-7
BLCA	Hyper	chr4	111535334	111552040	55	17.325425545328457	49.52802294792586	32.202597402597405	9.292840532989627e-8	2.2864570983420138e-6
BLCA	Hyper	chr4	111553999	111562545	26	19.751515878943064	50.24785287528006	30.496336996336996	1.4453439092236671e-5	1.6098648607539302e-4
BLCA	Hyper	chr4	113298593	113300821	6	15.383263985205732	84.62135922330097	69.23809523809524	0.0021645021645021645	0.00869436774948586
BLCA	Hyper	chr4	113431869	113432911	7	19.54545604649627	46.94001386962552	27.39455782312925	0.00874125874125874	0.025413416370863178
BLCA	Hyper	chr4	113441608	113444577	14	20.402714483851796	37.035367545076284	16.632653061224488	1.599380092607648e-5	1.758398917907144e-4
BLCA	Hyper	chr4	114213574	114214449	6	14.717252273077518	61.78074433656958	47.06349206349206	0.020562770562770564	0.04785472029997578
BLCA	Hypo	chr4	114238277	114357601	11	-18.29126213592233	56.61782877316858	74.9090909090909	0.016798217262613546	0.0418317746595474
BLCA	Hypo	chr4	115527443	117631090	24	-14.778182308522116	62.66626213592233	77.44444444444444	8.047647279788583e-4	0.004220740026383978
BLCA	Hypo	chr4	120991796	121786690	6	-15.923139158576054	64.07686084142395	80	0.020562770562770564	0.04785472029997578
BLCA	Hyper	chr4	121992261	121994123	11	16.431576514100787	25.089585172109444	8.658008658008658	9.05702480294115e-5	7.219203520011008e-4
BLCA	Hypo	chr4	122085241	122300140	10	-19.51829634766528	67.87694174757281	87.3952380952381	1.6237632336703542e-4	0.0011526007666090492
BLCA	Hyper	chr4	122301573	122302331	11	18.875173370319	31.446601941747574	12.571428571428571	1.4175710770138016e-6	2.3177892908781214e-5
BLCA	Hyper	chr4	122685145	122686667	15	17.328255509323473	40.92508090614887	23.596825396825395	0.006399515670441353	0.020218453307273836
BLCA	Hyper	chr4	126237986	126238929	6	19.654145476961013	33.05097087378641	13.396825396825395	0.0010822510822510823	0.005118285093563215
BLCA	Hypo	chr4	126240744	128440118	22	-20.313059513302232	60.38823918799647	80.7012987012987	9.939769071450901e-5	7.825011618800648e-4
BLCA	Hypo	chr4	130014987	131254713	17	-15.272069021783471	50.517846944603086	65.78991596638656	0.01499932108849056	0.03830934745298056
BLCA	Hyper	chr4	134070819	134073627	6	19.14401294498382	32.14401294498382	13	0.0010822510822510823	0.005118285093563215
BLCA	Hypo	chr4	135248186	138435350	27	-18.11204431430969	65.33063646170442	83.44268077601411	7.623944672381238e-6	9.409423327913102e-5
BLCA	Hypo	chr4	139145210	139600734	24	-12.89690245030051	58.9126213592233	71.80952380952381	0.0043888222831940564	0.014899409099822946
BLCA	Hypo	chr4	140245762	140357595	6	-14.405513176144243	75.35639158576052	89.76190476190476	0.012987012987012988	0.034537751405221286
BLCA	Hypo	chr4	144622313	145277815	17	-19.60209812080172	51.58837806967447	71.19047619047619	0.0023960786323238377	0.00939282463859734
BLCA	Hyper	chr4	147557859	147576547	22	23.92567141596268	39.39320388349515	15.467532467532468	1.8508263691335855e-8	5.304315871389587e-7
BLCA	Hypo	chr4	148984769	149362435	11	-9.187166393477074	76.91240070609003	86.0995670995671	0.004302735930145163	0.014748682602645202
BLCA	Hypo	chr4	149709111	150954469	15	-19.102080443828015	55.97411003236246	75.07619047619048	7.040597348384631e-4	0.003780677256830821
BLCA	Hyper	chr4	151502935	151505084	12	15.207110109415936	86.75869741100324	71.5515873015873	9.1488804639969e-4	0.004696992715425895
BLCA	Hypo	chr4	152839337	152960525	6	-18.661677454153182	61.11610032362459	79.77777777777777	0.020562770562770564	0.04785472029997578
BLCA	Hypo	chr4	154216535	154256138	10	-10.485402219140083	75.82888349514563	86.31428571428572	0.011615319664855269	0.032017444551683184
BLCA	Hyper	chr4	154709441	154710873	20	23.567227230698105	38.09817961165049	14.530952380952382	8.705333462309812e-11	5.046455428302627e-9
BLCA	Hypo	chr4	154716626	155105000	6	-20.382994298042842	72.10113268608414	92.48412698412699	0.0010822510822510823	0.005118285093563215
BLCA	Hypo	chr4	155483083	155545435	13	-18.58500480102422	57.85455563853622	76.43956043956044	0.002107570717074015	0.008596551773481004
BLCA	Hyper	chr4	155662438	155664311	14	21.200036325209695	41.80547850208045	20.60544217687075	3.090209018705872e-4	0.0019738129725490263
BLCA	Hyper	chr4	156128904	156130206	12	14.770833333333334	25.270833333333332	10.5	0.003405868596338377	0.012469716028316391
BLCA	Hypo	chr4	156131884	156296145	8	-25.63069232547388	62.98240291262136	88.61309523809524	1.554001554001554e-4	0.0011152038051129875
BLCA	Hyper	chr4	158141449	158144020	13	18.145133183968134	33.42718446601942	15.282051282051283	3.845931965463531e-7	7.847752373260518e-6
BLCA	Hypo	chr4	159816181	160018054	10	-13.374722607489598	67.23956310679611	80.61428571428571	0.004465348892593475	0.015092248112246144
BLCA	Hypo	chr4	164270960	164395149	11	-13.39278359181272	73.35613415710503	86.74891774891775	0.016798217262613546	0.0418317746595474
BLCA	Hypo	chr4	165628435	165877045	15	-14.10294344274927	67.12880258899676	81.23174603174603	1.9702481060811182e-4	0.001365732146288076
BLCA	Hyper	chr4	165898666	165898926	7	21.520804438280166	47.23509015256588	25.714285714285715	0.0011655011655011655	0.00541165953787313
BLCA	Hypo	chr4	165899396	165980885	16	-14.947317094313455	69.32054004854369	84.26785714285714	0.004231745108170972	0.014712091580065551
BLCA	Hyper	chr4	172733760	172734843	10	14.066481738326399	23.690291262135922	9.623809523809523	5.25016778886748e-4	0.0030093096569598467
BLCA	Hyper	chr4	174429872	174431058	6	20.457582061950994	49.98139158576052	29.523809523809526	0.020562770562770564	0.04785472029997578
BLCA	Hyper	chr4	174439756	174440681	7	18.181081170332213	53.45319001386962	35.27210884353742	0.0011655011655011655	0.00541165953787313
BLCA	Hyper	chr4	174442784	174452835	45	17.822384034519956	39.511272923408846	21.68888888888889	4.271016481994755e-7	8.600478452690492e-6
BLCA	Hypo	chr4	175752696	176068376	11	-24.873817929643174	56.74955869373345	81.62337662337663	1.948872999850579e-4	0.0013631422481587413
BLCA	Hypo	chr4	177347632	177648950	8	-15.646541262135923	68.35345873786407	84	0.002331002331002331	0.009198983928225806
BLCA	Hypo	chr4	181452599	182287231	9	-21.0177479837674	54.15156418554477	75.16931216931216	0.015734265734265736	0.03967311545959254
BLCA	Hypo	chr4	182609697	182909542	11	-30.034201235657548	40.420344218887905	70.45454545454545	5.202485852640651e-4	0.0029975169175975817
BLCA	Hyper	chr4	183064035	183066337	10	12.861430883032824	21.337621359223302	8.476190476190476	3.788780878564161e-5	3.518416417812252e-4
BLCA	Hypo	chr4	183068417	183727387	72	-18.00148167411517	55.656587108953616	73.65806878306879	3.2468268088437203e-9	1.1887425235058445e-7
BLCA	Hypo	chr4	183729073	183787513	18	-12.780840653413469	72.90169902912622	85.68253968253968	0.002080814486589528	0.008551517760743544
BLCA	Hypo	chr4	184032120	184344219	54	-7.359454461396209	62.489751887810144	69.84920634920636	0.004468094196371357	0.015094859510213521
BLCA	Hypo	chr4	184908254	184909018	9	-12.555799558226743	36.528856526429344	49.08465608465608	0.0013780337309749072	0.006148521346600577
BLCA	Hypo	chr4	184917686	184932237	26	-5.006059070379457	86.79247572815534	91.7985347985348	0.007277601871531023	0.02246398125088963
BLCA	Hyper	chr4	185942086	185942800	8	11.354701225150253	20.19993932038835	8.845238095238095	0.010334110334110334	0.028891710733142957
BLCA	Hypo	chr4	186396433	186436021	18	-12.54126213592233	71.68096008629989	84.22222222222223	0.002588307856963852	0.010013008959295954
BLCA	Hypo	chr4	186921049	186945339	11	-11.138265456226621	68.22969991173875	79.36796536796537	0.01075461300945837	0.02994637208587146
BLCA	Hypo	chr4	187133287	187209867	10	-19.403883495145628	65.59611650485436	85	7.523436316005976e-4	0.003981281790461807
BLCA	Hypo	chr4	187289264	187475891	32	-12.127531929033749	64.74597997572815	76.8735119047619	8.199821112261756e-4	0.004291725796923869
BLCA	Hypo	chr4	187545862	187563992	8	-6.903663892741561	84.74514563106797	91.64880952380952	0.010334110334110334	0.028891710733142957
BLCA	Hypo	chr4	187619391	187646446	43	-6.652520186218538	61.71071347934071	68.36323366555925	0.007257070536309732	0.022426464767443796
BLCA	Hypo	chr4	187647690	187987293	58	-10.021836689145026	66.26305657850686	76.2848932676519	6.616967668465181e-4	0.003598652210312407
BLCA	Hypo	chr4	188047315	188915407	46	-11.637163561076605	74.6413043478261	86.2784679089027	1.7400021153273274e-7	4.022506400750667e-6
BLCA	Hyper	chr4	188916496	188918218	14	24.550293903969354	50.24757281553398	25.697278911564627	1.7000443706595276e-5	1.8359244933105123e-4
BLCA	Hypo	chr4	189012434	189203391	27	-16.143105426276946	67.73696512046027	83.88007054673722	1.2565082174991877e-5	1.4286479762709933e-4
BLCA	Hypo	chr4	189254654	190565909	71	-19.03133688864579	58.062559824969235	77.09389671361502	6.442179600648317e-9	2.1081341876052879e-7
BLCA	Hypo	chr4	190569145	190904746	43	-13.805865561397283	46.52636035222398	60.332225913621265	0.0026556918392726886	0.0101657598569858
BLCA	Hyper	chr4	190938265	190941752	12	16.430112498073665	36.16423948220065	19.734126984126984	7.163048285675827e-4	0.0038207282218326605
BLCA	Hypo	chr5	55041	195698	92	-14.67945209953969	52.857297382861965	67.53674948240166	6.478044261342663e-7	1.2239504861183718e-5
BLCA	Hypo	chr5	353905	399887	36	-11.592929701546206	58.166329557713055	69.75925925925925	0.008609155140104326	0.025413416370863178
BLCA	Hypo	chr5	404264	405986	8	-26.553470295885344	59.08343446601942	85.63690476190476	7.77000777000777e-5	6.345368138324382e-4
BLCA	Hypo	chr5	422114	444228	35	-15.16610527706228	45.23661581137309	60.40272108843537	0.0050966518849120054	0.016926901138605323
BLCA	Hypo	chr5	475889	522363	76	-18.507349989050294	52.33287557485948	70.84022556390977	4.964250978017658e-9	1.6958235930263894e-7
BLCA	Hypo	chr5	529258	561769	36	-17.808486798171263	50.97458198489752	68.78306878306879	1.8222521219828225e-4	0.0012839662281227033
BLCA	Hyper	chr5	561954	565937	6	10.756742179072274	69.9789644012945	59.22222222222222	0.010011193375433443	0.02822610600914396
BLCA	Hypo	chr5	566410	610376	28	-22.642807608480286	52.37760055478502	75.0204081632653	2.7241199973402602e-6	4.0319083596997425e-5
BLCA	Hypo	chr5	788663	856030	27	-17.624852314172703	58.713772024451636	76.33862433862434	3.8784480437476044e-5	3.592964216798628e-4
BLCA	Hypo	chr5	908683	913111	8	-27.926245376791492	51.5439927184466	79.47023809523809	0.002331002331002331	0.009198983928225806
BLCA	Hypo	chr5	932900	963020	14	-18.37829403606103	46.26456310679612	64.64285714285714	0.012062188719881545	0.03296364876612286
BLCA	Hypo	chr5	965717	1008558	26	-14.484907891461289	47.68175877520538	62.166666666666664	0.007277601871531023	0.02246398125088963
BLCA	Hypo	chr5	1020022	1041028	22	-13.931697347959485	70.55748014121801	84.4891774891775	5.748510487213123e-4	0.0032037583574766803
BLCA	Hypo	chr5	1137781	1154998	16	-20.797337320850673	47.5538531553398	68.35119047619048	0.005377764861036308	0.017488591889778932
BLCA	Hypo	chr5	1157364	1245902	120	-20.22350612575127	49.608636731391584	69.83214285714286	2.753479466194607e-13	2.4787793970966043e-11
BLCA	Hypo	chr5	1247290	1294198	85	-16.99397351173479	64.48109651627641	81.4750700280112	1.665642388829467e-13	1.554328726746717e-11
BLCA	Hypo	chr5	1343783	1444333	73	-15.401954730555609	44.79634924857029	60.198303979125896	1.0032242749454574e-4	7.8619346868132e-4
BLCA	Hyper	chr5	1444395	1446443	13	23.64919627298268	40.63088125466766	16.98168498168498	3.9747706863065593e-4	0.002398654991452507
BLCA	Hypo	chr5	1554307	1591977	14	-16.856457631596324	69.1877600554785	86.04421768707483	0.0024527751604074125	0.009580722576537786
BLCA	Hyper	chr5	1594021	1594863	11	14.932921447484555	35.11473962930273	20.18181818181818	0.00019704237970491842	0.001365732146288076
BLCA	Hypo	chr5	1668061	1795139	78	-19.84640278815036	53.24334080159323	73.08974358974359	3.832922060004119e-9	1.3453908074840145e-7
BLCA	Hypo	chr5	1831280	1840632	23	-15.370208446400932	52.29231743351625	67.66252587991718	0.011821069772375393	0.03239786027873084
BLCA	Hypo	chr5	1858105	1866725	14	-21.655059111023053	54.69868238557559	76.35374149659864	0.002880528260121745	0.01082071784312793
BLCA	Hyper	chr5	1875548	1879917	19	23.17302966153247	41.00510986203373	17.832080200501252	1.7748063886285097e-6	2.80595423260028e-5
BLCA	Hyper	chr5	1885367	1888033	11	22.867776236708277	46.87643424536628	24.00865800865801	1.701085292416562e-5	1.8359244933105123e-4
BLCA	Hypo	chr5	1891695	1927225	14	-21.72883230962288	57.46844660194175	79.19727891156462	1.343334180862785e-4	9.999215128367735e-4
BLCA	Hyper	chr5	1930801	1931781	6	15.509728001232855	24.406553398058254	8.896825396825397	0.007575757575757576	0.022867730560038255
BLCA	Hypo	chr5	1932098	2007691	44	-19.82939047198756	50.95415931156222	70.78354978354979	4.289409685691543e-7	8.614845909425639e-6
BLCA	Hypo	chr5	2066634	2726103	178	-22.988276400338687	49.972932802443545	72.96120920278224	3.6536947948691145e-26	2.5416429609398603e-23
BLCA	Hyper	chr5	2738626	2743655	13	19.373146271204526	41.724794622852876	22.35164835164835	3.5863315577947426e-5	3.359641189357773e-4
BLCA	Hyper	chr5	2747922	2753876	20	21.096457466481738	45.87026699029126	24.773809523809526	3.96891749602491e-5	3.659055021636459e-4
BLCA	Hyper	chr5	2754753	2757244	16	22.576181807674526	34.421419902912625	11.845238095238095	2.7870659383218927e-6	4.1091769865200625e-5
BLCA	Hypo	chr5	2763416	2914702	18	-28.42186777623671	50.379719525350595	78.8015873015873	1.0078086659490355e-6	1.740801785968853e-5
BLCA	Hypo	chr5	2917545	3059243	10	-23.00557096625058	48.93252427184466	71.93809523809524	0.009271688064257724	0.026677061843868304
BLCA	Hypo	chr5	3128258	3197320	21	-25.275146951984677	50.697642163661584	75.97278911564626	1.2736047311787946e-6	2.151351744587226e-5
BLCA	Hypo	chr5	3213134	3324867	27	-23.50327049194363	54.42089176555196	77.9241622574956	6.510250312005571e-6	8.234121551647377e-5
BLCA	Hypo	chr5	3327977	3394109	13	-29.057496710409332	47.43334578043316	76.4908424908425	2.6152337365152012e-5	2.5821636841050736e-4
BLCA	Hypo	chr5	3454438	3589702	22	-23.1088292775186	52.37169020300088	75.48051948051948	1.686366402522587e-5	1.8303653492344443e-4
BLCA	Hyper	chr5	3590482	3596704	22	19.50703463203463	36.96590909090909	17.458874458874458	2.208183683425972e-6	3.368134710264979e-5
BLCA	Hyper	chr5	3599686	3607134	20	16.94052242256126	44.15242718446602	27.211904761904762	1.649239498057025e-4	0.0011685167258455884
BLCA	Hypo	chr5	3609364	4942023	105	-26.671468198930057	51.55982431807674	78.2312925170068	1.8752766456917672e-22	7.552429943596528e-20
BLCA	Hypo	chr5	5025803	5137559	9	-26.331907844043766	46.25539374325782	72.58730158730158	0.00520229368176455	0.017054697240480313
BLCA	Hyper	chr5	5139458	5140935	14	18.70124166171323	36.06518723994452	17.36394557823129	2.9862949502201087e-5	2.8779759394312684e-4
BLCA	Hypo	chr5	5141978	5422196	32	-23.193134535367545	49.42293689320388	72.61607142857143	5.030416392208721e-6	6.694390649248893e-5
BLCA	Hypo	chr5	5493320	6349545	38	-22.21833710489817	42.56361778231988	64.78195488721805	2.6002268473459816e-5	2.5739891120170056e-4
BLCA	Hypo	chr5	6476406	6583103	14	-17.908138498117694	52.581657420249655	70.48979591836735	0.008101558955644298	0.02416886125870962
BLCA	Hypo	chr5	6819474	7287160	10	-22.717718446601943	39.98228155339806	62.699999999999996	0.018781735942949206	0.0457066423039958
BLCA	Hypo	chr5	7293155	7392264	6	-23.076051779935273	47.25728155339806	70.33333333333333	0.0021645021645021645	0.00869436774948586
BLCA	Hypo	chr5	7397756	7848160	26	-32.67069863793165	49.591206123973116	82.26190476190476	1.874501431664138e-11	1.2922238698282866e-9
BLCA	Hypo	chr5	7926692	9066665	28	-18.81121623406644	53.45579056865465	72.26700680272108	6.398151351796684e-4	0.003487083628486341
BLCA	Hypo	chr5	9714909	10233474	19	-19.861297661629802	61.24897802759325	81.11027568922306	7.962209918489843e-4	0.004181663026512305
BLCA	Hypo	chr5	10455415	10556455	10	-20.13057096625058	43.00752427184466	63.13809523809524	0.017731494511680268	0.04366958352216846
BLCA	Hypo	chr5	10651897	10704044	13	-14.316485294640634	55.77875280059746	70.0952380952381	0.019347249197161704	0.046511200394810354
BLCA	Hypo	chr5	10757842	11239963	30	-13.18281322237633	52.164805825242716	65.34761904761905	0.0027846398070018323	0.010579972096910636
BLCA	Hypo	chr5	11906843	13807296	23	-22.07958451426159	55.08811734909244	77.16770186335404	2.7898113872509068e-5	2.729876820363675e-4
BLCA	Hypo	chr5	14405632	14406732	8	-15.821963129912161	70.73756067961165	86.55952380952381	0.0034965034965034965	0.012496611282225482
BLCA	Hyper	chr5	15499895	15500913	7	21.0226702331418	31.17233009708738	10.149659863945578	2.913752913752914e-4	0.0018689050541523299
BLCA	Hypo	chr5	15501678	16175867	36	-30.7408916371295	43.47471682847896	74.21560846560847	1.363189914591203e-7	3.2294517728953203e-6
BLCA	Hyper	chr5	16179012	16180419	17	35.78551032063311	49.76870359794403	13.983193277310924	1.7140852495670842e-9	6.976691664727302e-8
BLCA	Hypo	chr5	17255115	17670475	42	-12.545285428087093	68.40822931114194	80.95351473922902	2.1303837769553734e-5	2.1969941591998003e-4
BLCA	Hypo	chr5	17925497	21456176	35	-15.315474539330296	44.10901525658807	59.42448979591837	0.007519005575695804	0.022867730560038255
BLCA	Hypo	chr5	21802422	24488076	34	-20.517184058089256	45.050042832667046	65.5672268907563	1.0860976493596426e-4	8.294230751397191e-4
BLCA	Hypo	chr5	25190441	26881128	18	-20.88114501464016	58.30933117583603	79.19047619047619	2.8898202762883327e-4	0.0018689050541523299
BLCA	Hypo	chr5	27118846	31193494	29	-18.880055637923064	57.28414797455641	76.16420361247947	4.3056003612857866e-5	3.9082389044553783e-4
BLCA	Hypo	chr5	31214888	31414530	12	-23.00602943442749	57.704288025889966	80.71031746031746	7.163048285675827e-4	0.0038207282218326605
BLCA	Hypo	chr5	31731391	32125529	35	-13.553239548246484	53.626352288488214	67.1795918367347	0.0038270527399352763	0.013545146885284336
BLCA	Hyper	chr5	32711095	32713723	12	23.280869548466637	34.860234627831716	11.579365079365079	1.6641051773640275e-5	1.8087688660780595e-4
BLCA	Hypo	chr5	32714010	33440240	24	-17.008211010941594	38.80329692556634	55.81150793650794	0.011489882384878695	0.03178618221586832
BLCA	Hypo	chr5	33501457	33890324	13	-25.196850883744087	48.36725168035848	73.56410256410257	0.0025358152414283793	0.00984477840051241
BLCA	Hyper	chr5	33936362	33938909	12	16.914123901987978	40.44983818770226	23.535714285714285	9.1488804639969e-4	0.004696992715425895
BLCA	Hypo	chr5	33946698	34006894	14	-9.938296677894458	69.50728155339806	79.44557823129252	0.013697770997542165	0.035724384346691423
BLCA	Hypo	chr5	35028916	35430306	27	-16.259884248557388	41.68015102481122	57.94003527336861	0.011284841064235052	0.03127548128342145
BLCA	Hypo	chr5	35852286	35946266	17	-20.499830029099016	38.119217589948605	58.61904761904762	0.01571128997076465	0.03967311545959254
BLCA	Hyper	chr5	38257516	38259243	16	11.957054727230698	24.90943567961165	12.952380952380953	4.342680352623049e-5	3.9308634217701677e-4
BLCA	Hypo	chr5	38259398	38462493	17	-22.172887601642596	50.342518560822384	72.51540616246498	3.230150800677931e-4	0.0020332429979766876
BLCA	Hypo	chr5	38591594	38796759	16	-17.454309697179845	59.64092839805825	77.0952380952381	0.002556672993441027	0.009915692724688667
BLCA	Hypo	chr5	40933444	41509352	19	-10.85735576806093	68.24540112416965	79.10275689223057	0.0011108899122150562	0.005240770412003459
BLCA	Hyper	chr5	41509849	41510325	6	20.8917591308368	43.12985436893204	22.238095238095237	0.012987012987012988	0.034537751405221286
BLCA	Hyper	chr5	42949542	42950152	6	23.807135151795347	46.457928802588995	22.65079365079365	0.0010822510822510823	0.005118285093563215
BLCA	Hyper	chr5	42951192	42954090	10	29.5456195099399	54.407524271844665	24.86190476190476	0.0025980211738725672	0.010015142580590873
BLCA	Hyper	chr5	42993978	42995527	9	33.46077978116813	54.413160733549084	20.952380952380953	2.8493610102846794e-4	0.0018651249316251812
BLCA	Hyper	chr5	43034043	43038611	11	18.275858445761358	77.05075022065313	58.77489177489178	0.0012233638394629107	0.00559879192558026
BLCA	Hypo	chr5	44911232	45694523	11	-28.54782919346026	37.898058252427184	66.44588744588745	0.003317116320212295	0.01219143807985806
BLCA	Hyper	chr5	45695241	45696592	10	18.997306981044844	35.62111650485437	16.623809523809523	2.165017644893806e-5	2.2059540637453268e-4
BLCA	Hyper	chr5	50678451	50679817	16	18.183628062875634	32.921723300970875	14.738095238095239	6.205492746153305e-7	1.1782737095177441e-5
BLCA	Hypo	chr5	53240482	53409045	12	-5.958256279858221	80.7123786407767	86.67063492063492	0.014210348811237223	0.03653816838158173
BLCA	Hypo	chr5	54180170	54409072	26	-14.906282229097764	46.60287528005975	61.50915750915751	0.008012097854991428	0.023929965958780018
BLCA	Hyper	chr5	54516372	54521833	19	24.27932695817213	57.5725600408789	33.29323308270677	4.566136524350966e-5	4.091343874043746e-4
BLCA	Hypo	chr5	56508803	56894899	35	-11.540443167558285	66.33030513176145	77.87074829931973	0.0029922115132523137	0.01117988403291343
BLCA	Hyper	chr5	63255045	63257885	19	14.607872837433389	29.630429228410833	15.022556390977444	3.932634391598458e-9	1.3740875965530318e-7
BLCA	Hyper	chr5	71014761	71015523	9	18.45886628653619	38.43770226537217	19.978835978835978	0.002817770464829288	0.010626702610583398
BLCA	Hypo	chr5	71665888	71757960	20	-9.876935968562181	75.09211165048544	84.96904761904761	0.011359363992724733	0.03144784850663157
BLCA	Hyper	chr5	72526232	72529127	10	18.374410540915395	44.03155339805825	25.65714285714286	7.523436316005976e-4	0.003981281790461807
BLCA	Hyper	chr5	72593919	72599786	28	22.249075358298658	41.52288488210818	19.273809523809526	1.452735625719678e-8	4.272072442547811e-7
BLCA	Hyper	chr5	72674434	72678459	13	18.28714570219425	48.02707244212099	29.73992673992674	0.0014347249197161703	0.006360669226922442
BLCA	Hyper	chr5	72739768	72740748	7	27.836470510534312	45.98613037447989	18.14965986394558	0.00058275058275058275	0.0032219707075198407
BLCA	Hyper	chr5	75380303	75410147	7	16.162456244633773	32.33252427184466	16.170068027210885	0.00874125874125874	0.025413416370863178
BLCA	Hypo	chr5	75464408	75696047	12	-14.551182770842965	59.08373786407767	73.63492063492063	0.007246253544544029	0.022407088934956246
BLCA	Hypo	chr5	75737331	76007292	21	-13.313585628426129	57.965325936199726	71.27891156462584	0.004628450657766841	0.015574716109600647
BLCA	Hyper	chr5	76928406	76939501	31	21.321264522094463	42.11235515189477	20.79109062980031	3.2234360638041805e-9	1.1858525365494995e-7
BLCA	Hyper	chr5	77253378	77255129	7	26.995987715474538	58.62864077669903	31.632653061224488	0.013111888111888112	0.034537751405221286
BLCA	Hyper	chr5	78365255	78366076	6	24.62436430883033	66.86245954692556	42.23809523809524	0.004329004329004329	0.014748682602645202
BLCA	Hypo	chr5	80272559	80521615	20	-12.099404761904761	64.1125	76.21190476190476	0.0016054653163518086	0.006913348677953877
BLCA	Hyper	chr5	87439075	87440296	6	26.772923408845738	52.32847896440129	25.555555555555557	0.012987012987012988	0.034537751405221286
BLCA	Hypo	chr5	87880065	87953794	8	-18.173442556634306	54.53489077669903	72.70833333333333	0.014063714063714063	0.036270825755153356
BLCA	Hyper	chr5	87959611	87975812	43	20.18800331150749	38.14924362158501	17.961240310077518	3.406370817592995e-9	1.2237347181324694e-7
BLCA	Hyper	chr5	87979005	87986067	25	16.825885344429032	33.14398058252427	16.31809523809524	3.454615180689311e-10	1.7277591740284058e-8
BLCA	Hyper	chr5	87990082	87991388	7	20.3597351561984	38.04680998613038	17.687074829931973	0.0020396270396270395	0.008427227919668524
BLCA	Hypo	chr5	87997901	88027558	7	-27.030331550095767	61.85402219140083	88.8843537414966	2.913752913752914e-4	0.0018689050541523299
BLCA	Hypo	chr5	88188704	89663024	17	-20.22725789344864	56.37778412335808	76.60504201680672	2.2111497856954144e-4	0.0015039749475681166
BLCA	Hypo	chr5	89858378	90575459	24	-11.914889620896904	59.31725323624595	71.23214285714286	0.01197553503971733	0.03278597285292201
BLCA	Hypo	chr5	93512716	93905343	19	-9.577645570236271	78.34466019417475	87.92230576441102	3.4857784821512637e-4	0.0021632746914372644
BLCA	Hyper	chr5	95767724	95769079	12	17.939407073509017	34.05845469255664	16.11904761904762	1.0058591294289236e-4	7.8619346868132e-4
BLCA	Hypo	chr5	96789385	98088946	22	-16.533486739797418	53.45785525154457	69.991341991342	0.003961229808442196	0.013904280043210865
BLCA	Hypo	chr5	98396620	99869840	14	-10.542855491711249	71.63401525658807	82.17687074829932	0.00927700752307025	0.026677061843868304
BLCA	Hypo	chr5	102895791	106724064	26	-8.314191471958463	64.72610156833458	73.04029304029304	0.009810922603905247	0.027732981073174342
BLCA	Hypo	chr5	109200659	109962391	13	-14.382223763291725	75.73132935026139	90.11355311355311	2.4652423898621236e-4	0.001646561039350413
BLCA	Hypo	chr5	110886711	111071312	10	-20.057200647249193	54.609466019417475	74.66666666666667	0.008607768731307905	0.025413416370863178
BLCA	Hypo	chr5	113394591	113692686	7	-17.960554124562446	64.33876560332871	82.29931972789116	0.013111888111888112	0.034537751405221286
BLCA	Hypo	chr5	113699683	114499431	15	-18.636746802280783	54.31245954692557	72.94920634920635	0.006399515670441353	0.020218453307273836
BLCA	Hyper	chr5	115151427	115152938	12	29.575136769918323	47.559263754045304	17.984126984126984	2.381623872471697e-4	0.0016099104127344015
BLCA	Hyper	chr5	115297488	115299646	14	22.80561884948154	47.625346740638	24.819727891156464	9.297896631319704e-6	1.1204331499662736e-4
BLCA	Hypo	chr5	116150282	118288521	14	-11.170943134535369	69.97191400832178	81.14285714285714	0.011461322478342383	0.03171864000154644
BLCA	Hypo	chr5	118918353	119214672	11	-17.604400453915016	71.20079435127978	88.8051948051948	3.8274419079372643e-4	0.0023336721497638204
BLCA	Hypo	chr5	119864497	121188228	14	-14.229979856020078	73.75641470180305	87.98639455782313	0.001243151214210576	0.005655525024458577
BLCA	Hyper	chr5	122429178	122434472	21	20.204786121568368	54.13222376329173	33.92743764172336	1.6527981145200468e-5	1.801597033092222e-4
BLCA	Hyper	chr5	122620929	122621645	6	16.985957004160888	31.36690938511327	14.380952380952381	0.012987012987012988	0.034537751405221286
BLCA	Hypo	chr5	124537511	124845866	12	-12.55129835105563	68.86933656957929	81.42063492063492	0.010244601273003482	0.028820473875375972
BLCA	Hyper	chr5	125930496	125931166	6	19.654646324549237	30.702265372168284	11.047619047619047	0.0010822510822510823	0.005118285093563215
BLCA	Hyper	chr5	126626298	126626719	8	16.66743238557559	33.77457524271845	17.107142857142858	0.0034965034965034965	0.012496611282225482
BLCA	Hypo	chr5	129987014	130331769	13	-21.93146093388812	62.5886855862584	84.52014652014653	1.3544905277898856e-4	0.0010052920968620955
BLCA	Hyper	chr5	134362967	134367394	20	29.400606796116506	56.400606796116506	27	4.860477849789645e-10	2.295825710283356e-8
BLCA	Hyper	chr5	134735544	134736598	10	21.734662505779013	64.28228155339806	42.547619047619044	0.009271688064257724	0.026677061843868304
BLCA	Hypo	chr5	134783075	134788649	10	-16.028213129912157	58.581310679611654	74.60952380952381	0.0057481218471930546	0.0183882225646828
BLCA	Hyper	chr5	134870506	134872315	23	15.475240708355948	29.259919797382864	13.784679089026914	1.7791736015853814e-6	2.8070590514085236e-5
BLCA	Hypo	chr5	135173201	135232157	15	-18.991978733240867	55.31278317152103	74.3047619047619	0.013177022170029536	0.03461399713184552
BLCA	Hyper	chr5	135265753	135266896	11	21.40958475181776	45.40092674315975	23.99134199134199	0.0012233638394629107	0.00559879192558026
BLCA	Hypo	chr5	135587300	135693111	9	-17.424436225407096	66.0782092772384	83.5026455026455	0.007095845331139449	0.022000570694440464
BLCA	Hypo	chr5	135913015	136833216	19	-21.860166192179477	53.76890648952478	75.62907268170426	2.4750755998035585e-5	2.471853103727942e-4
BLCA	Hypo	chr5	136836378	136984054	8	-20.11430883032825	52.87378640776699	72.98809523809524	0.018958818958818957	0.0457066423039958
BLCA	Hyper	chr5	140165998	140188119	32	15.218681374248728	61.61749089805825	46.398809523809526	0.0012314695171644692	0.005622437198891717
BLCA	Hyper	chr5	140202574	140209956	13	16.740895835556028	62.195108289768484	45.45421245421245	0.005987250735534489	0.019041746728308356
BLCA	Hyper	chr5	140221106	140237879	12	17.699809292649096	57.104571197411005	39.404761904761905	0.012092127821028078	0.03296364876612286
BLCA	Hyper	chr5	140242373	140257198	19	15.242973939703628	62.295605518650994	47.05263157894737	0.005425756788381928	0.017614718262494066
BLCA	Hyper	chr5	140261653	140306985	25	23.228058252427186	46.828058252427184	23.6	3.833818345287723e-6	5.412615863125767e-5
BLCA	Hyper	chr5	140474986	140482926	20	14.676826167360147	58.845873786407765	44.16904761904762	0.003997690944540101	0.014006561862463759
BLCA	Hyper	chr5	140531158	140537884	16	11.815367834026816	62.767748786407765	50.95238095238095	0.013726914362740135	0.03576382318818097
BLCA	Hyper	chr5	140559832	140564161	15	14.915418400369857	47.93446601941748	33.01904761904762	0.018358770820987854	0.04511281770141267
BLCA	Hyper	chr5	140615329	140627399	28	17.655678290733768	53.77132454923717	36.1156462585034	2.0666433806411794e-4	0.001419565094135216
BLCA	Hyper	chr5	140682911	140684147	12	18.810592926490983	82.10821197411003	63.29761904761905	0.0014570165330698378	0.006411207884445313
BLCA	Hyper	chr5	140712441	140723899	26	16.41773800633024	55.39759148618372	38.97985347985348	0.0012271821715667552	0.005609556736456876
BLCA	Hyper	chr5	140730469	140755938	68	16.162978298115362	56.6041547687036	40.44117647058824	8.532371166459056e-7	1.5326221635151338e-5
BLCA	Hyper	chr5	140762229	140774660	44	19.102383053839365	54.625110326566634	35.52272727272727	1.2104281039557045e-8	3.632233667242765e-7
BLCA	Hyper	chr5	140777473	140794993	47	19.782084575205833	55.14986573022103	35.367781155015194	1.358208571597972e-7	3.227643475114187e-6
BLCA	Hyper	chr5	140796240	140803130	33	23.976544221689853	57.939026184171816	33.96248196248196	1.901717386425593e-7	4.3214138888154075e-6
BLCA	Hyper	chr5	140807225	140812558	26	25.714263487321738	60.11902539208364	34.404761904761905	2.1248590846881533e-9	8.468448810434244e-8
BLCA	Hyper	chr5	140864020	140865433	10	19.299306518723995	48.213592233009706	28.914285714285715	5.25016778886748e-4	0.0030093096569598467
BLCA	Hypo	chr5	142533989	142757312	17	-11.91143836175247	68.9288977727013	80.84033613445378	0.010497640736262331	0.029306073299481705
BLCA	Hypo	chr5	142786405	143009741	15	-17.462328556017876	55.10275080906149	72.56507936507937	0.01647182084912136	0.041338921986709305
BLCA	Hypo	chr5	143093639	143521702	21	-16.936557470884793	58.170018492834025	75.10657596371883	8.315847077519053e-4	0.004343540057145105
BLCA	Hypo	chr5	143588059	143883482	8	-18.43947931114193	59.036711165048544	77.47619047619048	0.0014763014763014763	0.0064478646670427485
BLCA	Hyper	chr5	145718965	145722909	14	16.6075804108051	32.47832871012483	15.870748299319727	7.495985259410886e-5	6.241032035995886e-4
BLCA	Hypo	chr5	146891173	147715012	53	-10.604458343146748	62.89329547536179	73.49775381850854	3.2990287968996787e-4	0.0020623147991646264
BLCA	Hypo	chr5	148741481	148761738	13	-7.291457733205307	66.37154592979836	73.66300366300366	0.019347249197161704	0.046511200394810354
BLCA	Hypo	chr5	149540235	149569276	19	-14.31303379808745	62.40125191619826	76.71428571428571	0.002309154048526298	0.00918462935763555
BLCA	Hypo	chr5	149588987	149669813	21	-12.380567113576822	45.55594082293111	57.93650793650794	0.016793389684088313	0.0418317746595474
BLCA	Hyper	chr5	151055650	151066730	9	17.440707350901526	40.34546925566343	22.904761904761905	0.007095845331139449	0.022000570694440464
BLCA	Hypo	chr5	151328029	153338888	37	-20.0397346028414	46.72474416163737	66.76447876447877	8.433932460566621e-6	1.0309337250520093e-4
BLCA	Hypo	chr5	154393265	155106467	11	-21.22758794603455	30.642541924095323	51.87012987012987	0.002618253779244491	0.010048189966056203
BLCA	Hyper	chr5	155107529	155109505	10	18.37672214516875	36.15291262135922	17.776190476190475	2.4356448505055315e-4	0.0016377464319919442
BLCA	Hypo	chr5	155112641	155701819	7	-28.099778746450035	48.74375866851595	76.84353741496598	0.00874125874125874	0.025413416370863178
BLCA	Hypo	chr5	155794596	156273969	18	-23.87132711768634	57.40115965480043	81.27248677248677	7.986657785697145e-7	1.4481968098614824e-5
BLCA	Hypo	chr5	156277860	156569687	22	-15.139689194300846	50.671999117387465	65.81168831168831	0.00805954064157634	0.02406227272311438
BLCA	Hypo	chr5	156589436	156642345	10	-22.080097087378643	47.51990291262136	69.60000000000001	0.017731494511680268	0.04366958352216846
BLCA	Hyper	chr5	156955280	157001698	7	18.231160425335183	56.42163661581137	38.19047619047619	0.005536130536130536	0.017836829836829837
BLCA	Hyper	chr5	157098080	157099032	9	19.816330199825348	35.77400215749731	15.957671957671957	0.0023483760975352235	0.0092484682955942
BLCA	Hypo	chr5	157413683	158477707	36	-25.360070889197104	49.95738942826321	75.31746031746032	1.8384727182947496e-7	4.2119740240692884e-6
BLCA	Hypo	chr5	159890925	160972931	34	-12.133437355524736	56.8217447173044	68.95518207282913	0.005145597852914111	0.017054697240480313
BLCA	Hyper	chr5	161274488	161275954	16	12.17803687008784	23.80006067961165	11.62202380952381	8.238920616285475e-4	0.004307328512669213
BLCA	Hypo	chr5	162943755	166402453	42	-17.20039957730665	45.996879334257976	63.197278911564624	0.0013046701432865653	0.005911757169362486
BLCA	Hypo	chr5	166408484	167181836	40	-24.758576051779936	45.8747572815534	70.63333333333334	1.564761298607307e-6	2.5260661301567748e-5
BLCA	Hypo	chr5	167219531	167674742	28	-19.091110230499968	54.46671289875173	73.5578231292517	1.4900124211661715e-4	0.0010848311176749328
BLCA	Hypo	chr5	168093430	168430206	36	-11.909648379308575	71.05596008629989	82.96560846560847	2.5734054899803034e-5	2.5540465381750045e-4
BLCA	Hypo	chr5	169096691	169817797	93	-18.500515761164056	47.950073076521555	66.45058883768561	1.2209547958363701e-9	5.219411227787656e-8
BLCA	Hypo	chr5	170173410	170285840	14	-14.352197675186579	69.1614077669903	83.51360544217687	0.004116607401419832	0.014396837219225116
BLCA	Hyper	chr5	170735186	170745466	40	24.175913083680076	41.585436893203884	17.409523809523808	7.886483506778439e-12	6.034737179386861e-10
BLCA	Hyper	chr5	172658226	172661859	11	17.442483083259784	41.41218005295675	23.96969696969697	0.007884530330350765	0.023604235558624433
BLCA	Hyper	chr5	172669916	172673203	15	22.164763445831404	43.491747572815534	21.326984126984126	1.3273806853023437e-5	1.4915002942633677e-4
BLCA	Hypo	chr5	172757702	173021074	26	-13.175006223549913	53.46601941747573	66.64102564102564	0.00844144959744442	0.02504613118249116
BLCA	Hyper	chr5	174158984	174160335	6	11.057250732008013	64.75566343042071	53.698412698412696	0.007575757575757576	0.022867730560038255
BLCA	Hypo	chr5	175105562	175112799	11	-18.84393519102257	58.27294792586055	77.11688311688312	7.002801120448179e-4	0.003768314639498556
BLCA	Hypo	chr5	176208949	176233844	10	-16.3004160887656	52.12815533980583	68.42857142857143	0.017731494511680268	0.04366958352216846
BLCA	Hypo	chr5	176288498	176515533	78	-9.404552971300545	41.11193054518297	50.51648351648352	0.01418099134235873	0.03653816838158173
BLCA	Hypo	chr5	176518013	176524797	16	-13.255497283865001	69.75045509708738	83.00595238095238	0.00440139128178723	0.014935452810747622
BLCA	Hypo	chr5	177825282	177895047	19	-18.45448572888532	61.139499233520695	79.59398496240601	2.103854434946953e-4	0.00143909521601674
BLCA	Hypo	chr5	177915909	178002446	20	-20.681062182154417	56.837985436893206	77.51904761904763	5.206089889554608e-4	0.0029975169175975817
BLCA	Hyper	chr5	178367621	178368620	11	23.550928844618166	42.32149161518094	18.77056277056277	1.4175710770138016e-6	2.3177892908781214e-5
BLCA	Hypo	chr5	178371587	178420865	20	-16.47620203421174	68.3618932038835	84.83809523809524	1.2456062656768756e-5	1.4204737920952984e-4
BLCA	Hyper	chr5	178421314	178422260	7	23.81282610131431	41.744798890429955	17.931972789115648	0.0010703548657925608	0.005118285093563215
BLCA	Hypo	chr5	178489201	178593785	27	-14.456743035221999	66.30339805825243	80.76014109347443	0.0010366958845268294	0.005118285093563215
BLCA	Hypo	chr5	178594649	178736443	42	-16.754056315082668	57.9001386962552	74.65419501133788	1.7549840565495203e-5	1.8808316527614744e-4
BLCA	Hypo	chr5	178773355	178956931	41	-19.960829584023994	57.31559318020365	77.27642276422765	9.27275012109774e-8	2.2864570983420138e-6
BLCA	Hyper	chr5	179218853	179221090	9	20.165652129244364	60.82173678532902	40.65608465608466	0.009378856437679967	0.026748792195723854
BLCA	Hypo	chr5	179564602	179634383	22	-11.416782246879334	58.50529567519859	69.92207792207792	0.0075294037306071464	0.022867730560038255
BLCA	Hypo	chr5	180021235	180074878	47	-17.879801497132625	55.677442677132824	73.55724417426545	2.097998035628338e-8	5.945881840232608e-7
BLCA	Hyper	chr5	180075862	180101143	10	17.029727230698104	34.51067961165049	17.48095238095238	0.004465348892593475	0.015092248112246144
BLCA	Hypo	chr5	180166492	180220005	14	-17.48686513440328	61.234223300970875	78.72108843537416	0.002880528260121745	0.01082071784312793
BLCA	Hypo	chr6	209712	290800	13	-13.24808848109819	65.1292008961912	78.37728937728937	0.019347249197161704	0.046511200394810354
BLCA	Hypo	chr6	317607	387276	34	-15.63030309211063	63.62599942889777	79.25630252100841	1.134677009054562e-5	1.311563213487237e-4
BLCA	Hyper	chr6	391114	393616	12	29.876175065495453	40.41585760517799	10.53968253968254	4.437613806304074e-6	6.020677454935953e-5
BLCA	Hypo	chr6	394966	467810	24	-18.604070349822777	56.21338996763754	74.81746031746032	0.0011770860106264799	0.005432511287721274
BLCA	Hypo	chr6	775386	792749	11	-13.220726684318915	76.44593998234775	89.66666666666667	0.0015905147484094853	0.006864421237918433
BLCA	Hyper	chr6	1383982	1389367	15	12.671590383726306	52.83349514563107	40.161904761904765	0.007259586151196848	0.022426464767443796
BLCA	Hypo	chr6	1416762	1523823	17	-11.090206956569036	67.82295830953741	78.91316526610645	0.001466563197624662	0.0064478646670427485
BLCA	Hypo	chr6	1581740	1598984	20	-14.612592464170135	53.23264563106796	67.8452380952381	0.015205628019382434	0.03879742100844094
BLCA	Hyper	chr6	1635578	1635847	6	19.65391431653568	81.45550161812298	61.8015873015873	0.007575757575757576	0.022867730560038255
BLCA	Hypo	chr6	2637301	2751402	23	-13.16630485034875	70.3885605740819	83.55486542443064	4.900350596835695e-4	0.0028558631201056157
BLCA	Hypo	chr6	3845637	3849028	8	-13.895342117429497	61.807038834951456	75.70238095238095	0.005205905205905206	0.017054697240480313
BLCA	Hyper	chr6	3849095	3850738	26	7.6907295778655	57.220033607169526	49.52930402930403	1.2810071614856932e-4	9.619496368683538e-4
BLCA	Hyper	chr6	5994235	5996412	14	17.958506703652336	42.26803051317614	24.30952380952381	0.001243151214210576	0.005655525024458577
BLCA	Hyper	chr6	5999186	6009556	41	20.847338272273152	39.06452758702344	18.21718931475029	1.1036208170008655e-9	4.80237787685115e-8
BLCA	Hypo	chr6	6614072	6688847	11	-23.917885512545705	46.822374227714036	70.74025974025975	7.002801120448179e-4	0.003768314639498556
BLCA	Hypo	chr6	7731069	7833720	8	-22.687427762367083	52.050667475728154	74.73809523809524	0.0034965034965034965	0.012496611282225482
BLCA	Hypo	chr6	9865260	10033784	8	-16.35497572815534	64.02002427184466	80375	0.018958818958818957	0.0457066423039958
BLCA	Hyper	chr6	10381196	10383164	11	21.34046778464254	55.34046778464254	34	0.0015905147484094853	0.006864421237918433
BLCA	Hyper	chr6	10385126	10399046	26	31.750809061488674	61.68670649738611	29.935897435897438	3.497995910109558e-9	1.2449611490306203e-7
BLCA	Hyper	chr6	10421372	10426099	13	29.62181265336605	51.654779686333086	22.032967032967033	1.8268176835951773e-6	2.8645100235389952e-5
BLCA	Hyper	chr6	10881782	10884891	23	29.505673480873988	50.640249050232164	21.134575569358176	4.530310782231206e-11	2.913104042490184e-9
BLCA	Hyper	chr6	10886967	10888129	11	20.12697011726138	36.98411297440423	16.857142857142858	9.299266265210538e-4	0.004696992715425895
BLCA	Hypo	chr6	11765265	11988741	25	-12.560790568654646	60.393495145631064	72.95428571428572	0.008502309388158848	0.025177891423448725
BLCA	Hypo	chr6	12602989	12748001	14	-19.085025757875968	46.95579056865464	66.04081632653062	0.01551260575422643	0.03946225373382335
BLCA	Hypo	chr6	13012998	13274354	20	-18.23729773462783	36.82936893203883	55.06666666666666	0.0016054653163518086	0.006913348677953877
BLCA	Hypo	chr6	14456911	15170709	50	-10.909431345353676	66.06485436893203	76.97428571428571	6.047115535166728e-4	0.0033289588543234387
BLCA	Hypo	chr6	16818211	17045947	13	-15.681256445819551	49.282113517550414	64.96336996336996	0.015611679986872915	0.039648382097428325
BLCA	Hypo	chr6	18280398	19688777	41	-11.878863480035632	44.65539900544636	56.534262485481996	0.020908650067331804	0.04860054383816008
BLCA	Hyper	chr6	19691654	19692418	6	13.716770688858066	32.85962783171521	19.142857142857142	0.020562770562770564	0.04785472029997578
BLCA	Hypo	chr6	22190121	22367352	17	-10.13256370509369	73.99628783552255	84.12885154061625	0.002125125463541146	0.008654316150620994
BLCA	Hypo	chr6	22571177	22737718	11	-16.86719833564494	66.5743601059135	83.44155844155844	0.002618253779244491	0.010048189966056203
BLCA	Hypo	chr6	24832728	24903167	13	-19.423957110850314	56.2903286034354	75.71428571428571	0.004300521123781321	0.014748682602645202
BLCA	Hypo	chr6	25655241	25729805	14	-17.133297008123638	67.73404993065188	84.86734693877551	0.0010387719796792348	0.005118285093563215
BLCA	Hypo	chr6	25733243	25881093	18	-20.569412338829817	55.86974110032362	76.43915343915344	9.2428814807863e-4	0.004696992715425895
BLCA	Hypo	chr6	25899832	25931659	9	-21.787037037037035	60.361111111111114	82.14814814814815	9.255450431921019e-4	0.004696992715425895
BLCA	Hyper	chr6	26225258	26226256	9	16.910540915395284	75.60895361380798	58.698412698412696	0.019991772932949403	0.04740711977198525
BLCA	Hyper	chr6	26240307	26240939	8	35.787375751271384	53.85285194174757	18.06547619047619	0.0034965034965034965	0.012496611282225482
BLCA	Hypo	chr6	26601993	26613334	7	-8.620467604517533	78.46116504854369	87.08163265306122	0.013111888111888112	0.034537751405221286
BLCA	Hyper	chr6	26697915	26758750	12	20.827236477115118	43.815331715210355	22.988095238095237	3.587071160095793e-5	3.359641189357773e-4
BLCA	Hyper	chr6	27235820	27236425	6	29.569078440437664	56.75161812297735	27.182539682539684	0.007575757575757576	0.022867730560038255
BLCA	Hyper	chr6	27258466	27259237	10	22.61820388349515	46.11820388349515	23.5	2.4356448505055315e-4	0.0016377464319919442
BLCA	Hyper	chr6	27511112	27513479	10	26.061696717521958	46.71407766990291	20.652380952380952	0.0010446210136612613	0.005118285093563215
BLCA	Hyper	chr6	27525713	27561058	11	23.312518387761106	41.373124448367165	18.06060606060606	0.0012233638394629107	0.00559879192558026
BLCA	Hyper	chr6	27647713	27648605	8	37.40557096625058	56.04247572815534	18.636904761904763	1.554001554001554e-4	0.0011152038051129875
BLCA	Hyper	chr6	27858279	27860727	6	25.33485513946679	35.35072815533981	10.015873015873016	0.020562770562770564	0.04785472029997578
BLCA	Hypo	chr6	27880822	28041663	6	-15.018319463707813	70.93406148867314	85.95238095238095	0.012987012987012988	0.034537751405221286
BLCA	Hyper	chr6	28058715	28058973	9	25.735526788924847	69.80960086299892	44.074074074074076	0.002817770464829288	0.010626702610583398
BLCA	Hyper	chr6	28174875	28176230	8	27.097000693481277	41.18628640776699	14.089285714285714	0.0014763014763014763	0.0064478646670427485
BLCA	Hyper	chr6	28226885	28227482	11	29.7338818139789	65.3356134157105	35.6017316017316	0.00019704237970491842	0.001365732146288076
BLCA	Hyper	chr6	28367279	28367898	9	27.983805927980686	39.941477885652645	11.957671957671959	2.0567667626491154e-5	2.1296859631652276e-4
BLCA	Hyper	chr6	28457210	28458328	8	19.211396208969024	33.22330097087379	14.011904761904761	9.324009324009324e-4	0.004696992715425895
BLCA	Hypo	chr6	28460106	28502727	47	-18.00635937085018	56.58634579632307	74.59270516717325	3.2884365918908347e-6	4.721035047119825e-5
BLCA	Hyper	chr6	28557047	28558113	22	20.676265077964107	44.64596204766108	23.96969696969697	4.427738600055584e-5	3.9907015038427953e-4
BLCA	Hyper	chr6	28583971	28584288	15	18.678440437663742	62.81812297734628	44.13968253968254	4.409559925919393e-6	6.020677454935953e-5
BLCA	Hyper	chr6	28601269	28603779	50	10.654248728617661	38.898058252427184	28.243809523809524	2.342468846422674e-5	2.3647192101353958e-4
BLCA	Hyper	chr6	28661199	28710807	19	15.364649487797163	43.775677056719466	28.411027568922304	0.0013779116850161973	0.006148521346600577
BLCA	Hyper	chr6	28733532	28762125	16	16.731333795654184	38.45752427184466	21.726190476190474	1.3747246021451475e-4	0.001015621261087869
BLCA	Hyper	chr6	28778091	28793656	23	15.349559790146536	33.19428028704095	17.84472049689441	4.2015200340165745e-5	3.83194651970141e-4
BLCA	Hyper	chr6	28921469	28922226	8	22.8981304900601	47.38622572815534	24.488095238095237	0.002331002331002331	0.009198983928225806
BLCA	Hyper	chr6	28956226	28956731	17	33.81358951347529	62.34580239862935	28.53221288515406	3.52017002981296e-7	7.4000937000353764e-6
BLCA	Hypo	chr6	28960369	28971967	36	-11.333500282529407	76.00512405609493	87.33862433862434	9.500689589935863e-8	2.3301050237881163e-6
BLCA	Hypo	chr6	28980392	29395950	90	-18.875950326193045	46.00288565264293	64.87883597883598	3.8041950855857845e-7	7.78334245853006e-6
BLCA	Hypo	chr6	29407689	29518072	58	-22.54323497058683	55.35085369936391	77.89408866995073	2.36657928336187e-11	1.5747012761986982e-9
BLCA	Hyper	chr6	29520965	29521803	35	25.18678422825441	38.74188626907073	13.555102040816326	1.7777743172240996e-12	1.478644464717262e-10
BLCA	Hypo	chr6	29523592	29594830	129	-14.968176018808215	66.22599157070822	81.19416758951643	1.567138665254169e-17	2.8551773967916436e-15
BLCA	Hyper	chr6	29595002	29595661	13	17.960809417120096	47.40403286034354	29.44322344322344	0.008204334365325078	0.02441834561006126
BLCA	Hypo	chr6	29635347	29644756	19	-19.768869990510254	52.29879918242207	72.06766917293233	8.909050213398039e-4	0.004615575642039391
BLCA	Hypo	chr6	29694676	29714043	29	-12.020433784494713	64.69877803816539	76.7192118226601	0.0022734286145470644	0.009060560290892779
BLCA	Hyper	chr6	29759804	29760832	25	15.886925566343043	30.23359223300971	14.346666666666666	8.254157063150552e-6	1.0121924655004491e-4
BLCA	Hypo	chr6	29760897	29794843	12	-10.707688010479277	72.58596278317152	83.2936507936508	0.006046988413390353	0.01919185206937494
BLCA	Hyper	chr6	29795350	29796593	26	16.54019968704435	48.538368185212846	31.998168498168496	4.045347512471241e-4	0.002439322235258466
BLCA	Hyper	chr6	29943188	29943677	8	25.962205270457698	46.765776699029125	20.80357142857143	7.77000777000777e-5	6.345368138324382e-4
BLCA	Hyper	chr6	30038754	30039600	32	22.87505056634304	78.8229672330097	55.947916666666664	6.575418126109655e-8	1.6660628973838105e-6
BLCA	Hypo	chr6	30080189	30092001	8	-21.65905282015719	52.22785194174757	73.88690476190476	0.0034965034965034965	0.012496611282225482
BLCA	Hyper	chr6	30094947	30095802	29	26.10188595022877	64.84901238701038	38.747126436781606	9.738805656497283e-7	1.689826323889279e-5
BLCA	Hypo	chr6	30099252	30127760	72	-16.735467393537782	53.24733683926645	69.98280423280423	8.022758491235997e-8	2.00621398610908e-6
BLCA	Hypo	chr6	30128511	30138762	50	-15.852595931576513	54.35121359223301	70.20380952380953	4.703791726546185e-5	4.190153002506567e-4
BLCA	Hyper	chr6	30228007	30228431	16	16.741454288025892	41.13728762135922	24.395833333333332	0.0014918254112399173	0.006478687881275737
BLCA	Hyper	chr6	30652647	30653799	16	14.680355698104485	46.820236650485434	32.13988095238095	3.2673998897219053e-4	0.0020510372400452848
BLCA	Hypo	chr6	30850405	30854551	45	-11.380192119997945	21.128802588996763	32.508994708994706	9.454288434577596e-4	0.004753233580905898
BLCA	Hypo	chr6	30904694	31010742	80	-12.414284269533056	47.304763349514566	59.71904761904762	6.490548575242493e-4	0.003532409509086455
BLCA	Hypo	chr6	31023257	31039180	15	-19.326968716289105	54.91747572815534	74.24444444444444	0.00246981127599255	0.009637427783730237
BLCA	Hypo	chr6	31079110	31080529	9	-11.599951199465766	75.51645091693635	87.11640211640211	0.0038872891814068283	0.013694998534127555
BLCA	Hypo	chr6	31082631	31110228	53	-16.21719266567224	47.42521524088661	63.64240790655885	1.332552210540613e-4	9.947989770787095e-4
BLCA	Hyper	chr6	31148332	31148666	13	12.309683843664425	75.95070948469007	63.64102564102564	6.441936042151415e-6	8.172985920672996e-5
BLCA	Hypo	chr6	31540169	31547704	38	-11.347853857945836	51.33635666836995	62.68421052631579	0.011293835358806192	0.031289076091812085
BLCA	Hyper	chr6	31650735	31651362	20	16.982229542302356	61.86080097087378	44.878571428571426	1.9494433577714517e-5	2.060378532274468e-4
BLCA	Hypo	chr6	31685430	31690170	19	-19.071550234810328	50.5725600408789	69.64411027568923	4.4457673562476e-4	0.002637668657413646
BLCA	Hyper	chr6	31695027	31696867	35	14.324222310283336	74.01809986130374	59.69387755102041	3.019141963176987e-4	0.0019348805948266588
BLCA	Hyper	chr6	31733799	31734580	17	12.245764325147537	67.46145059965734	55.21568627450981	0.011883150534283373	0.03255502048555959
BLCA	Hypo	chr6	31735435	31744927	38	-13.615856996861083	44.756323454266735	58.37218045112782	0.012286232799050186	0.03333838772281277
BLCA	Hyper	chr6	31782711	31783545	25	23.602112806287565	30.445922330097087	6.843809523809524	7.065511850336117e-10	3.218172421355474e-8
BLCA	Hypo	chr6	31832850	31833452	11	-18.361503383348044	60.214254192409534	78.57575757575758	0.0015905147484094853	0.006864421237918433
BLCA	Hypo	chr6	31870476	31914305	29	-10.38901509716709	47.45170739872782	57.84072249589491	0.018969379752828343	0.045717698856265344
BLCA	Hypo	chr6	31963526	32016473	103	-14.757155873943507	49.346403996606654	64.10355987055016	1.8003779673730482e-7	4.149545845282701e-6
BLCA	Hypo	chr6	32017079	32038541	129	-15.79718091797568	64.52397079852487	80.32115171650055	3.39765221925704e-18	7.221898550487463e-16
BLCA	Hypo	chr6	32039796	32043739	21	-14.50669814851507	64.03525196486362	78.54195011337869	4.058497058259962e-4	0.002445324369276002
BLCA	Hypo	chr6	32051857	32064032	97	-14.559980172631558	51.178360524472026	65.73834069710358	1.8713804868695347e-7	4.274568204634531e-6
BLCA	Hypo	chr6	32064692	32075763	26	-14.395488815391728	45.881067961165044	60.276556776556774	0.0016865662194147642	0.007230030650398753
BLCA	Hypo	chr6	32076967	32078624	17	-11.877199423458702	26.93232438606511	38.80952380952381	0.006566839097559444	0.020644803933658532
BLCA	Hyper	chr6	32115964	32117401	33	12.705477101108169	69.29133568696676	56.58585858585859	1.7305010007506903e-4	0.00122269562860058
BLCA	Hyper	chr6	32118204	32120203	25	17.974128525196488	59.661747572815536	41.68761904761905	4.0730726883549965e-5	3.7370686104667186e-4
BLCA	Hypo	chr6	32166206	32304143	150	-13.849550007705348	60.140291262135925	73.98984126984126	1.608373417218422e-11	1.1395623507921634e-9
BLCA	Hypo	chr6	32306373	32522535	88	-16.58961406716261	54.16742056487202	70.75703463203463	6.412616301414854e-9	2.1081341876052879e-7
BLCA	Hypo	chr6	32578070	32727265	29	-21.292182792099094	50.0526447941078	71.34482758620689	5.089798335686283e-6	6.761655705672125e-5
BLCA	Hyper	chr6	32729442	32729720	14	12.190368865992998	70.71757975034674	58.52721088435374	0.017522496921473903	0.043369714250588075
BLCA	Hypo	chr6	32729741	32757870	19	-18.815667810302454	59.795861011752685	78.61152882205513	7.106264121304988e-4	0.0038105909639961997
BLCA	Hyper	chr6	32847527	32847845	16	11.522176953305596	70.55491504854369	59.032738095238095	0.0014918254112399173	0.006478687881275737
BLCA	Hypo	chr6	32948204	32975702	36	-14.37323740175682	59.408508629989214	73.78174603174604	3.8175941292705715e-4	0.0023332452298065825
BLCA	Hypo	chr6	32976049	32976897	6	-19.84024888272461	39.19943365695793	59.03968253968254	0.012987012987012988	0.034537751405221286
BLCA	Hypo	chr6	32978129	33047056	35	-14.30577901063338	50.189459084604714	64.4952380952381	0.006278195993292501	0.019884418766835353
BLCA	Hyper	chr6	33048254	33048879	12	13.405108645399908	53.55987055016181	40.154761904761905	0.006002117295925363	0.019081097444296168
BLCA	Hypo	chr6	33092802	33159572	219	-16.276851025022324	52.340891962583676	68.61774298760601	2.1157656422794935e-17	3.4446465307920604e-15
BLCA	Hypo	chr6	33389072	33391615	18	-10.305273026146812	73.9037216828479	84.20899470899471	0.0058587289602172665	0.018702959534243856
BLCA	Hypo	chr6	33760988	33926023	75	-17.432607489597782	53.613106796116504	71.04571428571428	2.7378219492775597e-8	7.61811402031705e-7
BLCA	Hypo	chr6	33947308	33969111	7	-17.91007859454462	63.042302357836334	80.95238095238095	0.00874125874125874	0.025413416370863178
BLCA	Hypo	chr6	33989844	34105785	51	-15.493155838387136	53.810298876832285	69.30345471521942	3.3196693100881984e-5	3.1673453317699365e-4
BLCA	Hyper	chr6	35479350	35480129	6	24.312297734627833	47.31229773462783	23	0.012987012987012988	0.034537751405221286
BLCA	Hypo	chr6	38685753	39015339	16	-16.619119856680534	65.57433252427184	82.19345238095238	0.005377764861036308	0.017488591889778932
BLCA	Hypo	chr6	39283313	39690491	22	-19.999007060900265	51.228265666372465	71.22727272727273	8.441835505967064e-4	0.004400335510331061
BLCA	Hypo	chr6	40291048	40359130	16	-13.68356304900601	62.23012742718446	75.91369047619048	0.011715519449902533	0.03214311754415711
BLCA	Hypo	chr6	40360071	40512466	12	-15.37911272923409	66.48199838187702	81.86111111111111	0.006046988413390353	0.01919185206937494
BLCA	Hypo	chr6	41070479	41303596	49	-14.430571673884533	52.874578957796714	67.30515063168124	7.86625922598201e-4	0.004134108214094392
BLCA	Hyper	chr6	41341074	41343830	16	18.10540915395284	33.72148058252427	15.616071428571429	9.50172405391565e-5	7.511073601297785e-4
BLCA	Hyper	chr6	41528345	41528785	7	23.53127270325606	59.03467406380028	35.50340136054422	2.913752913752914e-4	0.0018689050541523299
BLCA	Hyper	chr6	41605994	41607326	9	20.799763702676323	49.932038834951456	29.132275132275133	0.009378856437679967	0.026748792195723854
BLCA	Hypo	chr6	43248039	43252541	9	-22.287704833821337	52.32605177993528	74.6137566137566	9.255450431921019e-4	0.004696992715425895
BLCA	Hyper	chr6	43612627	43613395	8	27.403244914470644	61.373483009708735	33.970238095238095	0.005205905205905206	0.017054697240480313
BLCA	Hypo	chr6	46703422	47272740	62	-10.614416953753	58.60601315377388	69.22043010752688	0.004782721683274895	0.01604278918457368
BLCA	Hyper	chr6	49681178	49681391	7	14.147661977412325	53.270110957004164	39.12244897959184	0.0011655011655011655	0.00541165953787313
BLCA	Hypo	chr6	49681742	50488809	23	-19.070016482743373	53.41652596032081	72.48654244306418	2.0223712966905297e-4	0.0013979390390493165
BLCA	Hyper	chr6	50674399	50676699	7	15.51292847235982	26.982316227461858	11.46938775510204	0.013111888111888112	0.034537751405221286
BLCA	Hyper	chr6	50784944	50810993	31	23.789066111881645	42.48645474475415	18.697388632872503	8.118932105383692e-11	4.74244797483939e-9
BLCA	Hyper	chr6	50812112	50817450	12	24.623025504700262	41.69842233009709	17.075396825396826	1.8221013646231064e-5	1.9473072125832417e-4
BLCA	Hypo	chr6	51342462	51815507	11	-15.094954398352456	62.38989408649603	77.48484848484848	0.0199877521858946	0.04740711977198525
BLCA	Hypo	chr6	51942952	52109347	28	-20.43933277194373	62.37699375866852	82.81632653061224	1.3331015366588392e-6	2.2321428793246033e-5
BLCA	Hyper	chr6	53530503	53530628	6	14.071601941747575	75.23826860841424	61.16666666666667	0.0010822510822510823	0.005118285093563215
BLCA	Hypo	chr6	53919041	55010127	30	-15.16561488673139	51.067718446601944	66.23333333333333	0.0031721978595267647	0.011737745658171568
BLCA	Hyper	chr6	55443757	55444335	9	13.767208609441619	34.48678532901834	20.719576719576718	0.012217194570135747	0.03317458227490374
BLCA	Hypo	chr6	57305889	57614321	8	-19.910237517337034	63.946905339805824	83.85714285714286	9.324009324009324e-4	0.004696992715425895
BLCA	Hyper	chr6	58142044	58148898	7	20.59452810250314	37.302011095700415	16.707482993197278	0.0011655011655011655	0.00541165953787313
BLCA	Hyper	chr6	62995523	62996664	12	17.783768685467717	28.50202265372168	10.718253968253968	7.39602301050679e-7	1.360441540298028e-5
BLCA	Hypo	chr6	64390047	68726169	30	-15.646659731853907	60.5628640776699	76.20952380952382	2.128240972896943e-4	0.0014527475401077082
BLCA	Hypo	chr6	70993107	71014153	8	-23.257931692094314	45.849211165048544	69.10714285714286	0.014063714063714063	0.036270825755153356
BLCA	Hyper	chr6	71666682	71667105	7	12.653457499504656	20.30651872399445	7.653061224489796	2.913752913752914e-4	0.0018689050541523299
BLCA	Hypo	chr6	71668029	71997462	10	-18.497237632917244	59.50752427184466	78.0047619047619	0.009271688064257724	0.026677061843868304
BLCA	Hypo	chr6	72004311	72126866	9	-18.277392510402215	58.21467098166127	76.4920634920635	0.015734265734265736	0.03967311545959254
BLCA	Hypo	chr6	72599091	72889437	6	-23.91583834180922	66.14765372168284	90.06349206349206	0.0010822510822510823	0.005118285093563215
BLCA	Hypo	chr6	72922399	73329475	14	-23.982241925896574	49.619798890429955	73.60204081632654	4.8568423046818523e-4	0.0028369891080477507
BLCA	Hyper	chr6	73331114	73332963	11	15.82535829865927	22.479037952338924	6.653679653679654	1.4175710770138016e-6	2.3177892908781214e-5
BLCA	Hypo	chr6	73334702	73972288	27	-19.52009811475831	58.532811938151745	78.05291005291005	4.213861363955353e-5	3.838627042498376e-4
BLCA	Hypo	chr6	74064434	74104097	35	-10.591767386566278	74.82864077669903	85.42040816326531	4.8200468037973445e-4	0.0028241193064821807
BLCA	Hypo	chr6	76696290	78166436	10	-22.125011558021267	51.93689320388349	74.06190476190476	0.007344822360302237	0.022521249793977068
BLCA	Hyper	chr6	78172192	78176806	18	14.51655365490317	28.85517799352751	14.338624338624339	0.001042795472151253	0.005118285093563215
BLCA	Hypo	chr6	84232599	84234463	9	-20.014164997174706	70.40911542610571	90.42328042328042	3.907856849033319e-4	0.002369486577559664
BLCA	Hyper	chr6	85472949	85476921	19	20.567955081879457	36.179483903934596	15.611528822055137	4.56748606867096e-6	6.153240034765877e-5
BLCA	Hyper	chr6	85482570	85484863	12	19.416050238865772	35.467637540453076	16.0515873015873	4.437613806304074e-6	6.020677454935953e-5
BLCA	Hypo	chr6	88776150	88873995	14	-18.028242850538273	67.88332177531207	85.91156462585033	6.540933179780938e-5	5.579846230956938e-4
BLCA	Hypo	chr6	88879038	89429663	18	-12.654363795140494	70.50701186623516	83.16137566137566	0.002588307856963852	0.010013008959295954
BLCA	Hypo	chr6	90598826	90661373	15	-21.401579596239788	55.325404530744336	76.72698412698412	9.316397579620125e-4	0.004696992715425895
BLCA	Hypo	chr6	91321677	92526316	21	-19.1915274200295	54.24838187702265	73.43990929705215	7.388594164344763e-4	0.003923492196083701
BLCA	Hypo	chr6	97009594	97282253	6	-16.793670057019572	72.7698220064725	89.56349206349206	0.0010822510822510823	0.005118285093563215
BLCA	Hyper	chr6	99271924	99273607	15	16.572229927569733	32.442071197411	15.86984126984127	1.753509210307127e-6	2.7780232872194897e-5
BLCA	Hyper	chr6	99289733	99291587	9	17.79046591667951	39.72168284789644	21.93121693121693	2.0567667626491154e-5	2.1296859631652276e-4
BLCA	Hyper	chr6	100050480	100061307	46	19.478532231803655	37.52511608273533	18.046583850931675	1.255242564448312e-11	9.137532777290822e-10
BLCA	Hyper	chr6	100441407	100442151	7	21.64374876164058	36.7253814147018	15.081632653061224	2.913752913752914e-4	0.0018689050541523299
BLCA	Hyper	chr6	100894513	100917871	80	26.062966655108646	48.36356189320388	22.300595238095237	5.91491752500234e-21	1.967867343535561e-18
BLCA	Hypo	chr6	101854480	104617160	14	-20.354922065913744	57.821948682385575	78.17687074829932	0.001481556263491921	0.006456075471662972
BLCA	Hyper	chr6	105388153	105388731	6	18.73243180767453	59.16100323624596	40.42857142857143	0.020562770562770564	0.04785472029997578
BLCA	Hyper	chr6	105400985	105401673	7	28.01433194637078	57.39528432732316	29.38095238095238	0.00874125874125874	0.025413416370863178
BLCA	Hyper	chr6	106429142	106429769	7	25.894491777293442	50.996532593619975	25.10204081632653	0.00874125874125874	0.025413416370863178
BLCA	Hyper	chr6	106957404	106958645	9	25.195715826783786	56.275080906148865	31.07936507936508	0.009378856437679967	0.026748792195723854
BLCA	Hyper	chr6	108440118	108444920	12	20.025726229002927	55.152710355987054	35.12698412698413	0.0027797952484989773	0.010566812340543554
BLCA	Hyper	chr6	108479394	108496811	55	20.989175387719076	42.20216240070609	21.212987012987014	5.7991675303103503e-11	3.550018395354784e-9
BLCA	Hypo	chr6	109009453	109053447	8	-13.061040799815071	71.12348300970874	84.18452380952381	0.018958818958818957	0.0457066423039958
BLCA	Hypo	chr6	112021635	112079056	13	-8.583315551762155	79.73170276325617	88.31501831501832	0.0025358152414283793	0.00984477840051241
BLCA	Hypo	chr6	112242305	112306329	7	-15.426012152433788	68.00936199722608	83.43537414965986	0.005536130536130536	0.017836829836829837
BLCA	Hypo	chr6	112620506	112688010	17	-13.13272007832259	68.36307824100514	81.49579831932773	0.0018814356776954428	0.007919002093358378
BLCA	Hypo	chr6	112691490	112947707	6	-10.86093774079211	77.98826860841424	88.84920634920636	0.004329004329004329	0.014748682602645202
BLCA	Hypo	chr6	114376759	114567943	9	-14.987966815636717	65.11785329018339	80.1058201058201	0.019991772932949403	0.04740711977198525
BLCA	Hypo	chr6	116441056	116454307	6	-5.621108799506854	81.87095469255664	87.4920634920635	0.010011193375433443	0.02822610600914396
BLCA	Hyper	chr6	117583181	117592358	24	15.773274965325935	30.61256067961165	14.839285714285715	8.388025812436576e-5	6.777737435772405e-4
BLCA	Hyper	chr6	123317124	123318023	11	14.60017652250662	26.781994704324802	12.181818181818182	9.922997539096611e-6	1.180883004186116e-4
BLCA	Hypo	chr6	124236421	125121219	9	-24.58916371295012	47.527238403451996	72.11640211640211	0.002817770464829288	0.010626702610583398
BLCA	Hypo	chr6	125743207	126067118	20	-17.928409616273694	43.883495145631066	61.81190476190476	0.010538397175723675	0.029389075475736666
BLCA	Hypo	chr6	126663048	127436400	20	-15.230466944059177	61.6004854368932	76.83095238095238	0.003357504610104117	0.012322122434780192
BLCA	Hyper	chr6	127839822	127840755	11	16.315975286849074	27.588702559576348	11.272727272727272	9.49772621599247e-5	7.511073601297785e-4
BLCA	Hypo	chr6	127977312	128752877	18	-6.08222890019007	81.2802049622438	87.36243386243386	0.0064996234242705835	0.020475553084610337
BLCA	Hypo	chr6	129418540	129920398	19	-13.657189089227924	70.82652018395504	84.48370927318295	5.636845466124376e-4	0.003148404489546257
BLCA	Hyper	chr6	130686592	130687884	8	16.36448220064725	26.82281553398058	10.458333333333334	5.439005439005439e-4	0.003057991889733256
BLCA	Hypo	chr6	130690629	131116068	14	-23.435085199128196	56.23838418862691	79.6734693877551	1.0638987351869301e-4	8.206605969405635e-4
BLCA	Hypo	chr6	131132063	131287984	17	-15.778480324168504	70.05625356938891	85.83473389355743	7.547974396468656e-6	9.330710837120865e-5
BLCA	Hypo	chr6	131958144	132102258	12	-15.233809138542147	55.63127022653722	70.86507936507937	0.012092127821028078	0.03296364876612286
BLCA	Hypo	chr6	132834914	133078831	33	-18.30906849353451	61.06178287731686	79.37085137085137	6.883671518576784e-6	8.635058108221238e-5
BLCA	Hyper	chr6	133561660	133564066	40	20.190568654646324	35.779854368932035	15.589285714285714	9.314896288123629e-10	4.168279906241053e-8
BLCA	Hypo	chr6	133584189	134159412	35	-17.972250842084406	50.23183079056866	68.20408163265306	7.847554376082043e-4	0.004128423171360419
BLCA	Hyper	chr6	134210138	134211217	12	16.902642934196333	37.43042071197411	20.52777777777778	0.014210348811237223	0.03653816838158173
BLCA	Hyper	chr6	137813584	137817260	20	22.829912159038372	42.320388349514566	19.49047619047619	6.706008543799326e-8	1.6935438078268132e-6
BLCA	Hyper	chr6	138849110	138867125	10	18.827011095700417	76.65558252427185	57.82857142857143	2.4356448505055315e-4	0.0016377464319919442
BLCA	Hyper	chr6	142409202	142410235	14	16.684358694934286	33.97347434119279	17.2891156462585	0.001481556263491921	0.006456075471662972
BLCA	Hypo	chr6	144711370	145670687	30	-10.83388811835414	71.27087378640776	82.1047619047619	1.3747227723380894e-4	0.001015621261087869
BLCA	Hyper	chr6	146350041	146350748	8	17.688439089227924	32.90867718446602	15.220238095238095	0.0034965034965034965	0.012496611282225482
BLCA	Hypo	chr6	147891156	148476471	10	-18.523890429958392	61.43325242718446	79.95714285714286	0.011615319664855269	0.032017444551683184
BLCA	Hypo	chr6	149178676	149320164	22	-8.446113352666751	79.70973080317741	88.15584415584415	0.0075294037306071464	0.022867730560038255
BLCA	Hypo	chr6	149806077	149806732	9	-23.02929316278831	21.087108953613807	44.11640211640212	8.227067050596462e-5	6.661747838218427e-4
BLCA	Hyper	chr6	150285333	150286838	7	20.185374149659864	35.464285714285715	15.27891156462585	0.00874125874125874	0.025413416370863178
BLCA	Hyper	chr6	151560831	151561236	9	17.322699953767913	43.94174757281553	26.61904761904762	0.019991772932949403	0.04740711977198525
BLCA	Hypo	chr6	152201038	152501942	17	-8.486667482526988	71.81025128498001	80.296918767507	0.006566839097559444	0.020644803933658532
BLCA	Hyper	chr6	154360344	154360894	7	20.231457631596328	40.972954230235786	20.741496598639454	0.0020396270396270395	0.008427227919668524
BLCA	Hypo	chr6	154361687	154477894	9	-16.746725227307753	68.7135922330097	85.46031746031746	3.907856849033319e-4	0.002369486577559664
BLCA	Hypo	chr6	154535120	154727665	19	-9.432683650874758	72.02095043433827	81.45363408521303	0.012635221836991922	0.034224678759880424
BLCA	Hypo	chr6	155639080	155803118	13	-16.6676001991536	56.2298356982823	72.8974358974359	0.01201041032529984	0.03285794058247922
BLCA	Hypo	chr6	159592134	160016373	27	-20.07701494837417	52.48912261776339	72.56613756613757	2.531872386560456e-4	0.0016846858697357051
BLCA	Hypo	chr6	160221822	160389833	35	-11.293055280364573	49.25388349514563	60.546938775510206	0.012886012347805276	0.034537751405221286
BLCA	Hypo	chr6	160643629	160679974	10	-14.340614886731393	67.09271844660194	81.43333333333334	0.014402779882656043	0.03688422746388355
BLCA	Hypo	chr6	160860356	161097311	17	-15.263454896521713	54.38920616790406	69.65266106442577	0.005884134984864757	0.018760583710077133
BLCA	Hypo	chr6	161575229	161638100	14	-13.93146093388812	75.25901525658807	89.19047619047619	2.6163732719123754e-4	0.001725904161782198
BLCA	Hypo	chr6	161796785	163149169	61	-13.872245969850617	52.729627566449146	66.60187353629976	5.536462634455937e-4	0.0031036638885609397
BLCA	Hypo	chr6	163289514	163569124	19	-14.256995644450935	75.52746550843128	89.7844611528822	2.799592926070108e-5	2.735949561978093e-4
BLCA	Hypo	chr6	163603588	163662864	19	-9.333175170937052	79.4161982626469	88.74937343358395	7.078277910603683e-5	5.973948168459016e-4
BLCA	Hypo	chr6	163711878	163746175	20	-10.3168284789644	68.81650485436893	79.13333333333333	0.020087542448136344	0.04761768116887835
BLCA	Hypo	chr6	164061538	164258843	24	-11.697772191400832	64.02841828478965	75.72619047619048	0.014335565437635017	0.036785964697781066
BLCA	Hypo	chr6	164294790	166073666	91	-15.924636620891823	63.143390589992535	79.06802721088435	6.621170461890935e-11	3.958218466749175e-9
BLCA	Hypo	chr6	166100251	166217639	32	-17.25277753698567	68.43621055825243	85.68898809523809	5.994165111132123e-9	2.0117259399290793e-7
BLCA	Hypo	chr6	166219132	166261046	24	-17.85232219910618	46.435376213592235	64.28769841269842	0.003145855982796697	0.01164590710225463
BLCA	Hypo	chr6	166324392	166382607	10	-24.305709662505777	51.775242718446606	76.08095238095238	0.007344822360302237	0.022521249793977068
BLCA	Hyper	chr6	166421992	166422741	6	21.100824472183696	33.58495145631068	12.484126984126984	0.0021645021645021645	0.00869436774948586
BLCA	Hyper	chr6	166579135	166583523	21	23.217114677586245	34.68423485899214	11.467120181405896	2.9669793529012618e-9	1.112908137666689e-7
BLCA	Hypo	chr6	166797738	166876585	38	-9.924608243910747	77.46135666836996	87.3859649122807	9.394448416850216e-5	7.464830663108811e-4
BLCA	Hypo	chr6	166922861	166965512	14	-19.236559672412657	64.0627600554785	83.29931972789116	0.001481556263491921	0.006456075471662972
BLCA	Hypo	chr6	167104601	167271883	44	-14.442123208506704	59.27432700794351	73.71645021645021	1.5848497836813756e-4	0.0011333897705355033
BLCA	Hypo	chr6	167490870	167653957	64	-16.823129767683774	54.70365594660194	71.52678571428571	2.408766064350877e-6	3.642158697946667e-5
BLCA	Hypo	chr6	167695026	167762783	24	-24.37882377870242	52.60133495145631	76.98015873015873	8.4786262783082e-7	1.5301520821135457e-5
BLCA	Hypo	chr6	167768382	167838138	29	-20.482236516970364	58.859306996986945	79.3415435139573	4.289078980623944e-6	5.965054550010735e-5
BLCA	Hypo	chr6	168061660	168139245	57	-15.357522041349327	60.495443706353264	75.85296574770258	5.327562241770928e-6	7.028707978281231e-5
BLCA	Hypo	chr6	168168453	168217825	22	-17.233498297818684	44.7470211827008	61.98051948051948	0.009846444362280007	0.027812843211578668
BLCA	Hypo	chr6	168372652	168500458	144	-14.450331008886835	69.6058859223301	84.05621693121694	1.972611600596891e-16	2.8480045222202655e-14
BLCA	Hypo	chr6	168502888	168718991	138	-19.05543495011625	58.651259321795415	77.70669427191166	2.24913462005246e-20	7.17099088026726e-18
BLCA	Hypo	chr6	168743574	168840641	79	-20.25058082714467	57.79703822047438	78.04761904761905	4.799400449956543e-12	3.825522108652861e-10
BLCA	Hyper	chr6	168841257	168842491	9	11.851068474854882	31.750539374325783	19.8994708994709	0.007095845331139449	0.022000570694440464
BLCA	Hypo	chr6	168843099	168975151	92	-19.576249020080805	62.79176340227944	82.36801242236025	1.713915652017966e-17	2.949149844803756e-15
BLCA	Hypo	chr6	168980554	168997248	7	-23.89229575325276	60.100901525658806	83.99319727891157	2.913752913752914e-4	0.0018689050541523299
BLCA	Hypo	chr6	169012253	169067435	30	-13.389636307597472	66.23576051779935	79.62539682539682	8.915926825456838e-5	7.143944719203741e-4
BLCA	Hypo	chr6	169091848	169226330	36	-15.143601993116555	69.98867313915858	85.13227513227513	5.552320147276022e-7	1.0648208964149404e-5
BLCA	Hypo	chr6	169235025	169338788	68	-15.974823910146583	63.97615648201028	79.95098039215686	7.369278828306214e-9	2.3637348292891392e-7
BLCA	Hypo	chr6	169351425	169545058	38	-14.465678760006812	64.78870720490546	79.25438596491227	1.153211723020996e-4	8.737006044115507e-4
BLCA	Hypo	chr6	169559628	169650832	73	-9.099734640498038	72.90091767522277	82.00065231572081	4.5406147616148206e-5	4.078026309375189e-4
BLCA	Hypo	chr6	169682364	169718132	15	-12.270003082139006	69.86650485436893	82.13650793650794	0.006399515670441353	0.020218453307273836
BLCA	Hypo	chr6	170189864	170337897	45	-11.53981353059023	44.057011866235165	55.596825396825395	0.016005584163122186	0.040248021694449874
BLCA	Hypo	chr6	170361827	170409675	45	-16.667694046334823	63.27939590075512	79.94708994708995	4.884318600449183e-6	6.52265374007629e-5
BLCA	Hypo	chr6	170414149	170444432	17	-17.689857496396616	63.833952027412906	81.52380952380952	0.0018814356776954428	0.007919002093358378
BLCA	Hypo	chr6	170453854	170528298	62	-13.60822595558737	63.84031475101785	77.44854070660523	8.529858670788933e-6	1.0393388303961292e-4
BLCA	Hypo	chr6	170532786	170571365	60	-15.882246879334259	61.54870550161812	77.43095238095238	8.811652571292778e-7	1.568064313384473e-5
BLCA	Hypo	chr6	170572016	170582543	19	-17.037034333406332	58.47675012774655	75.51378446115288	0.0013779116850161973	0.006148521346600577
BLCA	Hypo	chr6	170588360	170595195	22	-10.571780565712606	72.97583848190645	83.54761904761905	0.002706447917227246	0.010344052347076523
BLCA	Hypo	chr6	170733450	170814117	29	-14.36959363591436	63.69116170070305	78.0607553366174	1.6382012634702818e-4	0.00116177164671683
BLCA	Hypo	chr7	35373	143220	30	-20.67484204037602	51.31245954692557	71.98730158730159	5.528764562477211e-6	7.244196306862263e-5
BLCA	Hypo	chr7	160687	190423	45	-24.428050033389837	60.363484358144554	84.7915343915344	3.2704259993348607e-12	2.662265930522378e-10
BLCA	Hypo	chr7	195475	228114	52	-18.140121003591876	65.6364357729649	83.77655677655677	2.3018554933014434e-9	8.941014332356673e-8
BLCA	Hypo	chr7	231371	534834	19	-14.021905491885052	61.935487991824225	75.95739348370927	0.012635221836991922	0.034224678759880424
BLCA	Hypo	chr7	564137	604141	51	-12.52674662097849	68.90462592804111	81.43137254901961	6.111396902782403e-5	5.302087199556796e-4
BLCA	Hypo	chr7	672323	699266	10	-14.652450300508553	71.07135922330097	85.72380952380952	0.007344822360302237	0.022521249793977068
BLCA	Hypo	chr7	730641	734968	8	-8.523968446601941	80.60103155339806	89125	0.007381507381507382	0.022521249793977068
BLCA	Hyper	chr7	906040	908060	8	11.973214285714285	85.6875	73.71428571428572	0.007381507381507382	0.022521249793977068
BLCA	Hypo	chr7	979643	1004748	24	-14.220103251656651	46.31957928802589	60.53968253968254	0.0014430277726696621	0.006378999720663347
BLCA	Hypo	chr7	1014982	1035418	51	-11.051977101520219	42.31777079763945	53.36974789915966	0.003941740185542168	0.013848574793282215
BLCA	Hypo	chr7	1216035	1260736	39	-13.042462391976954	37.36046801095345	50.4029304029304	0.011663531152397802	0.032046441787485815
BLCA	Hyper	chr7	1268188	1278508	44	20.270667843483377	38.1418799646955	17.87121212121212	5.565708320234343e-9	1.8761585932349424e-7
BLCA	Hypo	chr7	1289853	1428900	125	-17.719127138233933	41.261825242718444	58.98095238095238	1.6398384187829598e-10	8.96288827180515e-9
BLCA	Hypo	chr7	1446265	1472830	29	-17.622837852918202	47.91739203213927	65.54022988505747	0.002393594954666049	0.00939282463859734
BLCA	Hypo	chr7	1604407	1702597	72	-17.681114193250117	45.616504854368934	63.29761904761905	2.747784240980033e-6	4.059082048644636e-5
BLCA	Hypo	chr7	1712054	1849782	94	-20.338685680841227	51.151182606899404	71.48986828774063	4.999900793439398e-11	3.1360033501146122e-9
BLCA	Hypo	chr7	2476423	2576360	73	-12.96967523543531	41.11773507115308	54.08741030658839	0.0016034645622099522	0.006912513143679185
BLCA	Hyper	chr7	2802374	2802976	6	26.200300508552935	73.05744336569579	46.85714285714286	0.0010822510822510823	0.005118285093563215
BLCA	Hypo	chr7	3849340	3920534	11	-16.545128819400666	72.07391879964696	88.61904761904762	7.002801120448179e-4	0.003768314639498556
BLCA	Hypo	chr7	3990670	4030736	30	-8.53453151487132	81.41626213592232	89.95079365079366	1.401632900239777e-5	1.563454074728101e-4
BLCA	Hypo	chr7	4051431	4119142	14	-7.008338286771019	86.22295423023579	93.2312925170068	6.540933179780938e-5	5.579846230956938e-4
BLCA	Hypo	chr7	4147274	4180723	34	-9.397456555437708	77.90926613363793	87.30672268907563	2.5195698431345773e-5	2.507119432986448e-4
BLCA	Hypo	chr7	4187852	4243604	36	-9.154472954230235	78.67489212513485	87.82936507936508	2.3547055163638428e-6	3.5679617051913114e-5
BLCA	Hypo	chr7	4245377	4266998	26	-8.702892172552366	78.98758401792382	87.69047619047619	8.504765990952315e-5	6.864817443329864e-4
BLCA	Hyper	chr7	4778839	4779342	6	32.339574664817384	76.57766990291262	44.23809523809524	0.0010822510822510823	0.005118285093563215
BLCA	Hyper	chr7	4805943	4807556	7	14.384683970675649	86.01733703190014	71.63265306122449	0.005536130536130536	0.017836829836829837
BLCA	Hyper	chr7	4830907	4832535	7	16.13113400700086	75.63453536754508	59.50340136054422	0.013111888111888112	0.034537751405221286
BLCA	Hypo	chr7	4837835	4876909	53	-17.738160660857126	57.491848323868844	75.23000898472597	8.683343387205176e-8	2.1503217993169584e-6
BLCA	Hyper	chr7	4901337	4901798	7	16.571230433921144	51.06102635228849	34.48979591836735	0.01893939393939394	0.0457066423039958
BLCA	Hypo	chr7	4902015	4919428	15	-16.879927569733397	67.8121359223301	84.6920634920635	1.075313736320694e-4	8.248050029714706e-4
BLCA	Hyper	chr7	4998045	4998714	6	13.18442749267992	25.390776699029125	12.206349206349206	0.007575757575757576	0.022867730560038255
BLCA	Hypo	chr7	5112642	5164610	15	-14.345245800585609	54.99126213592233	69.33650793650794	0.020419956430453502	0.04785472029997578
BLCA	Hypo	chr7	5292959	5370601	52	-13.327832159749635	60.1566000746826	73.48443223443223	2.0512958308675062e-4	0.0014141005133151492
BLCA	Hypo	chr7	5647658	5650145	6	-23.54018338727077	45.015372168284784	68.55555555555556	0.0010822510822510823	0.005118285093563215
BLCA	Hyper	chr7	8480865	8483710	14	30.183756026682516	46.62933425797503	16.44557823129252	4.985467362637911e-8	1.3020066982561533e-6
BLCA	Hypo	chr7	8486611	10819836	22	-26.111471861471863	52.34090909090909	78.45238095238095	7.600488511113652e-7	1.3913621551923845e-5
BLCA	Hypo	chr7	11279531	11860398	11	-18.156274954818645	65.12511032656664	83.28138528138528	0.0012233638394629107	0.00559879192558026
BLCA	Hypo	chr7	13025242	14025907	12	-18.194078440437664	53.20671521035599	71.40079365079364	0.016620712710361387	0.041617046354609076
BLCA	Hyper	chr7	15725196	15727598	18	14.02890789541275	26.30933117583603	12.28042328042328	5.91048264819947e-4	0.003264804811147223
BLCA	Hypo	chr7	15764568	16439993	23	-9.962305774990451	76.1909033347404	86.15320910973085	9.051156205401443e-4	0.004679692384035935
BLCA	Hypo	chr7	16511803	16625816	13	-14.10512464881397	70.63480209111277	84.73992673992674	0.0070219987308424514	0.021976414841884024
BLCA	Hypo	chr7	18548581	19135149	15	-18.655224225612574	51.992394822006474	70.64761904761905	0.01045115342225688	0.02918694379091593
BLCA	Hyper	chr7	19146032	19147487	10	18.767799352750806	33.43446601941748	14.666666666666668	1.6237632336703542e-4	0.0011526007666090492
BLCA	Hyper	chr7	19156086	19158210	23	16.28919676777423	30.74261291684255	14.453416149068323	2.7425335497517543e-7	5.861973944888387e-6
BLCA	Hyper	chr7	19812327	19813525	16	15.789658460471568	35.12894417475728	19.339285714285715	0.006780768542457357	0.021291112386903448
BLCA	Hypo	chr7	20654932	20795987	11	-22.702338923212707	62.29766107678729	85	9.922997539096611e-6	1.180883004186116e-4
BLCA	Hyper	chr7	20817530	20825545	21	19.975585056028883	47.17059639389736	27.19501133786848	1.9243216851729666e-4	0.0013472012383296927
BLCA	Hypo	chr7	21682152	21984339	12	-18.22821312991216	59.24797734627832	77.47619047619048	0.012092127821028078	0.03296364876612286
BLCA	Hypo	chr7	22599779	22821836	28	-15.583192985932236	45.927011095700415	61.51020408163265	0.011709790735120391	0.03214311754415711
BLCA	Hyper	chr7	24323128	24325371	15	27.306472491909386	41.17313915857605	13.866666666666667	1.28934500757877e-8	3.838936964199513e-7
BLCA	Hypo	chr7	25264629	25890572	23	-18.267718949124603	58.06975517095821	76.33747412008282	5.344707598314525e-4	0.0030452496308490504
BLCA	Hyper	chr7	25897725	25899194	12	19.56092040376021	63.43790453074433	43.87698412698413	0.003405868596338377	0.012469716028316391
BLCA	Hypo	chr7	26487456	26677374	9	-17.96044588277598	65.29881337648328	83.25925925925927	0.005306458247634718	0.017298740050645883
BLCA	Hyper	chr7	27145972	27148204	11	10.741299962173747	77.61142983230361	66.87012987012987	0.0020512253484389707	0.008443236345484132
BLCA	Hypo	chr7	27152583	27155234	24	-11.454167629835105	32.317657766990294	43.7718253968254	1.0723698013709521e-4	8.248050029714706e-4
BLCA	Hyper	chr7	27203430	27208285	27	21.96042875978151	42.12621359223301	20.1657848324515	1.2467480847237805e-9	5.3000646357257605e-8
BLCA	Hyper	chr7	27215464	27219344	8	17.245116736014793	55.5248786407767	38.279761904761905	0.020210673190308125	0.04785026957061813
BLCA	Hyper	chr7	27225058	27237893	49	23.913767726230574	42.916683178125616	19.002915451895042	2.5817924435062324e-15	3.406185478915464e-13
BLCA	Hyper	chr7	27240758	27244564	11	21.298186441390325	40.39342453662842	19.095238095238095	2.764263600176913e-4	0.0018125231421211429
BLCA	Hyper	chr7	27284520	27292145	22	10.080690749380071	61.8101279788173	51.72943722943723	0.0010974825589559556	0.005183911445142576
BLCA	Hypo	chr7	28452066	28905872	50	-19.0017938049006	42.16582524271845	61.16761904761905	6.095188352170139e-6	7.7863741687489e-5
BLCA	Hyper	chr7	29519388	29519656	6	13.445619509939897	65.70752427184466	52.26190476190476	0.0010822510822510823	0.005118285093563215
BLCA	Hyper	chr7	29605237	29606349	7	23.967043127930786	60.769764216366156	36.802721088435376	2.913752913752914e-4	0.0018689050541523299
BLCA	Hypo	chr7	31096717	31374862	27	-19.164089655999042	36.73714491190219	55.901234567901234	0.00845684135957082	0.02508207367575036
BLCA	Hypo	chr7	31377934	32106580	28	-27.14090879070075	45.8880027739251	73.02891156462584	2.933650937129616e-6	4.2677370667140344e-5
BLCA	Hyper	chr7	32109831	32111068	11	15.757039885680664	31.778684907325683	16.02164502164502	0.00019704237970491842	0.001365732146288076
BLCA	Hypo	chr7	32111237	32337188	7	-16.705485106664025	58.30131761442441	75.00680272108843	0.01893939393939394	0.0457066423039958
BLCA	Hypo	chr7	33301429	33942086	39	-17.348041656294082	67.76306945481703	85.11111111111111	1.1593185347615245e-8	3.506365781816279e-7
BLCA	Hypo	chr7	33945948	34799274	42	-18.211875041278645	54.78132223763292	72.99319727891157	1.0505192624723135e-5	1.2367035994520218e-4
BLCA	Hyper	chr7	35292896	35294430	13	17.661625591237243	34.76418969380134	17.102564102564102	4.326673461146473e-6	5.9695924132016296e-5
BLCA	Hypo	chr7	36007968	36167904	26	-13.679847256303567	67.12051904406273	80.8003663003663	1.9903808805409715e-4	0.0013783162441538023
BLCA	Hypo	chr7	36409818	37438819	66	-18.015857254934925	42.43075169167402	60.44660894660895	4.669174077128848e-5	4.164163174614212e-4
BLCA	Hypo	chr7	37490887	37947061	19	-22.16958050465971	58.36676034747062	80.53634085213032	5.294777287813028e-5	4.6569696329132527e-4
BLCA	Hypo	chr7	38299481	38669789	52	-19.233765425513	42.679238237490665	61.913003663003664	3.7088665260703846e-5	3.4652315821111825e-4
BLCA	Hypo	chr7	38671977	38767436	13	-22.958764536434437	54.10716952949963	77.06593406593406	0.005987250735534489	0.019041746728308356
BLCA	Hypo	chr7	39170497	39298343	10	-17.30610263522885	51.57961165048544	68.88571428571429	0.014402779882656043	0.03688422746388355
BLCA	Hypo	chr7	40177071	42107777	117	-16.68322822449036	53.84098829972616	70.52421652421653	4.2816814930483954e-10	2.0736346066333114e-8
BLCA	Hypo	chr7	43156037	43577361	43	-16.400549946779346	59.17752314292165	75.578073089701	3.5496274920381716e-4	0.0021993319489130433
BLCA	Hypo	chr7	44149037	44153188	7	-21.348837593289744	55.88245492371706	77.2312925170068	0.0034965034965034965	0.012496611282225482
BLCA	Hypo	chr7	44191311	44348318	56	-11.182232844594148	57.481882801664355	68.66411564625851	7.507821339397536e-4	0.003981278509291057
BLCA	Hypo	chr7	48495072	48887421	9	-15.834206606051264	71.39859762675297	87.23280423280423	0.0013780337309749072	0.006148521346600577
BLCA	Hypo	chr7	48889641	49811327	21	-23.568946348766044	46.99341192787795	70.56235827664399	1.2259654551018703e-4	9.251565742050801e-4
BLCA	Hyper	chr7	49813031	49815751	17	17.71293954474994	28.20873786407767	10.495798319327731	7.089820450412645e-7	1.3179553735360313e-5
BLCA	Hypo	chr7	50133024	50342300	13	-17.82478928838152	63.20817774458551	81.03296703296704	0.012797723208276445	0.034537751405221286
BLCA	Hypo	chr7	50348174	50466520	17	-15.203618340540098	57.96444888635066	73.16806722689076	0.014335000786893686	0.036785964697781066
BLCA	Hypo	chr7	50533512	50696408	39	-18.17433645103548	45.11015683345781	63.28449328449329	0.0011141198249974631	0.005252769501466782
BLCA	Hypo	chr7	50772477	50815700	17	-17.85889015800495	66.7685608223872	84.62745098039215	5.193678306188265e-7	1.0086808730698632e-5
BLCA	Hypo	chr7	50861739	51383661	46	-16.73147450200004	53.74161038412832	70.47308488612836	3.352932480001626e-5	3.1911242956433384e-4
BLCA	Hypo	chr7	51388467	51925284	36	-15.260469640930808	52.06492718446602	67.32539682539682	0.002309360544183324	0.00918462935763555
BLCA	Hypo	chr7	52344545	53255225	24	-24.3974370087841	57.56684870550162	81.96428571428571	3.0035886192890024e-6	4.3611878775710525e-5
BLCA	Hypo	chr7	53289011	54605863	17	-30.615546218487395	45.48529411764706	76.10084033613445	3.920970008384705e-7	7.979591091531852e-6
BLCA	Hypo	chr7	55280797	55412268	18	-14.293149946062565	52.65129449838188	66.94444444444444	0.017103485718829997	0.0424783747875648
BLCA	Hyper	chr7	55516436	55517132	6	11.55911927877947	71.41626213592232	59.85714285714286	0.020562770562770564	0.04785472029997578
BLCA	Hypo	chr7	55799739	55980196	23	-10.824509035357497	57.46327564373153	68.28778467908903	0.014010730131764343	0.036270825755153356
BLCA	Hypo	chr7	56356698	56450073	13	-17.247830648316086	63.97927557879014	81.22710622710623	0.009549352921946811	0.027113784251850463
BLCA	Hypo	chr7	56551590	56563820	9	-24.488262187291312	29.866235167206042	54.354497354497354	0.002817770464829288	0.010626702610583398
BLCA	Hypo	chr7	56875093	56942355	29	-15.02278125846924	68.51088048208905	83.53366174055829	6.101791950095633e-7	1.1614654726898454e-5
BLCA	Hypo	chr7	56951337	57271021	33	-20.055082727412827	55.05891438658429	75.11399711399712	9.747753466004497e-6	1.1691192715026083e-4
BLCA	Hypo	chr7	57485543	57896675	25	-21.857938049006012	56.49825242718447	78.35619047619048	5.670114796521866e-7	1.084692960574633e-5
BLCA	Hypo	chr7	63018494	63086120	21	-18.494364088677543	56.31969486823856	74.8140589569161	4.4897246480436124e-4	0.002657028074774147
BLCA	Hypo	chr7	63204500	63232941	21	-12.24941109129736	71.69163199260286	83.94104308390023	4.346324813798285e-5	3.9308634217701677e-4
BLCA	Hypo	chr7	63646960	63709633	13	-25.286141043422596	59.74682598954443	85.03296703296704	1.8268176835951773e-6	2.8645100235389952e-5
BLCA	Hypo	chr7	67711231	69058543	12	-25.469939513022034	44.69275889967638	70.16269841269842	0.004146580300840632	0.014455413422338277
BLCA	Hypo	chr7	69068068	70085367	41	-21.608315573446998	52.45672507695951	74.0650406504065	2.2086869263367976e-6	3.368134710264979e-5
BLCA	Hypo	chr7	70100095	70157145	8	-14.713404415164124	74.2806432038835	88.99404761904762	0.0034965034965034965	0.012496611282225482
BLCA	Hypo	chr7	70203221	70258753	24	-9.212214902142087	80.45246763754045	89.66468253968254	4.351073338002263e-5	3.9308634217701677e-4
BLCA	Hypo	chr7	70322401	70595507	7	-27.035516148206856	44.61754507628294	71.65306122448979	0.01893939393939394	0.0457066423039958
BLCA	Hyper	chr7	70596377	70598282	12	25.625231160425336	41.387135922330096	15.761904761904761	3.698011505253395e-7	7.620187001931212e-6
BLCA	Hypo	chr7	70599516	71177239	21	-29.95369086145785	39.3955154877485	69.34920634920636	2.866044461690384e-6	4.193302527888111e-5
BLCA	Hypo	chr7	72742709	72791458	12	-15.657555093234704	62.54085760517799	78.1984126984127	0.010244601273003482	0.028820473875375972
BLCA	Hypo	chr7	73414616	73441057	8	-16.90707350901526	20.50364077669903	37.410714285714285	0.007381507381507382	0.022521249793977068
BLCA	Hyper	chr7	73894573	73895278	6	27.337552011095703	62.24231391585761	34.904761904761905	0.0010822510822510823	0.005118285093563215
BLCA	Hypo	chr7	77670016	79050007	33	-24.307334790344502	56.747499264489555	81.05483405483406	4.945250454072518e-9	1.6958235930263894e-7
BLCA	Hyper	chr7	79082038	79084196	23	18.9134605720718	37.50559307724778	18.592132505175982	8.129156874501326e-5	6.624526986547832e-4
BLCA	Hypo	chr7	80548307	81381353	21	-16.39901591704643	48.87309292649098	65.27210884353741	0.009652753702591358	0.02733636984908552
BLCA	Hypo	chr7	81400745	82057703	10	-25.073578363384186	49.1121359223301	74.18571428571428	3.6264045551971246e-4	0.002228855233443245
BLCA	Hypo	chr7	82073690	82581607	19	-12.371158478721075	65.97470618293306	78.34586466165413	0.0013779116850161973	0.006148521346600577
BLCA	Hypo	chr7	84161222	84789871	11	-20.594502584793844	59.28861429832304	79.88311688311688	0.002618253779244491	0.010048189966056203
BLCA	Hypo	chr7	86277679	86416314	11	-17.896019837767412	60.18623124448367	78.08225108225108	0.011653851824130462	0.03203134847638157
BLCA	Hypo	chr7	88423665	89637491	11	-21.372725171268858	60.67056487202118	82.04329004329004	1.3750439447033876e-4	0.001015621261087869
BLCA	Hypo	chr7	90390136	90879360	19	-15.828953451590138	67.51941747572816	83.3483709273183	2.103854434946953e-4	0.00143909521601674
BLCA	Hypo	chr7	93023154	93181353	7	-21.700201439799223	59.86442441054091	81.56462585034014	0.013111888111888112	0.034537751405221286
BLCA	Hyper	chr7	95025611	95026502	20	15.467024965325937	40.68131067961165	25.214285714285715	6.804316423700281e-5	5.778760185810716e-4
BLCA	Hyper	chr7	96619068	96633726	36	24.41578055170288	56.82847896440129	32.41269841269841	3.6639396895080733e-9	1.2920030647057963e-7
BLCA	Hyper	chr7	96636116	96645019	20	17.70131761442441	46.69417475728155	28.992857142857144	4.178828911623804e-4	0.002507952849548655
BLCA	Hyper	chr7	96647021	96652245	29	23.38463899118402	55.49958151991965	32.11494252873563	1.3189367763220474e-7	3.16065811543879e-6
BLCA	Hypo	chr7	97841001	97847111	21	-10.174520617308414	70.7007628294036	80.87528344671202	0.002027045458712788	0.008427227919668524
BLCA	Hyper	chr7	98245830	98247758	7	26.585265174030777	45.90499306518724	19.31972789115646	2.913752913752914e-4	0.0018689050541523299
BLCA	Hypo	chr7	98366427	98463532	9	-19.353624081779422	42.323624595469255	61.67724867724868	0.009378856437679967	0.026748792195723854
BLCA	Hypo	chr7	99376495	99474543	13	-12.2269550837512	67.11370425690814	79.34065934065934	0.019347249197161704	0.046511200394810354
BLCA	Hyper	chr7	99775422	99775558	7	16.069810448451225	43.59361997226075	27.523809523809526	0.013111888111888112	0.034537751405221286
BLCA	Hyper	chr7	101005910	101006089	7	21.37520639323691	47.48404993065187	26.108843537414966	0.00874125874125874	0.025413416370863178
BLCA	Hypo	chr7	104004514	104546755	12	-20.368469717984283	46.32200647249191	66.69047619047619	0.005022269425284637	0.01675257438634614
BLCA	Hypo	chr7	106687922	106801878	8	-17.441386384650947	68.87408980582524	86.31547619047619	0.014063714063714063	0.036270825755153356
BLCA	Hypo	chr7	107644024	108025567	38	-12.712333017008541	61.46435871231477	74.17669172932331	5.242446738110974e-4	0.0030093096569598467
BLCA	Hypo	chr7	108213750	110231643	13	-21.47837760944557	50.55825242718446	72.03663003663004	0.0050843220583427886	0.016920840346446073
BLCA	Hypo	chr7	110484554	110722380	7	-10.100389670431278	77.58668515950069	87.68707482993197	0.01893939393939394	0.0457066423039958
BLCA	Hypo	chr7	111370856	111731013	15	-14.610695022345505	64.47184466019418	79.08253968253968	0.0032840262015535054	0.012122223103853075
BLCA	Hyper	chr7	116962516	116964841	15	12.288079827400216	24.399190938511328	12.11111111111111	0.0018414884291111564	0.007772239084147032
BLCA	Hypo	chr7	117067727	117067978	6	-22.518801047927262	64.3462783171521	86.86507936507937	0.0010822510822510823	0.005118285093563215
BLCA	Hyper	chr7	117119382	117120064	9	21.418027944726973	39.3492448759439	17.93121693121693	2.4681201151789385e-4	0.001646561039350413
BLCA	Hypo	chr7	117307076	117502752	8	-17.54397827092002	55.12864077669903	72.67261904761905	0.018958818958818957	0.0457066423039958
BLCA	Hypo	chr7	117864674	119831208	12	-20.68526544922176	62.763147249190936	83.4484126984127	0.0022565266205056217	0.009007272665680239
BLCA	Hypo	chr7	120639815	120968288	21	-14.104902802544967	61.99260286638928	76.09750566893425	0.0026197254289443443	0.010048189966056203
BLCA	Hypo	chr7	121516787	121773889	13	-16.303415839823607	70.79182225541449	87.0952380952381	3.140203449800973e-4	0.0019825772935542114
BLCA	Hyper	chr7	121939827	121942209	11	25.572868070440883	45.10966460723742	19.536796536796537	4.056903705106928e-5	3.7336497172500157e-4
BLCA	Hyper	chr7	121955717	121957254	9	30.275389120049315	45.06903991370011	14.793650793650793	2.0567667626491154e-5	2.1296859631652276e-4
BLCA	Hypo	chr7	122338579	122524465	9	-13.857271279601376	72.79881337648328	86.65608465608466	0.0013780337309749072	0.006148521346600577
BLCA	Hypo	chr7	122635026	123171919	10	-20.641724456773	63.334466019417476	83.97619047619048	7.523436316005976e-4	0.003981281790461807
BLCA	Hypo	chr7	123674510	124401702	14	-24.037365431609537	48.30617198335645	72.34353741496598	4.8568423046818523e-4	0.0028369891080477507
BLCA	Hypo	chr7	124633001	126890973	23	-24.94989849042192	45.8803292528493	70.83022774327122	1.9866468961921965e-5	2.0939148828736482e-4
BLCA	Hypo	chr7	127251054	127256920	9	-23.491100323624597	41.620010787486514	65.11111111111111	0.009378856437679967	0.026748792195723854
BLCA	Hyper	chr7	127670570	127673038	15	22.048520573277855	49.172330097087375	27.123809523809523	0.002723476351634386	0.010388853959474737
BLCA	Hyper	chr7	127880619	127881344	7	22.93345882042137	64.8994452149792	41.965986394557824	0.00874125874125874	0.025413416370863178
BLCA	Hypo	chr7	128348852	128371353	10	-13.808622283865004	58.37233009708738	72.18095238095238	0.017731494511680268	0.04366958352216846
BLCA	Hypo	chr7	128480934	128496737	31	-13.014152983460844	65.69245223927341	78.70660522273425	0.001046891898088977	0.005118285093563215
BLCA	Hypo	chr7	128696983	128765077	7	-17.571478105805433	62.12239944521498	79.6938775510204	0.013111888111888112	0.034537751405221286
BLCA	Hyper	chr7	129415968	129418470	7	16.318489531735025	69.91712898751734	53.59863945578231	0.01893939393939394	0.0457066423039958
BLCA	Hyper	chr7	130130122	130133110	50	8.997122052704576	64.6114077669903	55.614285714285714	7.096152821443347e-7	1.3179553735360313e-5
BLCA	Hypo	chr7	131246794	132258096	66	-19.88096639067513	45.66593115622242	65.54689754689754	4.808382479495904e-7	9.532057702876336e-6
BLCA	Hypo	chr7	132800301	132937434	7	-18.814279109702134	62.17891816920943	80.99319727891157	0.01893939393939394	0.0457066423039958
BLCA	Hypo	chr7	132984180	133538683	24	-3.822266527970412	84.02892394822007	87.85119047619048	0.014796655262836628	0.037829604434088164
BLCA	Hypo	chr7	134915756	134933830	21	-7.8744083393875375	80.26618122977347	88.140589569161	0.004628450657766841	0.015574716109600647
BLCA	Hyper	chr7	136553088	136556271	21	13.937410562930674	30.309292649098474	16.3718820861678	5.370179175328495e-4	0.0030529428714423214
BLCA	Hypo	chr7	136563350	137530010	68	-18.69645916619075	49.18589377498572	67.88235294117646	2.3542771083808168e-7	5.132458243113963e-6
BLCA	Hypo	chr7	138490557	138551905	8	-13.403548312528894	77.37621359223301	90.7797619047619	0.005205905205905206	0.017054697240480313
BLCA	Hypo	chr7	138601707	138719784	29	-6.716677029030561	65.90893873451624	72.6256157635468	0.012564260638528474	0.03406864720270017
BLCA	Hypo	chr7	139484351	139847604	32	-11.914232258437355	63.24499393203884	75.15922619047619	0.0018373037624199958	0.007758856727393933
BLCA	Hypo	chr7	141404769	142458190	106	-14.389649246765934	53.21322586554314	67.60287511230908	4.329748809888793e-6	5.9695924132016296e-5
BLCA	Hypo	chr7	142511280	142636840	49	-10.24106730070669	57.62968099861304	67.87074829931973	0.010077939642172679	0.02839337044989151
BLCA	Hypo	chr7	142660200	142920096	23	-18.91513397254216	48.93372731110173	67.8488612836439	0.0018066142779506785	0.0076758536673395845
BLCA	Hyper	chr7	143579665	143582630	8	35.53094660194175	54.15594660194175	18625	3.108003108003108e-4	0.001975285696215929
BLCA	Hypo	chr7	143604179	145395986	59	-15.120264149760612	50.38740332400856	65.50766747376917	2.535642112054687e-4	0.001685728361550171
BLCA	Hypo	chr7	145875026	148321082	49	-21.73646296243879	41.922429165841095	63.65889212827988	9.320641567331639e-7	1.6320720657487803e-5
BLCA	Hyper	chr7	149389669	149411256	6	32.40786330713515	72.0586569579288	39.65079365079365	0.012987012987012988	0.034537751405221286
BLCA	Hyper	chr7	149916616	149918226	6	23.677781630451534	47.6460355987055	23.96825396825397	0.020562770562770564	0.04785472029997578
BLCA	Hypo	chr7	150147536	150495791	67	-15.726514790817065	45.74043616867121	61.46695095948827	1.2072344570097598e-4	9.128219431856406e-4
BLCA	Hyper	chr7	150497065	150498205	11	13.423223216912538	28.1851279788173	14.761904761904763	0.007884530330350765	0.023604235558624433
BLCA	Hypo	chr7	150498493	150649807	41	-15.48975000845709	47.416173336490644	62.90592334494774	0.0013869283243883234	0.006173807759289966
BLCA	Hypo	chr7	150865186	150889435	32	-11.71374032015719	49.95441444174757	61.66815476190476	0.015240499574078548	0.03887343424694969
BLCA	Hypo	chr7	151088236	151106082	17	-17.055070571918087	56.373500856653344	73.42857142857143	0.0047472490881516425	0.01594642231015644
BLCA	Hyper	chr7	151106990	151107637	6	18.30582524271845	26.13915857605178	7.833333333333333	0.0010822510822510823	0.005118285093563215
BLCA	Hypo	chr7	151468796	151553868	47	-17.200976775754715	65.80510225160091	83.00607902735563	2.6533747315316748e-6	3.942451154501044e-5
BLCA	Hypo	chr7	151575677	151716974	11	-25.59073046694406	50.17983230361871	75.77056277056278	5.114017244401444e-4	0.0029578578952501773
BLCA	Hypo	chr7	152592753	152620910	13	-21.47874213165475	55.43334578043316	76.91208791208791	7.749552910409016e-4	0.004083993035154944
BLCA	Hyper	chr7	152621979	152623304	10	19.068007397133613	36.720388349514565	17.652380952380952	5.25016778886748e-4	0.0030093096569598467
BLCA	Hyper	chr7	153583318	153585368	11	27.120329508679024	48.72639011473963	21.606060606060606	2.835142154027603e-6	4.1560359698504253e-5
BLCA	Hypo	chr7	153586022	153744840	7	-20.51883957466482	47.67163661581137	68.19047619047619	0.0034965034965034965	0.012496611282225482
BLCA	Hyper	chr7	153748370	153750421	8	18.310722954230236	34.70358009708738	16.392857142857142	0.014063714063714063	0.036270825755153356
BLCA	Hyper	chr7	154001891	154002618	6	10.116870858375714	25.32322006472492	15.206349206349206	0.012987012987012988	0.034537751405221286
BLCA	Hypo	chr7	154003215	154735824	80	-19.34144417475728	49.821055825242716	69.1625	6.422830267077134e-8	1.6328072160689114e-6
BLCA	Hypo	chr7	154863338	155023177	27	-14.8809823461927	48.95676015821647	63.83774250440917	0.009783519564558203	0.02767596735970402
BLCA	Hyper	chr7	155164294	155168600	21	24.851628029852716	38.91285251964864	14.061224489795919	4.657865794625699e-7	9.282414149261547e-6
BLCA	Hyper	chr7	155241490	155249133	18	16.95884702316741	28.985302049622437	12.026455026455027	4.936565518753202e-7	9.685794704999874e-6
BLCA	Hyper	chr7	155255122	155261402	19	23.341697690829015	40.94570771589167	17.604010025062657	5.116951482478396e-7	9.963082123136053e-6
BLCA	Hyper	chr7	155301734	155303298	6	24.224032978887347	45.63673139158576	21.41269841269841	0.004329004329004329	0.014748682602645202
BLCA	Hypo	chr7	155329959	155369424	17	-15.813460335590547	63.78597944031982	79.59943977591037	0.014335000786893686	0.036785964697781066
BLCA	Hyper	chr7	155595288	155599780	15	22.36838495916166	55.16521035598706	32.7968253968254	7.017904876251244e-5	5.94695549424967e-4
BLCA	Hypo	chr7	155617398	156238599	155	-15.769723204032632	61.51291888506107	77.2826420890937	3.8326959984064465e-17	6.109956204126276e-15
BLCA	Hypo	chr7	156263827	156371613	32	-17.256663921636616	60.71655036407767	77.97321428571429	4.2664814235158894e-6	5.965054550010735e-5
BLCA	Hyper	chr7	156795156	156801818	23	27.072081850891475	46.74081891093288	19.66873706004141	8.13755556057616e-12	6.104762269561645e-10
BLCA	Hyper	chr7	156807474	156811517	11	15.683037027697221	31.336716681376874	15.653679653679653	0.007884530330350765	0.023604235558624433
BLCA	Hyper	chr7	156812806	156815030	13	21.011335751627016	39.14320388349515	18.13186813186813	3.157983561236662e-5	3.024391766030405e-4
BLCA	Hypo	chr7	157071437	157106684	25	-12.494308830328249	55.66378640776699	68.15809523809524	0.011735519707774781	0.03218645046734503
BLCA	Hypo	chr7	157215172	157361396	156	-23.007808332444256	56.29438946975355	79.3021978021978	5.30539128423321e-29	6.766142351158754e-26
BLCA	Hypo	chr7	157365643	157403114	64	-25.15283496590384	54.040617415048544	79.19345238095238	7.397291981540998e-15	8.2034896003988e-13
BLCA	Hypo	chr7	157407820	157476443	118	-22.797874695377576	56.0511971367451	78.84907183212268	3.26498969758435e-20	9.609115833044403e-18
BLCA	Hyper	chr7	157476575	157478510	6	18.193519802743104	36.70145631067961	18.50793650793651	0.0021645021645021645	0.00869436774948586
BLCA	Hyper	chr7	157481091	157486012	15	15.197973493604561	28.18527508090615	12.987301587301587	3.2749363192500754e-6	4.7193620932018036e-5
BLCA	Hypo	chr7	157486718	157744347	310	-24.056046709319492	53.29141872846853	77.34746543778802	1.060646346210946e-53	2.705355280402053e-50
BLCA	Hypo	chr7	157776887	157808584	27	-19.55012328556018	54.46574973031284	74.01587301587301	8.740648551166449e-7	1.559054608706892e-5
BLCA	Hypo	chr7	157810706	157956161	94	-26.566548381385193	56.28147593472423	82.84802431610942	6.132144780176309e-24	3.128211457193941e-21
BLCA	Hypo	chr7	157957646	157996423	32	-28.124017568192325	57.52032766990291	85.64434523809524	1.0155954022791474e-9	4.518218615255835e-8
BLCA	Hypo	chr7	157997479	158109694	83	-25.58221512958909	56.6415370218739	82.22375215146299	4.0870233729759525e-20	1.1582926981485921e-17
BLCA	Hypo	chr7	158111178	158362052	168	-18.956944306848953	57.91295365233472	76.86989795918367	2.8246333194471965e-21	9.824588254731794e-19
BLCA	Hypo	chr7	158363265	158378215	8	-21.939609338881183	64.60800970873787	86.54761904761905	5.439005439005439e-4	0.003057991889733256
BLCA	Hypo	chr7	158792197	158854447	56	-18.535538851462913	56.64983529819695	75.18537414965986	8.540578591564712e-8	2.1287461688160644e-6
BLCA	Hypo	chr7	158856818	158903832	23	-24.63168103881485	60.912832418742084	85.54451345755693	5.475238875683184e-10	2.539183507680468e-8
BLCA	Hypo	chr7	158909100	158935647	9	-21.900755124056097	53.43257820927724	75.33333333333333	0.0019950637597696418	0.00830589112609211
BLCA	Hyper	chr7	158936508	158938491	11	28.31777203379145	41.87621359223301	13.558441558441558	1.4175710770138016e-6	2.3177892908781214e-5
BLCA	Hypo	chr7	158945956	159026609	22	-24.385375950909932	55.23367166813769	79.61904761904762	4.684028731507673e-7	9.30965918272642e-6
BLCA	Hypo	chr8	218468	334071	28	-14.491273693943599	64.55634535367545	79.04761904761905	0.00103933930419236	0.005118285093563215
BLCA	Hyper	chr8	686919	688417	6	22.73828787178302	31.635113268608414	8.896825396825397	0.0010822510822510823	0.005118285093563215
BLCA	Hypo	chr8	693950	840770	83	-18.563048309743827	62.70201193122003	81.26506024096385	6.613650539088026e-12	5.164046318887915e-10
BLCA	Hypo	chr8	848352	1319507	377	-20.692392614639015	59.01974582163735	79.71213843627636	1.2517352984120755e-60	9.578278503449202e-57
BLCA	Hypo	chr8	1324411	1496751	151	-22.04934126933098	55.275477399858545	77.32481866918953	2.8920190797320255e-28	3.1613899997299228e-25
BLCA	Hypo	chr8	1497608	1692726	118	-18.506192356817664	62.83803686029291	81.34422921711057	1.7343406039750263e-17	2.949149844803756e-15
BLCA	Hypo	chr8	1757958	1807575	65	-9.403933283544934	57.30888722927558	66.71282051282051	0.006535754358757717	0.020572436179849465
BLCA	Hypo	chr8	1818149	1842659	24	-6.310742217599012	82.56624190938511	88.87698412698413	0.001177091442112111	0.005432511287721274
BLCA	Hypo	chr8	1908301	1914262	10	-19.204472954230237	58.05266990291262	77.25714285714285	0.007344822360302237	0.022521249793977068
BLCA	Hyper	chr8	1948999	1950965	7	19.09147348259692	38.01664355062413	18.92517006802721	0.00874125874125874	0.025413416370863178
BLCA	Hypo	chr8	1951383	2421548	153	-18.498162803416943	51.8644266768196	70.36258948023654	2.3968629139390196e-14	2.5832105658396304e-12
BLCA	Hypo	chr8	2538355	3047536	28	-22.784034244765866	56.14623786407767	78.93027210884354	3.994290805744635e-6	5.61843993484521e-5
BLCA	Hypo	chr8	3244626	4846849	37	-21.205251714960454	53.04185253214379	74.24710424710425	3.106827456256802e-6	4.494034725005113e-5
BLCA	Hyper	chr8	4848947	4852624	13	11.55372701731925	22.71489917849141	11.16117216117216	9.568678730073266e-4	0.004798134314713016
BLCA	Hypo	chr8	4852959	5992822	16	-19.61414268377254	55.98407160194175	75.59821428571429	0.00477526641652708	0.01602646430669527
BLCA	Hyper	chr8	6419438	6421063	9	14.875494426465302	64.72734627831716	49.851851851851855	0.015734265734265736	0.03967311545959254
BLCA	Hypo	chr8	6637707	6666420	23	-19.843474240688256	51.761080624736174	71.60455486542443	9.618371701911934e-4	0.004819893926852005
BLCA	Hypo	chr8	6734962	7465756	90	-13.68205938254482	54.183549083063646	67.86560846560846	4.2895214858255286e-6	5.965054550010735e-5
BLCA	Hypo	chr8	7569353	7923629	49	-17.580380140960685	59.017287497523284	76.59766763848397	4.089821430594627e-7	8.279183488600553e-6
BLCA	Hyper	chr8	9760855	9765691	25	14.473046694405918	25.91495145631068	11.441904761904762	4.1418826706414273e-7	8.362450183574723e-6
BLCA	Hypo	chr8	9951983	10001627	9	-9.595918734268249	79.47815533980582	89.07407407407408	6.170300287947346e-4	0.0033821731950840323
BLCA	Hypo	chr8	10222777	10448863	38	-13.656157992067548	49.673415942769545	63.32957393483709	0.011623071518917385	0.032027275211651364
BLCA	Hypo	chr8	10708248	10871371	22	-13.441316773841045	51.978596646072376	65.41991341991341	0.0173577664780696	0.0430400612735543
BLCA	Hypo	chr8	10966192	11055348	11	-7.994893456058505	83.83627537511033	91.83116883116884	5.670284308055206e-6	7.330473209664096e-5
BLCA	Hypo	chr8	11250222	11489852	51	-12.835844370110504	39.27993527508091	52.11577964519141	0.005597301641480394	0.018018743020869993
BLCA	Hyper	chr8	11536778	11539405	11	16.577134031017525	40.35635481023831	23.77922077922078	0.0020512253484389707	0.008443236345484132
BLCA	Hyper	chr8	11559334	11578850	43	16.78899891408358	40.84104764055091	24.05204872646733	8.94044758348752e-9	2.769728943677996e-7
BLCA	Hypo	chr8	11759863	12040795	53	-12.729232634618237	48.15396592782561	60.883198562443845	0.0021448895038219083	0.00869436774948586
BLCA	Hypo	chr8	12668973	12985953	33	-13.240207203799436	53.7944248308326	67.03463203463204	0.004137230233577006	0.014455413422338277
BLCA	Hypo	chr8	13424928	14711027	13	-24.095113624239836	58.794996265870054	82.89010989010988	3.5863315577947426e-5	3.359641189357773e-4
BLCA	Hypo	chr8	15873055	16857578	13	-13.542444610405777	60.867811799850635	74.41025641025641	0.01691383189431379	0.042048291635896407
BLCA	Hyper	chr8	16884197	16885270	7	15.459910177663296	20.75242718446602	5.292517006802721	0.0010703548657925608	0.005118285093563215
BLCA	Hyper	chr8	17270347	17271535	12	18.946948682385575	50.92313915857605	31.976190476190474	0.0011582172034453634	0.00541165953787313
BLCA	Hypo	chr8	19460443	19617535	30	-16.426098012020343	43.32152103559871	59.74761904761905	0.0081416614469582	0.02427903094003279
BLCA	Hypo	chr8	19799278	20032030	10	-20.114597780859917	60.17111650485437	80.28571428571429	0.009271688064257724	0.026677061843868304
BLCA	Hypo	chr8	20090225	20112959	20	-19.036991447064263	55.98919902912621	75.02619047619048	1.4595387473464566e-4	0.001068745501884697
BLCA	Hypo	chr8	20130023	21637096	48	-14.745985995530898	52.38000606796116	67.12599206349206	5.343298989375759e-4	0.0030452496308490504
BLCA	Hypo	chr8	21648365	21767310	8	-21.444463707813224	44.478155339805824	65.92261904761905	0.007381507381507382	0.022521249793977068
BLCA	Hyper	chr8	23559839	23571740	31	23.655313707067545	41.66606639523959	18.010752688172044	2.1679747052442086e-9	8.595514219963049e-8
BLCA	Hypo	chr8	23602677	24769018	43	-17.803742110978508	46.6901670806051	64.49390919158361	5.477097589644611e-4	0.0030771476325962234
BLCA	Hyper	chr8	24770342	24773268	20	16.75110957004161	31.858252427184464	15.107142857142858	3.265950937276565e-8	8.925377347157241e-7
BLCA	Hyper	chr8	25905134	25909599	20	17.37703421174295	40.63179611650485	23.254761904761903	1.234476852544148e-4	9.306617611495388e-4
BLCA	Hypo	chr8	26471364	26720681	24	-13.674015641855448	61.47876213592233	75.15277777777777	0.0029585148201569746	0.011064787587410151
BLCA	Hyper	chr8	26721736	26724817	14	18.871177597252494	36.843966712898755	17.972789115646258	8.365614234506413e-5	6.766773797298422e-4
BLCA	Hypo	chr8	26869910	27125756	13	-18.350919307229987	51.86519790888723	70.21611721611721	0.009549352921946811	0.027113784251850463
BLCA	Hypo	chr8	27751531	27846563	14	-17.38914206459283	56.641470180305134	74.03061224489795	0.012914689861836089	0.034537751405221286
BLCA	Hyper	chr8	30245145	30305588	11	14.226642289749087	73.05781112091792	58.83116883116883	0.0199877521858946	0.04740711977198525
BLCA	Hypo	chr8	33458593	35091548	28	-24.976392741562645	49.51170249653259	74.48809523809524	1.2010392470427137e-8	3.6182489442404906e-7
BLCA	Hyper	chr8	35092687	35094053	7	20.557955220923322	37.57836338418863	17.020408163265305	0.0034965034965034965	0.012496611282225482
BLCA	Hypo	chr8	35095362	36931380	49	-25.404549614575373	49.995839112343965	75.40038872691935	3.173706257626634e-10	1.608291409493974e-8
BLCA	Hyper	chr8	37820326	37824080	10	15.924075358298659	41.77645631067961	25.85238095238095	0.017731494511680268	0.04366958352216846
BLCA	Hyper	chr8	38964500	39172120	17	18.785428734600636	56.205596801827525	37.42016806722689	0.0038052838237635487	0.013474332170031779
BLCA	Hypo	chr8	39441968	39806701	20	-10.578363384188629	71.38592233009709	81.96428571428572	0.012233861341565556	0.03320805497894985
BLCA	Hypo	chr8	40181105	40705323	18	-15.360687316997998	57.14724919093851	72.5079365079365	0.008539085582558755	0.02526724009193333
BLCA	Hypo	chr8	40755864	41165144	34	-16.47309360637459	52.26920331239292	68.74229691876751	2.6506447558692e-4	0.0017455020371696319
BLCA	Hypo	chr8	41504763	41654618	92	-10.135593177752316	52.23190164626425	62.36749482401656	5.056041413939909e-4	0.0029309718863233473
BLCA	Hypo	chr8	42516025	42623946	24	-17.61449664817383	55.79621763754045	73.41071428571429	0.00862114365687573	0.025413416370863178
BLCA	Hypo	chr8	43146894	43278783	8	-20.05383148404993	58.51759708737864	78.57142857142857	0.005205905205905206	0.017054697240480313
BLCA	Hyper	chr8	49467831	49469775	11	22.495345269617115	46.69880847308032	24.203463203463205	0.01403253609135962	0.036270825755153356
BLCA	Hypo	chr8	49566696	49584227	6	-34.49183233163816	42.262135922330096	76.75396825396825	0.0010822510822510823	0.005118285093563215
BLCA	Hypo	chr8	49835988	50756867	31	-17.452418236320522	49.925461948011275	67.3778801843318	0.002170745032820088	0.008714869355267217
BLCA	Hypo	chr8	50824622	52321163	27	-13.193310046060855	71.80492628550881	84.99823633156966	0.0013023369456227132	0.005907221285065206
BLCA	Hyper	chr8	52721657	52722539	9	13.63191554939128	77.7588996763754	64.12698412698413	0.007095845331139449	0.022000570694440464
BLCA	Hypo	chr8	53235234	53322510	11	-21.234806455680243	58.752206531332746	79.98701298701299	0.0012233638394629107	0.00559879192558026
BLCA	Hypo	chr8	54506557	54507532	6	-8.203729388195407	84.30420711974111	92.5079365079365	0.0021645021645021645	0.00869436774948586
BLCA	Hyper	chr8	55366152	55372569	26	24.36657598065365	42.06254667662434	17.695970695970697	2.41821976861973e-10	1.2761529427226328e-8
BLCA	Hyper	chr8	55379034	55380185	8	27.841597318539065	43.62135922330097	15.779761904761905	7.77000777000777e-5	6.345368138324382e-4
BLCA	Hypo	chr8	55467175	55918395	16	-20.648896208969024	50.96419902912621	71.61309523809524	0.00477526641652708	0.01602646430669527
BLCA	Hyper	chr8	56013556	56015785	9	16.482829917295938	34.00134843581446	17.51851851851852	0.0030833771109948158	0.011470102894181978
BLCA	Hypo	chr8	56090701	56368202	25	-27.083148404993064	53.09970873786408	80.18285714285715	2.2607663079342013e-7	4.9710872954921e-6
BLCA	Hypo	chr8	56436393	56494607	9	-25.664085375250423	58.9549622437972	84.61904761904762	0.0013780337309749072	0.006148521346600577
BLCA	Hypo	chr8	57233269	57350090	13	-28.60812084355774	41.10250186706497	69.71062271062272	3.5863315577947426e-5	3.359641189357773e-4
BLCA	Hyper	chr8	57358130	57360738	21	23.29545604649627	43.59477577438742	20.299319727891156	1.7218512612829615e-8	4.971926736353669e-7
BLCA	Hypo	chr8	57361052	57871019	15	-21.596933271690556	48.57766990291262	70.17460317460318	0.009276863116429402	0.026677061843868304
BLCA	Hypo	chr8	58056501	58192065	35	-21.57837989564758	61.42434119278779	83.00272108843538	2.271871945083334e-9	8.917090215585513e-8
BLCA	Hypo	chr8	58910391	59057462	8	-21.444102519648634	53.5439927184466	74.98809523809524	0.014063714063714063	0.036270825755153356
BLCA	Hypo	chr8	59650783	60027867	18	-13.789913700107874	57.93230852211435	71.72222222222223	0.009194703472174442	0.0266305340533985
BLCA	Hypo	chr8	60034928	61149576	20	-25.286014794267224	53.109223300970875	78.3952380952381	7.991293813605822e-6	9.831090074230184e-5
BLCA	Hypo	chr8	62633628	63057336	21	-12.444994826409527	70.23300970873787	82.6780045351474	0.006294860162566356	0.019928949095555547
BLCA	Hyper	chr8	65285831	65291730	24	15.882387501926337	34.77326051779935	18.890873015873016	1.626631673537672e-5	1.783235754428405e-4
BLCA	Hypo	chr8	67090752	67104240	9	-14.214478347973495	47.75377562028047	61.96825396825397	0.012217194570135747	0.03317458227490374
BLCA	Hyper	chr8	67344553	67345006	9	25.844197873324088	35.54261057173679	9.698412698412698	2.0567667626491154e-5	2.1296859631652276e-4
BLCA	Hyper	chr8	67873343	67875646	13	22.826069561506454	33.93595967139657	11.10989010989011	1.9229659827317656e-7	4.353412928953689e-6
BLCA	Hypo	chr8	68870412	69242509	6	-33.175258129141625	44.00728155339806	77.18253968253968	0.004329004329004329	0.014748682602645202
BLCA	Hypo	chr8	69355417	70404585	39	-25.12608319404436	39.20114513318397	64.32722832722833	3.1523529377781685e-5	3.022782541338164e-4
BLCA	Hypo	chr8	70410637	70744526	20	-24.538239713361072	53.22366504854369	77.76190476190476	1.0031172433842069e-4	7.8619346868132e-4
BLCA	Hyper	chr8	70945169	70947440	7	19.59249719305198	32.60610263522885	13.013605442176871	2.913752913752914e-4	0.0018689050541523299
BLCA	Hyper	chr8	70981796	70984917	15	28.069517645245803	47.066343042071196	18.996825396825397	8.009131861267718e-6	9.837219422539418e-5
BLCA	Hypo	chr8	72518106	72667937	7	-25.895432930453733	48.614771151178914	74.51020408163265	0.01893939393939394	0.0457066423039958
BLCA	Hyper	chr8	72753888	72757004	20	24.596382339343506	41.17257281553398	16.576190476190476	2.5118514261039774e-7	5.4604224751555785e-6
BLCA	Hyper	chr8	72987499	72988022	11	16.16659311562224	25.712047661076788	9.545454545454545	5.670284308055206e-6	7.330473209664096e-5
BLCA	Hypo	chr8	73480179	73849114	11	-23.690539234228556	57.74669020300088	81.43722943722943	0.002618253779244491	0.010048189966056203
BLCA	Hyper	chr8	77585222	77586439	8	13.587566458622284	24.331614077669904	10.744047619047619	0.0014763014763014763	0.0064478646670427485
BLCA	Hypo	chr8	77598362	77806227	31	-20.425447034435447	63.46241778891325	83.88786482334869	2.1587427036587492e-7	4.788028744462826e-6
BLCA	Hypo	chr8	79885164	80523191	9	-20.738069553603534	51.029126213592235	71.76719576719577	0.007095845331139449	0.022000570694440464
BLCA	Hyper	chr8	85094437	85097429	18	17.799969178609956	33.27615965480043	15.476190476190476	4.5502351904329186e-6	6.151660720352066e-5
BLCA	Hyper	chr8	86350278	86351195	12	26.958699337340114	44.33171521035599	17.373015873015873	4.8502858430076044e-5	4.305613372470323e-4
BLCA	Hypo	chr8	86393055	87080395	29	-17.294079901796675	59.935805155674586	77.22988505747126	5.756670184572381e-5	5.028543407802267e-4
BLCA	Hypo	chr8	87586952	89281994	30	-23.679642471875482	62.28543689320389	85.96507936507936	9.699943075271868e-9	2.9710474781793074e-7
BLCA	Hypo	chr8	92086451	93111840	44	-12.155660278233094	49.83351721094439	61.989177489177486	0.013687505856335505	0.035724384346691423
BLCA	Hypo	chr8	93150831	94457064	54	-20.123313385044778	47.36169543329738	67.48500881834215	9.440329377895557e-7	1.6454988701516354e-5
BLCA	Hypo	chr8	94510681	94669067	13	-16.70402574771507	62.90403286034354	79.60805860805861	0.004300521123781321	0.014748682602645202
BLCA	Hypo	chr8	94944912	95238935	31	-13.271069154251114	48.317256498590666	61.58832565284178	0.01317643332520645	0.03461399713184552
BLCA	Hypo	chr8	96418790	97156397	17	-22.451599086236435	39.07781267846945	61.529411764705884	0.002125125463541146	0.008654316150620994
BLCA	Hyper	chr8	97169621	97172012	13	19.335804971727303	38.45668409260642	19.12087912087912	6.518854681460685e-5	5.579672933169705e-4
BLCA	Hypo	chr8	97507958	97657294	20	-13.527612112806288	55.712864077669906	69.24047619047619	0.007148636461399435	0.022137339620650943
BLCA	Hypo	chr8	98036431	98288910	14	-17.730912753450895	57.96636615811373	75.69727891156462	0.01551260575422643	0.03946225373382335
BLCA	Hyper	chr8	99984534	99986964	8	18.070576167360148	61.939623786407765	43.86904761904762	0.005205905205905206	0.017054697240480313
BLCA	Hypo	chr8	102252783	102514634	38	-17.041271260675963	27.560232498722534	44.6015037593985	0.0010768622477507867	0.005118285093563215
BLCA	Hypo	chr8	103439648	103597600	18	-14.12217470591257	59.63443905070119	73.75661375661376	0.0132990466819817	0.03491056782522263
BLCA	Hypo	chr8	105238428	105377722	20	-18.712251502542763	42.85679611650485	61.569047619047616	0.015205628019382434	0.03879742100844094
BLCA	Hyper	chr8	105478683	105479420	9	21.95136641495865	40.87729234088457	18.925925925925927	2.4681201151789385e-4	0.001646561039350413
BLCA	Hypo	chr8	105479674	105509494	9	-13.211730107361177	74.03694714131608	87.24867724867725	0.0019950637597696418	0.00830589112609211
BLCA	Hypo	chr8	105655901	106185570	10	-31.26004392048081	40.73519417475728	71.9952380952381	1.6237632336703542e-4	0.0011526007666090492
BLCA	Hypo	chr8	106334333	106877721	22	-19.818591602572187	55.78530450132392	75.6038961038961	3.025116688782816e-4	0.0019370872721812642
BLCA	Hypo	chr8	107676292	109091911	41	-18.00071603351262	52.93192043570921	70.93263646922183	3.5554793600732444e-5	3.358830625096354e-4
BLCA	Hyper	chr8	109093450	109096151	20	20.013574895977808	33.706432038834954	13.692857142857143	3.96891749602491e-5	3.659055021636459e-4
BLCA	Hypo	chr8	109143682	109145172	8	-26.889115233472033	58.08707524271845	84.97619047619048	5.439005439005439e-4	0.003057991889733256
BLCA	Hypo	chr8	109756409	109798825	6	-23.555709662505784	60.65857605177993	84.21428571428572	0.0010822510822510823	0.005118285093563215
BLCA	Hypo	chr8	109800338	110342871	16	-22.178752022653722	55.84208131067961	78.02083333333333	3.711392666137618e-4	0.0022737851626329106
BLCA	Hyper	chr8	110986371	110987019	6	16.469043766373865	28.103964401294498	11.634920634920634	0.004329004329004329	0.014748682602645202
BLCA	Hypo	chr8	115493513	116652764	13	-25.210747181620967	56.705003734129946	81.91575091575092	4.994904140145761e-4	0.002906540416760104
BLCA	Hypo	chr8	116684801	117650383	20	-18.722769301895514	56.529611650485435	75.25238095238095	0.001942502871070845	0.008120495209889594
BLCA	Hyper	chr8	117950244	117950504	7	14.30111947691698	32.93377253814147	18.632653061224488	0.0011655011655011655	0.00541165953787313
BLCA	Hypo	chr8	117952035	118369910	17	-24.801263223736097	47.88221016561965	72.68347338935574	2.040952736233279e-4	0.0014082389844596078
BLCA	Hypo	chr8	119038325	119065431	7	-8.123059903573077	82.27149791955617	90.39455782312925	0.013111888111888112	0.034537751405221286
BLCA	Hypo	chr8	121140957	121385077	9	-19.217868700878412	59.131337648327936	78.34920634920636	0.005306458247634718	0.017298740050645883
BLCA	Hypo	chr8	122166424	122480202	10	-14.649306518723995	67.2364077669903	81.88571428571429	0.014402779882656043	0.03688422746388355
BLCA	Hypo	chr8	124179875	124195402	10	-22.222595931576514	34.901213592233006	57.12380952380953	0.0057481218471930546	0.0183882225646828
BLCA	Hypo	chr8	129160931	130641185	35	-18.063228980912754	54.79119278779473	72.85442176870748	1.0777790109084056e-4	8.248050029714706e-4
BLCA	Hyper	chr8	132052044	132054713	14	19.335265174030777	33.512135922330096	14.17687074829932	2.9912804175827463e-7	6.3230049047909325e-6
BLCA	Hypo	chr8	132929147	133456013	35	-23.652357836338417	52.51907073509015	76.17142857142858	6.451233005863159e-6	8.172985920672996e-5
BLCA	Hypo	chr8	133495624	133787071	27	-16.623692231297408	38.0200467457749	54.64373897707231	0.01556846475861257	0.03956273368076724
BLCA	Hypo	chr8	133949499	134202370	34	-13.731571754915556	53.74321816105083	67.47478991596638	0.004573909322177821	0.01541151657124821
BLCA	Hypo	chr8	135863314	136409523	11	-28.700710292943302	43.939982347749336	72.64069264069263	0.0020512253484389707	0.008443236345484132
BLCA	Hypo	chr8	136667083	139508625	21	-25.098826585650443	35.787794729542306	60.88662131519274	2.817640710928528e-5	2.7465715566910953e-4
BLCA	Hypo	chr8	139510166	139915748	27	-19.02073594630229	53.48543689320388	72.50617283950618	4.641465644845019e-4	0.002736247697561948
BLCA	Hypo	chr8	139977703	140643009	20	-27.955149098474344	43.023422330097084	70.97857142857143	8.826898365999785e-5	7.080023720820791e-4
BLCA	Hyper	chr8	140714489	140717297	20	20.163274387424874	35.365655339805826	15.202380952380953	1.150218955630168e-5	1.321908129398555e-4
BLCA	Hyper	chr8	141107717	141111080	10	11.214424410540916	70.85728155339805	59.64285714285714	0.0057481218471930546	0.0183882225646828
BLCA	Hypo	chr8	142178276	142187200	25	-14.251964863615349	63.071844660194174	77.32380952380953	6.966892585343899e-4	0.003762220329079147
BLCA	Hypo	chr8	142200020	142204334	13	-10.298090259255305	72.19641523525019	82.49450549450549	0.0014347249197161703	0.006360669226922442
BLCA	Hypo	chr8	142238452	142247880	17	-20.467664735797232	52.63877784123358	73.10644257703082	0.0038052838237635487	0.013474332170031779
BLCA	Hypo	chr8	142321904	142424099	42	-15.725640094225394	45.13603791030975	60.86167800453515	1.8795338254414692e-4	0.0013194672323190938
BLCA	Hypo	chr8	142428968	142518658	53	-20.614544352271043	56.281232826525006	76.89577717879605	4.977028565046293e-10	2.33645537298983e-8
BLCA	Hypo	chr8	142532182	143057294	65	-20.89662327963299	45.294585511575804	66.1912087912088	2.039814202257792e-9	8.215083302987698e-8
BLCA	Hypo	chr8	143085750	143341034	83	-19.36787371399607	49.987834834483564	69.35570854847963	1.4040802017636985e-11	1.004114177934189e-9
BLCA	Hypo	chr8	143363105	143405955	34	-7.718759348399554	78.72101656196459	86.43977591036415	0.004740712267740075	0.015935125653733135
BLCA	Hypo	chr8	143459374	143523293	34	-14.65574433656958	58.71680468303826	73.37254901960785	0.003175258905121208	0.01174339349540236
BLCA	Hypo	chr8	143535580	143591042	46	-14.370562724878893	33.73295694385817	48.10351966873706	6.938190969991255e-4	0.003749367041128042
BLCA	Hypo	chr8	143596671	143719917	69	-18.811309440055748	45.40263120866751	64.21394064872325	4.658190059221686e-7	9.282414149261547e-6
BLCA	Hypo	chr8	143757498	143763565	11	-21.025774387424875	35.84002647837599	56.865800865800864	9.49772621599247e-5	7.511073601297785e-4
BLCA	Hypo	chr8	143862739	144099627	60	-16.445900755124054	46.531877022653724	62.977777777777774	1.6144087130662863e-7	3.765570583443366e-6
BLCA	Hypo	chr8	144107231	144239503	37	-15.01392585373168	45.11348727368145	60.12741312741313	7.976078956796878e-4	0.00418607381189367
BLCA	Hyper	chr8	144240945	144242268	8	15.256920365233471	29.69144417475728	14.43452380952381	0.014063714063714063	0.036270825755153356
BLCA	Hypo	chr8	144254866	144311936	29	-19.06484049930652	46.84156344158018	65.9064039408867	3.210972909417373e-5	3.071295587857717e-4
BLCA	Hypo	chr8	144330404	144371144	55	-9.470201319715883	58.41897616946161	67.88917748917748	0.005531265547954116	0.017836829836829837
BLCA	Hypo	chr8	145085954	145101998	11	-19.241110830916654	49.05759046778464	68.2987012987013	0.009615384615384616	0.027240623131034092
BLCA	Hyper	chr8	145103842	145107199	15	23.722807828633073	35.96407766990291	12.24126984126984	4.512707526525695e-8	1.1948525257084643e-6
BLCA	Hyper	chr8	145925258	145926089	8	21.806143088303283	38.72876213592233	16.922619047619047	0.002331002331002331	0.009198983928225806
BLCA	Hyper	chr9	841340	843179	9	19.035239122617764	29.405609492988134	10.37037037037037	0.009378856437679967	0.026748792195723854
BLCA	Hyper	chr9	968090	990260	29	20.577897077813383	42.22321727485772	21.645320197044335	8.84461705220005e-6	1.072567506869014e-4
BLCA	Hypo	chr9	8234760	8835149	8	-22.093489944521497	62.38865291262136	84.48214285714286	0.002331002331002331	0.009198983928225806
BLCA	Hypo	chr9	18490009	18793879	11	-13.00071449586013	72.91703442188879	85.91774891774892	0.011653851824130462	0.03203134847638157
BLCA	Hypo	chr9	27248473	27297335	6	-17.031264447526585	69.2544498381877	86.28571428571429	0.004329004329004329	0.014748682602645202
BLCA	Hypo	chr9	78547359	79007938	12	-16.407728463553706	65.63592233009709	82.0436507936508	0.005088340875775914	0.016920840346446073
BLCA	Hyper	chr9	79627216	79638117	24	20.831565919247957	41.0478357605178	20.216269841269842	4.85811304020968e-7	9.605757360125185e-6
BLCA	Hypo	chr9	82299929	84174038	11	-14.4372924809818	62.42850838481907	76.86580086580086	0.016798217262613546	0.0418317746595474
BLCA	Hypo	chr9	84371897	84646696	8	-16.427126675913087	66.6383495145631	83.06547619047619	0.018958818958818957	0.0457066423039958
BLCA	Hypo	chr9	89061100	89555718	17	-15.239155856517366	57.385494003426615	72.62464985994399	0.0030299529283908068	0.011298091781409263
BLCA	Hypo	chr9	89580839	90043268	23	-16.604203099559786	54.15977205571971	70.7639751552795	7.789946319135552e-4	0.0041024548681366305
BLCA	Hypo	chr9	94187181	94572995	26	-13.766159002809488	59.08915235250187	72.85531135531136	0.005204869535202695	0.017054697240480313
BLCA	Hyper	chr9	96714295	96718643	14	19.476000594412522	42.516816920943135	23.040816326530614	0.002355419595995491	0.009271435570245627
BLCA	Hypo	chr9	98368382	98515469	12	-10.157381722915705	74.27912621359224	84.43650793650794	0.008635596467067729	0.025413416370863178
BLCA	Hyper	chr9	100610697	100619991	15	23.284597010325164	41.716343042071195	18.43174603174603	1.075313736320694e-4	8.248050029714706e-4
BLCA	Hypo	chr9	104294981	104358101	9	-17.981365901268813	53.99217907227616	71.97354497354497	0.019991772932949403	0.04740711977198525
BLCA	Hyper	chr9	115822072	115851947	10	13.257385575589458	54.0002427184466	40.74285714285715	0.007344822360302237	0.022521249793977068
BLCA	Hypo	chr9	117014922	117093175	10	-13.422792417938048	62.55339805825243	75.97619047619048	0.010542735517629007	0.029389075475736666
BLCA	Hypo	chr9	117903983	118135710	6	-24.449298813376483	62.16181229773463	86.61111111111111	0.007575757575757576	0.022867730560038255
BLCA	Hyper	chr9	122131497	122132261	7	14.66006208308566	31.367545076282937	16.707482993197278	0.0034965034965034965	0.012496611282225482
BLCA	Hypo	chr9	125146434	125562629	22	-16.910336023200102	56.940313327449246	73.85064935064935	0.002312325679966188	0.009191644728883777
BLCA	Hyper	chr9	126775263	126794772	15	19.349098474341194	37.64433656957929	18.295238095238094	1.0205165734985965e-5	1.2069540680697466e-4
BLCA	Hypo	chr9	133769184	133838188	35	-15.292873654316095	38.68127600554785	53.97414965986395	0.002444381986535897	0.009566220669203524
BLCA	Hypo	chr9	133886309	133974575	16	-19.852519648636154	45.36771844660194	65.2202380952381	0.004231745108170972	0.014712091580065551
BLCA	Hypo	chr9	134638149	134724316	20	-18.014193250115582	51.10485436893204	69.11904761904762	0.0030724778246178836	0.011435116884229594
BLCA	Hyper	chr9	135458173	135466773	15	17.806534134689475	35.27637540453075	17.469841269841268	4.409559925919393e-6	6.020677454935953e-5
BLCA	Hypo	chr9	136078657	136100800	7	-23.682253483917837	47.753120665742024	71.43537414965986	0.005536130536130536	0.017836829836829837
BLCA	Hypo	chr9	136390861	136539392	50	-14.993631530282014	46.516844660194174	61.51047619047619	4.856636077173086e-4	0.0028369891080477507
BLCA	Hypo	chr9	137396107	137517397	10	-19.841192787794732	53.7873786407767	73.62857142857143	0.0057481218471930546	0.0183882225646828
BLCA	Hypo	chr9	137553680	137659754	23	-18.6095599911556	53.41114394259181	72.02070393374741	4.900350596835695e-4	0.0028558631201056157
BLCA	Hypo	chr9	137667199	137966584	51	-22.08412426459257	50.79916238339996	72.88328664799253	2.5911603691748265e-11	1.7092723400798082e-9
BLCA	Hypo	chr9	137984245	138377332	69	-17.089119044268898	49.79769945124525	66.88681849551415	4.2952758194666955e-6	5.965054550010735e-5
BLCA	Hypo	chr9	138413012	138605049	39	-19.838658913901632	44.68515060990789	64.52380952380952	1.9929687629344256e-7	4.472198526092148e-6
BLCA	Hypo	chr9	138619497	138696500	53	-21.588477743176405	51.18510716248397	72.77358490566037	1.4912162212800968e-10	8.268685887851668e-9
BLCA	Hypo	chr9	139143522	139159559	12	-16.705857990445367	54.95287216828479	71.65873015873017	0.008635596467067729	0.025413416370863178
BLCA	Hypo	chr9	139228737	139233849	7	-15.799914140413447	59.825936199722605	75.62585034013605	0.013111888111888112	0.034537751405221286
BLCA	Hypo	chr9	139237889	139253313	11	-18.077880048753833	54.77493380406002	72.85281385281385	0.006418761836718493	0.020245822578140938
BLCA	Hypo	chr9	139607602	139659112	46	-13.233203179963416	47.80302870409456	61.03623188405797	0.0029790997015605807	0.011136331664065248
BLCA	Hypo	chr9	140212617	140248465	9	-14.295384496840809	68.56175836030205	82.85714285714286	0.015734265734265736	0.03967311545959254
BLCA	Hypo	chr9	140265895	140284074	9	-11.935775928494374	78.08009708737865	90.01587301587301	9.255450431921019e-4	0.004696992715425895
BLCA	Hypo	chr9	140357706	140449460	45	-13.094567730004623	60.58797195253506	73.68253968253968	9.955334409692192e-5	7.829210575844261e-4
BLCA	Hypo	chr9	140920003	141022253	14	-17.976107918895714	48.91504854368932	66.89115646258503	0.013697770997542165	0.035724384346691423
BLCA	Hyper	chr10	711556	712394	8	14.451181807674525	71.54641990291262	57.095238095238095	0.005205905205905206	0.017054697240480313
BLCA	Hypo	chr10	743761	838112	51	-16.000514445260308	59.735246525794786	75.73576097105509	1.2784768947359747e-5	1.449319288669582e-4
BLCA	Hypo	chr10	1196452	1402293	124	-22.609406924373257	57.90633808330723	80.5157450076805	4.139039216000761e-24	2.262280577202702e-21
BLCA	Hypo	chr10	1406508	1453917	45	-22.478466122155442	59.25275080906149	81.73121693121693	4.5362357094195757e-10	2.1830990973885907e-8
BLCA	Hypo	chr10	1491207	1774873	145	-24.918072759736635	52.14859390693003	77.06666666666666	1.1863447949780555e-27	1.0086567079080089e-24
BLCA	Hypo	chr10	1781920	2540911	71	-26.73085926562612	54.72319841378367	81.45405767940979	1.3136559291114284e-17	2.451730529161134e-15
BLCA	Hypo	chr10	2544339	3088502	68	-26.00651328492562	55.12864077669903	81.13515406162465	6.726046455629776e-15	7.681747384847618e-13
BLCA	Hypo	chr10	3316292	3512917	66	-10.321603692962915	72.30898793762871	82.63059163059162	2.5996991478772347e-4	0.0017208389169166608
BLCA	Hypo	chr10	3984975	4331774	26	-9.163190369501049	79.03827483196416	88.2014652014652	0.0013922390757218418	0.006190246024069455
BLCA	Hypo	chr10	4445948	4868005	18	-9.218645656752452	74.68082524271846	83.8994708994709	0.002588307856963852	0.010013008959295954
BLCA	Hypo	chr10	5558309	5606380	23	-18.590755593077247	54.8440270156184	73.43478260869566	4.489642087603396e-4	0.002657028074774147
BLCA	Hypo	chr10	6297748	6620572	21	-18.78101952755212	60.169093851132686	78.9501133786848	1.0920970001815102e-4	8.315150492924294e-4
BLCA	Hypo	chr10	6691515	7412942	53	-19.960164080286813	56.58431031324418	76.544474393531	4.202502610155408e-8	1.1165815962815688e-6
BLCA	Hypo	chr10	7526744	7677769	37	-19.250915270332747	58.67829965888218	77.92921492921494	4.897402572673547e-6	6.528732488867244e-5
BLCA	Hypo	chr10	7714954	7791367	9	-23.370986798171266	59.967637540453076	83.33862433862434	0.002817770464829288	0.010626702610583398
BLCA	Hyper	chr10	8075716	8078357	10	19.959570041608874	42.40242718446602	22.442857142857143	0.017731494511680268	0.04366958352216846
BLCA	Hypo	chr10	8744491	11059443	48	-26.101503505933117	48.25960760517799	74.36111111111111	6.413232507084843e-11	3.864098830253009e-9
BLCA	Hyper	chr10	11059577	11060104	11	17.60553524145757	24.631509267431596	7.025974025974026	1.4175710770138016e-6	2.3177892908781214e-5
BLCA	Hypo	chr10	11069298	11206221	10	-25.749815071659732	48.859708737864075	74.60952380952381	0.014402779882656043	0.03688422746388355
BLCA	Hyper	chr10	11206320	11207969	13	10.270608840997191	20.274271844660195	10.003663003663004	3.5563969589609833e-4	0.0022017434894797284
BLCA	Hypo	chr10	11208339	11504551	51	-21.578213809795763	60.276127926898916	81.85434173669468	3.2645251807481685e-9	1.1893901315087176e-7
BLCA	Hypo	chr10	12866512	13039715	17	-12.370047047945391	69.54311821816106	81.91316526610645	0.0010849240216094784	0.005127757018749678
BLCA	Hypo	chr10	13424851	13627505	49	-9.169089133572985	49.166187834357046	58.33527696793003	0.02089004660424133	0.04857205609712995
BLCA	Hypo	chr10	13836757	13931592	9	-26.35892792931628	49.05906148867314	75.41798941798942	0.002817770464829288	0.010626702610583398
BLCA	Hypo	chr10	14065229	14188049	6	-33.80461165048544	50.36205501618123	84.16666666666667	0.0010822510822510823	0.005118285093563215
BLCA	Hypo	chr10	14247935	14520388	17	-18.998640232792148	48.95374071958881	67.95238095238095	0.0023960786323238377	0.00939282463859734
BLCA	Hypo	chr10	14816201	14821454	10	-22.81306056403144	57.039320388349516	79.85238095238095	1.0283833813245577e-4	7.972836508506095e-4
BLCA	Hypo	chr10	15252052	15296796	16	-13.290258032824779	69.64426577669903	82.93452380952381	0.015921028466757997	0.04006172634910628
BLCA	Hyper	chr10	15760947	15762312	12	20.887347819386655	36.419093851132686	15.531746031746032	7.211122435244121e-5	6.052745161543398e-4
BLCA	Hypo	chr10	16874865	17216609	19	-22.10271431004696	47.877235564639754	69.97994987468671	0.0015316373731520997	0.006636517089105248
BLCA	Hyper	chr10	17271006	17271994	9	27.54448553963117	35.391046386192016	7.8465608465608465	2.0567667626491154e-5	2.1296859631652276e-4
BLCA	Hypo	chr10	18240316	18348426	6	-26.503371089536138	42.55218446601942	69.05555555555556	0.0010822510822510823	0.005118285093563215
BLCA	Hyper	chr10	18429037	18430412	11	18.137393350985583	28.258605472197704	10.121212121212121	9.05702480294115e-5	7.219203520011008e-4
BLCA	Hypo	chr10	19002068	20078731	8	-28.030628756356915	44.89199029126213	72.92261904761905	0.007381507381507382	0.022521249793977068
BLCA	Hypo	chr10	20122964	21073164	12	-23.803696640468488	61.878843042071196	85.68253968253968	2.5886080536773765e-6	3.8594522155287666e-5
BLCA	Hyper	chr10	22622459	22625874	20	19.615106333795655	46.005582524271844	26.39047619047619	0.002565359773852302	0.00993930784279383
BLCA	Hyper	chr10	22633916	22635028	14	31.60935539264249	54.33044382801664	22.72108843537415	8.668131504452241e-6	1.0545078262650007e-4
BLCA	Hyper	chr10	23216637	23217173	8	15.541623324086917	28.982099514563107	13.44047619047619	9.324009324009324e-4	0.004696992715425895
BLCA	Hyper	chr10	23460245	23464290	17	23.03854940034266	43.39149057681325	20.352941176470587	4.424224085263248e-6	6.020677454935953e-5
BLCA	Hyper	chr10	23479993	23492914	31	18.397129882331885	34.20818979016599	15.811059907834101	8.231308696407704e-9	2.5920153969099483e-7
BLCA	Hyper	chr10	23982350	23984977	15	13.614932963476653	23.70064724919094	10.085714285714285	3.5605262384287734e-5	3.359450897220342e-4
BLCA	Hyper	chr10	25464418	25465503	13	16.07137522671503	28.093353248693056	12.021978021978022	6.441936042151415e-6	8.172985920672996e-5
BLCA	Hypo	chr10	25466027	26222654	12	-19.52236477115118	40.680016181229774	60.202380952380956	8.240889888326878e-4	0.004307328512669213
BLCA	Hyper	chr10	26500721	26507383	25	19.37439204808137	34.97058252427185	15.596190476190475	1.1312212956625302e-7	2.7306326039147257e-6
BLCA	Hyper	chr10	28034091	28036151	19	17.775385064603256	35.49718957588145	17.721804511278194	6.353609390800472e-7	1.2034113628318123e-5
BLCA	Hypo	chr10	30915918	31065098	25	-13.180161812297737	60.44650485436893	73.62666666666667	0.013476752997471572	0.035340683323047455
BLCA	Hypo	chr10	33635645	34021103	15	-17.334304207119743	51.26569579288026	68.6	0.013177022170029536	0.03461399713184552
BLCA	Hypo	chr10	35501529	35536010	10	-9.438684697179845	67.25655339805824	76.6952380952381	0.011615319664855269	0.032017444551683184
BLCA	Hypo	chr10	35947762	37106964	29	-25.55163645639039	44.530465349849344	70.08210180623973	2.8144868213479392e-5	2.7465715566910953e-4
BLCA	Hypo	chr10	44189889	44774998	53	-19.21693533614215	57.122687305367286	76.33962264150944	7.3167333547076e-8	1.841698803625742e-6
BLCA	Hypo	chr10	44810092	44879465	13	-23.293155873252964	46.15739357729649	69.45054945054945	0.002107570717074015	0.008596551773481004
BLCA	Hyper	chr10	44880128	44880819	9	21.535251964863615	30.947950377562027	9.412698412698413	2.0567667626491154e-5	2.1296859631652276e-4
BLCA	Hypo	chr10	44910229	45448095	34	-14.138529683718147	45.120573957738436	59.25910364145658	0.010386666480580262	0.029028039411760468
BLCA	Hypo	chr10	45567048	45693967	14	-12.779365629747046	65.36009015256587	78.13945578231292	0.00927700752307025	0.026677061843868304
BLCA	Hyper	chr10	45914276	45923705	14	25.827496532593617	67.75606796116504	41.92857142857143	5.072713041484074e-5	4.487445109067761e-4
BLCA	Hypo	chr10	48174700	48416510	46	-8.855650364831453	57.85552975939215	66.7111801242236	0.020963654072880807	0.048713598835616136
BLCA	Hypo	chr10	49517767	49656920	13	-10.836089476866178	70.95145631067962	81.7875457875458	0.0036219064284752807	0.012890617670089696
BLCA	Hypo	chr10	49816684	49893463	32	-11.48501069116967	41.263501213592235	52.748511904761905	0.004871968490622696	0.016315231024177188
BLCA	Hypo	chr10	50010529	50224628	15	-18.784365849899828	57.07912621359223	75.86349206349206	0.0028517539475876093	0.010738986814439166
BLCA	Hypo	chr10	50264253	50321116	7	-24.65183937652731	39.17128987517337	63.82312925170068	0.0020396270396270395	0.008427227919668524
BLCA	Hypo	chr10	50323825	50600744	52	-19.513011664710696	48.31207991038088	67.82509157509158	1.5458923195596439e-6	2.500881190120591e-5
BLCA	Hyper	chr10	50604330	50605707	6	26.432828633071352	42.53600323624595	16.103174603174605	0.0010822510822510823	0.005118285093563215
BLCA	Hyper	chr10	50817651	50820604	11	19.164943470768712	35.36407766990291	16.1991341991342	3.8274419079372643e-4	0.0023336721497638204
BLCA	Hypo	chr10	52840377	53367157	13	-20.267168106973934	53.99290515309933	74.26007326007326	0.004300521123781321	0.014748682602645202
BLCA	Hyper	chr10	57389676	57391271	10	19.01030975496995	33.29126213592233	14.280952380952382	0.001439736733854381	0.0063681303395686254
BLCA	Hypo	chr10	60274200	60898087	27	-15.963998904128353	54.84376123696512	70.80776014109347	8.952702195764337e-4	0.00463191867491472
BLCA	Hyper	chr10	60935910	60937501	17	20.849888499088955	37.317675613934895	16.467787114845937	2.431001405198517e-6	3.654621365929087e-5
BLCA	Hypo	chr10	62577628	62648096	6	-5.324741870858375	87.99271844660194	93.31746031746032	0.004329004329004329	0.014748682602645202
BLCA	Hypo	chr10	62757486	63211062	16	-10.867480062413316	60.41823422330097	71.28571428571429	0.007592377119473154	0.0228908076115873
BLCA	Hyper	chr10	63212206	63213510	11	13.817730004623208	34.41946160635481	20.6017316017316	0.009615384615384616	0.027240623131034092
BLCA	Hypo	chr10	76806873	76868766	27	-11.783843598568518	62.63061848256023	74.41446208112875	0.005090404401139422	0.016920840346446073
BLCA	Hyper	chr10	77155143	77157423	9	17.278227256382596	62.9819309600863	45.7037037037037	0.007095845331139449	0.022000570694440464
BLCA	Hyper	chr10	77352231	77472158	6	12.275042379411309	75.14805825242718	62.87301587301587	0.012987012987012988	0.034537751405221286
BLCA	Hypo	chr10	78457164	78959465	35	-19.76629680998613	60.947988904299585	80.71428571428571	8.734235776990306e-7	1.559054608706892e-5
BLCA	Hypo	chr10	79074256	79393414	32	-17.8987445099399	51.24560072815534	69.14434523809524	3.359231773482555e-5	3.193148016234598e-4
BLCA	Hyper	chr10	79395902	79398415	10	19.885009246417013	35.175485436893204	15.290476190476191	1.0283833813245577e-4	7.972836508506095e-4
BLCA	Hypo	chr10	79931578	80141181	27	-15.684868409787505	43.50737144911902	59.192239858906525	0.009534189073514769	0.027113784251850463
BLCA	Hypo	chr10	80327890	80394069	7	-19.310266825176672	53.907420249653256	73.21768707482993	0.01893939393939394	0.0457066423039958
BLCA	Hypo	chr10	80466414	80684576	23	-10.725190456089571	61.74271844660194	72.4679089026915	0.01903068381674156	0.04585100521590252
BLCA	Hypo	chr10	81271195	81447366	18	-15.247393024092052	60.678532901833876	75.92592592592592	0.002880500084665405	0.01082071784312793
BLCA	Hypo	chr10	83637420	85951128	51	-21.665143727393872	43.68779744907672	65.3529411764706	1.3116338117085026e-6	2.2058509730095523e-5
BLCA	Hypo	chr10	85956013	85991526	23	-19.437692214918894	50.88528915154073	70.32298136645963	7.334771882826474e-5	6.140664600370698e-4
BLCA	Hypo	chr10	86001154	86005121	16	-15.06103357605178	49.14729975728155	64.20833333333333	0.011715519449902533	0.03214311754415711
BLCA	Hypo	chr10	90343435	90488032	9	-10.373401140391431	71.22977346278317	81.60317460317461	0.019991772932949403	0.04740711977198525
BLCA	Hypo	chr10	90519680	90612228	11	-22.775480183247176	51.60547219770521	74.38095238095238	0.016798217262613546	0.0418317746595474
BLCA	Hyper	chr10	91295045	91295855	12	19.614954153182307	29.503843042071196	9.88888888888889	6.146350083283482e-5	5.320347379783394e-4
BLCA	Hypo	chr10	91605652	92395206	12	-18.405224225612578	61.89239482200647	80.29761904761905	0.008635596467067729	0.025413416370863178
BLCA	Hyper	chr10	94819559	94829090	33	17.92161910365794	53.36606354810238	35.44444444444444	0.0013285268247395315	0.0060117606522217
BLCA	Hypo	chr10	96443383	96980135	17	-15.694467107231242	58.22430039977156	73.9187675070028	0.006535384106063962	0.020572436179849465
BLCA	Hypo	chr10	97686634	97792309	6	-14.119201725997842	72.15857605177993	86.27777777777777	0.004329004329004329	0.014748682602645202
BLCA	Hypo	chr10	98031125	98145978	30	-16.62221451687471	42.42540453074434	59.04761904761905	0.0024971981103120706	0.009726767726961088
BLCA	Hypo	chr10	98792053	98862384	14	-14.15836965854303	63.426664355062414	77.58503401360544	0.010593445107511604	0.02951968024860845
BLCA	Hyper	chr10	100991959	100993662	15	14.08567575897673	28.806310679611652	14.72063492063492	8.706946836179432e-5	6.998482898155989e-4
BLCA	Hyper	chr10	101287059	101294643	30	17.871093388811836	34.32823624595469	16.457142857142856	4.604598523862455e-5	4.1113638161721704e-4
BLCA	Hypo	chr10	101541451	101601462	9	-15.488377767503982	69.92961165048544	85.41798941798942	0.008530525537756701	0.02525167559571152
BLCA	Hyper	chr10	102278918	102279954	11	20.281301223048793	59.0864960282436	38.80519480519481	2.764263600176913e-4	0.0018125231421211429
BLCA	Hyper	chr10	102419209	102419617	6	29.979734936045617	46.85275080906149	16.873015873015873	0.0010822510822510823	0.005118285093563215
BLCA	Hyper	chr10	102586168	102590401	20	17.159125057790106	30.13531553398058	12.976190476190476	2.267704323146774e-6	3.442951087444268e-5
BLCA	Hyper	chr10	102892528	102901943	29	25.30787778787444	45.866170070304655	20.558292282430212	2.8690672629424673e-10	1.4719286471077752e-8
BLCA	Hyper	chr10	102996197	103002111	17	19.2219004106497	44.664477441462026	25.442577030812323	9.025344473070524e-5	7.2140755930024e-4
BLCA	Hyper	chr10	104535020	104556332	16	21.873381877022652	59.66504854368932	37.791666666666664	7.350098378687748e-6	9.100801422931821e-5
BLCA	Hyper	chr10	105420501	105428818	11	20.75560038666835	63.57811120917917	42.82251082251082	0.00019704237970491842	0.001365732146288076
BLCA	Hypo	chr10	106176905	106396576	10	-19.172156726768378	42.99927184466019	62.17142857142857	0.017731494511680268	0.04366958352216846
BLCA	Hyper	chr10	106398816	106402908	20	23.927490753582987	34.637014563106796	10.709523809523809	1.9688562513924027e-8	5.600627522548203e-7
BLCA	Hypo	chr10	106468736	108921320	18	-29.82976318898649	47.27076591154261	77.1005291005291	4.5502351904329186e-6	6.151660720352066e-5
BLCA	Hypo	chr10	109023550	109671761	6	-29.327766219756512	55.521440129449836	84.84920634920636	0.0021645021645021645	0.00869436774948586
BLCA	Hypo	chr10	110226691	110668321	7	-22.056964533386168	60.90221914008322	82.95918367346938	0.0034965034965034965	0.012496611282225482
BLCA	Hypo	chr10	110673613	111213963	9	-27.331432680947245	46.377562028047464	73.70899470899471	0.0013780337309749072	0.006148521346600577
BLCA	Hypo	chr10	112455412	112553035	8	-23.61471336107258	51.66504854368932	75.2797619047619	0.007381507381507382	0.022521249793977068
BLCA	Hypo	chr10	112842008	114133900	44	-12.007649308620183	56.64386584289497	68.65151515151516	0.0031370257929306897	0.011618838996856553
BLCA	Hypo	chr10	115311837	115438230	22	-12.636657840541336	62.03000882612533	74.66666666666667	0.021155220187391136	0.04911400026514471
BLCA	Hypo	chr10	116031419	116119207	17	-15.651042941448424	60.276127926898916	75.92717086834733	0.013060922934975723	0.034537751405221286
BLCA	Hypo	chr10	116856408	118015561	30	-29.262286176606565	53.875809061488674	83.13809523809523	5.7836419911135125e-15	6.915066955625094e-13
BLCA	Hyper	chr10	118030292	118034031	30	15.869267221451688	26.474029126213594	10.604761904761904	2.2840429721050193e-9	8.917090215585513e-8
BLCA	Hypo	chr10	118034357	118368264	27	-19.563757469906335	55.32865875584322	74.89241622574956	2.7773406538063105e-5	2.728140010645172e-4
BLCA	Hypo	chr10	118429952	118498607	11	-16.174063800277395	61.47528684907326	77.64935064935065	0.011653851824130462	0.03203134847638157
BLCA	Hyper	chr10	118890977	118894180	17	27.388050365777378	46.166761850371216	18.77871148459384	4.156656730200179e-8	1.1082486863934415e-6
BLCA	Hyper	chr10	118896012	118900464	23	23.75518603389013	42.41357112705783	18.658385093167702	6.485145957566627e-9	2.1116739092468013e-7
BLCA	Hypo	chr10	118934495	118972582	16	-16.164658460471564	42.87105582524272	59.035714285714285	0.00848512293006265	0.025136724994517766
BLCA	Hyper	chr10	119292062	119296756	27	20.214773719628088	46.40524991010428	26.19047619047619	9.732632864883391e-7	1.689826323889279e-5
BLCA	Hyper	chr10	119306193	119311636	14	17.44601578495476	45.7997572815534	28.35374149659864	1.6875807022529327e-4	0.0011945760900684034
BLCA	Hyper	chr10	120354081	120355756	14	20.127848226669308	46.01560332871013	25.887755102040817	5.913512112192957e-4	0.003264804811147223
BLCA	Hyper	chr10	121577530	121578846	7	17.399808467076152	83.45423023578364	66.05442176870748	2.913752913752914e-4	0.0018689050541523299
BLCA	Hypo	chr10	122220743	122578241	14	-17.504524139752988	58.08391123439667	75.58843537414965	0.0015181885876838714	0.006581971146151265
BLCA	Hypo	chr10	123442240	123495011	8	-13.808974803513639	74.18507281553399	87.99404761904762	0.005205905205905206	0.017054697240480313
BLCA	Hyper	chr10	123922620	123924085	14	23.6356746582128	64.89077669902913	41.255102040816325	2.381865769843514e-5	2.398162746163496e-4
BLCA	Hypo	chr10	124266269	124575536	27	-19.259344874231605	61.3843941028407	80.6437389770723	4.5759158212815475e-5	4.0953108613387605e-4
BLCA	Hyper	chr10	124893156	124897153	24	16.64718176914779	27.1332928802589	10.48611111111111	1.0872125676232461e-10	6.162481901817096e-9
BLCA	Hyper	chr10	124901456	124903314	11	18.46694405917707	36.51456310679612	18.047619047619047	1.701085292416562e-5	1.8359244933105123e-4
BLCA	Hyper	chr10	124905786	124910040	24	17.30998613037448	34.60760517799353	17.297619047619047	5.541144816712236e-6	7.24800686110804e-5
BLCA	Hyper	chr10	125425583	125426048	6	21.440033132994298	41.122572815533985	19.682539682539684	0.0010822510822510823	0.005118285093563215
BLCA	Hypo	chr10	125426598	125648785	25	-21.69350901525659	53.62077669902912	75.31428571428572	7.080986655504871e-5	5.973948168459016e-4
BLCA	Hyper	chr10	125650718	125651549	7	16.32108183079057	40.60679611650485	24.285714285714285	0.0034965034965034965	0.012496611282225482
BLCA	Hypo	chr10	125792941	125807504	15	-15.731168130682692	67.8720064724919	83.60317460317461	7.040597348384631e-4	0.003780677256830821
BLCA	Hypo	chr10	127262277	127372281	6	-24.08816843889659	53.64199029126214	77.73015873015873	0.020562770562770564	0.04785472029997578
BLCA	Hypo	chr10	127462176	127465376	15	-18.00308213900447	60.63818770226537	78.64126984126985	1.6172899102564299e-4	0.0011526007666090492
BLCA	Hypo	chr10	127571375	128074961	41	-14.678224687933426	56.89320388349515	71.57142857142857	3.8501634696394186e-4	0.0023456569163758626
BLCA	Hypo	chr10	128077307	128275034	40	-16.934856102635226	47.25442961165049	64.18928571428572	1.6892444647227764e-4	0.0011946486732032056
BLCA	Hypo	chr10	129346391	129379217	6	-30.791917090460778	38.38268608414239	69.17460317460318	0.0010822510822510823	0.005118285093563215
BLCA	Hyper	chr10	129533731	129535968	17	28.191937940224634	56.40762421473444	28.215686274509803	5.956446242245617e-8	1.5294874713309886e-6
BLCA	Hypo	chr10	130087149	130337228	47	-22.511039139886485	50.55076430489568	73.06180344478217	2.1063442310525683e-9	8.438610500531022e-8
BLCA	Hypo	chr10	130341784	130834003	81	-22.299250012842244	54.891226177633946	77.19047619047619	6.019273212926973e-14	6.060457713857527e-12
BLCA	Hypo	chr10	131034796	131265073	60	-20.40429573123748	57.4703074433657	77.87460317460318	3.90326240720696e-10	1.914600252560747e-8
BLCA	Hypo	chr10	131325350	131365343	29	-5.059679244982225	86.58235687981252	91.64203612479474	9.428498671095596e-5	7.476359775256322e-4
BLCA	Hypo	chr10	131589141	131742209	133	-16.691974388120094	68.10179575151471	84.7937701396348	2.5410508256634764e-20	7.777648367190769e-18
BLCA	Hyper	chr10	131756487	131758786	13	16.542942494398805	42.38909634055265	25.846153846153847	0.0014347249197161703	0.006360669226922442
BLCA	Hyper	chr10	131766412	131771695	20	22.28924526121128	37.591626213592235	15.302380952380952	4.29454668982878e-6	5.965054550010735e-5
BLCA	Hypo	chr10	131772187	131875061	37	-16.724622333845634	59.947192337969035	76.67181467181467	9.583213044242535e-5	7.567672467961185e-4
BLCA	Hypo	chr10	132001420	132632962	56	-22.172732563899345	58.036451109570045	80.20918367346938	1.3867537094810538e-10	7.745576193393448e-9
BLCA	Hypo	chr10	132684009	133107407	99	-21.780494496513914	56.32580660978719	78.1063011063011	5.224382355193373e-17	8.158566077946875e-15
BLCA	Hyper	chr10	133109013	133110646	7	20.54322699953768	33.590846047156724	13.047619047619047	0.00058275058275058275	0.0032219707075198407
BLCA	Hypo	chr10	133111331	133218425	20	-20.48153028201572	48.894660194174755	69.37619047619047	9.78562247121516e-4	0.0048877012499829245
BLCA	Hypo	chr10	133273800	133461875	38	-22.489400077864566	57.500574859478796	79.98997493734336	3.704534193306862e-7	7.620187001931212e-6
BLCA	Hypo	chr10	133505972	133677277	48	-22.157425065495453	50.61539239482201	72.77281746031746	5.740924140430425e-8	1.4841064703572167e-6
BLCA	Hypo	chr10	133909949	133998913	101	-17.79266626385246	55.41101124675574	73.2036775106082	2.719158971984297e-10	1.4104045930261622e-8
BLCA	Hypo	chr10	134002714	134019775	20	-19.901410078594548	61.050970873786405	80.95238095238095	5.6795409119247205e-6	7.330473209664096e-5
BLCA	Hypo	chr10	134061604	134095934	30	-13.712975805208814	66.78543689320388	80.4984126984127	8.831515668873956e-4	0.0045816107049643055
BLCA	Hypo	chr10	134229731	134332442	64	-11.99344443481276	55.941823422330096	67.93526785714286	0.0026333899677577466	0.010092833304505718
BLCA	Hyper	chr10	134597884	134602530	44	25.646442756272855	38.980858340688435	13.334415584415584	1.9896464023601518e-17	3.3097335371434526e-15
BLCA	Hypo	chr10	134603703	134755601	198	-21.136152323045525	55.30276061586741	76.43891293891294	2.762792421717721e-29	4.2281775221968006e-26
BLCA	Hyper	chr10	134755679	134756707	8	15.939493758668515	30.385922330097088	14.446428571428571	5.439005439005439e-4	0.003057991889733256
BLCA	Hypo	chr10	134759693	134778176	18	-15.755901011968973	57.5165857605178	73.27248677248677	0.0018615990221104474	0.007848460450241951
BLCA	Hypo	chr10	134785521	134892649	183	-19.550240760530432	54.68681362406494	74.23705438459537	1.839102801762171e-25	1.172734553257011e-22
BLCA	Hypo	chr10	134894048	134900906	19	-19.143003138915248	50.57128257537047	69.71428571428571	1.0789725666158417e-4	8.248050029714706e-4
BLCA	Hyper	chr10	134901199	134902278	12	14.17771420866081	25.59041262135922	11.412698412698413	0.0022565266205056217	0.009007272665680239
BLCA	Hypo	chr10	134902618	134972969	99	-18.064162195230157	50.49764636657841	68.56180856180856	3.2809563827635666e-10	1.6517025158491325e-8
BLCA	Hypo	chr10	134975433	135040988	111	-22.098481630035028	54.89165136009796	76.99013299013299	5.450878921990646e-19	1.3454879197120137e-16
BLCA	Hyper	chr10	135043492	135045023	9	25.127857399702062	44.7680690399137	19.64021164021164	2.4681201151789385e-4	0.001646561039350413
BLCA	Hypo	chr10	135240975	135259199	7	-14.400898223367017	68.38141470180305	82.78231292517006	0.005536130536130536	0.017836829836829837
BLCA	Hypo	chr10	135267330	135272143	13	-15.499831075073795	71.05694548170275	86.55677655677655	9.568678730073266e-4	0.004798134314713016
BLCA	Hypo	chr10	135279147	135341025	21	-12.769092750368756	46.96786870087841	59.73696145124717	0.007863446929417484	0.023604235558624433
BLCA	Hyper	chr10	135341528	135343280	11	21.04613751943849	42.29721977052074	21.251082251082252	5.202485852640651e-4	0.0029975169175975817
BLCA	Hypo	chr11	131996	207155	18	-17.63388683412955	38.68621898597627	56.320105820105816	0.001483299868818485	0.006459994647808223
BLCA	Hypo	chr11	391037	394545	19	-22.726391220770374	46.193408277976495	68.91979949874687	1.9218075972271857e-5	2.0367966390557376e-4
BLCA	Hyper	chr11	503807	504937	8	18.180189551548775	57.95995145631068	39.779761904761905	0.0034965034965034965	0.012496611282225482
BLCA	Hyper	chr11	636460	640606	19	19.500973307054043	59.077414409810935	39.576441102756895	0.003414648499525416	0.01247636307416077
BLCA	Hypo	chr11	787342	788688	8	-18.227418515950067	59.07615291262136	77.30357142857143	0.010334110334110334	0.028891710733142957
BLCA	Hyper	chr11	829035	830527	8	17.161971220527047	49.769114077669904	32.607142857142854	0.007381507381507382	0.022521249793977068
BLCA	Hypo	chr11	855971	880784	22	-13.092038624805616	57.27592674315975	70.36796536796537	0.015863989354001923	0.0399444707261674
BLCA	Hypo	chr11	1024747	1289587	245	-16.236559200656686	57.19900931246285	73.43556851311953	5.0270999425082767e-20	1.3738345985740476e-17
BLCA	Hypo	chr11	1360038	1404215	25	-17.879375866851596	47.53776699029126	65.41714285714286	0.0014185488975112374	0.006299904912220538
BLCA	Hypo	chr11	1413145	1478112	78	-18.390761881053145	49.83756534727409	68.22832722832723	7.416557002456845e-8	1.8607047273049108e-6
BLCA	Hypo	chr11	1597444	1673835	41	-16.322874733601704	50.06736916883732	66.39024390243902	4.8073228214106636e-4	0.0028188225463168124
BLCA	Hypo	chr11	1674770	1707647	18	-13.734210458725023	62.19700647249191	75.93121693121694	0.004357014820484275	0.014797992634862707
BLCA	Hypo	chr11	1824939	1858737	45	-13.101836441156829	54.95636461704423	68.05820105820106	0.0016985590377728561	0.007273292533317233
BLCA	Hypo	chr11	1871101	1874320	9	-10.695741511275493	56.25134843581446	66.94708994708995	0.015734265734265736	0.03967311545959254
BLCA	Hypo	chr11	1937457	1961893	39	-13.416091729198527	57.401979088872295	70.81807081807082	8.433377195980049e-4	0.004398923129082436
BLCA	Hypo	chr11	1978156	2022386	126	-11.400842267867233	55.573836492525814	66.97467876039305	1.4547823482781705e-7	3.4358007805631364e-6
BLCA	Hypo	chr11	2025906	2158702	58	-12.283831125352718	55.036365918982256	67.32019704433498	7.144249166314967e-4	0.0038207282218326605
BLCA	Hypo	chr11	2162917	2289117	104	-12.62965321490807	47.24488890963406	59.874542124542124	1.1380806481630507e-5	1.313513291062393e-4
BLCA	Hypo	chr11	2293048	2296922	14	-15.646489663826696	42.38072122052704	58.02721088435374	0.0017592717229276658	0.007495516271627227
BLCA	Hypo	chr11	2309813	2323851	33	-12.760510794491378	43.47469844071786	56.23520923520923	3.509108187330783e-5	3.3232296843385093e-4
BLCA	Hypo	chr11	2366949	2398403	23	-16.736185651972903	49.83938370620515	66.57556935817806	2.7898113872509068e-5	2.729876820363675e-4
BLCA	Hypo	chr11	2425976	2465351	57	-14.59838917682556	46.865269971044114	61.46365914786968	1.4654806184331292e-4	0.001072070525071731
BLCA	Hypo	chr11	2466788	2482401	25	-11.945594082293113	62.33631067961165	74.28190476190477	0.001000545292694897	0.0049650924641383605
BLCA	Hypo	chr11	2597564	2603590	13	-7.823820192752231	80.01867064973861	87.84249084249085	0.008204334365325078	0.02441834561006126
BLCA	Hypo	chr11	2763171	2819073	23	-9.595217994331545	60.566272688898266	70.16149068322981	0.018434990144700174	0.04527103484828169
BLCA	Hyper	chr11	2890190	2891118	26	20.432034389558662	57.10969006721434	36.67765567765568	1.2696863661392782e-9	5.367756946794341e-8
BLCA	Hyper	chr11	3181446	3182119	6	29.058348744028354	49.54247572815534	20.484126984126984	0.007575757575757576	0.022867730560038255
BLCA	Hypo	chr11	3184019	3254504	83	-10.135448868984955	51.123874137326005	61.25932300631096	9.766976019531491e-4	0.004881574167306007
BLCA	Hypo	chr11	4388493	4615063	28	-13.556246284921736	57.984570041608876	71.54081632653062	0.002707676012963183	0.010344052347076523
BLCA	Hypo	chr11	4658391	5668206	141	-23.52569979310322	52.14366866349928	75.6693684566025	3.1155442576578317e-22	1.1920072329798866e-19
BLCA	Hypo	chr11	5728046	6220344	35	-16.90649891024371	60.5873786407767	77.4938775510204	2.1785820427965557e-5	2.2168231105690483e-4
BLCA	Hyper	chr11	6518108	6519453	12	15.272335876098012	81.39138349514563	66.11904761904762	0.005022269425284637	0.01675257438634614
BLCA	Hyper	chr11	6589761	6592745	6	11.850824472183694	76.668284789644	64.81746031746032	0.020562770562770564	0.04785472029997578
BLCA	Hypo	chr11	6789940	6947353	23	-19.379238778668917	58.82365977205572	78.20289855072464	2.4937785692629574e-5	2.484686668229186e-4
BLCA	Hyper	chr11	8133258	8190659	7	15.369361336767719	33.92718446601942	18.5578231292517	0.013111888111888112	0.034537751405221286
BLCA	Hypo	chr11	8199971	8264034	7	-11.069959051581796	45.34500693481276	56.414965986394556	0.01893939393939394	0.0457066423039958
BLCA	Hypo	chr11	8941146	8964717	15	-10.484211742949606	71.82055016181229	82.3047619047619	0.004320904563198277	0.014748682602645202
BLCA	Hyper	chr11	13983986	13984996	6	20.057867159808907	40.28802588996764	20.23015873015873	0.020562770562770564	0.04785472029997578
BLCA	Hyper	chr11	14926377	14927549	6	22.966578055170288	53.641181229773466	30.674603174603174	0.0021645021645021645	0.00869436774948586
BLCA	Hypo	chr11	15139573	15914332	41	-12.82937823483644	49.881423158891785	62.710801393728225	0.003978859426942258	0.013954074500181886
BLCA	Hyper	chr11	16632088	16633070	6	22.955154877484976	59.978964401294505	37.023809523809526	0.0021645021645021645	0.00869436774948586
BLCA	Hypo	chr11	17499932	17564696	9	-17.664830225509835	63.05474649406688	80.71957671957672	0.015734265734265736	0.03967311545959254
BLCA	Hyper	chr11	17740430	17742502	10	17.148451225150254	31.443689320388348	14.295238095238094	0.0010446210136612613	0.005118285093563215
BLCA	Hypo	chr11	17760956	17824006	21	-14.628415120093345	70.49630143319463	85.12471655328798	0.001495711594016789	0.006491880384240765
BLCA	Hypo	chr11	18955977	18978218	7	-15.154068423485901	62.89355062413315	78.04761904761905	0.013111888111888112	0.034537751405221286
BLCA	Hyper	chr11	20177746	20186078	35	17.67470774717654	32.997156726768374	15.322448979591837	1.6082101424654225e-8	4.6790965818043394e-7
BLCA	Hyper	chr11	20617937	20621109	20	20.723422330097087	36.52342233009709	15.8	5.6795409119247205e-6	7.330473209664096e-5
BLCA	Hyper	chr11	20622198	20627781	16	10.422192845584837	29.594811893203882	19.172619047619047	0.007592377119473154	0.0228908076115873
BLCA	Hyper	chr11	20690223	20692867	18	13.609107720758207	24.005933117583602	10.396825396825397	3.7124515377748694e-6	5.260681327232093e-5
BLCA	Hypo	chr11	20693928	22201921	10	-23.294267221451687	43.50097087378641	66.79523809523809	0.011615319664855269	0.032017444551683184
BLCA	Hyper	chr11	22454152	22454661	6	23.566150408383418	46.59789644012945	23.03174603174603	0.0010822510822510823	0.005118285093563215
BLCA	Hypo	chr11	22689281	22696308	6	-20.666435506241328	52.2621359223301	72.92857142857143	0.020562770562770564	0.04785472029997578
BLCA	Hypo	chr11	23043633	23997506	25	-10.48991215903837	74.07961165048543	84.56952380952382	6.005574917669864e-4	0.0033084707897775233
BLCA	Hypo	chr11	24101781	26986089	48	-11.363396228232395	43.13263551779935	54.49603174603175	0.01834349979879583	0.04511281770141267
BLCA	Hypo	chr11	27536073	27720709	16	-16.048796521035598	61.555370145631066	77.60416666666667	0.00848512293006265	0.025136724994517766
BLCA	Hyper	chr11	27743258	27744816	12	17.538777161349977	29.43163430420712	11.892857142857142	4.437613806304074e-6	6.020677454935953e-5
BLCA	Hypo	chr11	28658101	30037031	19	-21.243880331897707	47.87391415431783	69.11779448621554	9.954985256044404e-4	0.004949678179288615
BLCA	Hyper	chr11	30037696	30040242	18	15.57354112087122	31.298408845738944	15.724867724867725	7.382810039206799e-9	2.3637348292891392e-7
BLCA	Hyper	chr11	31817810	31830524	51	24.399574392863943	45.04383209594518	20.644257703081234	1.106550475565443e-13	1.0718131948135152e-11
BLCA	Hyper	chr11	31838674	31849262	44	22.667307611482368	44.06774051191527	21.4004329004329	2.346837018886891e-11	1.5747012761986982e-9
BLCA	Hyper	chr11	32447944	32461240	65	16.779467619758883	39.997050037341296	23.217582417582417	6.897408205791533e-10	3.1604172210010065e-8
BLCA	Hypo	chr11	34460172	34461028	12	-1.9535752812451839	3.895631067961165	5.849206349206349	0.012092127821028078	0.03296364876612286
BLCA	Hypo	chr11	34533294	34847603	30	-19.746016335336723	43.61747572815534	63.36349206349206	1.578235485450958e-5	1.73764862369363e-4
BLCA	Hypo	chr11	35815134	36294323	43	-11.78501811652636	58.26038609166855	70.04540420819491	0.0011483989096929559	0.005404396345000306
BLCA	Hypo	chr11	40316470	43094025	24	-20.114063222376327	42.350222491909385	62.464285714285715	0.0020987450133998263	0.008596551773481004
BLCA	Hypo	chr11	43537818	43544040	6	-15.352673755586375	71.56796116504854	86.92063492063491	0.007575757575757576	0.022867730560038255
BLCA	Hypo	chr11	43580581	43594537	7	-26.683739515223564	40.85367545076283	67.53741496598639	0.013111888111888112	0.034537751405221286
BLCA	Hyper	chr11	43601969	43603991	15	24.082485745107103	35.42216828478964	11.33968253968254	6.44672503789385e-9	2.1081341876052879e-7
BLCA	Hyper	chr11	44332332	44333192	26	16.952203136669155	36.75989544436146	19.807692307692307	7.769930977125481e-7	1.4122449367449926e-5
BLCA	Hypo	chr11	44750083	44968719	39	-15.337669073105967	51.57686084142395	66.91452991452991	2.096045595739862e-4	0.0014384700357490065
BLCA	Hypo	chr11	44995262	45115819	18	-17.998542405095804	48.52791262135922	66.52645502645503	0.0077863655652605	0.023429519978518814
BLCA	Hypo	chr11	45672529	45674702	6	-12.929264909847435	74.7135922330097	87.64285714285714	0.012987012987012988	0.034537751405221286
BLCA	Hypo	chr11	45687890	45765692	84	-20.45157739471193	58.04218677762367	78.4937641723356	2.394220433651084e-13	2.207298163650373e-11
BLCA	Hypo	chr11	45926170	45929369	11	-19.430651872399444	47.23168578993822	66.66233766233766	0.005191145284024541	0.017054697240480313
BLCA	Hypo	chr11	46366643	46367100	7	-15.485519450498646	31.242371705963937	46.72789115646258	2.913752913752914e-4	0.0018689050541523299
BLCA	Hyper	chr11	46382725	46383924	6	16.50111727538912	50.35032362459547	33.84920634920635	0.020562770562770564	0.04785472029997578
BLCA	Hypo	chr11	49071763	49226370	8	-20.47639274156265	56.70813106796116	77.18452380952381	0.018958818958818957	0.0457066423039958
BLCA	Hypo	chr11	49230548	49456196	8	-18.35225959315765	65.35012135922331	83.70238095238095	0.007381507381507382	0.022521249793977068
BLCA	Hypo	chr11	49914985	50234973	25	-21.033509015256588	53.960776699029125	74.99428571428571	7.080986655504871e-5	5.973948168459016e-4
BLCA	Hypo	chr11	55028287	55638302	22	-30.307306770899004	39.400485436893206	69.70779220779221	3.40293309557127e-6	4.8671484200581975e-5
BLCA	Hypo	chr11	55641711	57016682	76	-21.00159531109327	47.89815406234032	68.89974937343358	8.755021424151793e-10	3.940789643388795e-8
BLCA	Hypo	chr11	57115016	57192432	24	-19.03667263831099	48.17364482200647	67.21031746031746	0.001468396756494992	0.0064478646670427485
BLCA	Hypo	chr11	57308142	57313734	7	-17.49014265900535	63.999653259362	81.48979591836735	0.0034965034965034965	0.012496611282225482
BLCA	Hypo	chr11	57519282	58294523	66	-18.465469535857885	50.134819064430715	68.60028860028861	1.577121152455978e-5	1.73764862369363e-4
BLCA	Hypo	chr11	58420680	58500455	8	-26.602013985205737	52.90989077669903	79.51190476190476	0.0014763014763014763	0.0064478646670427485
BLCA	Hypo	chr11	58981043	59323070	25	-17.424526121128064	44.457378640776696	61.881904761904764	0.002416612725645212	0.009468469317274533
BLCA	Hypo	chr11	59624274	59861219	34	-13.395093959914062	61.228155339805824	74.62324929971989	7.221822251080438e-4	0.0038429335094066416
BLCA	Hypo	chr11	60049447	60383361	41	-12.009178760303552	63.07909069381956	75.08826945412311	5.285987590393287e-4	0.0030275731318629815
BLCA	Hypo	chr11	60466573	60534360	20	-19.766458622283867	47.98592233009709	67.75238095238095	0.001942502871070845	0.008120495209889594
BLCA	Hypo	chr11	61956390	62124229	36	-18.685541557507577	40.880596008629986	59.56613756613756	0.0011745260487688051	0.005431041771759275
BLCA	Hypo	chr11	62697247	62783272	14	-21.549872861766065	45.49774618585298	67.04761904761905	0.0027161451039192028	0.01037122871017452
BLCA	Hypo	chr11	62911616	63230511	16	-22.19717984281091	55.023058252427184	77.22023809523809	1.1447886363419709e-4	8.681786566193024e-4
BLCA	Hypo	chr11	64322994	64394492	48	-15.949322892587457	61.06158980582524	77.0109126984127	5.760611195054758e-7	1.0992567796648131e-5
BLCA	Hypo	chr11	64412079	64478343	19	-13.471287441905734	59.21793561573838	72.68922305764411	0.013672661483997754	0.035724384346691423
BLCA	Hyper	chr11	64739253	64739714	7	22.53181758140149	48.259708737864074	25.727891156462587	2.913752913752914e-4	0.0018689050541523299
[truncated: 31,186 more rows]

## Sheet: Supplementary Data 6
Supplementary Data 6: Refined catalog of DMRs across 14 TCGA tumor types. Coordinates are hg19 based.
dmr_id	chr	start	end	n_hyper	n_hypo	n_hypoway	support
chr1:809468-834295	1	809468	834295	1	0	5	BLCA_hypoway,COAD_hypoway,HNSC_hypoway,KIRP_hyper,LIHC_hypoway,UCEC_hypoway
chr1:848378-855445	1	848378	855445	1	7	0	BLCA_hypo,ESCA_hypo,HNSC_hypo,LIHC_hypo,LUAD_hypo,LUSC_hypo,PRAD_hyper,UCEC_hypo
chr1:903542-910223	1	903542	910223	7	0	0	BRCA_hyper,COAD_hyper,HNSC_hyper,KIRP_hyper,LUAD_hyper,PAAD_hyper,PRAD_hyper
chr1:911994-919422	1	911994	919422	0	9	0	BLCA_hypo,COAD_hypo,ESCA_hypo,HNSC_hypo,LIHC_hypo,LUAD_hypo,LUSC_hypo,PRAD_hypo,UCEC_hypo
chr1:942160-943431	1	942160	943431	1	10	0	BLCA_hypo,COAD_hypo,ESCA_hypo,KIRC_hypo,KIRP_hypo,LIHC_hypo,LUAD_hypo,LUSC_hypo,PAAD_hypo,PRAD_hyper,UCEC_hypo
chr1:967560-970294	1	967560	970294	8	0	0	BLCA_hyper,COAD_hyper,HNSC_hyper,KIRP_hyper,LIHC_hyper,LUAD_hyper,PRAD_hyper,UCEC_hyper
chr1:977895-991567	1	977895	991567	0	0	1	LUSC_hypoway
chr1:1017018-1050110	1	1017018	1050110	0	0	1	LUSC_hypoway
chr1:1062792-1067223	1	1062792	1067223	0	1	0	HNSC_hypo
chr1:1096716-1097270	1	1096716	1097270	2	3	0	BRCA_hyper,LIHC_hypo,LUSC_hypo,PAAD_hypo,UCEC_hyper
chr1:1098069-1100557	1	1098069	1100557	0	5	0	BLCA_hypo,BRCA_hypo,LUAD_hypo,LUSC_hypo,UCEC_hypo
chr1:1103224-1105317	1	1103224	1105317	3	2	0	BRCA_hyper,KIRP_hyper,LIHC_hypo,PAAD_hypo,UCEC_hyper
chr1:1216346-1228011	1	1216346	1228011	0	0	8	BLCA_hypoway,HNSC_hypoway,KIRP_hypoway,LIHC_hypoway,LUAD_hypoway,LUSC_hypoway,PAAD_hypoway,UCEC_hypoway
chr1:1266547-1268144	1	1266547	1268144	0	8	0	BLCA_hypo,ESCA_hypo,HNSC_hypo,LIHC_hypo,LUAD_hypo,LUSC_hypo,PAAD_hypo,UCEC_hypo
chr1:1288925-1290712	1	1288925	1290712	1	4	0	BLCA_hypo,LUSC_hypo,PAAD_hyper,PRAD_hypo,UCEC_hypo
chr1:1293867-1297576	1	1293867	1297576	3	2	0	BRCA_hyper,COAD_hypo,KIRP_hyper,PAAD_hypo,UCEC_hyper
chr1:1355234-1357361	1	1355234	1357361	2	2	0	BLCA_hypo,BRCA_hyper,LUSC_hypo,PRAD_hyper
chr1:1449201-1474399	1	1449201	1474399	0	0	1	LUSC_hypoway
chr1:1475142-1476551	1	1475142	1476551	7	0	0	BLCA_hyper,BRCA_hyper,ESCA_hyper,HNSC_hyper,LUAD_hyper,LUSC_hyper,UCEC_hyper
chr1:1476844-1496936	1	1476844	1496936	0	0	1	LUSC_hypoway
chr1:1565855-1567131	1	1565855	1567131	8	0	0	BLCA_hyper,BRCA_hyper,COAD_hyper,HNSC_hyper,KIRP_hyper,LUAD_hyper,PRAD_hyper,UCEC_hyper
chr1:1845395-1846340	1	1845395	1846340	2	3	0	BLCA_hypo,KIRC_hypo,KIRP_hyper,LUSC_hypo,PRAD_hyper
chr1:1854472-1858286	1	1854472	1858286	0	8	0	BLCA_hypo,ESCA_hypo,HNSC_hypo,LIHC_hypo,LUAD_hypo,LUSC_hypo,PAAD_hypo,UCEC_hypo
chr1:1901072-1912065	1	1901072	1912065	0	0	6	BLCA_hypoway,COAD_hypoway,HNSC_hypoway,LIHC_hypoway,LUSC_hypoway,UCEC_hypoway
chr1:1935047-1935561	1	1935047	1935561	4	0	0	BRCA_hyper,LUSC_hyper,PAAD_hyper,PRAD_hyper
chr1:1936610-1949354	1	1936610	1949354	1	0	6	BLCA_hypoway,ESCA_hypoway,HNSC_hypoway,LIHC_hypoway,LUSC_hypoway,PRAD_hyper,UCEC_hypoway
chr1:1959441-1962082	1	1959441	1962082	0	6	0	BLCA_hypo,HNSC_hypo,LIHC_hypo,LUAD_hypo,LUSC_hypo,UCEC_hypo
chr1:2003576-2004636	1	2003576	2004636	4	1	0	BLCA_hyper,KIRC_hyper,KIRP_hyper,PAAD_hypo,UCEC_hyper
chr1:2013506-2014628	1	2013506	2014628	2	4	0	BRCA_hypo,KIRC_hyper,KIRP_hyper,LIHC_hypo,PRAD_hypo,UCEC_hypo
chr1:2125048-2125243	1	2125048	2125243	0	5	0	BLCA_hypo,BRCA_hypo,LUAD_hypo,PAAD_hypo,UCEC_hypo
chr1:2138441-2139327	1	2138441	2139327	4	1	0	BRCA_hyper,ESCA_hyper,PAAD_hypo,PRAD_hyper,UCEC_hyper
chr1:2198759-2206662	1	2198759	2206662	7	0	0	BLCA_hyper,BRCA_hyper,ESCA_hyper,HNSC_hyper,KIRP_hyper,LUSC_hyper,UCEC_hyper
chr1:2230600-2232481	1	2230600	2232481	5	0	0	BRCA_hyper,KIRP_hyper,LUAD_hyper,LUSC_hyper,PRAD_hyper
chr1:2236182-2238334	1	2236182	2238334	3	0	0	BLCA_hyper,BRCA_hyper,UCEC_hyper
chr1:2266137-2267226	1	2266137	2267226	2	4	0	BLCA_hypo,BRCA_hyper,COAD_hypo,LIHC_hypo,PAAD_hypo,PRAD_hyper
chr1:2268472-2270807	1	2268472	2270807	0	6	0	BLCA_hypo,HNSC_hypo,LIHC_hypo,LUAD_hypo,LUSC_hypo,UCEC_hypo
chr1:2287740-2310327	1	2287740	2310327	0	0	8	BLCA_hypoway,COAD_hypoway,ESCA_hypoway,HNSC_hypoway,LIHC_hypoway,LUAD_hypoway,LUSC_hypoway,UCEC_hypoway
chr1:2344978-2345410	1	2344978	2345410	0	5	0	BLCA_hypo,LUAD_hypo,LUSC_hypo,PRAD_hypo,UCEC_hypo
chr1:2357637-2360074	1	2357637	2360074	1	5	0	BLCA_hypo,ESCA_hypo,LIHC_hypo,LUSC_hypo,PRAD_hyper,UCEC_hypo
chr1:2361881-2373855	1	2361881	2373855	0	0	4	COAD_hypoway,LIHC_hypoway,LUAD_hypoway,UCEC_hypoway
chr1:2376118-2410006	1	2376118	2410006	0	0	4	COAD_hypoway,LIHC_hypoway,LUAD_hypoway,UCEC_hypoway
chr1:2425859-2429005	1	2425859	2429005	0	10	0	BLCA_hypo,COAD_hypo,ESCA_hypo,HNSC_hypo,KIRC_hypo,KIRP_hypo,LIHC_hypo,LUAD_hypo,LUSC_hypo,UCEC_hypo
chr1:2461277-2467281	1	2461277	2467281	4	0	0	BRCA_hyper,LUAD_hyper,LUSC_hyper,PRAD_hyper
chr1:2483718-2500814	1	2483718	2500814	0	0	2	LIHC_hypoway,LUSC_hypoway
chr1:2526949-2541236	1	2526949	2541236	0	0	7	BLCA_hypoway,COAD_hypoway,ESCA_hypoway,HNSC_hypoway,LIHC_hypoway,LUAD_hypoway,LUSC_hypoway
chr1:2561121-2572713	1	2561121	2572713	0	0	7	BLCA_hypoway,HNSC_hypoway,LIHC_hypoway,LUAD_hypoway,LUSC_hypoway,PAAD_hypoway,PRAD_hypoway
chr1:2724825-2764669	1	2724825	2764669	0	0	10	BLCA_hypoway,BRCA_hypoway,COAD_hypoway,ESCA_hypoway,HNSC_hypoway,LIHC_hypoway,LUAD_hypoway,LUSC_hypoway,PRAD_hypoway,UCEC_hypoway
chr1:2776971-2780395	1	2776971	2780395	0	8	0	BLCA_hypo,ESCA_hypo,HNSC_hypo,LIHC_hypo,LUAD_hypo,LUSC_hypo,PRAD_hypo,UCEC_hypo
chr1:2793655-2822012	1	2793655	2822012	0	0	10	BLCA_hypoway,BRCA_hypoway,COAD_hypoway,ESCA_hypoway,HNSC_hypoway,LIHC_hypoway,LUAD_hypoway,LUSC_hypoway,PRAD_hypoway,UCEC_hypoway
chr1:2823860-2827833	1	2823860	2827833	0	10	0	BLCA_hypo,BRCA_hypo,COAD_hypo,ESCA_hypo,HNSC_hypo,LIHC_hypo,LUAD_hypo,LUSC_hypo,PRAD_hypo,UCEC_hypo
chr1:2829699-2837518	1	2829699	2837518	0	7	0	BLCA_hypo,BRCA_hypo,ESCA_hypo,LIHC_hypo,LUAD_hypo,LUSC_hypo,UCEC_hypo
chr1:2863097-2878813	1	2863097	2878813	0	0	10	BLCA_hypoway,BRCA_hypoway,COAD_hypoway,ESCA_hypoway,HNSC_hypoway,LIHC_hypoway,LUAD_hypoway,LUSC_hypoway,PRAD_hypoway,UCEC_hypoway
chr1:2887079-2925740	1	2887079	2925740	0	0	12	BLCA_hypoway,BRCA_hypoway,COAD_hypoway,ESCA_hypoway,HNSC_hypoway,KIRC_hypoway,LIHC_hypoway,LUAD_hypoway,LUSC_hypoway,PAAD_hypoway,PRAD_hypoway,UCEC_hypoway
chr1:2938645-2976777	1	2938645	2976777	0	0	10	BLCA_hypoway,BRCA_hypoway,COAD_hypoway,ESCA_hypoway,HNSC_hypoway,LIHC_hypoway,LUAD_hypoway,LUSC_hypoway,PRAD_hypoway,UCEC_hypoway
chr1:2980037-2980937	1	2980037	2980937	9	0	0	BLCA_hyper,BRCA_hyper,COAD_hyper,HNSC_hyper,KIRC_hyper,KIRP_hyper,LUAD_hyper,LUSC_hyper,UCEC_hyper
chr1:2983925-2984869	1	2983925	2984869	9	0	0	BLCA_hyper,BRCA_hyper,COAD_hyper,ESCA_hyper,HNSC_hyper,LUAD_hyper,LUSC_hyper,PRAD_hyper,UCEC_hyper
chr1:3006328-3016293	1	3006328	3016293	0	8	0	BLCA_hypo,BRCA_hypo,COAD_hypo,HNSC_hypo,LIHC_hypo,LUSC_hypo,PRAD_hypo,UCEC_hypo
chr1:3034235-3037712	1	3034235	3037712	0	7	0	BLCA_hypo,BRCA_hypo,HNSC_hypo,LIHC_hypo,LUSC_hypo,PRAD_hypo,UCEC_hypo
chr1:3057809-3070786	1	3057809	3070786	0	0	9	BLCA_hypoway,BRCA_hypoway,COAD_hypoway,ESCA_hypoway,HNSC_hypoway,LIHC_hypoway,LUSC_hypoway,PRAD_hypoway,UCEC_hypoway
chr1:3072234-3078206	1	3072234	3078206	0	5	0	BLCA_hypo,BRCA_hypo,HNSC_hypo,LIHC_hypo,UCEC_hypo
chr1:3120012-3129238	1	3120012	3129238	1	9	0	BLCA_hypo,BRCA_hypo,COAD_hypo,ESCA_hypo,HNSC_hypo,KIRP_hyper,LIHC_hypo,LUSC_hypo,PRAD_hypo,UCEC_hypo
chr1:3144112-3150935	1	3144112	3150935	0	9	0	BLCA_hypo,BRCA_hypo,COAD_hypo,ESCA_hypo,HNSC_hypo,LIHC_hypo,LUSC_hypo,PRAD_hypo,UCEC_hypo
chr1:3159082-3161448	1	3159082	3161448	0	6	0	BLCA_hypo,BRCA_hypo,LIHC_hypo,LUSC_hypo,PRAD_hypo,UCEC_hypo
chr1:3184433-3189088	1	3184433	3189088	0	5	0	BLCA_hypo,BRCA_hypo,LIHC_hypo,LUSC_hypo,UCEC_hypo
chr1:3193117-3196042	1	3193117	3196042	0	7	0	BLCA_hypo,BRCA_hypo,HNSC_hypo,LIHC_hypo,LUSC_hypo,PRAD_hypo,UCEC_hypo
chr1:3204077-3210424	1	3204077	3210424	0	10	0	BLCA_hypo,BRCA_hypo,COAD_hypo,ESCA_hypo,HNSC_hypo,LIHC_hypo,LUSC_hypo,PAAD_hypo,PRAD_hypo,UCEC_hypo
chr1:3241866-3251680	1	3241866	3251680	0	8	0	BLCA_hypo,BRCA_hypo,ESCA_hypo,HNSC_hypo,LIHC_hypo,LUSC_hypo,PAAD_hypo,UCEC_hypo
chr1:3272130-3275283	1	3272130	3275283	0	5	0	BLCA_hypo,HNSC_hypo,LIHC_hypo,LUSC_hypo,UCEC_hypo
chr1:3289797-3307070	1	3289797	3307070	0	0	11	BLCA_hypoway,BRCA_hypoway,COAD_hypoway,ESCA_hypoway,HNSC_hypoway,KIRC_hypoway,LIHC_hypoway,LUAD_hypoway,LUSC_hypoway,PRAD_hypoway,UCEC_hypoway
chr1:3328592-3331278	1	3328592	3331278	0	9	0	BLCA_hypo,BRCA_hypo,ESCA_hypo,HNSC_hypo,LIHC_hypo,LUAD_hypo,LUSC_hypo,PRAD_hypo,UCEC_hypo
chr1:3349981-3354467	1	3349981	3354467	0	11	0	BLCA_hypo,BRCA_hypo,COAD_hypo,ESCA_hypo,HNSC_hypo,KIRC_hypo,LIHC_hypo,LUSC_hypo,PAAD_hypo,PRAD_hypo,UCEC_hypo
chr1:3424353-3436037	1	3424353	3436037	0	0	5	BLCA_hypoway,HNSC_hypoway,LIHC_hypoway,LUAD_hypoway,LUSC_hypoway
chr1:3477689-3496101	1	3477689	3496101	0	0	8	BLCA_hypoway,COAD_hypoway,ESCA_hypoway,HNSC_hypoway,LIHC_hypoway,LUAD_hypoway,LUSC_hypoway,UCEC_hypoway
chr1:3508883-3512777	1	3508883	3512777	0	9	0	BLCA_hypo,BRCA_hypo,COAD_hypo,HNSC_hypo,LIHC_hypo,LUAD_hypo,LUSC_hypo,PRAD_hypo,UCEC_hypo
chr1:3567162-3567986	1	3567162	3567986	13	0	0	BLCA_hyper,BRCA_hyper,COAD_hyper,ESCA_hyper,HNSC_hyper,KIRC_hyper,KIRP_hyper,LIHC_hyper,LUAD_hyper,LUSC_hyper,PAAD_hyper,PRAD_hyper,UCEC_hyper
chr1:3606701-3607425	1	3606701	3607425	2	3	0	BLCA_hypo,BRCA_hyper,ESCA_hypo,LUSC_hypo,PRAD_hyper
chr1:3621047-3632713	1	3621047	3632713	3	0	0	BRCA_hyper,HNSC_hyper,PRAD_hyper
chr1:3648748-3649971	1	3648748	3649971	10	0	0	BLCA_hyper,BRCA_hyper,COAD_hyper,ESCA_hyper,HNSC_hyper,KIRC_hyper,KIRP_hyper,LUAD_hyper,LUSC_hyper,UCEC_hyper
chr1:3662684-3663832	1	3662684	3663832	9	0	0	BLCA_hyper,BRCA_hyper,COAD_hyper,ESCA_hyper,HNSC_hyper,KIRC_hyper,KIRP_hyper,LUSC_hyper,PAAD_hyper
chr1:3664585-3687108	1	3664585	3687108	0	0	5	BLCA_hypoway,COAD_hypoway,HNSC_hypoway,LIHC_hypoway,LUSC_hypoway
chr1:4119623-4192931	1	4119623	4192931	0	0	10	BLCA_hypoway,BRCA_hypoway,COAD_hypoway,ESCA_hypoway,HNSC_hypoway,LIHC_hypoway,LUAD_hypoway,LUSC_hypoway,PRAD_hypoway,UCEC_hypoway
chr1:4220527-4567204	1	4220527	4567204	0	0	10	BLCA_hypoway,BRCA_hypoway,COAD_hypoway,ESCA_hypoway,HNSC_hypoway,LIHC_hypoway,LUAD_hypoway,LUSC_hypoway,PRAD_hypoway,UCEC_hypoway
chr1:4714007-4716578	1	4714007	4716578	9	0	0	BLCA_hyper,BRCA_hyper,COAD_hyper,ESCA_hyper,HNSC_hyper,LUAD_hyper,LUSC_hyper,PAAD_hyper,UCEC_hyper
chr1:4722689-4736187	1	4722689	4736187	0	0	6	BLCA_hypoway,BRCA_hypoway,HNSC_hypoway,LUAD_hypoway,PRAD_hypoway,UCEC_hypoway
chr1:4844110-5334430	1	4844110	5334430	0	0	11	BLCA_hypoway,BRCA_hypoway,COAD_hypoway,ESCA_hypoway,HNSC_hypoway,LIHC_hypoway,LUAD_hypoway,LUSC_hypoway,PAAD_hypoway,PRAD_hypoway,UCEC_hypoway
chr1:5539957-5540950	1	5539957	5540950	0	8	0	BLCA_hypo,BRCA_hypo,HNSC_hypo,LIHC_hypo,LUAD_hypo,LUSC_hypo,PRAD_hypo,UCEC_hypo
chr1:5661802-5774259	1	5661802	5774259	0	0	8	BLCA_hypoway,BRCA_hypoway,COAD_hypoway,HNSC_hypoway,LIHC_hypoway,LUAD_hypoway,LUSC_hypoway,UCEC_hypoway
chr1:5790470-5812881	1	5790470	5812881	0	0	4	BLCA_hypoway,HNSC_hypoway,LIHC_hypoway,LUAD_hypoway
chr1:5937157-5937680	1	5937157	5937680	1	0	0	KIRP_hyper
chr1:6085994-6093972	1	6085994	6093972	0	6	0	BLCA_hypo,BRCA_hypo,HNSC_hypo,LIHC_hypo,LUSC_hypo,UCEC_hypo
chr1:6149048-6154558	1	6149048	6154558	0	5	0	BLCA_hypo,BRCA_hypo,HNSC_hypo,LUSC_hypo,UCEC_hypo
chr1:6159516-6185999	1	6159516	6185999	0	0	8	BLCA_hypoway,BRCA_hypoway,COAD_hypoway,HNSC_hypoway,LIHC_hypoway,LUAD_hypoway,LUSC_hypoway,UCEC_hypoway
chr1:6188725-6204000	1	6188725	6204000	0	0	7	BLCA_hypoway,BRCA_hypoway,HNSC_hypoway,LIHC_hypoway,LUAD_hypoway,LUSC_hypoway,UCEC_hypoway
chr1:6214771-6238616	1	6214771	6238616	0	0	6	BLCA_hypoway,HNSC_hypoway,LIHC_hypoway,LUAD_hypoway,LUSC_hypoway,UCEC_hypoway
chr1:6268789-6269635	1	6268789	6269635	6	0	0	BLCA_hyper,COAD_hyper,ESCA_hyper,HNSC_hyper,KIRP_hyper,LUSC_hyper
chr1:6304198-6304499	1	6304198	6304499	10	0	0	BLCA_hyper,BRCA_hyper,COAD_hyper,ESCA_hyper,HNSC_hyper,LUAD_hyper,LUSC_hyper,PAAD_hyper,PRAD_hyper,UCEC_hyper
chr1:6324896-6450174	1	6324896	6450174	1	0	1	KIRP_hyper,PAAD_hypoway
chr1:6507489-6508035	1	6507489	6508035	6	0	0	BRCA_hyper,COAD_hyper,KIRC_hyper,KIRP_hyper,LIHC_hyper,PRAD_hyper
chr1:6514604-6515748	1	6514604	6515748	8	0	0	BLCA_hyper,BRCA_hyper,COAD_hyper,ESCA_hyper,HNSC_hyper,LUAD_hyper,LUSC_hyper,UCEC_hyper
chr1:6526048-6526398	1	6526048	6526398	5	0	0	BLCA_hyper,COAD_hyper,LUAD_hyper,LUSC_hyper,UCEC_hyper
chr1:6530742-6534879	1	6530742	6534879	0	5	0	BLCA_hypo,LIHC_hypo,LUAD_hypo,LUSC_hypo,PAAD_hypo
chr1:6544510-6546839	1	6544510	6546839	2	1	0	HNSC_hyper,LUSC_hyper,UCEC_hypo
chr1:6657058-6659366	1	6657058	6659366	4	2	0	BRCA_hyper,HNSC_hyper,KIRC_hyper,LUAD_hypo,LUSC_hypo,PRAD_hyper
chr1:6663531-6664268	1	6663531	6664268	2	0	0	LUSC_hyper,PRAD_hyper
chr1:7081264-7123315	1	7081264	7123315	0	0	9	BLCA_hypoway,BRCA_hypoway,COAD_hypoway,ESCA_hypoway,HNSC_hypoway,LIHC_hypoway,LUAD_hypoway,LUSC_hypoway,UCEC_hypoway
chr1:7284225-7319248	1	7284225	7319248	0	0	5	BLCA_hypoway,HNSC_hypoway,LIHC_hypoway,LUSC_hypoway,UCEC_hypoway
chr1:7574874-7621849	1	7574874	7621849	0	0	6	BLCA_hypoway,HNSC_hypoway,LIHC_hypoway,LUAD_hypoway,LUSC_hypoway,UCEC_hypoway
chr1:7767715-7829296	1	7767715	7829296	0	0	6	BLCA_hypoway,HNSC_hypoway,LIHC_hypoway,LUAD_hypoway,LUSC_hypoway,UCEC_hypoway
chr1:8013973-8014650	1	8013973	8014650	1	0	0	UCEC_hyper
chr1:8271917-8275693	1	8271917	8275693	1	7	0	BLCA_hypo,ESCA_hypo,HNSC_hypo,LUAD_hypo,LUSC_hypo,PAAD_hypo,PRAD_hyper,UCEC_hypo
chr1:8384439-8393978	1	8384439	8393978	0	4	0	BLCA_hypo,HNSC_hypo,LIHC_hypo,LUSC_hypo
chr1:9004960-9006680	1	9004960	9006680	0	4	0	BLCA_hypo,LIHC_hypo,LUSC_hypo,UCEC_hypo
chr1:9713283-9730401	1	9713283	9730401	0	0	4	HNSC_hypoway,KIRC_hypoway,KIRP_hypoway,UCEC_hypoway
chr1:9750812-9844683	1	9750812	9844683	0	0	1	LIHC_hypoway
chr1:9884564-9884732	1	9884564	9884732	1	0	0	PRAD_hyper
chr1:10732062-10739980	1	10732062	10739980	7	1	0	BLCA_hyper,COAD_hyper,ESCA_hyper,KIRC_hyper,KIRP_hyper,LUAD_hyper,LUSC_hyper,PRAD_hypo
chr1:10757435-10764273	1	10757435	10764273	0	1	0	LUSC_hypo
chr1:10794228-10816499	1	10794228	10816499	1	0	2	ESCA_hyper,LIHC_hypoway,LUSC_hypoway
chr1:11361899-11534690	1	11361899	11534690	0	0	6	BLCA_hypoway,COAD_hypoway,LIHC_hypoway,LUAD_hypoway,LUSC_hypoway,UCEC_hypoway
chr1:11538720-11540200	1	11538720	11540200	2	0	0	LUAD_hyper,PAAD_hyper
chr1:11562924-11596950	1	11562924	11596950	0	0	7	BLCA_hypoway,COAD_hypoway,ESCA_hypoway,HNSC_hypoway,LIHC_hypoway,LUAD_hypoway,LUSC_hypoway
chr1:12123261-12124114	1	12123261	12124114	5	0	0	BRCA_hyper,COAD_hyper,LUAD_hyper,PAAD_hyper,PRAD_hyper
chr1:12248162-12261884	1	12248162	12261884	1	0	1	KIRP_hyper,LUSC_hypoway
chr1:12598004-12612165	1	12598004	12612165	5	0	2	BRCA_hyper,COAD_hypoway,ESCA_hyper,KIRC_hyper,KIRP_hyper,PAAD_hypoway,PRAD_hyper
chr1:12785786-13736832	1	12785786	13736832	0	0	11	BLCA_hypoway,BRCA_hypoway,COAD_hypoway,ESCA_hypoway,HNSC_hypoway,KIRC_hypoway,LIHC_hypoway,LUAD_hypoway,LUSC_hypoway,PRAD_hypoway,UCEC_hypoway
chr1:13839127-13840494	1	13839127	13840494	4	0	0	COAD_hyper,LUAD_hyper,PAAD_hyper,PRAD_hyper
chr1:13910137-13910796	1	13910137	13910796	5	0	0	BRCA_hyper,COAD_hyper,LUAD_hyper,PAAD_hyper,PRAD_hyper
chr1:14026481-14027167	1	14026481	14027167	1	0	0	LIHC_hyper
chr1:14027520-14057606	1	14027520	14057606	0	0	1	LIHC_hypoway
chr1:14355056-14917857	1	14355056	14917857	2	0	8	BLCA_hypoway,COAD_hypoway,ESCA_hypoway,KIRC_hypoway,KIRP_hyper,LIHC_hypoway,LUAD_hypoway,LUSC_hypoway,PRAD_hyper,UCEC_hypoway
chr1:14927850-15249874	1	14927850	15249874	1	0	6	BLCA_hypoway,COAD_hypoway,HNSC_hypoway,KIRP_hyper,LIHC_hypoway,LUAD_hypoway,UCEC_hypoway
chr1:15271829-15272326	1	15271829	15272326	3	1	0	COAD_hyper,HNSC_hyper,LUSC_hyper,PAAD_hypo
chr1:15540151-15541446	1	15540151	15541446	4	1	0	BRCA_hyper,KIRC_hyper,KIRP_hyper,PAAD_hypo,UCEC_hyper
chr1:15783157-15802611	1	15783157	15802611	3	0	1	BLCA_hyper,HNSC_hypoway,PAAD_hyper,UCEC_hyper
chr1:16084444-16087752	1	16084444	16087752	4	0	0	COAD_hyper,KIRC_hyper,KIRP_hyper,PRAD_hyper
chr1:16465561-16473479	1	16465561	16473479	2	0	0	LUSC_hyper,PRAD_hyper
chr1:16553266-16554558	1	16553266	16554558	11	0	0	BLCA_hyper,BRCA_hyper,COAD_hyper,ESCA_hyper,HNSC_hyper,KIRC_hyper,KIRP_hyper,LUAD_hyper,LUSC_hyper,PRAD_hyper,UCEC_hyper
chr1:16846937-16863485	1	16846937	16863485	7	0	0	BRCA_hyper,COAD_hyper,HNSC_hyper,KIRP_hyper,LUAD_hyper,LUSC_hyper,UCEC_hyper
chr1:17019132-17020878	1	17019132	17020878	8	0	0	BLCA_hyper,BRCA_hyper,COAD_hyper,ESCA_hyper,HNSC_hyper,LUAD_hyper,LUSC_hyper,UCEC_hyper
chr1:17046419-17051392	1	17046419	17051392	1	4	0	BLCA_hypo,HNSC_hypo,KIRP_hyper,LIHC_hypo,LUSC_hypo
chr1:17085859-17086558	1	17085859	17086558	10	0	0	BLCA_hyper,BRCA_hyper,COAD_hyper,HNSC_hyper,KIRC_hyper,KIRP_hyper,LUAD_hyper,LUSC_hyper,PRAD_hyper,UCEC_hyper
chr1:17197455-17201791	1	17197455	17201791	9	0	0	BLCA_hyper,BRCA_hyper,COAD_hyper,HNSC_hyper,KIRP_hyper,LUAD_hyper,LUSC_hyper,PRAD_hyper,UCEC_hyper
chr1:17574329-17662685	1	17574329	17662685	0	0	7	BLCA_hypoway,COAD_hypoway,KIRC_hypoway,LIHC_hypoway,LUAD_hypoway,PAAD_hypoway,UCEC_hypoway
chr1:17846707-17848742	1	17846707	17848742	0	4	0	BLCA_hypo,BRCA_hypo,KIRP_hypo,UCEC_hypo
chr1:18060275-18214635	1	18060275	18214635	0	0	5	BLCA_hypoway,COAD_hypoway,HNSC_hypoway,LIHC_hypoway,UCEC_hypoway
chr1:18434105-18437431	1	18434105	18437431	6	0	0	COAD_hyper,HNSC_hyper,LUAD_hyper,LUSC_hyper,PAAD_hyper,UCEC_hyper
chr1:18686649-18693462	1	18686649	18693462	0	5	0	COAD_hypo,ESCA_hypo,HNSC_hypo,LIHC_hypo,LUSC_hypo
chr1:18700890-18807594	1	18700890	18807594	0	0	7	BLCA_hypoway,COAD_hypoway,HNSC_hypoway,LIHC_hypoway,LUAD_hypoway,LUSC_hypoway,UCEC_hypoway
chr1:18956761-18959625	1	18956761	18959625	10	0	0	BLCA_hyper,BRCA_hyper,COAD_hyper,ESCA_hyper,HNSC_hyper,LUAD_hyper,LUSC_hyper,PAAD_hyper,PRAD_hyper,UCEC_hyper
chr1:18963193-18965091	1	18963193	18965091	7	0	0	BRCA_hyper,ESCA_hyper,HNSC_hyper,LUAD_hyper,LUSC_hyper,PAAD_hyper,UCEC_hyper
chr1:18967999-18972096	1	18967999	18972096	5	0	0	BRCA_hyper,HNSC_hyper,LUAD_hyper,LUSC_hyper,PRAD_hyper
chr1:19166512-19187237	1	19166512	19187237	0	0	7	BLCA_hypoway,ESCA_hypoway,HNSC_hypoway,LIHC_hypoway,LUAD_hypoway,LUSC_hypoway,UCEC_hypoway
chr1:19600453-19601069	1	19600453	19601069	5	0	0	HNSC_hyper,LUAD_hyper,LUSC_hyper,PRAD_hyper,UCEC_hyper
chr1:19614850-19615702	1	19614850	19615702	4	0	0	HNSC_hyper,LUAD_hyper,LUSC_hyper,PRAD_hyper
chr1:19640711-19664276	1	19640711	19664276	0	0	1	LUSC_hypoway
chr1:19727556-19752812	1	19727556	19752812	2	0	0	HNSC_hyper,UCEC_hyper
chr1:19764479-19794335	1	19764479	19794335	7	0	0	BLCA_hyper,BRCA_hyper,HNSC_hyper,KIRC_hyper,KIRP_hyper,LUSC_hyper,UCEC_hyper
chr1:19996239-20123989	1	19996239	20123989	0	0	5	BLCA_hypoway,HNSC_hypoway,LIHC_hypoway,LUSC_hypoway,UCEC_hypoway
chr1:20417752-20492604	1	20417752	20492604	0	0	5	BLCA_hypoway,HNSC_hypoway,LIHC_hypoway,LUAD_hypoway,LUSC_hypoway
chr1:20669723-20693333	1	20669723	20693333	11	0	0	BLCA_hyper,BRCA_hyper,COAD_hyper,ESCA_hyper,HNSC_hyper,LIHC_hyper,LUAD_hyper,LUSC_hyper,PAAD_hyper,PRAD_hyper,UCEC_hyper
chr1:20878539-20880663	1	20878539	20880663	9	0	0	BLCA_hyper,BRCA_hyper,COAD_hyper,ESCA_hyper,HNSC_hyper,LUAD_hyper,LUSC_hyper,PAAD_hyper,PRAD_hyper
chr1:21900986-21913557	1	21900986	21913557	1	0	2	BRCA_hyper,LUSC_hypoway,PAAD_hypoway
chr1:22149683-22211623	1	22149683	22211623	0	0	1	LIHC_hypoway
chr1:22222814-22238906	1	22222814	22238906	8	0	1	BRCA_hyper,ESCA_hyper,HNSC_hyper,KIRC_hyper,KIRP_hyper,LUAD_hyper,LUSC_hyper,PAAD_hypoway,PRAD_hyper
chr1:22303325-22328339	1	22303325	22328339	1	0	0	PAAD_hyper
chr1:22351388-22352348	1	22351388	22352348	0	1	0	PAAD_hypo
chr1:22915625-22966051	1	22915625	22966051	0	0	8	BLCA_hypoway,COAD_hypoway,ESCA_hypoway,HNSC_hypoway,LIHC_hypoway,LUAD_hypoway,LUSC_hypoway,UCEC_hypoway
chr1:22969339-22987905	1	22969339	22987905	0	0	9	BLCA_hypoway,COAD_hypoway,ESCA_hypoway,HNSC_hypoway,KIRC_hypoway,LIHC_hypoway,LUAD_hypoway,LUSC_hypoway,UCEC_hypoway
chr1:23109880-23122112	1	23109880	23122112	0	0	1	LIHC_hypoway
chr1:23518538-23522665	1	23518538	23522665	0	3	0	BLCA_hypo,LIHC_hypo,LUSC_hypo
chr1:24231352-24283657	1	24231352	24283657	0	0	9	BLCA_hypoway,BRCA_hypoway,HNSC_hypoway,KIRP_hypoway,LIHC_hypoway,LUAD_hypoway,LUSC_hypoway,PRAD_hypoway,UCEC_hypoway
chr1:25257504-25258236	1	25257504	25258236	13	0	0	BLCA_hyper,BRCA_hyper,COAD_hyper,ESCA_hyper,HNSC_hyper,KIRC_hyper,KIRP_hyper,LIHC_hyper,LUAD_hyper,LUSC_hyper,PAAD_hyper,PRAD_hyper,UCEC_hyper
chr1:25346258-25549257	1	25346258	25549257	0	0	7	BLCA_hypoway,COAD_hypoway,HNSC_hypoway,KIRC_hypoway,LIHC_hypoway,LUAD_hypoway,LUSC_hypoway
chr1:26503846-26504019	1	26503846	26504019	3	3	0	BLCA_hypo,KIRC_hyper,KIRP_hyper,LIHC_hyper,LUSC_hypo,UCEC_hypo
chr1:26511620-26519331	1	26511620	26519331	0	2	0	LIHC_hypo,LUSC_hypo
chr1:26737115-26738039	1	26737115	26738039	7	0	0	BRCA_hyper,COAD_hyper,HNSC_hyper,LUAD_hyper,LUSC_hyper,PAAD_hyper,PRAD_hyper
chr1:27113218-27113753	1	27113218	27113753	6	0	0	COAD_hyper,ESCA_hyper,LIHC_hyper,LUSC_hyper,PRAD_hyper,UCEC_hyper
chr1:27189269-27189679	1	27189269	27189679	0	9	0	BLCA_hypo,BRCA_hypo,KIRC_hypo,KIRP_hypo,LIHC_hypo,LUAD_hypo,LUSC_hypo,PAAD_hypo,UCEC_hypo
chr1:27238471-27240694	1	27238471	27240694	3	0	0	KIRC_hyper,KIRP_hyper,LUSC_hyper
chr1:27503351-27559823	1	27503351	27559823	0	0	5	BLCA_hypoway,HNSC_hypoway,LIHC_hypoway,LUSC_hypoway,PRAD_hypoway
chr1:27683138-27683912	1	27683138	27683912	2	1	0	ESCA_hyper,HNSC_hyper,PAAD_hypo
chr1:27729052-27732226	1	27729052	27732226	6	0	0	BLCA_hyper,BRCA_hyper,HNSC_hyper,KIRP_hyper,PRAD_hyper,UCEC_hyper
chr1:27846842-27853797	1	27846842	27853797	0	2	0	LUSC_hypo,PAAD_hypo
chr1:27889260-27902687	1	27889260	27902687	8	0	0	BLCA_hyper,BRCA_hyper,ESCA_hyper,HNSC_hyper,KIRC_hyper,LIHC_hyper,LUSC_hyper,PRAD_hyper
chr1:27961562-27962037	1	27961562	27962037	3	1	0	KIRP_hyper,LUAD_hyper,LUSC_hyper,PAAD_hypo
chr1:29445460-29452103	1	29445460	29452103	2	0	0	COAD_hyper,PRAD_hyper
chr1:29585852-29610375	1	29585852	29610375	2	0	0	BLCA_hyper,LUAD_hyper
chr1:29824434-31155158	1	29824434	31155158	0	0	9	BLCA_hypoway,COAD_hypoway,HNSC_hypoway,KIRC_hypoway,LIHC_hypoway,LUAD_hypoway,LUSC_hypoway,PRAD_hypoway,UCEC_hypoway
chr1:31314607-31368797	1	31314607	31368797	0	0	4	BLCA_hypoway,HNSC_hypoway,LUAD_hypoway,LUSC_hypoway
chr1:31423022-31504704	1	31423022	31504704	2	0	2	HNSC_hyper,LUSC_hypoway,PRAD_hyper,UCEC_hypoway
chr1:31845922-31846873	1	31845922	31846873	2	1	0	BRCA_hyper,PAAD_hypo,PRAD_hyper
chr1:32041051-32042921	1	32041051	32042921	1	3	0	BLCA_hypo,PAAD_hypo,PRAD_hyper,UCEC_hypo
chr1:32183341-32219777	1	32183341	32219777	0	0	2	LIHC_hypoway,UCEC_hypoway
chr1:32410210-32452930	1	32410210	32452930	4	0	0	BRCA_hyper,LIHC_hyper,LUSC_hyper,PRAD_hyper
chr1:32707132-32713275	1	32707132	32713275	5	0	0	BRCA_hyper,KIRC_hyper,KIRP_hyper,LUSC_hyper,PRAD_hyper
chr1:32930167-32931323	1	32930167	32931323	3	0	0	COAD_hyper,PAAD_hyper,PRAD_hyper
chr1:33216949-33220274	1	33216949	33220274	2	0	0	COAD_hyper,LIHC_hyper
chr1:33231069-33231313	1	33231069	33231313	6	0	0	BLCA_hyper,COAD_hyper,ESCA_hyper,KIRC_hyper,KIRP_hyper,UCEC_hyper
chr1:33772146-33813745	1	33772146	33813745	8	0	0	BRCA_hyper,ESCA_hyper,HNSC_hyper,KIRP_hyper,LIHC_hyper,LUSC_hyper,PRAD_hyper,UCEC_hyper
chr1:33937967-33938904	1	33937967	33938904	1	0	0	PRAD_hyper
chr1:34014213-34333326	1	34014213	34333326	0	0	11	BLCA_hypoway,BRCA_hypoway,COAD_hypoway,ESCA_hypoway,HNSC_hypoway,KIRC_hypoway,LIHC_hypoway,LUAD_hypoway,LUSC_hypoway,PAAD_hypoway,UCEC_hypoway
chr1:34631323-34632588	1	34631323	34632588	8	0	0	BRCA_hyper,COAD_hyper,HNSC_hyper,LUAD_hyper,LUSC_hyper,PAAD_hyper,PRAD_hyper,UCEC_hyper
chr1:35333885-35347799	1	35333885	35347799	0	0	2	LIHC_hypoway,LUSC_hypoway
chr1:35350812-35351903	1	35350812	35351903	5	2	0	BRCA_hyper,COAD_hyper,KIRC_hypo,KIRP_hypo,LUAD_hyper,LUSC_hyper,PRAD_hyper
chr1:36042985-36043633	1	36042985	36043633	9	0	0	BLCA_hyper,BRCA_hyper,COAD_hyper,ESCA_hyper,HNSC_hyper,LUAD_hyper,LUSC_hyper,PRAD_hyper,UCEC_hyper
chr1:36786284-36787932	1	36786284	36787932	7	0	0	COAD_hyper,ESCA_hyper,HNSC_hyper,KIRC_hyper,KIRP_hyper,LIHC_hyper,PRAD_hyper
chr1:37113073-37231474	1	37113073	37231474	0	0	5	BLCA_hypoway,COAD_hypoway,LIHC_hypoway,LUSC_hypoway,UCEC_hypoway
chr1:37498269-37499649	1	37498269	37499649	9	0	0	BLCA_hyper,COAD_hyper,ESCA_hyper,HNSC_hyper,LUAD_hyper,LUSC_hyper,PAAD_hyper,PRAD_hyper,UCEC_hyper
chr1:37507292-37937945	1	37507292	37937945	0	0	7	BLCA_hypoway,COAD_hypoway,HNSC_hypoway,LIHC_hypoway,LUAD_hypoway,LUSC_hypoway,UCEC_hypoway
chr1:38099873-38100837	1	38099873	38100837	5	0	0	COAD_hyper,ESCA_hyper,HNSC_hyper,LUAD_hyper,PAAD_hyper
chr1:38230768-38230887	1	38230768	38230887	8	0	0	BRCA_hyper,COAD_hyper,HNSC_hyper,LUAD_hyper,LUSC_hyper,PAAD_hyper,PRAD_hyper,UCEC_hyper
chr1:38412518-38412818	1	38412518	38412818	7	0	0	BRCA_hyper,COAD_hyper,ESCA_hyper,LUAD_hyper,LUSC_hyper,PRAD_hyper,UCEC_hyper
chr1:38802859-38930900	1	38802859	38930900	0	0	8	BLCA_hypoway,COAD_hypoway,HNSC_hypoway,LIHC_hypoway,LUAD_hypoway,LUSC_hypoway,PRAD_hypoway,UCEC_hypoway
chr1:39024824-39036030	1	39024824	39036030	1	0	0	PRAD_hyper
chr1:39174409-39212920	1	39174409	39212920	0	0	5	BLCA_hypoway,HNSC_hypoway,LIHC_hypoway,LUAD_hypoway,LUSC_hypoway
chr1:40137088-40138052	1	40137088	40138052	3	0	0	COAD_hyper,LUSC_hyper,PRAD_hyper
chr1:40225744-40251192	1	40225744	40251192	1	0	0	KIRP_hyper
chr1:40598393-40599011	1	40598393	40599011	9	0	0	BLCA_hyper,BRCA_hyper,ESCA_hyper,HNSC_hyper,LUAD_hyper,LUSC_hyper,PAAD_hyper,PRAD_hyper,UCEC_hyper
chr1:40780092-40783264	1	40780092	40783264	2	0	0	BRCA_hyper,PRAD_hyper
chr1:41119274-41119988	1	41119274	41119988	6	0	0	BLCA_hyper,BRCA_hyper,KIRC_hyper,KIRP_hyper,LUAD_hyper,PRAD_hyper
chr1:41283772-41304435	1	41283772	41304435	7	0	0	BLCA_hyper,BRCA_hyper,KIRC_hyper,KIRP_hyper,LUAD_hyper,PRAD_hyper,UCEC_hyper
chr1:41832031-41851836	1	41832031	41851836	3	0	0	BLCA_hyper,COAD_hyper,PRAD_hyper
chr1:42237912-42334284	1	42237912	42334284	0	0	7	BLCA_hypoway,COAD_hypoway,HNSC_hypoway,LIHC_hypoway,LUAD_hypoway,LUSC_hypoway,UCEC_hypoway
chr1:42503578-42506979	1	42503578	42506979	0	4	0	BLCA_hypo,HNSC_hypo,LIHC_hypo,LUSC_hypo
chr1:42618040-42628449	1	42618040	42628449	0	0	4	BLCA_hypoway,HNSC_hypoway,LUAD_hypoway,LUSC_hypoway
chr1:43204162-43207143	1	43204162	43207143	4	0	0	BRCA_hyper,KIRC_hyper,KIRP_hyper,LUAD_hyper
chr1:43250690-43281794	1	43250690	43281794	9	0	0	BLCA_hyper,BRCA_hyper,COAD_hyper,ESCA_hyper,HNSC_hyper,LIHC_hyper,LUAD_hyper,LUSC_hyper,PRAD_hyper
chr1:43351859-43357107	1	43351859	43357107	0	3	0	HNSC_hypo,LIHC_hypo,LUSC_hypo
chr1:43396870-43423072	1	43396870	43423072	2	0	8	BLCA_hypoway,BRCA_hypoway,COAD_hypoway,KIRC_hypoway,KIRP_hyper,LUAD_hypoway,LUSC_hypoway,PAAD_hypoway,PRAD_hyper,UCEC_hypoway
chr1:43472971-43524347	1	43472971	43524347	2	0	1	BRCA_hyper,LUSC_hypoway,PRAD_hyper
chr1:43533795-43535050	1	43533795	43535050	2	0	0	LUSC_hyper,PRAD_hyper
chr1:43613172-43613627	1	43613172	43613627	4	0	0	COAD_hyper,HNSC_hyper,LUAD_hyper,LUSC_hyper
chr1:43750639-43751563	1	43750639	43751563	0	5	0	BLCA_hypo,BRCA_hypo,LUAD_hypo,LUSC_hypo,UCEC_hypo
chr1:44024149-44031826	1	44024149	44031826	12	0	0	BLCA_hyper,BRCA_hyper,COAD_hyper,ESCA_hyper,HNSC_hyper,KIRC_hyper,KIRP_hyper,LUAD_hyper,LUSC_hyper,PAAD_hyper,PRAD_hyper,UCEC_hyper
chr1:44401759-44402522	1	44401759	44402522	1	0	0	HNSC_hyper
chr1:44584110-44584930	1	44584110	44584930	0	4	0	BLCA_hypo,COAD_hypo,HNSC_hypo,LUSC_hypo
chr1:44873056-44874649	1	44873056	44874649	10	0	0	BLCA_hyper,BRCA_hyper,COAD_hyper,ESCA_hyper,HNSC_hyper,LUAD_hyper,LUSC_hyper,PAAD_hyper,PRAD_hyper,UCEC_hyper
chr1:45082703-45083278	1	45082703	45083278	4	0	0	HNSC_hyper,KIRC_hyper,KIRP_hyper,LUAD_hyper
chr1:45249874-45252291	1	45249874	45252291	4	0	0	BRCA_hyper,COAD_hyper,LUSC_hyper,PRAD_hyper
chr1:45792539-45793300	1	45792539	45793300	1	0	0	PRAD_hyper
chr1:46088335-46090169	1	46088335	46090169	9	1	0	BLCA_hyper,BRCA_hyper,COAD_hyper,HNSC_hyper,KIRC_hyper,KIRP_hyper,LUAD_hyper,PAAD_hypo,PRAD_hyper,UCEC_hyper
chr1:46632464-46633153	1	46632464	46633153	4	0	0	BLCA_hyper,LIHC_hyper,LUSC_hyper,PRAD_hyper
chr1:46668821-46669345	1	46668821	46669345	1	0	0	LUAD_hyper
chr1:46951290-46952054	1	46951290	46952054	9	0	0	BLCA_hyper,BRCA_hyper,COAD_hyper,ESCA_hyper,HNSC_hyper,LUAD_hyper,LUSC_hyper,PAAD_hyper,PRAD_hyper
chr1:46956838-46959349	1	46956838	46959349	10	0	0	BLCA_hyper,BRCA_hyper,COAD_hyper,ESCA_hyper,LIHC_hyper,LUAD_hyper,LUSC_hyper,PAAD_hyper,PRAD_hyper,UCEC_hyper
chr1:47009526-47015494	1	47009526	47015494	7	0	0	BRCA_hyper,COAD_hyper,ESCA_hyper,HNSC_hyper,LUSC_hyper,PRAD_hyper,UCEC_hyper
chr1:47279984-47488256	1	47279984	47488256	0	0	6	BLCA_hypoway,ESCA_hypoway,HNSC_hypoway,KIRC_hypoway,LIHC_hypoway,LUSC_hypoway
chr1:47489194-47489776	1	47489194	47489776	1	0	0	LIHC_hyper
chr1:47694918-47696788	1	47694918	47696788	10	0	0	BLCA_hyper,BRCA_hyper,COAD_hyper,ESCA_hyper,HNSC_hyper,KIRP_hyper,LIHC_hyper,LUAD_hyper,LUSC_hyper,PRAD_hyper
chr1:47897575-47900320	1	47897575	47900320	12	0	0	BLCA_hyper,BRCA_hyper,COAD_hyper,ESCA_hyper,HNSC_hyper,KIRC_hyper,KIRP_hyper,LIHC_hyper,LUAD_hyper,LUSC_hyper,PAAD_hyper,UCEC_hyper
chr1:47909233-47911449	1	47909233	47911449	11	0	0	BLCA_hyper,BRCA_hyper,COAD_hyper,ESCA_hyper,HNSC_hyper,LIHC_hyper,LUAD_hyper,LUSC_hyper,PAAD_hyper,PRAD_hyper,UCEC_hyper
chr1:47998636-47999856	1	47998636	47999856	4	0	0	BRCA_hyper,LIHC_hyper,LUAD_hyper,PRAD_hyper
chr1:48459235-48460892	1	48459235	48460892	0	4	0	BLCA_hypo,HNSC_hypo,LUSC_hypo,UCEC_hypo
chr1:48470600-48764354	1	48470600	48764354	1	0	8	BLCA_hypoway,BRCA_hypoway,ESCA_hypoway,HNSC_hypoway,KIRP_hyper,LIHC_hypoway,LUAD_hypoway,LUSC_hypoway,UCEC_hypoway
chr1:48960136-49240625	1	48960136	49240625	0	0	9	BLCA_hypoway,COAD_hypoway,ESCA_hypoway,HNSC_hypoway,LIHC_hypoway,LUAD_hypoway,LUSC_hypoway,PAAD_hypoway,UCEC_hypoway
chr1:49242358-49243472	1	49242358	49243472	1	0	0	COAD_hyper
chr1:49244848-49511332	1	49244848	49511332	0	0	3	HNSC_hypoway,LIHC_hypoway,UCEC_hypoway
chr1:50489239-50489954	1	50489239	50489954	3	0	0	HNSC_hyper,LUAD_hyper,PAAD_hyper
chr1:50513644-50514460	1	50513644	50514460	8	0	0	BLCA_hyper,COAD_hyper,ESCA_hyper,HNSC_hyper,LUAD_hyper,LUSC_hyper,PAAD_hyper,UCEC_hyper
chr1:50568846-50629523	1	50568846	50629523	1	0	7	BLCA_hypoway,COAD_hypoway,ESCA_hypoway,HNSC_hypoway,KIRP_hyper,LIHC_hypoway,LUSC_hypoway,UCEC_hypoway
chr1:51887612-51910707	1	51887612	51910707	4	0	0	BLCA_hyper,KIRC_hyper,KIRP_hyper,UCEC_hyper
chr1:53067636-53068587	1	53067636	53068587	3	0	0	BRCA_hyper,COAD_hyper,PRAD_hyper
chr1:53098298-53099352	1	53098298	53099352	2	0	0	COAD_hyper,PAAD_hyper
chr1:53308596-53309261	1	53308596	53309261	3	0	0	COAD_hyper,HNSC_hyper,PRAD_hyper
chr1:53527411-53528612	1	53527411	53528612	6	0	0	BRCA_hyper,COAD_hyper,LUAD_hyper,LUSC_hyper,PAAD_hyper,PRAD_hyper
chr1:53541669-53581841	1	53541669	53581841	0	0	5	BLCA_hypoway,BRCA_hypoway,HNSC_hypoway,LIHC_hypoway,LUSC_hypoway
chr1:53828494-53926227	1	53828494	53926227	0	0	4	BLCA_hypoway,HNSC_hypoway,LIHC_hypoway,LUSC_hypoway
chr1:54199695-54200587	1	54199695	54200587	0	6	0	BLCA_hypo,HNSC_hypo,LIHC_hypo,LUAD_hypo,LUSC_hypo,PAAD_hypo
chr1:54821852-54825291	1	54821852	54825291	4	0	0	BLCA_hyper,KIRC_hyper,KIRP_hyper,LUSC_hyper
chr1:54844423-54856511	1	54844423	54856511	2	0	0	BRCA_hyper,PRAD_hyper
chr1:55246866-55248099	1	55246866	55248099	11	0	0	BLCA_hyper,BRCA_hyper,COAD_hyper,ESCA_hyper,HNSC_hyper,KIRC_hyper,KIRP_hyper,LUAD_hyper,LUSC_hyper,PRAD_hyper,UCEC_hyper
chr1:55464083-55480837	1	55464083	55480837	2	0	5	BLCA_hypoway,COAD_hypoway,HNSC_hypoway,KIRC_hyper,KIRP_hyper,LIHC_hypoway,LUSC_hypoway
chr1:56585053-56756750	1	56585053	56756750	0	0	10	BLCA_hypoway,BRCA_hypoway,COAD_hypoway,HNSC_hypoway,LIHC_hypoway,LUAD_hypoway,LUSC_hypoway,PAAD_hypoway,PRAD_hypoway,UCEC_hypoway
chr1:57383751-57570305	1	57383751	57570305	0	0	7	BLCA_hypoway,COAD_hypoway,ESCA_hypoway,HNSC_hypoway,LUAD_hypoway,LUSC_hypoway,PAAD_hypoway
chr1:57887654-57890610	1	57887654	57890610	5	0	0	BRCA_hyper,COAD_hyper,HNSC_hyper,LUAD_hyper,PAAD_hyper
chr1:58715498-58716377	1	58715498	58716377	6	0	0	BRCA_hyper,COAD_hyper,HNSC_hyper,LUAD_hyper,PAAD_hyper,PRAD_hyper
chr1:59042930-59043280	1	59042930	59043280	0	2	0	BLCA_hypo,UCEC_hypo
chr1:60280087-60281077	1	60280087	60281077	0	2	0	BLCA_hypo,UCEC_hypo
chr1:60539361-60539675	1	60539361	60539675	5	0	0	BLCA_hyper,LUAD_hyper,LUSC_hyper,PAAD_hyper,PRAD_hyper
chr1:61327586-61408076	1	61327586	61408076	0	0	7	BLCA_hypoway,BRCA_hypoway,HNSC_hypoway,KIRC_hypoway,LIHC_hypoway,LUSC_hypoway,UCEC_hypoway
chr1:61519472-61520099	1	61519472	61520099	2	0	0	LUSC_hyper,PRAD_hyper
chr1:62660187-62660861	1	62660187	62660861	11	0	0	BLCA_hyper,BRCA_hyper,ESCA_hyper,HNSC_hyper,KIRC_hyper,KIRP_hyper,LIHC_hyper,LUAD_hyper,LUSC_hyper,PRAD_hyper,UCEC_hyper
chr1:62664359-62781737	1	62664359	62781737	1	0	5	BLCA_hypoway,COAD_hypoway,HNSC_hypoway,LIHC_hypoway,LUSC_hypoway,UCEC_hyper
chr1:62784268-62785079	1	62784268	62785079	5	0	0	HNSC_hyper,LUAD_hyper,LUSC_hyper,PAAD_hyper,PRAD_hyper
chr1:63783976-63787170	1	63783976	63787170	12	0	0	BLCA_hyper,BRCA_hyper,COAD_hyper,ESCA_hyper,HNSC_hyper,KIRC_hyper,KIRP_hyper,LUAD_hyper,LUSC_hyper,PAAD_hyper,PRAD_hyper,UCEC_hyper
chr1:63795434-63796263	1	63795434	63796263	10	0	0	BLCA_hyper,BRCA_hyper,COAD_hyper,ESCA_hyper,HNSC_hyper,LUAD_hyper,LUSC_hyper,PAAD_hyper,PRAD_hyper,UCEC_hyper
chr1:64323321-64425375	1	64323321	64425375	1	0	6	BLCA_hypoway,BRCA_hypoway,COAD_hypoway,LIHC_hypoway,LUSC_hypoway,PRAD_hyper,UCEC_hypoway
chr1:64541264-64669125	1	64541264	64669125	0	0	7	BLCA_hypoway,BRCA_hypoway,COAD_hypoway,ESCA_hypoway,HNSC_hypoway,LIHC_hypoway,LUSC_hypoway
chr1:65036755-65210420	1	65036755	65210420	1	0	3	BLCA_hypoway,HNSC_hypoway,KIRP_hyper,LIHC_hypoway
chr1:65467979-65468921	1	65467979	65468921	1	1	0	COAD_hypo,PRAD_hyper
chr1:65731106-65731886	1	65731106	65731886	9	0	0	BLCA_hyper,BRCA_hyper,COAD_hyper,ESCA_hyper,HNSC_hyper,LUAD_hyper,LUSC_hyper,PAAD_hyper,PRAD_hyper
chr1:65889854-65988782	1	65889854	65988782	1	0	3	COAD_hypoway,HNSC_hypoway,KIRP_hyper,LUSC_hypoway
chr1:65991175-65993149	1	65991175	65993149	5	0	0	BLCA_hyper,COAD_hyper,ESCA_hyper,HNSC_hyper,LUAD_hyper
chr1:66257821-66259084	1	66257821	66259084	10	0	0	BLCA_hyper,BRCA_hyper,COAD_hyper,ESCA_hyper,HNSC_hyper,LUAD_hyper,LUSC_hyper,PAAD_hyper,PRAD_hyper,UCEC_hyper
chr1:66999058-66999929	1	66999058	66999929	7	0	0	BRCA_hyper,ESCA_hyper,HNSC_hyper,LUAD_hyper,LUSC_hyper,PRAD_hyper,UCEC_hyper
chr1:67217768-67217984	1	67217768	67217984	12	0	0	BLCA_hyper,BRCA_hyper,COAD_hyper,HNSC_hyper,KIRC_hyper,KIRP_hyper,LIHC_hyper,LUAD_hyper,LUSC_hyper,PAAD_hyper,PRAD_hyper,UCEC_hyper
chr1:67220431-67268315	1	67220431	67268315	0	0	3	HNSC_hypoway,LIHC_hypoway,LUSC_hypoway
chr1:67773072-67773725	1	67773072	67773725	4	0	0	LIHC_hyper,LUAD_hyper,PAAD_hyper,PRAD_hyper
chr1:68594185-68679600	1	68594185	68679600	0	0	1	LIHC_hypoway
chr1:70034474-70036106	1	70034474	70036106	8	0	0	BRCA_hyper,COAD_hyper,HNSC_hyper,KIRP_hyper,LUAD_hyper,LUSC_hyper,PAAD_hyper,PRAD_hyper
chr1:70225862-70509936	1	70225862	70509936	0	0	6	BLCA_hypoway,COAD_hypoway,HNSC_hypoway,LIHC_hypoway,LUAD_hypoway,LUSC_hypoway
chr1:71052147-71510804	1	71052147	71510804	0	0	5	BLCA_hypoway,COAD_hypoway,ESCA_hypoway,LIHC_hypoway,UCEC_hypoway
chr1:71632243-72382835	1	71632243	72382835	0	0	6	BLCA_hypoway,COAD_hypoway,ESCA_hypoway,HNSC_hypoway,LIHC_hypoway,LUSC_hypoway
chr1:72749014-72750241	1	72749014	72750241	1	0	0	PRAD_hyper
chr1:72884989-73463170	1	72884989	73463170	0	0	9	BLCA_hypoway,COAD_hypoway,ESCA_hypoway,HNSC_hypoway,LIHC_hypoway,LUAD_hypoway,LUSC_hypoway,PRAD_hypoway,UCEC_hypoway
chr1:74933556-75043066	1	74933556	75043066	0	0	5	BLCA_hypoway,HNSC_hypoway,LIHC_hypoway,LUSC_hypoway,UCEC_hypoway
chr1:75138963-75139581	1	75138963	75139581	5	0	0	COAD_hyper,HNSC_hyper,LUAD_hyper,PAAD_hyper,PRAD_hyper
chr1:75595918-75598280	1	75595918	75598280	11	0	0	BLCA_hyper,BRCA_hyper,COAD_hyper,ESCA_hyper,HNSC_hyper,KIRC_hyper,KIRP_hyper,LUAD_hyper,LUSC_hyper,PAAD_hyper,UCEC_hyper
chr1:75602166-75602925	1	75602166	75602925	12	0	0	BLCA_hyper,BRCA_hyper,COAD_hyper,ESCA_hyper,HNSC_hyper,KIRC_hyper,KIRP_hyper,LUAD_hyper,LUSC_hyper,PAAD_hyper,PRAD_hyper,UCEC_hyper
chr1:76081961-76082888	1	76081961	76082888	5	0	0	BRCA_hyper,COAD_hyper,HNSC_hyper,LUSC_hyper,PRAD_hyper
chr1:76540109-76540641	1	76540109	76540641	4	0	0	BRCA_hyper,HNSC_hyper,LUAD_hyper,PRAD_hyper
chr1:76547233-77096137	1	76547233	77096137	0	0	10	BLCA_hypoway,BRCA_hypoway,COAD_hypoway,ESCA_hypoway,HNSC_hypoway,KIRC_hypoway,LIHC_hypoway,LUAD_hypoway,LUSC_hypoway,UCEC_hypoway
chr1:77332990-77334748	1	77332990	77334748	7	0	0	BLCA_hyper,COAD_hyper,ESCA_hyper,HNSC_hyper,LUAD_hyper,LUSC_hyper,PAAD_hyper
chr1:77384891-77547505	1	77384891	77547505	0	0	5	BLCA_hypoway,COAD_hypoway,LIHC_hypoway,LUSC_hypoway,UCEC_hypoway
chr1:77747373-77748728	1	77747373	77748728	3	0	0	COAD_hyper,HNSC_hyper,LUAD_hyper
chr1:77751442-77940194	1	77751442	77940194	1	0	3	HNSC_hypoway,KIRP_hyper,LIHC_hypoway,LUSC_hypoway
chr1:78511343-78512129	1	78511343	78512129	5	1	0	BRCA_hyper,HNSC_hyper,KIRC_hypo,LUAD_hyper,LUSC_hyper,PRAD_hyper
chr1:78693898-78892408	1	78693898	78892408	0	0	4	BLCA_hypoway,BRCA_hypoway,HNSC_hypoway,LUSC_hypoway
chr1:78956569-78957515	1	78956569	78957515	6	0	0	BRCA_hyper,COAD_hyper,HNSC_hyper,LUAD_hyper,LUSC_hyper,PAAD_hyper
chr1:81001616-81624482	1	81001616	81624482	0	0	5	BLCA_hypoway,HNSC_hypoway,LUAD_hypoway,LUSC_hypoway,PRAD_hypoway
chr1:81797257-82070684	1	81797257	82070684	0	0	6	BLCA_hypoway,BRCA_hypoway,COAD_hypoway,HNSC_hypoway,LIHC_hypoway,LUSC_hypoway
chr1:82268280-82269526	1	82268280	82269526	1	0	0	COAD_hyper
chr1:82591535-84106312	1	82591535	84106312	0	0	7	BLCA_hypoway,COAD_hypoway,HNSC_hypoway,LIHC_hypoway,LUAD_hypoway,LUSC_hypoway,UCEC_hypoway
chr1:84326184-84327319	1	84326184	84327319	0	5	0	BLCA_hypo,BRCA_hypo,KIRP_hypo,LUAD_hypo,UCEC_hypo
chr1:84795526-84876625	1	84795526	84876625	0	0	2	LIHC_hypoway,LUSC_hypoway
chr1:86621930-86622737	1	86621930	86622737	2	0	0	LUSC_hyper,PAAD_hyper
chr1:86888584-87019175	1	86888584	87019175	0	0	6	BLCA_hypoway,BRCA_hypoway,HNSC_hypoway,KIRC_hypoway,LIHC_hypoway,LUSC_hypoway
chr1:88196408-88763257	1	88196408	88763257	0	0	3	COAD_hypoway,LIHC_hypoway,PRAD_hypoway
chr1:89357907-89406505	1	89357907	89406505	0	0	4	BLCA_hypoway,LIHC_hypoway,LUSC_hypoway,UCEC_hypoway
chr1:89664259-89664782	1	89664259	89664782	0	2	0	HNSC_hypo,PAAD_hypo
chr1:91172287-91173232	1	91172287	91173232	5	0	0	BRCA_hyper,COAD_hyper,HNSC_hyper,LUAD_hyper,PAAD_hyper
chr1:91182776-91185922	1	91182776	91185922	13	0	0	BLCA_hyper,BRCA_hyper,COAD_hyper,ESCA_hyper,HNSC_hyper,KIRC_hyper,KIRP_hyper,LIHC_hyper,LUAD_hyper,LUSC_hyper,PAAD_hyper,PRAD_hyper,UCEC_hyper
chr1:91189449-91190891	1	91189449	91190891	10	0	0	BLCA_hyper,BRCA_hyper,COAD_hyper,ESCA_hyper,HNSC_hyper,LUAD_hyper,LUSC_hyper,PAAD_hyper,PRAD_hyper,UCEC_hyper
chr1:91192450-91195504	1	91192450	91195504	11	0	0	BLCA_hyper,BRCA_hyper,COAD_hyper,ESCA_hyper,HNSC_hyper,LIHC_hyper,LUAD_hyper,LUSC_hyper,PAAD_hyper,PRAD_hyper,UCEC_hyper
chr1:91301203-91301962	1	91301203	91301962	8	0	0	BRCA_hyper,COAD_hyper,ESCA_hyper,HNSC_hyper,LUAD_hyper,LUSC_hyper,PRAD_hyper,UCEC_hyper
chr1:91869781-91870450	1	91869781	91870450	3	0	0	COAD_hyper,PAAD_hyper,PRAD_hyper
chr1:92011731-92102055	1	92011731	92102055	0	0	6	BLCA_hypoway,HNSC_hypoway,LIHC_hypoway,LUAD_hypoway,LUSC_hypoway,UCEC_hypoway
chr1:92650643-92683821	1	92650643	92683821	0	0	2	HNSC_hypoway,LIHC_hypoway
chr1:92946131-92947588	1	92946131	92947588	11	0	0	BRCA_hyper,COAD_hyper,ESCA_hyper,HNSC_hyper,KIRC_hyper,KIRP_hyper,LIHC_hyper,LUAD_hyper,LUSC_hyper,PRAD_hyper,UCEC_hyper
chr1:94560850-94587076	1	94560850	94587076	2	0	3	COAD_hypoway,HNSC_hypoway,KIRC_hyper,KIRP_hyper,UCEC_hypoway
chr1:95009676-95179425	1	95009676	95179425	0	0	5	BLCA_hypoway,HNSC_hypoway,LIHC_hypoway,LUSC_hypoway,PAAD_hypoway
chr1:95392674-95437072	1	95392674	95437072	2	0	0	LUSC_hyper,PRAD_hyper
chr1:95698377-95699313	1	95698377	95699313	4	0	0	ESCA_hyper,HNSC_hyper,LUSC_hyper,UCEC_hyper
chr1:96048159-96672496	1	96048159	96672496	0	0	5	BLCA_hypoway,LIHC_hypoway,LUAD_hypoway,PRAD_hypoway,UCEC_hypoway
chr1:97046755-97186897	1	97046755	97186897	0	0	2	BLCA_hypoway,COAD_hypoway
chr1:97559807-98336448	1	97559807	98336448	0	0	5	BLCA_hypoway,COAD_hypoway,LIHC_hypoway,LUSC_hypoway,UCEC_hypoway
chr1:98510864-98511908	1	98510864	98511908	10	0	0	BLCA_hyper,BRCA_hyper,COAD_hyper,ESCA_hyper,HNSC_hyper,LUAD_hyper,LUSC_hyper,PAAD_hyper,PRAD_hyper,UCEC_hyper
chr1:99469818-99470801	1	99469818	99470801	8	0	0	BRCA_hyper,COAD_hyper,ESCA_hyper,HNSC_hyper,LUAD_hyper,LUSC_hyper,PAAD_hyper,PRAD_hyper
chr1:99729756-99729807	1	99729756	99729807	5	0	0	BRCA_hyper,COAD_hyper,HNSC_hyper,LUAD_hyper,PAAD_hyper
chr1:101004471-101005509	1	101004471	101005509	6	0	0	BRCA_hyper,COAD_hyper,HNSC_hyper,LUAD_hyper,PAAD_hyper,PRAD_hyper
chr1:101072807-101313199	1	101072807	101313199	1	0	7	BLCA_hypoway,COAD_hypoway,HNSC_hypoway,KIRC_hypoway,LUAD_hypoway,LUSC_hypoway,PAAD_hyper,UCEC_hypoway
chr1:101701818-101703749	1	101701818	101703749	5	0	0	BRCA_hyper,COAD_hyper,ESCA_hyper,LUAD_hyper,PAAD_hyper
chr1:102312607-102462821	1	102312607	102462821	5	0	0	BRCA_hyper,COAD_hyper,HNSC_hyper,LUAD_hyper,PAAD_hyper
chr1:103572722-103574532	1	103572722	103574532	10	0	0	BRCA_hyper,COAD_hyper,ESCA_hyper,HNSC_hyper,KIRC_hyper,LUAD_hyper,LUSC_hyper,PAAD_hyper,PRAD_hyper,UCEC_hyper
chr1:104096516-104696931	1	104096516	104696931	0	0	7	BLCA_hypoway,ESCA_hypoway,HNSC_hypoway,LIHC_hypoway,LUSC_hypoway,PRAD_hypoway,UCEC_hypoway
chr1:107682301-107683187	1	107682301	107683187	3	0	0	COAD_hyper,LUAD_hyper,PRAD_hyper
chr1:108506811-108508548	1	108506811	108508548	3	0	0	COAD_hyper,LUAD_hyper,PAAD_hyper
chr1:110230251-110255096	1	110230251	110255096	8	0	0	BLCA_hyper,BRCA_hyper,HNSC_hyper,LIHC_hyper,LUAD_hyper,LUSC_hyper,PRAD_hyper,UCEC_hyper
chr1:110303482-110307912	1	110303482	110307912	0	5	0	BLCA_hypo,HNSC_hypo,LUAD_hypo,LUSC_hypo,PAAD_hypo
chr1:110610898-110612375	1	110610898	110612375	11	0	0	BLCA_hyper,BRCA_hyper,COAD_hyper,ESCA_hyper,HNSC_hyper,LIHC_hyper,LUAD_hyper,LUSC_hyper,PAAD_hyper,PRAD_hyper,UCEC_hyper
chr1:110626539-110627590	1	110626539	110627590	3	0	0	BRCA_hyper,LUSC_hyper,PRAD_hyper
chr1:110692899-110694263	1	110692899	110694263	8	0	0	BRCA_hyper,COAD_hyper,ESCA_hyper,HNSC_hyper,LUAD_hyper,LUSC_hyper,PAAD_hyper,PRAD_hyper
chr1:110715663-110741823	1	110715663	110741823	0	0	5	BLCA_hypoway,HNSC_hypoway,LIHC_hypoway,LUSC_hypoway,UCEC_hypoway
chr1:110763077-110777870	1	110763077	110777870	0	0	2	BLCA_hypoway,LIHC_hypoway
chr1:110976748-111015513	1	110976748	111015513	0	0	5	BLCA_hypoway,COAD_hypoway,HNSC_hypoway,LIHC_hypoway,LUSC_hypoway
chr1:111097900-111098456	1	111097900	111098456	5	0	0	BRCA_hyper,HNSC_hyper,LUAD_hyper,PAAD_hyper,PRAD_hyper
chr1:111102143-111148339	1	111102143	111148339	0	0	3	BLCA_hypoway,HNSC_hypoway,LIHC_hypoway
chr1:111216838-111218079	1	111216838	111218079	8	0	0	BLCA_hyper,BRCA_hyper,COAD_hyper,ESCA_hyper,HNSC_hyper,LUSC_hyper,PAAD_hyper,PRAD_hyper
chr1:111218553-111323224	1	111218553	111323224	0	0	6	BLCA_hypoway,HNSC_hypoway,LIHC_hypoway,LUSC_hypoway,PRAD_hypoway,UCEC_hypoway
chr1:111742514-111744309	1	111742514	111744309	1	2	0	BLCA_hypo,BRCA_hypo,LUSC_hyper
chr1:111750609-111775891	1	111750609	111775891	0	0	2	LIHC_hypoway,LUSC_hypoway
chr1:111813306-111814208	1	111813306	111814208	10	0	0	BLCA_hyper,BRCA_hyper,COAD_hyper,ESCA_hyper,HNSC_hyper,LUAD_hyper,LUSC_hyper,PAAD_hyper,PRAD_hyper,UCEC_hyper
chr1:111822042-111854339	1	111822042	111854339	0	0	7	BLCA_hypoway,COAD_hypoway,ESCA_hypoway,HNSC_hypoway,LIHC_hypoway,LUSC_hypoway,PAAD_hypoway
chr1:111890798-111970531	1	111890798	111970531	0	0	8	BLCA_hypoway,COAD_hypoway,ESCA_hypoway,HNSC_hypoway,LIHC_hypoway,LUAD_hypoway,LUSC_hypoway,PAAD_hypoway
chr1:112042857-112048205	1	112042857	112048205	0	5	0	BLCA_hypo,HNSC_hypo,LIHC_hypo,LUSC_hypo,UCEC_hypo
chr1:112446797-112528161	1	112446797	112528161	0	0	8	BLCA_hypoway,COAD_hypoway,ESCA_hypoway,HNSC_hypoway,LIHC_hypoway,LUAD_hypoway,LUSC_hypoway,UCEC_hypoway
chr1:113051684-113056151	1	113051684	113056151	4	0	0	BRCA_hyper,KIRC_hyper,KIRP_hyper,PRAD_hyper
chr1:113265409-113265753	1	113265409	113265753	6	0	0	BRCA_hyper,ESCA_hyper,LUAD_hyper,LUSC_hyper,PRAD_hyper,UCEC_hyper
chr1:113285386-113287238	1	113285386	113287238	5	0	0	BRCA_hyper,LUAD_hyper,LUSC_hyper,PRAD_hyper,UCEC_hyper
chr1:114218185-114300298	1	114218185	114300298	0	0	1	LUSC_hypoway
chr1:114423725-114431234	1	114423725	114431234	0	5	0	BLCA_hypo,COAD_hypo,LIHC_hypo,LUAD_hypo,UCEC_hypo
chr1:114696349-114697113	1	114696349	114697113	9	0	0	BRCA_hyper,COAD_hyper,HNSC_hyper,LIHC_hyper,LUAD_hyper,LUSC_hyper,PAAD_hyper,PRAD_hyper,UCEC_hyper
chr1:115632037-115632727	1	115632037	115632727	2	0	0	BRCA_hyper,PAAD_hyper
chr1:115828678-115877962	1	115828678	115877962	0	0	8	BLCA_hypoway,BRCA_hypoway,COAD_hypoway,HNSC_hypoway,LIHC_hypoway,LUSC_hypoway,PRAD_hypoway,UCEC_hypoway
chr1:115880071-115880935	1	115880071	115880935	4	0	0	BRCA_hyper,COAD_hyper,PAAD_hyper,PRAD_hyper
chr1:116250017-116369577	1	116250017	116369577	1	0	4	COAD_hypoway,LIHC_hypoway,LUSC_hypoway,PAAD_hypoway,UCEC_hyper
chr1:116370763-116371337	1	116370763	116371337	6	0	0	BRCA_hyper,ESCA_hyper,HNSC_hyper,LUAD_hyper,LUSC_hyper,PRAD_hyper
chr1:116380315-116383634	1	116380315	116383634	3	0	0	LUAD_hyper,LUSC_hyper,PRAD_hyper
chr1:117117194-117306669	1	117117194	117306669	0	0	3	KIRC_hypoway,LIHC_hypoway,LUSC_hypoway
chr1:117317837-117318232	1	117317837	117318232	2	0	0	HNSC_hyper,LUSC_hyper
chr1:117527581-117544781	1	117527581	117544781	0	0	1	KIRC_hypoway
chr1:117722651-117754304	1	117722651	117754304	2	0	6	BLCA_hypoway,BRCA_hypoway,KIRC_hyper,LUAD_hypoway,LUSC_hypoway,PAAD_hypoway,PRAD_hyper,UCEC_hypoway
chr1:118165132-118168275	1	118165132	118168275	1	1	0	LIHC_hypo,PAAD_hyper
chr1:118727657-118728086	1	118727657	118728086	3	0	0	ESCA_hyper,LUSC_hyper,PRAD_hyper
chr1:119531624-119540044	1	119531624	119540044	13	0	0	BLCA_hyper,BRCA_hyper,COAD_hyper,ESCA_hyper,HNSC_hyper,KIRC_hyper,KIRP_hyper,LIHC_hyper,LUAD_hyper,LUSC_hyper,PAAD_hyper,PRAD_hyper,UCEC_hyper
chr1:119548526-119550803	1	119548526	119550803	10	0	0	BLCA_hyper,COAD_hyper,ESCA_hyper,HNSC_hyper,LIHC_hyper,LUAD_hyper,LUSC_hyper,PAAD_hyper,PRAD_hyper,UCEC_hyper
chr1:119910204-120050104	1	119910204	120050104	0	0	5	BLCA_hypoway,BRCA_hypoway,COAD_hypoway,HNSC_hypoway,LUAD_hypoway
chr1:120439395-120441702	1	120439395	120441702	0	3	0	BLCA_hypo,HNSC_hypo,LUSC_hypo
chr1:120837954-120906047	1	120837954	120906047	2	0	0	BRCA_hyper,COAD_hyper
chr1:121260493-121261602	1	121260493	121261602	2	0	0	COAD_hyper,HNSC_hyper
chr1:142802298-143651192	1	142802298	143651192	0	0	11	BLCA_hypoway,BRCA_hypoway,COAD_hypoway,HNSC_hypoway,KIRC_hypoway,KIRP_hypoway,LIHC_hypoway,LUAD_hypoway,LUSC_hypoway,PRAD_hypoway,UCEC_hypoway
chr1:143913408-144340251	1	143913408	144340251	2	0	0	BRCA_hyper,COAD_hyper
chr1:144814627-144892566	1	144814627	144892566	0	0	1	COAD_hypoway
chr1:145473004-145473700	1	145473004	145473700	2	0	0	COAD_hyper,PRAD_hyper
chr1:146503899-146522878	1	146503899	146522878	0	0	7	BLCA_hypoway,COAD_hypoway,HNSC_hypoway,LIHC_hypoway,LUAD_hypoway,LUSC_hypoway,UCEC_hypoway
chr1:146548468-146552552	1	146548468	146552552	11	0	0	BLCA_hyper,BRCA_hyper,COAD_hyper,ESCA_hyper,HNSC_hyper,LIHC_hyper,LUAD_hyper,LUSC_hyper,PAAD_hyper,PRAD_hyper,UCEC_hyper
chr1:147143011-147233887	1	147143011	147233887	0	0	6	BLCA_hypoway,HNSC_hypoway,LIHC_hypoway,LUAD_hypoway,LUSC_hypoway,PRAD_hypoway
chr1:147374588-147384040	1	147374588	147384040	0	5	0	BLCA_hypo,BRCA_hypo,HNSC_hypo,LIHC_hypo,LUSC_hypo
chr1:147718156-147719039	1	147718156	147719039	13	0	0	BLCA_hyper,BRCA_hyper,COAD_hyper,ESCA_hyper,HNSC_hyper,KIRC_hyper,KIRP_hyper,LIHC_hyper,LUAD_hyper,LUSC_hyper,PAAD_hyper,PRAD_hyper,UCEC_hyper
chr1:147737015-147752892	1	147737015	147752892	6	0	0	BRCA_hyper,ESCA_hyper,LIHC_hyper,LUSC_hyper,PRAD_hyper,UCEC_hyper
chr1:147781599-147789973	1	147781599	147789973	13	0	0	BLCA_hyper,BRCA_hyper,COAD_hyper,ESCA_hyper,HNSC_hyper,KIRC_hyper,KIRP_hyper,LIHC_hyper,LUAD_hyper,LUSC_hyper,PAAD_hyper,PRAD_hyper,UCEC_hyper
chr1:147801089-147801789	1	147801089	147801789	8	0	0	BLCA_hyper,BRCA_hyper,ESCA_hyper,HNSC_hyper,LUAD_hyper,LUSC_hyper,PRAD_hyper,UCEC_hyper
chr1:148854227-148855760	1	148854227	148855760	9	0	0	BLCA_hyper,BRCA_hyper,COAD_hyper,ESCA_hyper,HNSC_hyper,LUAD_hyper,LUSC_hyper,PAAD_hyper,UCEC_hyper
chr1:148858156-149109519	1	148858156	149109519	0	0	10	BLCA_hypoway,BRCA_hypoway,HNSC_hypoway,KIRC_hypoway,KIRP_hypoway,LIHC_hypoway,LUAD_hypoway,LUSC_hypoway,PRAD_hypoway,UCEC_hypoway
chr1:149284763-149288143	1	149284763	149288143	12	0	0	BLCA_hyper,BRCA_hyper,COAD_hyper,ESCA_hyper,HNSC_hyper,KIRC_hyper,KIRP_hyper,LIHC_hyper,LUAD_hyper,LUSC_hyper,PRAD_hyper,UCEC_hyper
chr1:149399173-149400352	1	149399173	149400352	9	0	0	BLCA_hyper,BRCA_hyper,COAD_hyper,ESCA_hyper,HNSC_hyper,LUAD_hyper,LUSC_hyper,PRAD_hyper,UCEC_hyper
chr1:149670339-149673689	1	149670339	149673689	13	0	0	BLCA_hyper,BRCA_hyper,COAD_hyper,ESCA_hyper,HNSC_hyper,KIRC_hyper,KIRP_hyper,LIHC_hyper,LUAD_hyper,LUSC_hyper,PAAD_hyper,PRAD_hyper,UCEC_hyper
chr1:149783777-149785211	1	149783777	149785211	6	0	0	BLCA_hyper,BRCA_hyper,COAD_hyper,ESCA_hyper,LUSC_hyper,UCEC_hyper
chr1:149908312-149909548	1	149908312	149909548	0	2	0	BLCA_hypo,LIHC_hypo
chr1:150121724-150123734	1	150121724	150123734	1	0	0	COAD_hyper
chr1:150253841-150255241	1	150253841	150255241	1	1	0	COAD_hyper,LUAD_hypo
chr1:150529663-150530531	1	150529663	150530531	0	1	0	LUSC_hypo
chr1:151007924-151019727	1	151007924	151019727	0	0	3	BLCA_hypoway,LUSC_hypoway,PAAD_hypoway
chr1:151103641-151105049	1	151103641	151105049	7	0	0	BRCA_hyper,HNSC_hyper,KIRC_hyper,KIRP_hyper,LIHC_hyper,LUSC_hyper,PRAD_hyper
chr1:151693502-151694320	1	151693502	151694320	2	0	0	BRCA_hyper,PRAD_hyper
chr1:151767753-151800000	1	151767753	151800000	1	0	8	BLCA_hypoway,COAD_hypoway,HNSC_hypoway,KIRC_hypoway,KIRP_hyper,LIHC_hypoway,LUAD_hypoway,LUSC_hypoway,PAAD_hypoway
chr1:151881784-151882406	1	151881784	151882406	1	0	0	LUSC_hyper
chr1:152086691-152132853	1	152086691	152132853	0	0	8	BLCA_hypoway,BRCA_hypoway,COAD_hypoway,HNSC_hypoway,LIHC_hypoway,LUAD_hypoway,PRAD_hypoway,UCEC_hypoway
chr1:152280067-152331529	1	152280067	152331529	0	0	9	BLCA_hypoway,BRCA_hypoway,COAD_hypoway,HNSC_hypoway,LIHC_hypoway,LUAD_hypoway,LUSC_hypoway,PRAD_hypoway,UCEC_hypoway
chr1:152538379-152553096	1	152538379	152553096	0	0	8	BLCA_hypoway,BRCA_hypoway,COAD_hypoway,LIHC_hypoway,LUAD_hypoway,LUSC_hypoway,PRAD_hypoway,UCEC_hypoway
chr1:152635877-152691125	1	152635877	152691125	0	0	12	BLCA_hypoway,BRCA_hypoway,COAD_hypoway,HNSC_hypoway,KIRC_hypoway,KIRP_hypoway,LIHC_hypoway,LUAD_hypoway,LUSC_hypoway,PAAD_hypoway,PRAD_hypoway,UCEC_hypoway
chr1:152798911-152815068	1	152798911	152815068	0	0	9	BLCA_hypoway,BRCA_hypoway,COAD_hypoway,HNSC_hypoway,LIHC_hypoway,LUAD_hypoway,LUSC_hypoway,PRAD_hypoway,UCEC_hypoway
chr1:152973719-153030751	1	152973719	153030751	0	0	11	BLCA_hypoway,BRCA_hypoway,COAD_hypoway,KIRC_hypoway,KIRP_hypoway,LIHC_hypoway,LUAD_hypoway,LUSC_hypoway,PAAD_hypoway,PRAD_hypoway,UCEC_hypoway
chr1:153114001-153177577	1	153114001	153177577	0	0	10	BLCA_hypoway,BRCA_hypoway,COAD_hypoway,HNSC_hypoway,LIHC_hypoway,LUAD_hypoway,LUSC_hypoway,PAAD_hypoway,PRAD_hypoway,UCEC_hypoway
chr1:153362926-153413641	1	153362926	153413641	0	0	10	BLCA_hypoway,BRCA_hypoway,COAD_hypoway,ESCA_hypoway,HNSC_hypoway,LIHC_hypoway,LUAD_hypoway,LUSC_hypoway,PRAD_hypoway,UCEC_hypoway
chr1:153505650-153509323	1	153505650	153509323	1	0	0	PRAD_hyper
chr1:153514263-153522973	1	153514263	153522973	3	2	0	BRCA_hyper,HNSC_hyper,KIRP_hyper,LIHC_hypo,PAAD_hypo
chr1:153538405-153540839	1	153538405	153540839	1	8	0	BLCA_hypo,COAD_hypo,ESCA_hypo,KIRC_hypo,KIRP_hypo,LIHC_hypo,PAAD_hypo,PRAD_hyper,UCEC_hypo
chr1:153581493-153585915	1	153581493	153585915	1	2	0	BLCA_hypo,PAAD_hypo,PRAD_hyper
chr1:153600761-153603048	1	153600761	153603048	0	6	0	BLCA_hypo,LIHC_hypo,LUAD_hypo,LUSC_hypo,PAAD_hypo,UCEC_hypo
chr1:154164053-154167437	1	154164053	154167437	0	5	0	BLCA_hypo,BRCA_hypo,COAD_hypo,HNSC_hypo,LUSC_hypo
chr1:154298334-154298956	1	154298334	154298956	2	0	0	COAD_hyper,PRAD_hyper
chr1:154474107-154475688	1	154474107	154475688	7	0	0	BLCA_hyper,BRCA_hyper,COAD_hyper,LIHC_hyper,LUAD_hyper,PAAD_hyper,PRAD_hyper
chr1:154540903-154548273	1	154540903	154548273	0	10	0	BLCA_hypo,BRCA_hypo,COAD_hypo,ESCA_hypo,HNSC_hypo,LIHC_hypo,LUAD_hypo,LUSC_hypo,PRAD_hypo,UCEC_hypo
chr1:154742819-154839983	1	154742819	154839983	1	0	7	BLCA_hypoway,BRCA_hypoway,COAD_hypoway,HNSC_hypoway,KIRP_hyper,LIHC_hypoway,LUSC_hypoway,UCEC_hypoway
chr1:154842716-154843050	1	154842716	154843050	1	0	0	BRCA_hyper
chr1:155043321-155044345	1	155043321	155044345	1	1	0	BRCA_hyper,PAAD_hypo
chr1:155264371-155265378	1	155264371	155265378	10	0	0	BRCA_hyper,ESCA_hyper,HNSC_hyper,KIRC_hyper,KIRP_hyper,LUAD_hyper,LUSC_hyper,PAAD_hyper,PRAD_hyper,UCEC_hyper
chr1:155290235-155291345	1	155290235	155291345	10	0	0	BLCA_hyper,BRCA_hyper,COAD_hyper,ESCA_hyper,HNSC_hyper,KIRC_hyper,KIRP_hyper,LUAD_hyper,PRAD_hyper,UCEC_hyper
chr1:155904846-155912569	1	155904846	155912569	3	2	0	BRCA_hyper,LUAD_hyper,LUSC_hyper,PAAD_hypo,UCEC_hypo
chr1:156122708-156124322	1	156122708	156124322	2	3	0	BLCA_hypo,KIRC_hyper,KIRP_hyper,LUSC_hypo,UCEC_hypo
chr1:156211408-156212005	1	156211408	156212005	0	9	0	BLCA_hypo,COAD_hypo,ESCA_hypo,HNSC_hypo,KIRC_hypo,KIRP_hypo,LUAD_hypo,LUSC_hypo,PAAD_hypo
chr1:156261199-156261841	1	156261199	156261841	4	1	0	BRCA_hyper,HNSC_hyper,LUSC_hyper,PRAD_hypo,UCEC_hyper
chr1:156266749-156270281	1	156266749	156270281	0	3	0	BLCA_hypo,LUSC_hypo,UCEC_hypo
chr1:156357838-156358408	1	156357838	156358408	10	0	0	BRCA_hyper,COAD_hyper,ESCA_hyper,HNSC_hyper,KIRC_hyper,KIRP_hyper,LUAD_hyper,LUSC_hyper,PAAD_hyper,PRAD_hyper
chr1:156359252-156387415	1	156359252	156387415	0	0	6	BLCA_hypoway,COAD_hypoway,HNSC_hypoway,LIHC_hypoway,LUSC_hypoway,UCEC_hypoway
chr1:156390123-156391310	1	156390123	156391310	3	0	0	BRCA_hyper,PRAD_hyper,UCEC_hyper
chr1:156402677-156406711	1	156402677	156406711	9	0	0	BRCA_hyper,COAD_hyper,ESCA_hyper,HNSC_hyper,KIRC_hyper,LUAD_hyper,LUSC_hyper,PAAD_hyper,PRAD_hyper
chr1:156433711-156468722	1	156433711	156468722	10	0	0	BLCA_hyper,BRCA_hyper,COAD_hyper,ESCA_hyper,HNSC_hyper,KIRP_hyper,LUAD_hyper,LUSC_hyper,PAAD_hyper,UCEC_hyper
chr1:156572730-156593698	1	156572730	156593698	0	0	2	BLCA_hypoway,UCEC_hypoway
chr1:156611962-156616855	1	156611962	156616855	13	0	0	BLCA_hyper,BRCA_hyper,COAD_hyper,ESCA_hyper,HNSC_hyper,KIRC_hyper,KIRP_hyper,LIHC_hyper,LUAD_hyper,LUSC_hyper,PAAD_hyper,PRAD_hyper,UCEC_hyper
chr1:156631234-156646746	1	156631234	156646746	3	0	2	BRCA_hyper,ESCA_hyper,KIRC_hypoway,KIRP_hypoway,PRAD_hyper
chr1:156786009-156811518	1	156786009	156811518	0	0	3	BLCA_hypoway,COAD_hypoway,HNSC_hypoway
chr1:156814487-156815774	1	156814487	156815774	9	0	0	BLCA_hyper,COAD_hyper,ESCA_hyper,HNSC_hyper,LUAD_hyper,LUSC_hyper,PAAD_hyper,PRAD_hyper,UCEC_hyper
chr1:156828692-156830334	1	156828692	156830334	2	0	0	BRCA_hyper,LUAD_hyper
chr1:156877121-156880456	1	156877121	156880456	0	4	0	BLCA_hypo,LUAD_hypo,LUSC_hypo,UCEC_hypo
chr1:156893348-156894534	1	156893348	156894534	5	0	0	BRCA_hyper,COAD_hyper,HNSC_hyper,LUAD_hyper,PAAD_hyper
chr1:157062169-157085163	1	157062169	157085163	0	0	4	COAD_hypoway,HNSC_hypoway,LIHC_hypoway,PRAD_hypoway
chr1:157485455-157805906	1	157485455	157805906	0	0	11	BLCA_hypoway,BRCA_hypoway,COAD_hypoway,ESCA_hypoway,HNSC_hypoway,KIRC_hypoway,LIHC_hypoway,LUAD_hypoway,LUSC_hypoway,PRAD_hypoway,UCEC_hypoway
chr1:157963022-157972005	1	157963022	157972005	1	0	0	PRAD_hyper
chr1:157995039-158079311	1	157995039	158079311	0	0	5	BLCA_hypoway,BRCA_hypoway,LIHC_hypoway,LUSC_hypoway,PRAD_hypoway
chr1:158150580-158151363	1	158150580	158151363	5	0	0	BRCA_hyper,COAD_hyper,HNSC_hyper,PAAD_hyper,PRAD_hyper
chr1:158300732-158900644	1	158300732	158900644	0	0	10	BLCA_hypoway,BRCA_hypoway,COAD_hypoway,ESCA_hypoway,HNSC_hypoway,LIHC_hypoway,LUAD_hypoway,LUSC_hypoway,PRAD_hypoway,UCEC_hypoway
chr1:159043550-159140702	1	159043550	159140702	0	0	11	BLCA_hypoway,BRCA_hypoway,COAD_hypoway,ESCA_hypoway,HNSC_hypoway,KIRC_hypoway,LIHC_hypoway,LUAD_hypoway,LUSC_hypoway,PRAD_hypoway,UCEC_hypoway
chr1:159258876-159558512	1	159258876	159558512	0	0	11	BLCA_hypoway,BRCA_hypoway,COAD_hypoway,ESCA_hypoway,HNSC_hypoway,LIHC_hypoway,LUAD_hypoway,LUSC_hypoway,PAAD_hypoway,PRAD_hypoway,UCEC_hypoway
chr1:159770135-159820326	1	159770135	159820326	0	0	6	BLCA_hypoway,BRCA_hypoway,HNSC_hypoway,KIRC_hypoway,LIHC_hypoway,LUSC_hypoway
chr1:159866557-159870915	1	159866557	159870915	1	4	0	BLCA_hypo,BRCA_hypo,LIHC_hyper,LUAD_hypo,UCEC_hypo
chr1:160011012-160038302	1	160011012	160038302	0	0	4	BLCA_hypoway,HNSC_hypoway,LIHC_hypoway,LUSC_hypoway
chr1:160039846-160040667	1	160039846	160040667	1	0	0	BRCA_hyper
chr1:160112672-160147442	1	160112672	160147442	0	0	7	BLCA_hypoway,COAD_hypoway,ESCA_hypoway,HNSC_hypoway,LIHC_hypoway,LUAD_hypoway,LUSC_hypoway
chr1:160492860-160520625	1	160492860	160520625	0	0	6	BLCA_hypoway,BRCA_hypoway,LIHC_hypoway,LUSC_hypoway,PRAD_hypoway,UCEC_hypoway
chr1:160607886-160617356	1	160607886	160617356	0	1	0	HNSC_hypo
chr1:161008126-161008977	1	161008126	161008977	0	6	0	BLCA_hypo,BRCA_hypo,KIRP_hypo,LUAD_hypo,LUSC_hypo,UCEC_hypo
chr1:161168855-161171632	1	161168855	161171632	6	0	0	BLCA_hyper,BRCA_hyper,KIRP_hyper,LUAD_hyper,PRAD_hyper,UCEC_hyper
chr1:161192548-161195527	1	161192548	161195527	1	4	0	BLCA_hypo,COAD_hypo,KIRC_hypo,KIRP_hyper,LIHC_hypo
chr1:161228202-161229027	1	161228202	161229027	1	0	0	COAD_hyper
chr1:161429269-161493357	1	161429269	161493357	0	0	7	BLCA_hypoway,BRCA_hypoway,HNSC_hypoway,LIHC_hypoway,LUSC_hypoway,PRAD_hypoway,UCEC_hypoway
chr1:161679460-161693088	1	161679460	161693088	0	0	9	BLCA_hypoway,BRCA_hypoway,COAD_hypoway,HNSC_hypoway,LIHC_hypoway,LUAD_hypoway,LUSC_hypoway,PRAD_hypoway,UCEC_hypoway
chr1:161695658-161697574	1	161695658	161697574	1	0	0	PRAD_hyper
chr1:161953592-161991612	1	161953592	161991612	0	0	6	BLCA_hypoway,BRCA_hypoway,HNSC_hypoway,LIHC_hypoway,LUAD_hypoway,LUSC_hypoway
chr1:162335174-162346511	1	162335174	162346511	0	0	2	ESCA_hypoway,LUSC_hypoway
chr1:162601333-162602559	1	162601333	162602559	6	0	0	BLCA_hyper,BRCA_hyper,KIRP_hyper,LUAD_hyper,PRAD_hyper,UCEC_hyper
chr1:162792091-162792613	1	162792091	162792613	1	0	0	PRAD_hyper
chr1:162816960-163037784	1	162816960	163037784	0	0	7	BLCA_hypoway,BRCA_hypoway,COAD_hypoway,LIHC_hypoway,LUAD_hypoway,LUSC_hypoway,UCEC_hypoway
chr1:163369082-163532110	1	163369082	163532110	0	0	8	BLCA_hypoway,BRCA_hypoway,ESCA_hypoway,HNSC_hypoway,LIHC_hypoway,LUAD_hypoway,LUSC_hypoway,UCEC_hypoway
chr1:164290178-164290833	1	164290178	164290833	2	0	0	LUAD_hyper,PAAD_hyper
chr1:164536134-164547119	1	164536134	164547119	8	0	1	BLCA_hyper,BRCA_hyper,COAD_hyper,HNSC_hyper,KIRC_hyper,KIRP_hyper,LIHC_hypoway,PRAD_hyper,UCEC_hyper
chr1:165089432-165186436	1	165089432	165186436	0	0	1	COAD_hypoway
chr1:165204409-165205506	1	165204409	165205506	5	0	0	BRCA_hyper,COAD_hyper,LUAD_hyper,PAAD_hyper,PRAD_hyper
chr1:165323691-165325169	1	165323691	165325169	10	0	0	BLCA_hyper,BRCA_hyper,COAD_hyper,ESCA_hyper,HNSC_hyper,LUAD_hyper,LUSC_hyper,PAAD_hyper,PRAD_hyper,UCEC_hyper
chr1:165413322-165414611	1	165413322	165414611	5	0	0	COAD_hyper,HNSC_hyper,LUAD_hyper,LUSC_hyper,PAAD_hyper
chr1:165910640-166124903	1	165910640	166124903	0	0	11	BLCA_hypoway,BRCA_hypoway,COAD_hypoway,ESCA_hypoway,HNSC_hypoway,LIHC_hypoway,LUAD_hypoway,LUSC_hypoway,PAAD_hypoway,PRAD_hypoway,UCEC_hypoway
chr1:166134281-166135267	1	166134281	166135267	6	0	0	BRCA_hyper,COAD_hyper,LUAD_hyper,PAAD_hyper,PRAD_hyper,UCEC_hyper
chr1:166889788-166890644	1	166889788	166890644	9	0	0	BRCA_hyper,COAD_hyper,ESCA_hyper,HNSC_hyper,LIHC_hyper,LUAD_hyper,LUSC_hyper,PAAD_hyper,UCEC_hyper
chr1:167042621-167088658	1	167042621	167088658	0	0	5	BLCA_hypoway,HNSC_hypoway,LIHC_hypoway,LUAD_hypoway,LUSC_hypoway
chr1:167090617-167091094	1	167090617	167091094	3	0	0	LUAD_hyper,LUSC_hyper,PRAD_hyper
chr1:167095592-167185259	1	167095592	167185259	1	0	2	LIHC_hypoway,LUSC_hypoway,PRAD_hyper
chr1:167408508-167409198	1	167408508	167409198	2	0	0	BRCA_hyper,LUAD_hyper
chr1:167427499-167454876	1	167427499	167454876	0	0	3	BLCA_hypoway,LIHC_hypoway,UCEC_hypoway
chr1:167485872-167489232	1	167485872	167489232	0	6	0	BLCA_hypo,BRCA_hypo,COAD_hypo,HNSC_hypo,LIHC_hypo,UCEC_hypo
chr1:168510168-168545835	1	168510168	168545835	0	0	2	LIHC_hypoway,PRAD_hypoway
chr1:169396634-169396868	1	169396634	169396868	11	0	0	BLCA_hyper,BRCA_hyper,COAD_hyper,ESCA_hyper,HNSC_hyper,LIHC_hyper,LUAD_hyper,LUSC_hyper,PAAD_hyper,PRAD_hyper,UCEC_hyper
chr1:170114480-170463730	1	170114480	170463730	3	0	4	BLCA_hypoway,COAD_hypoway,KIRC_hyper,KIRP_hyper,LIHC_hypoway,PRAD_hypoway,UCEC_hyper
chr1:170630456-170631431	1	170630456	170631431	9	0	0	BLCA_hyper,BRCA_hyper,ESCA_hyper,HNSC_hyper,LUAD_hyper,LUSC_hyper,PAAD_hyper,PRAD_hyper,UCEC_hyper
chr1:170634858-170640675	1	170634858	170640675	7	0	0	COAD_hyper,ESCA_hyper,HNSC_hyper,LUAD_hyper,LUSC_hyper,PAAD_hyper,UCEC_hyper
chr1:171604881-171640223	1	171604881	171640223	0	0	7	BLCA_hypoway,BRCA_hypoway,HNSC_hypoway,LIHC_hypoway,LUAD_hypoway,LUSC_hypoway,PRAD_hypoway
chr1:171810375-171811529	1	171810375	171811529	3	0	0	BRCA_hyper,LIHC_hyper,PAAD_hyper
chr1:172113505-172114419	1	172113505	172114419	5	0	0	BLCA_hyper,BRCA_hyper,KIRC_hyper,KIRP_hyper,UCEC_hyper
chr1:172801650-173175328	1	172801650	173175328	0	0	4	BLCA_hypoway,BRCA_hypoway,KIRC_hypoway,KIRP_hypoway
chr1:173638689-173639135	1	173638689	173639135	6	0	0	ESCA_hyper,HNSC_hyper,LIHC_hyper,LUAD_hyper,LUSC_hyper,PRAD_hyper
chr1:175013919-175050479	1	175013919	175050479	0	0	10	BLCA_hypoway,BRCA_hypoway,COAD_hypoway,ESCA_hypoway,HNSC_hypoway,LIHC_hypoway,LUAD_hypoway,LUSC_hypoway,PRAD_hypoway,UCEC_hypoway
chr1:175307996-175403347	1	175307996	175403347	0	0	9	BLCA_hypoway,COAD_hypoway,HNSC_hypoway,LIHC_hypoway,LUAD_hypoway,LUSC_hypoway,PAAD_hypoway,PRAD_hypoway,UCEC_hypoway
chr1:175490610-175549030	1	175490610	175549030	0	0	6	BLCA_hypoway,LIHC_hypoway,LUAD_hypoway,LUSC_hypoway,PRAD_hypoway,UCEC_hypoway
chr1:175570021-175886537	1	175570021	175886537	0	0	9	BLCA_hypoway,BRCA_hypoway,ESCA_hypoway,HNSC_hypoway,LIHC_hypoway,LUAD_hypoway,LUSC_hypoway,PAAD_hypoway,UCEC_hypoway
chr1:176521192-176831160	1	176521192	176831160	0	0	6	BLCA_hypoway,COAD_hypoway,ESCA_hypoway,HNSC_hypoway,LUSC_hypoway,UCEC_hypoway
chr1:177133535-177134266	1	177133535	177134266	7	0	0	BRCA_hyper,COAD_hyper,HNSC_hyper,LUAD_hyper,LUSC_hyper,PAAD_hyper,PRAD_hyper
chr1:177244230-177953700	1	177244230	177953700	1	0	10	BLCA_hypoway,COAD_hypoway,ESCA_hypoway,HNSC_hypoway,KIRC_hypoway,KIRP_hyper,LIHC_hypoway,LUAD_hypoway,LUSC_hypoway,PAAD_hypoway,UCEC_hypoway
chr1:178445640-178456270	1	178445640	178456270	6	0	0	ESCA_hyper,HNSC_hyper,LUAD_hyper,LUSC_hyper,PRAD_hyper,UCEC_hyper
chr1:178986263-178994355	1	178986263	178994355	2	2	0	COAD_hyper,KIRP_hyper,LUSC_hypo,UCEC_hypo
chr1:179544720-179545294	1	179544720	179545294	6	0	0	BRCA_hyper,HNSC_hyper,LUAD_hyper,LUSC_hyper,PRAD_hyper,UCEC_hyper
chr1:179557220-179560121	1	179557220	179560121	0	7	0	COAD_hypo,HNSC_hypo,KIRC_hypo,KIRP_hypo,LIHC_hypo,LUAD_hypo,LUSC_hypo
chr1:179711582-179713349	1	179711582	179713349	7	0	0	BRCA_hyper,COAD_hyper,HNSC_hyper,LUAD_hyper,LUSC_hyper,PAAD_hyper,PRAD_hyper
chr1:180201890-180205253	1	180201890	180205253	9	0	0	BLCA_hyper,BRCA_hyper,ESCA_hyper,HNSC_hyper,LUAD_hyper,LUSC_hyper,PAAD_hyper,PRAD_hyper,UCEC_hyper
chr1:181286639-181287805	1	181286639	181287805	7	0	0	BRCA_hyper,COAD_hyper,HNSC_hyper,LUAD_hyper,LUSC_hyper,PAAD_hyper,PRAD_hyper
chr1:181378759-181394054	1	181378759	181394054	0	0	9	BLCA_hypoway,BRCA_hypoway,COAD_hypoway,ESCA_hypoway,HNSC_hypoway,LIHC_hypoway,LUAD_hypoway,LUSC_hypoway,UCEC_hypoway
chr1:181451905-181452339	1	181451905	181452339	4	0	0	BRCA_hyper,HNSC_hyper,LUAD_hyper,PAAD_hyper
chr1:181700353-181775743	1	181700353	181775743	0	0	9	BLCA_hypoway,BRCA_hypoway,ESCA_hypoway,HNSC_hypoway,LIHC_hypoway,LUAD_hypoway,LUSC_hypoway,PRAD_hypoway,UCEC_hypoway
chr1:182270481-182354972	1	182270481	182354972	0	0	1	LIHC_hypoway
chr1:182368733-182525301	1	182368733	182525301	0	0	3	BLCA_hypoway,HNSC_hypoway,LUSC_hypoway
chr1:182602985-182667173	1	182602985	182667173	0	0	4	BLCA_hypoway,HNSC_hypoway,LIHC_hypoway,LUSC_hypoway
chr1:183155096-183155644	1	183155096	183155644	2	5	0	BLCA_hypo,BRCA_hypo,KIRC_hyper,LIHC_hyper,LUAD_hypo,LUSC_hypo,UCEC_hypo
chr1:183385960-183387564	1	183385960	183387564	5	0	0	BRCA_hyper,COAD_hyper,HNSC_hyper,LIHC_hyper,PAAD_hyper
chr1:183891359-184003184	1	183891359	184003184	0	0	5	BLCA_hypoway,BRCA_hypoway,HNSC_hypoway,LIHC_hypoway,LUSC_hypoway
chr1:184005359-184007101	1	184005359	184007101	1	0	0	COAD_hyper
chr1:184042578-184333152	1	184042578	184333152	0	0	5	BLCA_hypoway,HNSC_hypoway,LIHC_hypoway,LUAD_hypoway,LUSC_hypoway
chr1:184761872-184939506	1	184761872	184939506	0	0	2	COAD_hypoway,LIHC_hypoway
chr1:185743786-186177165	1	185743786	186177165	0	0	7	BLCA_hypoway,BRCA_hypoway,COAD_hypoway,KIRP_hypoway,LUAD_hypoway,LUSC_hypoway,PRAD_hypoway
chr1:186649518-186798107	1	186649518	186798107	2	0	0	BRCA_hyper,PRAD_hyper
chr1:187360077-187897629	1	187360077	187897629	0	0	4	BLCA_hypoway,HNSC_hypoway,LIHC_hypoway,UCEC_hypoway
chr1:190447231-190448126	1	190447231	190448126	1	0	0	HNSC_hyper
chr1:192544715-192608588	1	192544715	192608588	0	0	1	KIRC_hypoway
chr1:196577386-196578534	1	196577386	196578534	1	0	0	COAD_hyper
chr1:197191365-197704881	1	197191365	197704881	0	0	4	BLCA_hypoway,ESCA_hypoway,LIHC_hypoway,LUSC_hypoway
chr1:197879379-197881540	1	197879379	197881540	4	0	0	BRCA_hyper,COAD_hyper,LUAD_hyper,PRAD_hyper
chr1:197882002-197883190	1	197882002	197883190	7	0	0	BRCA_hyper,COAD_hyper,ESCA_hyper,LIHC_hyper,LUAD_hyper,LUSC_hyper,PRAD_hyper
chr1:197887954-197889693	1	197887954	197889693	10	0	0	BLCA_hyper,BRCA_hyper,COAD_hyper,ESCA_hyper,HNSC_hyper,LUAD_hyper,LUSC_hyper,PAAD_hyper,PRAD_hyper,UCEC_hyper
chr1:198606674-198649189	1	198606674	198649189	0	0	3	HNSC_hypoway,KIRC_hypoway,KIRP_hypoway
chr1:198669985-198883434	1	198669985	198883434	0	0	7	BLCA_hypoway,COAD_hypoway,ESCA_hypoway,HNSC_hypoway,LIHC_hypoway,LUSC_hypoway,PRAD_hypoway
chr1:198907516-199372786	1	198907516	199372786	0	0	7	BLCA_hypoway,COAD_hypoway,ESCA_hypoway,HNSC_hypoway,LIHC_hypoway,LUSC_hypoway,PRAD_hypoway
chr1:200116536-200196840	1	200116536	200196840	0	0	3	BLCA_hypoway,HNSC_hypoway,LUSC_hypoway
chr1:200842125-200843333	1	200842125	200843333	12	0	0	BLCA_hyper,BRCA_hyper,COAD_hyper,ESCA_hyper,HNSC_hyper,KIRC_hyper,KIRP_hyper,LIHC_hyper,LUAD_hyper,LUSC_hyper,PRAD_hyper,UCEC_hyper
chr1:200992282-200992788	1	200992282	200992788	1	0	0	PRAD_hyper
chr1:201159146-201199004	1	201159146	201199004	0	0	9	BLCA_hypoway,BRCA_hypoway,HNSC_hypoway,KIRC_hypoway,LIHC_hypoway,LUAD_hypoway,LUSC_hypoway,PAAD_hypoway,UCEC_hypoway
chr1:201347478-201437298	1	201347478	201437298	1	0	9	BLCA_hypoway,COAD_hypoway,HNSC_hypoway,KIRC_hypoway,LIHC_hypoway,LUAD_hypoway,LUSC_hypoway,PAAD_hypoway,PRAD_hyper,UCEC_hypoway
chr1:201561163-201615401	1	201561163	201615401	0	0	10	BLCA_hypoway,BRCA_hypoway,COAD_hypoway,ESCA_hypoway,HNSC_hypoway,LIHC_hypoway,LUAD_hypoway,LUSC_hypoway,PAAD_hypoway,UCEC_hypoway
chr1:201708499-201709675	1	201708499	201709675	1	7	0	BLCA_hypo,BRCA_hypo,HNSC_hypo,KIRC_hyper,KIRP_hypo,LUAD_hypo,LUSC_hypo,UCEC_hypo
chr1:201720357-201797722	1	201720357	201797722	0	0	1	LIHC_hypoway
chr1:201914026-201915999	1	201914026	201915999	2	1	0	BRCA_hyper,ESCA_hyper,LUAD_hypo
chr1:201977389-201979938	1	201977389	201979938	1	7	0	BLCA_hypo,BRCA_hypo,KIRC_hyper,KIRP_hypo,LIHC_hypo,LUAD_hypo,LUSC_hypo,UCEC_hypo
chr1:202091864-202092005	1	202091864	202092005	3	1	0	ESCA_hyper,LUSC_hyper,PRAD_hypo,UCEC_hyper
chr1:202128681-202131184	1	202128681	202131184	0	3	0	HNSC_hypo,KIRC_hypo,KIRP_hypo
chr1:202679088-202679768	1	202679088	202679768	3	0	0	BRCA_hyper,COAD_hyper,LUAD_hyper
chr1:202998358-203040823	1	202998358	203040823	0	0	8	BLCA_hypoway,BRCA_hypoway,COAD_hypoway,HNSC_hypoway,KIRC_hypoway,LIHC_hypoway,PAAD_hypoway,UCEC_hypoway
chr1:203046884-203056150	1	203046884	203056150	0	7	0	BLCA_hypo,COAD_hypo,LIHC_hypo,LUAD_hypo,LUSC_hypo,PRAD_hypo,UCEC_hypo
chr1:203134553-203152295	1	203134553	203152295	0	0	6	BLCA_hypoway,HNSC_hypoway,LIHC_hypoway,LUAD_hypoway,LUSC_hypoway,UCEC_hypoway
chr1:203297710-203456019	1	203297710	203456019	0	0	5	BLCA_hypoway,HNSC_hypoway,LIHC_hypoway,LUAD_hypoway,LUSC_hypoway
chr1:203462520-203567067	1	203462520	203567067	0	0	4	COAD_hypoway,KIRC_hypoway,LIHC_hypoway,LUSC_hypoway
chr1:203596939-203599089	1	203596939	203599089	4	0	0	COAD_hyper,LIHC_hyper,LUSC_hyper,PRAD_hyper
chr1:204304656-204329307	1	204304656	204329307	6	0	0	BLCA_hyper,BRCA_hyper,KIRP_hyper,LUAD_hyper,PRAD_hyper,UCEC_hyper
chr1:204655677-204719449	1	204655677	204719449	0	0	6	BLCA_hypoway,COAD_hypoway,LIHC_hypoway,LUAD_hypoway,LUSC_hypoway,UCEC_hypoway
chr1:204912205-204950701	1	204912205	204950701	0	0	6	BLCA_hypoway,BRCA_hypoway,LIHC_hypoway,LUAD_hypoway,LUSC_hypoway,UCEC_hypoway
chr1:204960825-205011262	1	204960825	205011262	0	0	8	BLCA_hypoway,COAD_hypoway,ESCA_hypoway,HNSC_hypoway,LIHC_hypoway,LUAD_hypoway,LUSC_hypoway,UCEC_hypoway
chr1:205014729-205054684	1	205014729	205054684	0	0	7	BLCA_hypoway,COAD_hypoway,HNSC_hypoway,LIHC_hypoway,LUAD_hypoway,LUSC_hypoway,UCEC_hypoway
chr1:205199292-205276235	1	205199292	205276235	0	0	3	BLCA_hypoway,BRCA_hypoway,LIHC_hypoway
chr1:205320361-205328358	1	205320361	205328358	1	2	0	BRCA_hyper,LIHC_hypo,LUSC_hypo
chr1:205424971-205425241	1	205424971	205425241	5	0	0	COAD_hyper,ESCA_hyper,HNSC_hyper,LUAD_hyper,LUSC_hyper
chr1:205482923-205536821	1	205482923	205536821	1	0	5	BLCA_hypoway,KIRP_hyper,LIHC_hypoway,LUAD_hypoway,LUSC_hypoway,UCEC_hypoway
chr1:205602863-205648336	1	205602863	205648336	3	0	4	BLCA_hypoway,BRCA_hyper,ESCA_hyper,KIRP_hyper,LUSC_hypoway,PAAD_hypoway,PRAD_hypoway
chr1:205815864-205819609	1	205815864	205819609	1	0	0	UCEC_hyper
chr1:205897158-205919667	1	205897158	205919667	0	0	11	BLCA_hypoway,BRCA_hypoway,COAD_hypoway,ESCA_hypoway,HNSC_hypoway,LIHC_hypoway,LUAD_hypoway,LUSC_hypoway,PAAD_hypoway,PRAD_hypoway,UCEC_hypoway
chr1:206135023-206138190	1	206135023	206138190	1	0	0	COAD_hyper
chr1:206224553-206516628	1	206224553	206516628	0	0	1	LIHC_hypoway
chr1:206941463-206976689	1	206941463	206976689	0	0	4	HNSC_hypoway,KIRC_hypoway,LIHC_hypoway,LUSC_hypoway
chr1:207250783-207277581	1	207250783	207277581	2	0	7	BLCA_hypoway,BRCA_hypoway,COAD_hypoway,HNSC_hypoway,KIRP_hyper,LIHC_hypoway,LUSC_hyper,PRAD_hypoway,UCEC_hypoway
chr1:207669323-207670065	1	207669323	207670065	9	0	0	BLCA_hyper,BRCA_hyper,COAD_hyper,ESCA_hyper,HNSC_hyper,LUAD_hyper,LUSC_hyper,PAAD_hyper,PRAD_hyper
chr1:207817837-207818893	1	207817837	207818893	6	0	0	BRCA_hyper,COAD_hyper,LIHC_hyper,LUAD_hyper,PAAD_hyper,PRAD_hyper
chr1:208083912-208084640	1	208083912	208084640	8	0	0	COAD_hyper,ESCA_hyper,HNSC_hyper,LUAD_hyper,LUSC_hyper,PAAD_hyper,PRAD_hyper,UCEC_hyper
chr1:208217999-208257939	1	208217999	208257939	0	0	4	BRCA_hypoway,LUAD_hypoway,LUSC_hypoway,UCEC_hypoway
chr1:209405770-209408557	1	209405770	209408557	0	5	0	BLCA_hypo,LIHC_hypo,LUAD_hypo,PRAD_hypo,UCEC_hypo
chr1:209602954-209605749	1	209602954	209605749	1	6	0	BLCA_hypo,COAD_hypo,ESCA_hypo,LIHC_hypo,LUSC_hypo,PRAD_hyper,UCEC_hypo
chr1:209822927-209826863	1	209822927	209826863	1	5	0	BLCA_hypo,LUAD_hypo,LUSC_hypo,PAAD_hypo,PRAD_hyper,UCEC_hypo
chr1:209848534-209849445	1	209848534	209849445	3	0	0	ESCA_hyper,HNSC_hyper,LUSC_hyper
chr1:209852360-209876837	1	209852360	209876837	0	0	3	BLCA_hypoway,LIHC_hypoway,PRAD_hypoway
chr1:209928525-209956950	1	209928525	209956950	0	0	5	HNSC_hypoway,KIRC_hypoway,LIHC_hypoway,LUSC_hypoway,UCEC_hypoway
chr1:210110997-210111672	1	210110997	210111672	4	0	0	BRCA_hyper,COAD_hyper,PAAD_hyper,PRAD_hyper
chr1:210855042-210861240	1	210855042	210861240	0	8	0	BLCA_hypo,COAD_hypo,ESCA_hypo,HNSC_hypo,LIHC_hypo,LUAD_hypo,LUSC_hypo,UCEC_hypo
chr1:211666428-211667682	1	211666428	211667682	2	0	0	KIRC_hyper,KIRP_hyper
chr1:212788599-212803761	1	212788599	212803761	0	0	6	BLCA_hypoway,BRCA_hypoway,HNSC_hypoway,LIHC_hypoway,LUSC_hypoway,UCEC_hypoway
chr1:212873962-212874742	1	212873962	212874742	1	0	0	LUSC_hyper
chr1:213124367-213125130	1	213124367	213125130	2	0	0	COAD_hyper,LIHC_hyper
chr1:213559905-213566929	1	213559905	213566929	0	9	0	BLCA_hypo,BRCA_hypo,HNSC_hypo,LIHC_hypo,LUAD_hypo,LUSC_hypo,PAAD_hypo,PRAD_hypo,UCEC_hypo
chr1:214152978-214153645	1	214152978	214153645	9	0	0	BLCA_hyper,BRCA_hyper,COAD_hyper,HNSC_hyper,LIHC_hyper,LUAD_hyper,LUSC_hyper,PRAD_hyper,UCEC_hyper
chr1:214170992-214358938	1	214170992	214358938	0	0	7	BLCA_hypoway,BRCA_hypoway,HNSC_hypoway,LUAD_hypoway,LUSC_hypoway,PRAD_hypoway,UCEC_hypoway
chr1:214522541-214699233	1	214522541	214699233	0	0	1	LIHC_hypoway
chr1:215255109-215256262	1	215255109	215256262	6	0	0	BRCA_hyper,COAD_hyper,LUAD_hyper,LUSC_hyper,PAAD_hyper,UCEC_hyper
chr1:215940808-216419959	1	215940808	216419959	0	0	11	BLCA_hypoway,COAD_hypoway,ESCA_hypoway,HNSC_hypoway,KIRC_hypoway,KIRP_hypoway,LIHC_hypoway,LUAD_hypoway,LUSC_hypoway,PRAD_hypoway,UCEC_hypoway
chr1:216979002-217125704	1	216979002	217125704	1	0	7	BLCA_hypoway,COAD_hypoway,ESCA_hypoway,HNSC_hypoway,LIHC_hypoway,LUAD_hypoway,LUSC_hypoway,UCEC_hyper
chr1:217309793-217312060	1	217309793	217312060	12	0	0	BLCA_hyper,BRCA_hyper,COAD_hyper,ESCA_hyper,HNSC_hyper,KIRC_hyper,KIRP_hyper,LUAD_hyper,LUSC_hyper,PAAD_hyper,PRAD_hyper,UCEC_hyper
chr1:218520089-218520959	1	218520089	218520959	2	0	0	COAD_hyper,LUSC_hyper
chr1:219347020-219347458	1	219347020	219347458	1	0	0	UCEC_hyper
chr1:220101367-220102307	1	220101367	220102307	3	0	0	BRCA_hyper,COAD_hyper,LUAD_hyper
chr1:220448522-220699960	1	220448522	220699960	1	0	5	BLCA_hypoway,KIRC_hypoway,KIRP_hyper,LIHC_hypoway,LUAD_hypoway,LUSC_hypoway
chr1:221050458-221051907	1	221050458	221051907	8	0	0	COAD_hyper,ESCA_hyper,HNSC_hyper,LIHC_hyper,LUAD_hyper,LUSC_hyper,PRAD_hyper,UCEC_hyper
chr1:221057557-221058198	1	221057557	221058198	5	0	0	COAD_hyper,ESCA_hyper,HNSC_hyper,LIHC_hyper,PRAD_hyper
chr1:221060359-221061837	1	221060359	221061837	8	1	0	BRCA_hyper,COAD_hyper,ESCA_hyper,HNSC_hyper,KIRC_hyper,KIRP_hypo,LUAD_hyper,PAAD_hyper,PRAD_hyper
chr1:221064699-221068423	1	221064699	221068423	11	0	0	BLCA_hyper,BRCA_hyper,COAD_hyper,ESCA_hyper,HNSC_hyper,LIHC_hyper,LUAD_hyper,LUSC_hyper,PAAD_hyper,PRAD_hyper,UCEC_hyper
chr1:222340713-222564633	1	222340713	222564633	0	0	7	BLCA_hypoway,BRCA_hypoway,COAD_hypoway,KIRC_hypoway,LIHC_hypoway,LUAD_hypoway,LUSC_hypoway
chr1:223538333-223538957	1	223538333	223538957	3	0	0	LIHC_hyper,LUSC_hyper,PRAD_hyper
chr1:223853144-223889141	1	223853144	223889141	0	0	7	BLCA_hypoway,COAD_hypoway,KIRC_hypoway,KIRP_hypoway,LUAD_hypoway,LUSC_hypoway,PAAD_hypoway
chr1:223936342-223948910	1	223936342	223948910	4	0	1	ESCA_hyper,HNSC_hyper,KIRC_hypoway,KIRP_hyper,LUSC_hyper
chr1:224803762-224805852	1	224803762	224805852	7	0	0	BRCA_hyper,COAD_hyper,ESCA_hyper,HNSC_hyper,LIHC_hyper,LUAD_hyper,PAAD_hyper
chr1:226012346-226036279	1	226012346	226036279	5	0	0	COAD_hyper,ESCA_hyper,KIRP_hyper,LUSC_hyper,PAAD_hyper
chr1:226074407-226077303	1	226074407	226077303	4	1	0	COAD_hyper,HNSC_hypo,KIRC_hyper,KIRP_hyper,LIHC_hyper
chr1:226411032-226411954	1	226411032	226411954	2	0	0	LIHC_hyper,PRAD_hyper
chr1:226841239-226878419	1	226841239	226878419	2	0	1	HNSC_hyper,LIHC_hypoway,LUAD_hyper
chr1:227679598-227729070	1	227679598	227729070	0	0	7	BLCA_hypoway,COAD_hypoway,HNSC_hypoway,LIHC_hypoway,LUAD_hypoway,LUSC_hypoway,PAAD_hypoway
chr1:227747267-227748719	1	227747267	227748719	9	0	0	BLCA_hyper,BRCA_hyper,ESCA_hyper,HNSC_hyper,LUAD_hyper,LUSC_hyper,PAAD_hyper,PRAD_hyper,UCEC_hyper
chr1:227980067-228071452	1	227980067	228071452	0	0	2	LIHC_hypoway,LUSC_hypoway
chr1:228194035-228195794	1	228194035	228195794	3	0	0	COAD_hyper,LUAD_hyper,PAAD_hyper
chr1:228246631-228248237	1	228246631	228248237	7	0	0	BLCA_hyper,BRCA_hyper,ESCA_hyper,LIHC_hyper,LUSC_hyper,PAAD_hyper,PRAD_hyper
chr1:228291667-228295568	1	228291667	228295568	1	0	0	BRCA_hyper
chr1:228336716-228337776	1	228336716	228337776	9	3	0	BLCA_hyper,BRCA_hyper,ESCA_hyper,HNSC_hyper,KIRC_hypo,KIRP_hyper,LIHC_hypo,LUAD_hyper,LUSC_hyper,PAAD_hypo,PRAD_hyper,UCEC_hyper
chr1:228402035-228462316	1	228402035	228462316	0	0	2	BLCA_hypoway,LIHC_hypoway
chr1:228466164-228477767	1	228466164	228477767	0	0	3	BLCA_hypoway,COAD_hypoway,LIHC_hypoway
chr1:228505385-228528979	1	228505385	228528979	0	0	7	BLCA_hypoway,BRCA_hypoway,COAD_hypoway,HNSC_hypoway,LIHC_hypoway,LUAD_hypoway,LUSC_hypoway
chr1:228555183-228559321	1	228555183	228559321	0	8	0	BLCA_hypo,BRCA_hypo,HNSC_hypo,LIHC_hypo,LUAD_hypo,LUSC_hypo,PAAD_hypo,UCEC_hypo
chr1:228603706-228605010	1	228603706	228605010	7	0	0	BRCA_hyper,COAD_hyper,KIRC_hyper,LUAD_hyper,LUSC_hyper,PAAD_hyper,PRAD_hyper
chr1:228607586-228633275	1	228607586	228633275	0	0	3	HNSC_hypoway,LIHC_hypoway,LUSC_hypoway
chr1:228645301-228647248	1	228645301	228647248	4	0	0	KIRC_hyper,LIHC_hyper,LUAD_hyper,LUSC_hyper
chr1:228651707-228653136	1	228651707	228653136	8	0	0	BRCA_hyper,COAD_hyper,ESCA_hyper,HNSC_hyper,LUAD_hyper,LUSC_hyper,PAAD_hyper,PRAD_hyper
chr1:229265502-229299491	1	229265502	229299491	0	0	3	BLCA_hypoway,HNSC_hypoway,LUSC_hypoway
chr1:229567559-229569670	1	229567559	229569670	11	0	0	BLCA_hyper,BRCA_hyper,COAD_hyper,ESCA_hyper,HNSC_hyper,LIHC_hyper,LUAD_hyper,LUSC_hyper,PAAD_hyper,PRAD_hyper,UCEC_hyper
chr1:230458270-230491641	1	230458270	230491641	0	0	6	BLCA_hypoway,BRCA_hypoway,COAD_hypoway,LIHC_hypoway,LUSC_hypoway,UCEC_hypoway
chr1:230496610-230514361	1	230496610	230514361	0	0	3	BLCA_hypoway,BRCA_hypoway,LIHC_hypoway
chr1:230882386-230883182	1	230882386	230883182	0	3	0	BLCA_hypo,PAAD_hypo,UCEC_hypo
chr1:231155448-231157174	1	231155448	231157174	0	2	0	BRCA_hypo,LIHC_hypo
chr1:231298176-231299396	1	231298176	231299396	5	0	0	BRCA_hyper,COAD_hyper,HNSC_hyper,LUAD_hyper,PAAD_hyper
chr1:231991714-232181623	1	231991714	232181623	0	0	4	BLCA_hypoway,HNSC_hypoway,LIHC_hypoway,LUSC_hypoway
chr1:232621925-232684368	1	232621925	232684368	0	0	3	BLCA_hypoway,LIHC_hypoway,LUSC_hypoway
chr1:232940989-232941775	1	232940989	232941775	3	0	0	HNSC_hyper,PRAD_hyper,UCEC_hyper
chr1:232944624-233085209	1	232944624	233085209	0	0	4	BLCA_hypoway,KIRC_hypoway,LIHC_hypoway,LUSC_hypoway
chr1:233119295-233394797	1	233119295	233394797	0	0	1	LIHC_hypoway
chr1:234040044-234041456	1	234040044	234041456	4	0	0	BLCA_hyper,BRCA_hyper,COAD_hyper,LUSC_hyper
chr1:234667086-234669825	1	234667086	234669825	9	0	0	BRCA_hyper,ESCA_hyper,HNSC_hyper,KIRC_hyper,KIRP_hyper,LIHC_hyper,LUAD_hyper,PAAD_hyper,PRAD_hyper
chr1:235048761-235099089	1	235048761	235099089	4	0	1	BRCA_hyper,ESCA_hyper,KIRP_hyper,LUSC_hyper,UCEC_hypoway
chr1:235805402-235809672	1	235805402	235809672	0	7	0	BLCA_hypo,COAD_hypo,ESCA_hypo,HNSC_hypo,LUSC_hypo,PAAD_hypo,UCEC_hypo
chr1:235813838-235814462	1	235813838	235814462	7	0	0	BLCA_hyper,BRCA_hyper,ESCA_hyper,HNSC_hyper,LUAD_hyper,LUSC_hyper,PRAD_hyper
chr1:236154200-236176807	1	236154200	236176807	0	0	3	BRCA_hypoway,LUSC_hypoway,UCEC_hypoway
chr1:236227520-236228755	1	236227520	236228755	7	0	0	BRCA_hyper,COAD_hyper,ESCA_hyper,LUAD_hyper,LUSC_hyper,PAAD_hyper,PRAD_hyper
chr1:236558464-236559463	1	236558464	236559463	2	0	0	COAD_hyper,PAAD_hyper
chr1:236853955-236918537	1	236853955	236918537	0	0	7	BLCA_hypoway,BRCA_hypoway,HNSC_hypoway,LIHC_hypoway,LUAD_hypoway,LUSC_hypoway,UCEC_hypoway
chr1:237116051-237201508	1	237116051	237201508	0	0	8	BLCA_hypoway,BRCA_hypoway,ESCA_hypoway,HNSC_hypoway,LIHC_hypoway,LUAD_hypoway,LUSC_hypoway,UCEC_hypoway
chr1:237205173-237206643	1	237205173	237206643	10	0	0	BLCA_hyper,BRCA_hyper,COAD_hyper,ESCA_hyper,HNSC_hyper,LIHC_hyper,LUAD_hyper,LUSC_hyper,PAAD_hyper,UCEC_hyper
chr1:237977008-238226289	1	237977008	238226289	0	0	9	BLCA_hypoway,BRCA_hypoway,COAD_hypoway,HNSC_hypoway,LIHC_hypoway,LUAD_hypoway,LUSC_hypoway,PRAD_hypoway,UCEC_hypoway
chr1:239549576-239549853	1	239549576	239549853	2	0	0	HNSC_hyper,LUSC_hyper
chr1:239699219-240072501	1	239699219	240072501	0	0	6	BLCA_hypoway,BRCA_hypoway,HNSC_hypoway,LIHC_hypoway,LUAD_hypoway,UCEC_hypoway
chr1:240254959-240257185	1	240254959	240257185	8	0	0	BLCA_hyper,BRCA_hyper,COAD_hyper,ESCA_hyper,HNSC_hyper,LUAD_hyper,LUSC_hyper,PAAD_hyper
chr1:240368440-240587072	1	240368440	240587072	0	0	12	BLCA_hypoway,BRCA_hypoway,COAD_hypoway,ESCA_hypoway,HNSC_hypoway,KIRC_hypoway,KIRP_hypoway,LIHC_hypoway,LUAD_hypoway,LUSC_hypoway,PRAD_hypoway,UCEC_hypoway
chr1:240656216-240656737	1	240656216	240656737	1	0	0	UCEC_hyper
chr1:240986511-241032479	1	240986511	241032479	0	0	9	BLCA_hypoway,BRCA_hypoway,ESCA_hypoway,HNSC_hypoway,LIHC_hypoway,LUAD_hypoway,LUSC_hypoway,PRAD_hypoway,UCEC_hypoway
chr1:241519651-241520941	1	241519651	241520941	3	0	0	BRCA_hyper,HNSC_hyper,PRAD_hyper
chr1:241804035-241912768	1	241804035	241912768	1	0	7	BLCA_hypoway,BRCA_hypoway,ESCA_hypoway,KIRP_hyper,LIHC_hypoway,LUAD_hypoway,LUSC_hypoway,UCEC_hypoway
chr1:242222867-242407965	1	242222867	242407965	0	0	7	BLCA_hypoway,BRCA_hypoway,COAD_hypoway,HNSC_hypoway,LIHC_hypoway,LUSC_hypoway,UCEC_hypoway
chr1:242686708-242688681	1	242686708	242688681	5	0	0	BRCA_hyper,COAD_hyper,HNSC_hyper,LUAD_hyper,PAAD_hyper
chr1:243138526-243288625	1	243138526	243288625	0	0	3	BLCA_hypoway,LIHC_hypoway,PRAD_hypoway
chr1:243646234-243646787	1	243646234	243646787	9	0	0	BLCA_hyper,COAD_hyper,ESCA_hyper,HNSC_hyper,KIRC_hyper,KIRP_hyper,LUAD_hyper,LUSC_hyper,UCEC_hyper
chr1:243670223-244011194	1	243670223	244011194	0	0	6	BLCA_hypoway,COAD_hypoway,HNSC_hypoway,LIHC_hypoway,LUSC_hypoway,UCEC_hypoway
chr1:244080113-244081189	1	244080113	244081189	4	0	0	BRCA_hyper,COAD_hyper,LUAD_hyper,PAAD_hyper
chr1:244213357-244214679	1	244213357	244214679	3	0	0	ESCA_hyper,HNSC_hyper,LUSC_hyper
chr1:244226142-244534647	1	244226142	244534647	3	0	7	BLCA_hypoway,ESCA_hypoway,HNSC_hypoway,KIRC_hyper,KIRP_hyper,LIHC_hypoway,LUSC_hypoway,PAAD_hypoway,PRAD_hyper,UCEC_hypoway
chr1:245223498-245257993	1	245223498	245257993	0	0	5	BLCA_hypoway,BRCA_hypoway,ESCA_hypoway,LUAD_hypoway,LUSC_hypoway
chr1:245525120-245541456	1	245525120	245541456	0	0	4	BLCA_hypoway,BRCA_hypoway,LIHC_hypoway,LUSC_hypoway
chr1:245737865-245744769	1	245737865	245744769	0	2	0	LIHC_hypo,LUSC_hypo
chr1:245840667-245849662	1	245840667	245849662	0	4	0	BLCA_hypo,BRCA_hypo,LIHC_hypo,LUSC_hypo
chr1:245853937-245986694	1	245853937	245986694	0	0	4	BLCA_hypoway,ESCA_hypoway,LIHC_hypoway,LUSC_hypoway
chr1:247171233-247171572	1	247171233	247171572	1	0	0	PAAD_hyper
chr1:247418073-247493476	1	247418073	247493476	0	0	1	LIHC_hypoway
chr1:247511399-247537369	1	247511399	247537369	6	0	0	COAD_hyper,LUAD_hyper,LUSC_hyper,PAAD_hyper,PRAD_hyper,UCEC_hyper
chr1:247542118-247588074	1	247542118	247588074	0	0	9	BLCA_hypoway,BRCA_hypoway,ESCA_hypoway,HNSC_hypoway,KIRC_hypoway,LIHC_hypoway,LUAD_hypoway,LUSC_hypoway,UCEC_hypoway
chr1:247616522-247679988	1	247616522	247679988	0	0	9	BLCA_hypoway,BRCA_hypoway,COAD_hypoway,ESCA_hypoway,HNSC_hypoway,LIHC_hypoway,LUAD_hypoway,LUSC_hypoway,UCEC_hypoway
chr1:247681438-247694406	1	247681438	247694406	10	0	0	BLCA_hyper,BRCA_hyper,COAD_hyper,ESCA_hyper,HNSC_hyper,LUAD_hyper,LUSC_hyper,PAAD_hyper,PRAD_hyper,UCEC_hyper
chr1:247695327-247737746	1	247695327	247737746	0	0	11	BLCA_hypoway,BRCA_hypoway,COAD_hypoway,ESCA_hypoway,HNSC_hypoway,KIRC_hypoway,KIRP_hypoway,LIHC_hypoway,LUAD_hypoway,LUSC_hypoway,UCEC_hypoway
chr1:247803687-248019234	1	247803687	248019234	0	0	12	BLCA_hypoway,BRCA_hypoway,COAD_hypoway,ESCA_hypoway,HNSC_hypoway,KIRC_hypoway,KIRP_hypoway,LIHC_hypoway,LUAD_hypoway,LUSC_hypoway,PRAD_hypoway,UCEC_hypoway
chr1:248020349-248021091	1	248020349	248021091	8	0	0	BLCA_hyper,ESCA_hyper,HNSC_hyper,LIHC_hyper,LUAD_hyper,LUSC_hyper,PAAD_hyper,UCEC_hyper
chr1:248083145-248099880	1	248083145	248099880	0	0	8	BLCA_hypoway,COAD_hypoway,ESCA_hypoway,HNSC_hypoway,LIHC_hypoway,LUAD_hypoway,LUSC_hypoway,UCEC_hypoway
chr1:248100406-248100614	1	248100406	248100614	7	0	0	BLCA_hyper,BRCA_hyper,COAD_hyper,ESCA_hyper,LUSC_hyper,PAAD_hyper,UCEC_hyper
chr1:248112136-248286029	1	248112136	248286029	0	0	10	BLCA_hypoway,BRCA_hypoway,COAD_hypoway,ESCA_hypoway,HNSC_hypoway,LIHC_hypoway,LUAD_hypoway,LUSC_hypoway,PRAD_hypoway,UCEC_hypoway
chr1:248308216-248487167	1	248308216	248487167	0	0	10	BLCA_hypoway,BRCA_hypoway,COAD_hypoway,ESCA_hypoway,HNSC_hypoway,LIHC_hypoway,LUAD_hypoway,LUSC_hypoway,PRAD_hypoway,UCEC_hypoway
chr1:248856576-248903325	1	248856576	248903325	0	0	8	BLCA_hypoway,BRCA_hypoway,ESCA_hypoway,HNSC_hypoway,LIHC_hypoway,LUAD_hypoway,LUSC_hypoway,UCEC_hypoway
chr10:91801-94773	10	91801	94773	0	4	0	BLCA_hypo,HNSC_hypo,LIHC_hypo,LUSC_hypo
chr10:373956-390328	10	373956	390328	0	0	2	LIHC_hypoway,UCEC_hypoway
chr10:407934-432066	10	407934	432066	0	0	1	LIHC_hypoway
chr10:601782-612391	10	601782	612391	1	0	2	KIRC_hypoway,KIRP_hyper,LUSC_hypoway
chr10:631303-653567	10	631303	653567	0	0	2	HNSC_hypoway,LUSC_hypoway
chr10:671627-677369	10	671627	677369	0	3	0	KIRC_hypo,LUSC_hypo,UCEC_hypo
chr10:695843-696356	10	695843	696356	3	0	0	BRCA_hyper,ESCA_hyper,LUSC_hyper
chr10:708424-710082	10	708424	710082	1	1	0	BRCA_hyper,LUSC_hypo
chr10:726821-729956	10	726821	729956	0	8	0	ESCA_hypo,HNSC_hypo,KIRC_hypo,KIRP_hypo,LIHC_hypo,LUAD_hypo,LUSC_hypo,PAAD_hypo
chr10:743760-820027	10	743760	820027	0	0	8	BLCA_hypoway,COAD_hypoway,ESCA_hypoway,HNSC_hypoway,LIHC_hypoway,LUAD_hypoway,LUSC_hypoway,UCEC_hypoway
chr10:980764-1019787	10	980764	1019787	0	0	3	BLCA_hypoway,LIHC_hypoway,LUSC_hypoway
chr10:1166781-1167786	10	1166781	1167786	2	0	0	KIRC_hyper,KIRP_hyper
chr10:1202349-1222504	10	1202349	1222504	0	0	9	BLCA_hypoway,BRCA_hypoway,COAD_hypoway,ESCA_hypoway,HNSC_hypoway,LIHC_hypoway,LUAD_hypoway,LUSC_hypoway,UCEC_hypoway
chr10:1245480-1247560	10	1245480	1247560	0	8	0	BLCA_hypo,COAD_hypo,ESCA_hypo,HNSC_hypo,LIHC_hypo,LUAD_hypo,LUSC_hypo,UCEC_hypo
chr10:1251073-1263207	10	1251073	1263207	0	0	8	BLCA_hypoway,COAD_hypoway,ESCA_hypoway,HNSC_hypoway,LIHC_hypoway,LUAD_hypoway,LUSC_hypoway,UCEC_hypoway
chr10:1444585-1453818	10	1444585	1453818	0	9	0	BLCA_hypo,BRCA_hypo,COAD_hypo,ESCA_hypo,HNSC_hypo,LIHC_hypo,LUAD_hypo,LUSC_hypo,UCEC_hypo
chr10:1491206-1511277	10	1491206	1511277	1	0	7	BLCA_hypoway,COAD_hypoway,ESCA_hypoway,LIHC_hypoway,LUAD_hypoway,LUSC_hypoway,PRAD_hyper,UCEC_hypoway
chr10:1558807-1565114	10	1558807	1565114	0	7	0	BLCA_hypo,COAD_hypo,HNSC_hypo,LIHC_hypo,LUAD_hypo,LUSC_hypo,UCEC_hypo
chr10:1713334-1749547	10	1713334	1749547	0	0	9	BLCA_hypoway,BRCA_hypoway,COAD_hypoway,ESCA_hypoway,HNSC_hypoway,LIHC_hypoway,LUAD_hypoway,LUSC_hypoway,UCEC_hypoway
chr10:1778843-1780003	10	1778843	1780003	5	0	0	BRCA_hyper,COAD_hyper,LUAD_hyper,PAAD_hyper,UCEC_hyper
chr10:1827838-1889970	10	1827838	1889970	0	0	5	BLCA_hypoway,BRCA_hypoway,LIHC_hypoway,LUSC_hypoway,UCEC_hypoway
chr10:1995013-2359922	10	1995013	2359922	0	0	10	BLCA_hypoway,BRCA_hypoway,COAD_hypoway,ESCA_hypoway,HNSC_hypoway,LIHC_hypoway,LUAD_hypoway,LUSC_hypoway,PRAD_hypoway,UCEC_hypoway
chr10:2561041-2567883	10	2561041	2567883	0	1	0	LUAD_hypo
chr10:2992149-3063296	10	2992149	3063296	0	0	8	BLCA_hypoway,BRCA_hypoway,ESCA_hypoway,HNSC_hypoway,LIHC_hypoway,LUAD_hypoway,LUSC_hypoway,UCEC_hypoway
chr10:3116791-3146549	10	3116791	3146549	0	0	2	KIRC_hypoway,LIHC_hypoway
chr10:3329764-3343191	10	3329764	3343191	2	0	8	BLCA_hypoway,ESCA_hypoway,HNSC_hypoway,KIRC_hyper,KIRP_hyper,LIHC_hypoway,LUAD_hypoway,LUSC_hypoway,PRAD_hypoway,UCEC_hypoway
chr10:3360946-3374366	10	3360946	3374366	0	0	1	LIHC_hypoway
chr10:3536340-3537285	10	3536340	3537285	1	2	0	HNSC_hypo,LIHC_hypo,UCEC_hyper
chr10:3572201-3596838	10	3572201	3596838	0	0	2	LIHC_hypoway,UCEC_hypoway
chr10:3600709-3761802	10	3600709	3761802	0	0	7	BLCA_hypoway,COAD_hypoway,HNSC_hypoway,LIHC_hypoway,LUAD_hypoway,LUSC_hypoway,UCEC_hypoway
chr10:4230412-4312184	10	4230412	4312184	0	0	7	BLCA_hypoway,BRCA_hypoway,HNSC_hypoway,LIHC_hypoway,LUAD_hypoway,LUSC_hypoway,UCEC_hypoway
chr10:4868327-4868690	10	4868327	4868690	4	0	0	LIHC_hyper,LUAD_hyper,LUSC_hyper,PRAD_hyper
chr10:5406422-5407119	10	5406422	5407119	2	2	0	LIHC_hypo,LUSC_hyper,PRAD_hyper,UCEC_hypo
chr10:5519307-5542615	10	5519307	5542615	0	0	3	BLCA_hypoway,LIHC_hypoway,LUSC_hypoway
chr10:5566542-5567524	10	5566542	5567524	4	3	0	BLCA_hypo,BRCA_hyper,ESCA_hypo,KIRC_hyper,KIRP_hyper,LUSC_hypo,PRAD_hyper
chr10:6178318-6186015	10	6178318	6186015	0	5	0	BLCA_hypo,BRCA_hypo,LUAD_hypo,LUSC_hypo,UCEC_hypo
chr10:6220878-6233774	10	6220878	6233774	2	0	0	KIRC_hyper,KIRP_hyper
chr10:6264089-6275077	10	6264089	6275077	2	0	1	BRCA_hyper,KIRP_hyper,LIHC_hypoway
chr10:6531367-6569373	10	6531367	6569373	0	0	2	BLCA_hypoway,UCEC_hypoway
chr10:6691514-6821184	10	6691514	6821184	0	0	9	BLCA_hypoway,BRCA_hypoway,COAD_hypoway,ESCA_hypoway,LIHC_hypoway,LUAD_hypoway,LUSC_hypoway,PRAD_hypoway,UCEC_hypoway
chr10:7138973-7216145	10	7138973	7216145	0	0	9	BLCA_hypoway,BRCA_hypoway,COAD_hypoway,ESCA_hypoway,HNSC_hypoway,LIHC_hypoway,LUAD_hypoway,LUSC_hypoway,UCEC_hypoway
chr10:7407423-7412942	10	7407423	7412942	0	3	0	LIHC_hypo,LUSC_hypo,UCEC_hypo
chr10:7449664-7452950	10	7449664	7452950	5	0	0	COAD_hyper,LUAD_hyper,LUSC_hyper,PAAD_hyper,UCEC_hyper
chr10:7564400-7574782	10	7564400	7574782	0	0	10	BLCA_hypoway,BRCA_hypoway,COAD_hypoway,ESCA_hypoway,HNSC_hypoway,LIHC_hypoway,LUAD_hypoway,LUSC_hypoway,PRAD_hypoway,UCEC_hypoway
chr10:7617636-7641548	10	7617636	7641548	0	0	8	BLCA_hypoway,BRCA_hypoway,ESCA_hypoway,HNSC_hypoway,LIHC_hypoway,LUAD_hypoway,LUSC_hypoway,UCEC_hypoway
chr10:7708278-7710179	10	7708278	7710179	6	0	0	BRCA_hyper,COAD_hyper,HNSC_hyper,LUAD_hyper,LUSC_hyper,PAAD_hyper
chr10:8076276-8078357	10	8076276	8078357	11	0	0	BLCA_hyper,BRCA_hyper,COAD_hyper,ESCA_hyper,HNSC_hyper,LIHC_hyper,LUAD_hyper,LUSC_hyper,PAAD_hyper,PRAD_hyper,UCEC_hyper
chr10:8093238-8094679	10	8093238	8094679	9	0	0	COAD_hyper,ESCA_hyper,HNSC_hyper,KIRC_hyper,LIHC_hyper,LUAD_hyper,LUSC_hyper,PAAD_hyper,PRAD_hyper
chr10:8095650-8095831	10	8095650	8095831	2	0	0	LUAD_hyper,PAAD_hyper
chr10:8097182-8098005	10	8097182	8098005	8	2	0	BLCA_hypo,BRCA_hypo,COAD_hyper,ESCA_hyper,HNSC_hyper,LUAD_hyper,LUSC_hyper,PAAD_hyper,PRAD_hyper,UCEC_hyper
chr10:8203260-8302831	10	8203260	8302831	0	0	4	HNSC_hypoway,LIHC_hypoway,LUAD_hypoway,LUSC_hypoway
chr10:9448973-9646929	10	9448973	9646929	0	0	6	BLCA_hypoway,BRCA_hypoway,HNSC_hypoway,LIHC_hypoway,LUSC_hypoway,UCEC_hypoway
chr10:10518252-10995060	10	10518252	10995060	0	0	11	BLCA_hypoway,BRCA_hypoway,COAD_hypoway,ESCA_hypoway,HNSC_hypoway,KIRC_hypoway,LIHC_hypoway,LUAD_hypoway,LUSC_hypoway,PRAD_hypoway,UCEC_hypoway
chr10:11047270-11047586	10	11047270	11047586	0	4	0	BLCA_hypo,BRCA_hypo,LIHC_hypo,UCEC_hypo
chr10:11059576-11060104	10	11059576	11060104	3	0	0	BRCA_hyper,LIHC_hyper,PAAD_hyper
chr10:11069297-11206221	10	11069297	11206221	0	0	9	BLCA_hypoway,BRCA_hypoway,ESCA_hypoway,HNSC_hypoway,KIRC_hypoway,LIHC_hypoway,LUSC_hypoway,PRAD_hypoway,UCEC_hypoway
chr10:11206771-11207527	10	11206771	11207527	3	1	0	BRCA_hyper,LUSC_hypo,PAAD_hyper,PRAD_hyper
chr10:11547854-11650681	10	11547854	11650681	0	0	1	LUSC_hypoway
chr10:11911448-11912597	10	11911448	11912597	6	0	0	BLCA_hyper,BRCA_hyper,KIRC_hyper,KIRP_hyper,PRAD_hyper,UCEC_hyper
chr10:12866511-12875100	10	12866511	12875100	0	4	0	BLCA_hypo,BRCA_hypo,PRAD_hypo,UCEC_hypo
chr10:13043312-13043986	10	13043312	13043986	2	0	0	PAAD_hyper,PRAD_hyper
chr10:13089771-13139217	10	13089771	13139217	0	0	2	BLCA_hypoway,COAD_hypoway
chr10:13510335-13516746	10	13510335	13516746	0	2	0	HNSC_hypo,LUSC_hypo
chr10:13836756-13931592	10	13836756	13931592	1	0	6	BLCA_hypoway,HNSC_hypoway,KIRP_hyper,LUAD_hypoway,LUSC_hypoway,PAAD_hypoway,UCEC_hypoway
chr10:13933246-13934438	10	13933246	13934438	5	0	0	BRCA_hyper,COAD_hyper,LUAD_hyper,PAAD_hyper,PRAD_hyper
chr10:14051635-14052028	10	14051635	14052028	5	1	0	BRCA_hyper,ESCA_hypo,KIRC_hyper,KIRP_hyper,LUAD_hyper,PRAD_hyper
chr10:14405678-14520388	10	14405678	14520388	0	0	8	BLCA_hypoway,COAD_hypoway,ESCA_hypoway,HNSC_hypoway,LIHC_hypoway,LUSC_hypoway,PAAD_hypoway,UCEC_hypoway
chr10:14816200-14816973	10	14816200	14816973	0	9	0	BLCA_hypo,BRCA_hypo,HNSC_hypo,KIRC_hypo,KIRP_hypo,LIHC_hypo,LUAD_hypo,LUSC_hypo,UCEC_hypo
chr10:15255054-15258375	10	15255054	15258375	0	5	0	BLCA_hypo,BRCA_hypo,HNSC_hypo,LUAD_hypo,LUSC_hypo
chr10:15760946-15762091	10	15760946	15762091	9	0	0	BLCA_hyper,BRCA_hyper,COAD_hyper,ESCA_hyper,HNSC_hyper,LUAD_hyper,LUSC_hyper,PAAD_hyper,UCEC_hyper
chr10:16561392-16563821	10	16561392	16563821	9	0	0	BLCA_hyper,BRCA_hyper,COAD_hyper,HNSC_hyper,KIRC_hyper,KIRP_hyper,LIHC_hyper,LUAD_hyper,UCEC_hyper
chr10:16634962-16822712	10	16634962	16822712	0	0	1	LUSC_hypoway
chr10:16898310-17188594	10	16898310	17188594	0	0	9	BLCA_hypoway,BRCA_hypoway,COAD_hypoway,HNSC_hypoway,KIRC_hypoway,LIHC_hypoway,LUAD_hypoway,LUSC_hypoway,UCEC_hypoway
chr10:17271005-17271994	10	17271005	17271994	6	0	0	BLCA_hyper,BRCA_hyper,COAD_hyper,LIHC_hyper,PAAD_hyper,PRAD_hyper
chr10:17495809-17496720	10	17495809	17496720	2	0	0	LUAD_hyper,PAAD_hyper
chr10:18240315-18348426	10	18240315	18348426	0	0	7	BLCA_hypoway,COAD_hypoway,HNSC_hypoway,LIHC_hypoway,LUAD_hypoway,LUSC_hypoway,UCEC_hypoway
chr10:18429036-18430144	10	18429036	18430144	4	0	0	HNSC_hyper,LUAD_hyper,LUSC_hyper,PAAD_hyper
chr10:18549377-18550223	10	18549377	18550223	1	3	0	BLCA_hypo,LUSC_hypo,PRAD_hyper,UCEC_hypo
chr10:18622964-18629677	10	18622964	18629677	1	1	0	LIHC_hypo,PRAD_hyper
chr10:19972178-20072678	10	19972178	20072678	0	0	1	LUSC_hypoway
chr10:20104332-20106873	10	20104332	20106873	2	0	0	LUAD_hyper,PAAD_hyper
chr10:21187441-21450066	10	21187441	21450066	0	0	5	BLCA_hypoway,ESCA_hypoway,HNSC_hypoway,LIHC_hypoway,UCEC_hypoway
chr10:21787595-21798341	10	21787595	21798341	1	0	1	KIRP_hyper,UCEC_hypoway
chr10:22540645-22542444	10	22540645	22542444	7	0	0	COAD_hyper,HNSC_hyper,LIHC_hyper,LUAD_hyper,LUSC_hyper,PRAD_hyper,UCEC_hyper
chr10:22615539-22622123	10	22615539	22622123	0	3	0	KIRP_hypo,LIHC_hypo,PRAD_hypo
chr10:22622792-22624374	10	22622792	22624374	13	0	0	BLCA_hyper,BRCA_hyper,COAD_hyper,ESCA_hyper,HNSC_hyper,KIRC_hyper,KIRP_hyper,LIHC_hyper,LUAD_hyper,LUSC_hyper,PAAD_hyper,PRAD_hyper,UCEC_hyper
chr10:22633915-22634733	10	22633915	22634733	11	0	0	BLCA_hyper,BRCA_hyper,COAD_hyper,ESCA_hyper,HNSC_hyper,LIHC_hyper,LUAD_hyper,LUSC_hyper,PAAD_hyper,PRAD_hyper,UCEC_hyper
chr10:22764565-22766861	10	22764565	22766861	10	0	0	BLCA_hyper,COAD_hyper,ESCA_hyper,HNSC_hyper,LIHC_hyper,LUAD_hyper,LUSC_hyper,PAAD_hyper,PRAD_hyper,UCEC_hyper
chr10:23216694-23217173	10	23216694	23217173	1	1	0	COAD_hyper,UCEC_hypo
chr10:23463014-23464043	10	23463014	23464043	11	0	0	BLCA_hyper,BRCA_hyper,COAD_hyper,ESCA_hyper,HNSC_hyper,LIHC_hyper,LUAD_hyper,LUSC_hyper,PAAD_hyper,PRAD_hyper,UCEC_hyper
chr10:23479992-23480803	10	23479992	23480803	9	0	0	BLCA_hyper,BRCA_hyper,COAD_hyper,ESCA_hyper,HNSC_hyper,LUAD_hyper,LUSC_hyper,PRAD_hyper,UCEC_hyper
chr10:23482254-23489850	10	23482254	23489850	10	0	0	BLCA_hyper,BRCA_hyper,COAD_hyper,ESCA_hyper,HNSC_hyper,LUAD_hyper,LUSC_hyper,PAAD_hyper,PRAD_hyper,UCEC_hyper
chr10:23982349-23984977	10	23982349	23984977	9	0	0	BLCA_hyper,BRCA_hyper,COAD_hyper,HNSC_hyper,LUAD_hyper,LUSC_hyper,PAAD_hyper,PRAD_hyper,UCEC_hyper
chr10:25465170-25465503	10	25465170	25465503	9	0	0	BLCA_hyper,BRCA_hyper,COAD_hyper,HNSC_hyper,LUAD_hyper,LUSC_hyper,PAAD_hyper,PRAD_hyper,UCEC_hyper
chr10:26504258-26506933	10	26504258	26506933	10	0	0	BLCA_hyper,BRCA_hyper,COAD_hyper,ESCA_hyper,HNSC_hyper,LUAD_hyper,LUSC_hyper,PAAD_hyper,PRAD_hyper,UCEC_hyper
chr10:26727068-26728036	10	26727068	26728036	2	0	0	COAD_hyper,UCEC_hyper
chr10:26846019-26856454	10	26846019	26856454	5	0	0	HNSC_hyper,KIRC_hyper,KIRP_hyper,LUAD_hyper,UCEC_hyper
chr10:26856663-26883165	10	26856663	26883165	0	0	8	BLCA_hypoway,BRCA_hypoway,HNSC_hypoway,LIHC_hypoway,LUAD_hypoway,LUSC_hypoway,PRAD_hypoway,UCEC_hypoway
chr10:27827129-28011765	10	27827129	28011765	0	0	2	HNSC_hypoway,LIHC_hypoway
chr10:28287542-28288192	10	28287542	28288192	2	0	0	COAD_hyper,PAAD_hyper
chr10:28342665-28571848	10	28342665	28571848	0	0	1	LIHC_hypoway
chr10:28616725-28759936	10	28616725	28759936	0	0	2	BLCA_hypoway,ESCA_hypoway
chr10:29395075-29516555	10	29395075	29516555	0	0	7	BLCA_hypoway,BRCA_hypoway,HNSC_hypoway,LIHC_hypoway,LUAD_hypoway,LUSC_hypoway,UCEC_hypoway
chr10:30317624-30336870	10	30317624	30336870	0	0	1	LIHC_hypoway
chr10:30723891-30726531	10	30723891	30726531	2	1	0	LIHC_hypo,LUSC_hyper,PRAD_hyper
chr10:30915917-31065098	10	30915917	31065098	0	0	7	BLCA_hypoway,COAD_hypoway,HNSC_hypoway,LIHC_hypoway,LUAD_hypoway,LUSC_hypoway,UCEC_hypoway
chr10:31322130-31410359	10	31322130	31410359	0	0	3	LIHC_hypoway,LUAD_hypoway,LUSC_hypoway
chr10:31609881-31610093	10	31609881	31610093	3	0	0	BRCA_hyper,COAD_hyper,LUAD_hyper
chr10:32218900-32341127	10	32218900	32341127	0	0	1	LIHC_hypoway
chr10:33321729-33432514	10	33321729	33432514	0	0	5	BLCA_hypoway,COAD_hypoway,HNSC_hypoway,LUSC_hypoway,UCEC_hypoway
chr10:34609537-34887546	10	34609537	34887546	0	0	1	LUSC_hypoway
chr10:35080180-35102505	10	35080180	35102505	2	0	1	LUSC_hypoway,PRAD_hyper,UCEC_hyper
chr10:35107897-35207290	10	35107897	35207290	2	0	3	BLCA_hypoway,KIRC_hyper,KIRP_hyper,LIHC_hypoway,LUSC_hypoway
chr10:35502687-35536010	10	35502687	35536010	0	0	3	BLCA_hypoway,HNSC_hypoway,LUSC_hypoway
chr10:35883603-35894430	10	35883603	35894430	1	0	6	BLCA_hypoway,BRCA_hypoway,HNSC_hypoway,LIHC_hypoway,LUSC_hypoway,PRAD_hyper,UCEC_hypoway
chr10:38738646-39024195	10	38738646	39024195	0	0	9	BLCA_hypoway,BRCA_hypoway,ESCA_hypoway,HNSC_hypoway,LIHC_hypoway,LUAD_hypoway,LUSC_hypoway,PRAD_hypoway,UCEC_hypoway
chr10:42862977-42863594	10	42862977	42863594	2	0	0	COAD_hyper,UCEC_hyper
chr10:43251950-43263649	10	43251950	43263649	0	0	5	BLCA_hypoway,LIHC_hypoway,LUAD_hypoway,LUSC_hypoway,UCEC_hypoway
chr10:43428470-43429459	10	43428470	43429459	3	0	0	LUSC_hyper,PAAD_hyper,PRAD_hyper
chr10:43572064-43573319	10	43572064	43573319	1	0	0	PAAD_hyper
chr10:43601915-43632601	10	43601915	43632601	0	0	5	BLCA_hypoway,COAD_hypoway,HNSC_hypoway,LIHC_hypoway,LUSC_hypoway
chr10:43700651-43723859	10	43700651	43723859	0	0	5	BLCA_hypoway,COAD_hypoway,HNSC_hypoway,LIHC_hypoway,LUSC_hypoway
chr10:43724741-43763042	10	43724741	43763042	1	0	0	COAD_hyper
chr10:43834362-43844651	10	43834362	43844651	0	0	1	LUSC_hypoway
chr10:43861768-43871590	10	43861768	43871590	2	7	0	BLCA_hypo,HNSC_hypo,KIRC_hyper,KIRP_hyper,LIHC_hypo,LUAD_hypo,LUSC_hypo,PAAD_hypo,UCEC_hypo
chr10:43889108-43892956	10	43889108	43892956	2	0	0	HNSC_hyper,LUSC_hyper
chr10:44185096-44186174	10	44185096	44186174	2	0	0	COAD_hyper,HNSC_hyper
chr10:44224458-44339107	10	44224458	44339107	0	0	8	BLCA_hypoway,ESCA_hypoway,HNSC_hypoway,LIHC_hypoway,LUAD_hypoway,LUSC_hypoway,PRAD_hypoway,UCEC_hypoway
chr10:44670009-44702818	10	44670009	44702818	0	0	6	BLCA_hypoway,HNSC_hypoway,LUAD_hypoway,LUSC_hypoway,PRAD_hypoway,UCEC_hypoway
chr10:44830586-44876162	10	44830586	44876162	1	0	7	BLCA_hypoway,COAD_hypoway,HNSC_hypoway,KIRP_hyper,LIHC_hypoway,LUAD_hypoway,LUSC_hypoway,UCEC_hypoway
chr10:44880127-44880562	10	44880127	44880562	3	0	0	HNSC_hyper,LUAD_hyper,LUSC_hyper
chr10:44910228-45270290	10	44910228	45270290	1	0	8	BLCA_hypoway,HNSC_hypoway,KIRC_hypoway,KIRP_hyper,LIHC_hypoway,LUAD_hypoway,LUSC_hypoway,PAAD_hypoway,UCEC_hypoway
chr10:45604780-45650280	10	45604780	45650280	0	0	6	BLCA_hypoway,COAD_hypoway,HNSC_hypoway,LUAD_hypoway,LUSC_hypoway,UCEC_hypoway
chr10:45701073-45719956	10	45701073	45719956	0	0	3	HNSC_hypoway,LIHC_hypoway,LUSC_hypoway
chr10:45920484-45923705	10	45920484	45923705	7	0	0	BLCA_hyper,KIRC_hyper,KIRP_hyper,LUAD_hyper,LUSC_hyper,PRAD_hyper,UCEC_hyper
chr10:46970181-46971347	10	46970181	46971347	4	0	0	COAD_hyper,LUAD_hyper,LUSC_hyper,UCEC_hyper
chr10:47083282-47083632	10	47083282	47083632	4	0	0	BRCA_hyper,COAD_hyper,LUAD_hyper,PRAD_hyper
chr10:47128418-47135256	10	47128418	47135256	0	4	0	BRCA_hypo,LIHC_hypo,LUSC_hypo,UCEC_hypo
chr10:47151932-47599596	10	47151932	47599596	0	0	4	BLCA_hypoway,COAD_hypoway,HNSC_hypoway,LUSC_hypoway
chr10:47658412-47768476	10	47658412	47768476	0	0	4	BLCA_hypoway,LIHC_hypoway,LUSC_hypoway,PAAD_hypoway
chr10:48416780-48416977	10	48416780	48416977	2	0	0	LUAD_hyper,LUSC_hyper
chr10:48438499-48439452	10	48438499	48439452	9	0	0	BRCA_hyper,COAD_hyper,ESCA_hyper,HNSC_hyper,LUAD_hyper,LUSC_hyper,PAAD_hyper,PRAD_hyper,UCEC_hyper
chr10:48861037-49460249	10	48861037	49460249	0	0	9	BLCA_hypoway,BRCA_hypoway,COAD_hypoway,ESCA_hypoway,HNSC_hypoway,LIHC_hypoway,LUAD_hypoway,LUSC_hypoway,UCEC_hypoway
chr10:49607581-49656920	10	49607581	49656920	0	0	1	BLCA_hypoway
chr10:49812866-49813371	10	49812866	49813371	2	0	0	BRCA_hyper,PAAD_hyper
chr10:49893335-49893463	10	49893335	49893463	0	3	0	BRCA_hypo,HNSC_hypo,LIHC_hypo
chr10:50010528-50123030	10	50010528	50123030	0	0	6	BLCA_hypoway,BRCA_hypoway,HNSC_hypoway,LIHC_hypoway,LUSC_hypoway,PRAD_hypoway
chr10:50264252-50321116	10	50264252	50321116	0	0	5	BLCA_hypoway,COAD_hypoway,LUSC_hypoway,PAAD_hypoway,PRAD_hypoway
chr10:50340172-50363896	10	50340172	50363896	0	0	9	BLCA_hypoway,BRCA_hypoway,COAD_hypoway,HNSC_hypoway,LIHC_hypoway,LUAD_hypoway,LUSC_hypoway,PRAD_hypoway,UCEC_hypoway
chr10:50386708-50450945	10	50386708	50450945	0	0	6	BLCA_hypoway,BRCA_hypoway,HNSC_hypoway,KIRC_hypoway,KIRP_hypoway,UCEC_hypoway
chr10:50512508-50600744	10	50512508	50600744	0	0	11	BLCA_hypoway,BRCA_hypoway,COAD_hypoway,ESCA_hypoway,HNSC_hypoway,LIHC_hypoway,LUAD_hypoway,LUSC_hypoway,PAAD_hypoway,PRAD_hypoway,UCEC_hypoway
chr10:50604329-50605707	10	50604329	50605707	10	0	0	BLCA_hyper,BRCA_hyper,COAD_hyper,ESCA_hyper,HNSC_hyper,LUAD_hyper,LUSC_hyper,PAAD_hyper,PRAD_hyper,UCEC_hyper
chr10:50821517-50822752	10	50821517	50822752	9	0	0	BRCA_hyper,COAD_hyper,ESCA_hyper,HNSC_hyper,LUAD_hyper,LUSC_hyper,PAAD_hyper,PRAD_hyper,UCEC_hyper
chr10:50887565-50887861	10	50887565	50887861	7	0	0	BRCA_hyper,COAD_hyper,HNSC_hyper,LUAD_hyper,LUSC_hyper,PAAD_hyper,PRAD_hyper
chr10:50969718-50970591	10	50969718	50970591	1	0	0	PAAD_hyper
chr10:50975939-50977288	10	50975939	50977288	10	0	0	BLCA_hyper,BRCA_hyper,COAD_hyper,ESCA_hyper,HNSC_hyper,LUAD_hyper,LUSC_hyper,PAAD_hyper,PRAD_hyper,UCEC_hyper
chr10:50979404-51487759	10	50979404	51487759	0	0	2	HNSC_hypoway,LIHC_hypoway
chr10:51575591-51576452	10	51575591	51576452	3	3	0	HNSC_hyper,KIRC_hypo,KIRP_hypo,LUAD_hyper,LUSC_hyper,UCEC_hypo
chr10:52431182-52487693	10	52431182	52487693	0	0	4	BLCA_hypoway,LIHC_hypoway,LUAD_hypoway,LUSC_hypoway
chr10:52750295-52751764	10	52750295	52751764	3	0	0	BRCA_hyper,HNSC_hyper,PRAD_hyper
chr10:52833443-52834676	10	52833443	52834676	2	0	0	LUAD_hyper,PRAD_hyper
chr10:52840376-53367157	10	52840376	53367157	1	0	7	BLCA_hypoway,HNSC_hypoway,KIRP_hyper,LIHC_hypoway,LUAD_hypoway,LUSC_hypoway,PRAD_hypoway,UCEC_hypoway
chr10:53575265-54054127	10	53575265	54054127	0	0	11	BLCA_hypoway,BRCA_hypoway,COAD_hypoway,ESCA_hypoway,HNSC_hypoway,LIHC_hypoway,LUAD_hypoway,LUSC_hypoway,PAAD_hypoway,PRAD_hypoway,UCEC_hypoway
chr10:54068371-54068630	10	54068371	54068630	4	0	0	BRCA_hyper,COAD_hyper,ESCA_hyper,HNSC_hyper
chr10:54073046-54073548	10	54073046	54073548	3	0	0	HNSC_hyper,LUSC_hyper,PRAD_hyper
chr10:54299631-54531653	10	54299631	54531653	0	0	8	BLCA_hypoway,BRCA_hypoway,COAD_hypoway,HNSC_hypoway,LUAD_hypoway,LUSC_hypoway,PRAD_hypoway,UCEC_hypoway
chr10:57387510-57388402	10	57387510	57388402	9	0	0	BLCA_hyper,BRCA_hyper,COAD_hyper,ESCA_hyper,HNSC_hyper,LUAD_hyper,LUSC_hyper,PAAD_hyper,UCEC_hyper
chr10:57389675-57391271	10	57389675	57391271	10	0	0	BLCA_hyper,BRCA_hyper,COAD_hyper,ESCA_hyper,HNSC_hyper,LUAD_hyper,LUSC_hyper,PAAD_hyper,PRAD_hyper,UCEC_hyper
chr10:60421396-60726142	10	60421396	60726142	0	0	9	BLCA_hypoway,BRCA_hypoway,COAD_hypoway,ESCA_hypoway,HNSC_hypoway,KIRC_hypoway,LIHC_hypoway,LUAD_hypoway,LUSC_hypoway
chr10:60936024-60937048	10	60936024	60937048	8	0	0	BLCA_hyper,BRCA_hyper,COAD_hyper,ESCA_hyper,HNSC_hyper,LUAD_hyper,LUSC_hyper,PAAD_hyper
chr10:60966071-61089785	10	60966071	61089785	0	0	3	COAD_hypoway,LUAD_hypoway,LUSC_hypoway
chr10:61901504-62135541	10	61901504	62135541	0	0	1	LIHC_hypoway
chr10:62757485-63211062	10	62757485	63211062	1	0	6	BLCA_hypoway,COAD_hypoway,HNSC_hypoway,KIRP_hyper,LIHC_hypoway,LUSC_hypoway,UCEC_hypoway
chr10:63212205-63212862	10	63212205	63212862	5	0	0	COAD_hyper,ESCA_hyper,HNSC_hyper,LUAD_hyper,PAAD_hyper
chr10:63422510-63423079	10	63422510	63423079	1	0	0	HNSC_hyper
chr10:64133794-64134403	10	64133794	64134403	1	0	0	COAD_hyper
chr10:64136037-64530590	10	64136037	64530590	0	0	9	BLCA_hypoway,BRCA_hypoway,COAD_hypoway,HNSC_hypoway,KIRC_hypoway,LIHC_hypoway,LUAD_hypoway,LUSC_hypoway,PRAD_hypoway
chr10:64578130-64579140	10	64578130	64579140	2	0	0	COAD_hyper,PAAD_hyper
chr10:64580359-64892741	10	64580359	64892741	0	0	8	BLCA_hypoway,COAD_hypoway,ESCA_hypoway,HNSC_hypoway,LIHC_hypoway,LUAD_hypoway,LUSC_hypoway,UCEC_hypoway
chr10:65732825-65771748	10	65732825	65771748	0	0	5	BLCA_hypoway,HNSC_hypoway,LIHC_hypoway,LUAD_hypoway,LUSC_hypoway
chr10:69146233-69521330	10	69146233	69521330	0	0	6	BLCA_hypoway,COAD_hypoway,HNSC_hypoway,KIRC_hypoway,LIHC_hypoway,LUSC_hypoway
chr10:69648298-69774146	10	69648298	69774146	0	0	1	LUSC_hypoway
chr10:70847349-70849854	10	70847349	70849854	4	0	0	BRCA_hyper,LUAD_hyper,LUSC_hyper,PRAD_hyper
chr10:70977209-70980112	10	70977209	70980112	1	3	0	COAD_hypo,LIHC_hypo,PRAD_hyper,UCEC_hypo
chr10:71077220-71079214	10	71077220	71079214	1	0	0	LIHC_hyper
chr10:71329399-71333037	10	71329399	71333037	10	0	0	BLCA_hyper,BRCA_hyper,COAD_hyper,ESCA_hyper,HNSC_hyper,LUAD_hyper,LUSC_hyper,PAAD_hyper,PRAD_hyper,UCEC_hyper
chr10:71337585-71338674	10	71337585	71338674	5	0	0	HNSC_hyper,LUAD_hyper,LUSC_hyper,PAAD_hyper,UCEC_hyper
chr10:71488988-71712830	10	71488988	71712830	0	0	8	BLCA_hypoway,COAD_hypoway,HNSC_hypoway,KIRC_hypoway,LIHC_hypoway,LUAD_hypoway,LUSC_hypoway,UCEC_hypoway
chr10:71812133-71813912	10	71812133	71813912	1	0	0	LUAD_hyper
chr10:71891927-71892787	10	71891927	71892787	1	0	0	PRAD_hyper
chr10:72240882-72363216	10	72240882	72363216	0	0	6	BLCA_hypoway,BRCA_hypoway,COAD_hypoway,HNSC_hypoway,KIRC_hypoway,LIHC_hypoway
chr10:72432460-72432573	10	72432460	72432573	2	0	0	COAD_hyper,PAAD_hyper
chr10:72476177-72574724	10	72476177	72574724	0	0	5	BLCA_hypoway,HNSC_hypoway,KIRC_hypoway,LIHC_hypoway,LUSC_hypoway
chr10:72677503-72937119	10	72677503	72937119	0	0	1	LIHC_hypoway
chr10:73156376-73158072	10	73156376	73158072	5	0	0	BRCA_hyper,COAD_hyper,LUAD_hyper,PAAD_hyper,PRAD_hyper
chr10:73160236-73312955	10	73160236	73312955	0	0	6	BLCA_hypoway,COAD_hypoway,HNSC_hypoway,LIHC_hypoway,LUSC_hypoway,UCEC_hypoway
chr10:73425439-73466728	10	73425439	73466728	0	0	5	COAD_hypoway,HNSC_hypoway,LIHC_hypoway,LUAD_hypoway,LUSC_hypoway
chr10:73479513-73480942	10	73479513	73480942	0	5	0	BLCA_hypo,HNSC_hypo,LIHC_hypo,LUAD_hypo,LUSC_hypo
chr10:74017121-74023752	10	74017121	74023752	1	1	0	BLCA_hypo,PRAD_hyper
chr10:75407371-75407991	10	75407371	75407991	7	0	0	BRCA_hyper,ESCA_hyper,HNSC_hyper,LIHC_hyper,LUAD_hyper,PRAD_hyper,UCEC_hyper
chr10:75410776-75458056	10	75410776	75458056	0	0	2	COAD_hypoway,LIHC_hypoway
chr10:77155142-77157423	10	77155142	77157423	3	0	0	BLCA_hyper,LUSC_hyper,PRAD_hyper
chr10:77165617-77167091	10	77165617	77167091	6	1	0	BRCA_hyper,ESCA_hyper,HNSC_hyper,KIRC_hyper,KIRP_hyper,LUSC_hyper,UCEC_hypo
chr10:77352230-77472158	10	77352230	77472158	2	0	1	LUAD_hyper,LUSC_hyper,UCEC_hypoway
chr10:77871617-77872458	10	77871617	77872458	5	0	0	COAD_hyper,HNSC_hyper,KIRC_hyper,KIRP_hyper,PRAD_hyper
chr10:78540715-78798272	10	78540715	78798272	0	0	7	BLCA_hypoway,COAD_hypoway,ESCA_hypoway,HNSC_hypoway,LIHC_hypoway,LUAD_hypoway,LUSC_hypoway
chr10:78864252-78959465	10	78864252	78959465	0	0	7	BLCA_hypoway,COAD_hypoway,ESCA_hypoway,HNSC_hypoway,LIHC_hypoway,LUAD_hypoway,LUSC_hypoway
chr10:79074255-79133935	10	79074255	79133935	0	0	7	BLCA_hypoway,ESCA_hypoway,LIHC_hypoway,LUAD_hypoway,LUSC_hypoway,PAAD_hypoway,UCEC_hypoway
chr10:79273864-79363895	10	79273864	79363895	0	0	5	BLCA_hypoway,COAD_hypoway,LIHC_hypoway,LUAD_hypoway,LUSC_hypoway
chr10:79395901-79397075	10	79395901	79397075	4	0	0	BLCA_hyper,LUAD_hyper,PRAD_hyper,UCEC_hyper
chr10:79931577-80052820	10	79931577	80052820	0	0	10	BLCA_hypoway,COAD_hypoway,ESCA_hypoway,HNSC_hypoway,KIRC_hypoway,LIHC_hypoway,LUAD_hypoway,LUSC_hypoway,PAAD_hypoway,UCEC_hypoway
chr10:80195601-80275252	10	80195601	80275252	3	0	1	HNSC_hypoway,KIRP_hyper,PRAD_hyper,UCEC_hyper
chr10:80327889-80394069	10	80327889	80394069	0	0	6	BLCA_hypoway,ESCA_hypoway,HNSC_hypoway,LIHC_hypoway,LUSC_hypoway,UCEC_hypoway
chr10:80588620-80635973	10	80588620	80635973	0	0	3	HNSC_hypoway,LUSC_hypoway,UCEC_hypoway
chr10:80963127-80999841	10	80963127	80999841	9	0	0	BRCA_hyper,COAD_hyper,HNSC_hyper,KIRC_hyper,KIRP_hyper,LUAD_hyper,PAAD_hyper,PRAD_hyper,UCEC_hyper
chr10:81271275-81374572	10	81271275	81374572	0	0	7	BLCA_hypoway,BRCA_hypoway,COAD_hypoway,HNSC_hypoway,LIHC_hypoway,PAAD_hypoway,UCEC_hypoway
chr10:81664322-81667960	10	81664322	81667960	1	0	0	COAD_hyper
chr10:82116364-82116571	10	82116364	82116571	5	0	0	COAD_hyper,LUAD_hyper,LUSC_hyper,PAAD_hyper,PRAD_hyper
chr10:82295393-82296191	10	82295393	82296191	0	1	0	UCEC_hypo
chr10:82299605-83630419	10	82299605	83630419	0	0	7	BLCA_hypoway,COAD_hypoway,HNSC_hypoway,LIHC_hypoway,LUAD_hypoway,LUSC_hypoway,UCEC_hypoway
chr10:83633979-83636325	10	83633979	83636325	7	0	0	COAD_hyper,ESCA_hyper,HNSC_hyper,LUAD_hyper,LUSC_hyper,PRAD_hyper,UCEC_hyper
chr10:83639689-84228439	10	83639689	84228439	0	0	10	BLCA_hypoway,BRCA_hypoway,COAD_hypoway,ESCA_hypoway,HNSC_hypoway,LIHC_hypoway,LUAD_hypoway,LUSC_hypoway,PRAD_hypoway,UCEC_hypoway
chr10:85577906-85684424	10	85577906	85684424	0	0	9	BLCA_hypoway,COAD_hypoway,HNSC_hypoway,KIRC_hypoway,KIRP_hypoway,LIHC_hypoway,LUAD_hypoway,LUSC_hypoway,UCEC_hypoway
chr10:85954311-85955302	10	85954311	85955302	1	0	0	PAAD_hyper
chr10:85985221-85991526	10	85985221	85991526	0	9	0	BLCA_hypo,COAD_hypo,ESCA_hypo,HNSC_hypo,LIHC_hypo,LUAD_hypo,LUSC_hypo,PRAD_hypo,UCEC_hypo
chr10:86001153-86003563	10	86001153	86003563	0	8	0	BLCA_hypo,BRCA_hypo,HNSC_hypo,LIHC_hypo,LUAD_hypo,LUSC_hypo,PAAD_hypo,PRAD_hypo
chr10:86372857-86963121	10	86372857	86963121	0	0	2	COAD_hypoway,UCEC_hypoway
chr10:87291811-87909211	10	87291811	87909211	0	0	11	BLCA_hypoway,BRCA_hypoway,COAD_hypoway,HNSC_hypoway,KIRC_hypoway,LIHC_hypoway,LUAD_hypoway,LUSC_hypoway,PAAD_hypoway,PRAD_hypoway,UCEC_hypoway
chr10:88123168-88127363	10	88123168	88127363	2	0	0	COAD_hyper,HNSC_hyper
chr10:88414234-88425627	10	88414234	88425627	0	0	4	BLCA_hypoway,HNSC_hypoway,LIHC_hypoway,LUSC_hypoway
chr10:88715316-88717926	10	88715316	88717926	5	1	0	BRCA_hyper,KIRC_hypo,KIRP_hyper,LUAD_hyper,LUSC_hyper,PRAD_hyper
chr10:89504154-89574331	10	89504154	89574331	0	0	2	LIHC_hypoway,LUSC_hypoway
chr10:90343434-90488032	10	90343434	90488032	0	0	4	BLCA_hypoway,HNSC_hypoway,LIHC_hypoway,LUSC_hypoway
chr10:90695562-90739926	10	90695562	90739926	4	0	1	BLCA_hyper,BRCA_hyper,KIRP_hyper,PAAD_hypoway,UCEC_hyper
chr10:90967611-90968091	10	90967611	90968091	2	0	0	BRCA_hyper,PAAD_hyper
chr10:91295044-91295650	10	91295044	91295650	5	0	0	BRCA_hyper,COAD_hyper,LUAD_hyper,PAAD_hyper,PRAD_hyper
chr10:91605651-92395206	10	91605651	92395206	0	0	8	BLCA_hypoway,COAD_hypoway,HNSC_hypoway,KIRC_hypoway,LIHC_hypoway,LUAD_hypoway,LUSC_hypoway,UCEC_hypoway
chr10:92616758-92618141	10	92616758	92618141	3	0	0	BRCA_hyper,COAD_hyper,PAAD_hyper
chr10:92912528-92916289	10	92912528	92916289	0	9	0	BLCA_hypo,BRCA_hypo,COAD_hypo,ESCA_hypo,HNSC_hypo,LIHC_hypo,LUAD_hypo,LUSC_hypo,UCEC_hypo
chr10:93392398-93393509	10	93392398	93393509	2	0	0	COAD_hyper,LUSC_hyper
chr10:93646990-93647648	10	93646990	93647648	3	0	0	BRCA_hyper,LIHC_hyper,PRAD_hyper
chr10:94179808-94180753	10	94179808	94180753	8	0	0	COAD_hyper,ESCA_hyper,HNSC_hyper,LUAD_hyper,LUSC_hyper,PAAD_hyper,PRAD_hyper,UCEC_hyper
chr10:94450993-94452554	10	94450993	94452554	5	0	0	BLCA_hyper,COAD_hyper,LUAD_hyper,LUSC_hyper,UCEC_hyper
chr10:94819558-94829090	10	94819558	94829090	12	0	0	BLCA_hyper,BRCA_hyper,COAD_hyper,ESCA_hyper,HNSC_hyper,KIRC_hyper,LIHC_hyper,LUAD_hyper,LUSC_hyper,PAAD_hyper,PRAD_hyper,UCEC_hyper
chr10:94834200-94835255	10	94834200	94835255	8	0	0	BRCA_hyper,COAD_hyper,ESCA_hyper,HNSC_hyper,LIHC_hyper,LUAD_hyper,LUSC_hyper,PAAD_hyper
chr10:95326032-95327884	10	95326032	95327884	5	1	0	BRCA_hyper,COAD_hypo,HNSC_hyper,LUAD_hyper,LUSC_hyper,UCEC_hyper
chr10:95360493-95361342	10	95360493	95361342	2	0	0	LUAD_hyper,LUSC_hyper
chr10:96443382-96798865	10	96443382	96798865	1	0	7	BLCA_hypoway,ESCA_hypoway,HNSC_hypoway,LIHC_hyper,LUAD_hypoway,LUSC_hypoway,PRAD_hypoway,UCEC_hypoway
chr10:96988477-97026430	10	96988477	97026430	1	0	0	UCEC_hyper
chr10:97169146-97182445	10	97169146	97182445	2	0	0	BRCA_hyper,PRAD_hyper
chr10:97514119-97633052	10	97514119	97633052	0	0	6	COAD_hypoway,ESCA_hypoway,HNSC_hypoway,KIRC_hypoway,LIHC_hypoway,LUSC_hypoway
chr10:97686633-97792309	10	97686633	97792309	0	0	7	BLCA_hypoway,COAD_hypoway,ESCA_hypoway,HNSC_hypoway,LUAD_hypoway,LUSC_hypoway,UCEC_hypoway
chr10:97802848-97804280	10	97802848	97804280	1	0	0	LIHC_hyper
chr10:98031124-98031964	10	98031124	98031964	0	5	0	BLCA_hypo,BRCA_hypo,LUAD_hypo,LUSC_hypo,UCEC_hypo
chr10:98792052-98862384	10	98792052	98862384	0	0	8	BLCA_hypoway,BRCA_hypoway,COAD_hypoway,HNSC_hypoway,LIHC_hypoway,LUAD_hypoway,LUSC_hypoway,UCEC_hypoway
chr10:98945024-98945949	10	98945024	98945949	2	0	0	COAD_hyper,PAAD_hyper
chr10:99329960-99330447	10	99329960	99330447	1	0	0	HNSC_hyper
chr10:99531037-99531934	10	99531037	99531934	5	0	0	BRCA_hyper,COAD_hyper,KIRP_hyper,LUAD_hyper,PRAD_hyper
chr10:99695980-99786488	10	99695980	99786488	0	0	10	BLCA_hypoway,BRCA_hypoway,COAD_hypoway,ESCA_hypoway,HNSC_hypoway,KIRC_hypoway,LIHC_hypoway,LUAD_hypoway,LUSC_hypoway,UCEC_hypoway
chr10:99789576-99790910	10	99789576	99790910	4	0	0	BRCA_hyper,COAD_hyper,LUAD_hyper,PAAD_hyper
chr10:100992221-100993662	10	100992221	100993662	9	0	0	BLCA_hyper,BRCA_hyper,COAD_hyper,ESCA_hyper,HNSC_hyper,LUAD_hyper,LUSC_hyper,PRAD_hyper,UCEC_hyper
chr10:101088810-101090558	10	101088810	101090558	2	0	0	BRCA_hyper,COAD_hyper
chr10:101282571-101283847	10	101282571	101283847	8	0	0	BRCA_hyper,ESCA_hyper,HNSC_hyper,KIRP_hyper,LUAD_hyper,LUSC_hyper,PAAD_hyper,PRAD_hyper
chr10:101287058-101287846	10	101287058	101287846	5	0	0	ESCA_hyper,HNSC_hyper,LUAD_hyper,PAAD_hyper,PRAD_hyper
chr10:101290028-101291272	10	101290028	101291272	10	0	0	BLCA_hyper,BRCA_hyper,COAD_hyper,ESCA_hyper,HNSC_hyper,LUAD_hyper,LUSC_hyper,PAAD_hyper,PRAD_hyper,UCEC_hyper
chr10:101295723-101297642	10	101295723	101297642	9	0	0	BRCA_hyper,COAD_hyper,ESCA_hyper,HNSC_hyper,LUAD_hyper,LUSC_hyper,PAAD_hyper,PRAD_hyper,UCEC_hyper
chr10:102046767-102101046	10	102046767	102101046	1	0	5	COAD_hypoway,HNSC_hypoway,KIRP_hyper,LIHC_hypoway,LUAD_hypoway,LUSC_hypoway
chr10:102278917-102279758	10	102278917	102279758	9	0	0	BLCA_hyper,BRCA_hyper,COAD_hyper,ESCA_hyper,HNSC_hyper,LUAD_hyper,LUSC_hyper,PAAD_hyper,PRAD_hyper
chr10:102419208-102419617	10	102419208	102419617	9	0	0	BLCA_hyper,BRCA_hyper,COAD_hyper,ESCA_hyper,HNSC_hyper,LUAD_hyper,LUSC_hyper,PAAD_hyper,PRAD_hyper
chr10:102440701-102447466	10	102440701	102447466	2	0	0	LUAD_hyper,PAAD_hyper
chr10:102473021-102475896	10	102473021	102475896	8	0	0	BRCA_hyper,COAD_hyper,ESCA_hyper,HNSC_hyper,LUAD_hyper,LUSC_hyper,PAAD_hyper,PRAD_hyper
chr10:102483842-102484499	10	102483842	102484499	6	0	0	BRCA_hyper,COAD_hyper,HNSC_hyper,LUAD_hyper,LUSC_hyper,PRAD_hyper
chr10:102497297-102498419	10	102497297	102498419	8	0	0	BRCA_hyper,COAD_hyper,ESCA_hyper,HNSC_hyper,LUAD_hyper,LUSC_hyper,PAAD_hyper,PRAD_hyper
chr10:102501345-102504297	10	102501345	102504297	9	0	0	BRCA_hyper,COAD_hyper,ESCA_hyper,HNSC_hyper,LUAD_hyper,LUSC_hyper,PAAD_hyper,PRAD_hyper,UCEC_hyper
chr10:102507683-102510568	10	102507683	102510568	8	0	0	BRCA_hyper,COAD_hyper,ESCA_hyper,HNSC_hyper,LUAD_hyper,LUSC_hyper,PAAD_hyper,PRAD_hyper
chr10:102589466-102590401	10	102589466	102590401	9	0	0	BLCA_hyper,BRCA_hyper,COAD_hyper,ESCA_hyper,HNSC_hyper,LUAD_hyper,LUSC_hyper,PRAD_hyper,UCEC_hyper
chr10:102731538-102734271	10	102731538	102734271	0	3	0	HNSC_hypo,KIRC_hypo,LUSC_hypo
chr10:102748540-102749544	10	102748540	102749544	0	1	0	PRAD_hypo
chr10:102821426-102822201	10	102821426	102822201	0	3	0	COAD_hypo,PAAD_hypo,UCEC_hypo
chr10:102892527-102900491	10	102892527	102900491	12	0	0	BLCA_hyper,BRCA_hyper,COAD_hyper,ESCA_hyper,HNSC_hyper,KIRC_hyper,LIHC_hyper,LUAD_hyper,LUSC_hyper,PAAD_hyper,PRAD_hyper,UCEC_hyper
chr10:102976701-102978443	10	102976701	102978443	7	0	0	BRCA_hyper,COAD_hyper,ESCA_hyper,HNSC_hyper,LUAD_hyper,LUSC_hyper,PAAD_hyper
chr10:102982331-102985949	10	102982331	102985949	9	0	0	BLCA_hyper,BRCA_hyper,COAD_hyper,ESCA_hyper,HNSC_hyper,LUAD_hyper,LUSC_hyper,PAAD_hyper,PRAD_hyper
chr10:102996797-102998762	10	102996797	102998762	9	0	0	BLCA_hyper,BRCA_hyper,COAD_hyper,ESCA_hyper,HNSC_hyper,LUAD_hyper,LUSC_hyper,PRAD_hyper,UCEC_hyper
chr10:103043990-103044950	10	103043990	103044950	8	0	0	BLCA_hyper,BRCA_hyper,COAD_hyper,ESCA_hyper,HNSC_hyper,LUAD_hyper,LUSC_hyper,PRAD_hyper
chr10:103455164-103530255	10	103455164	103530255	0	0	1	LIHC_hypoway
chr10:103534500-103536342	10	103534500	103536342	8	0	0	COAD_hyper,ESCA_hyper,HNSC_hyper,KIRC_hyper,KIRP_hyper,LUAD_hyper,LUSC_hyper,PRAD_hyper
chr10:103588817-103589988	10	103588817	103589988	4	0	0	HNSC_hyper,KIRC_hyper,KIRP_hyper,PRAD_hyper
chr10:103603291-103604222	10	103603291	103604222	3	1	0	BLCA_hyper,COAD_hyper,LUSC_hypo,PAAD_hyper
chr10:103880675-103881480	10	103880675	103881480	6	0	0	COAD_hyper,KIRP_hyper,LUAD_hyper,LUSC_hyper,PRAD_hyper,UCEC_hyper
chr10:104000445-104001474	10	104000445	104001474	4	0	0	BRCA_hyper,COAD_hyper,KIRC_hyper,LUAD_hyper
chr10:104535520-104536695	10	104535520	104536695	7	0	0	BLCA_hyper,ESCA_hyper,HNSC_hyper,KIRC_hyper,LUAD_hyper,LUSC_hyper,UCEC_hyper
chr10:105036610-105037796	10	105036610	105037796	8	0	0	BRCA_hyper,COAD_hyper,HNSC_hyper,LIHC_hyper,LUAD_hyper,LUSC_hyper,PAAD_hyper,PRAD_hyper
chr10:105213817-105230660	10	105213817	105230660	0	0	7	BLCA_hypoway,COAD_hypoway,HNSC_hypoway,LIHC_hypoway,LUAD_hypoway,LUSC_hypoway,UCEC_hypoway
chr10:105238872-105239205	10	105238872	105239205	1	6	0	BLCA_hypo,BRCA_hypo,LIHC_hypo,LUSC_hypo,PAAD_hypo,PRAD_hyper,UCEC_hypo
chr10:105791155-105846908	10	105791155	105846908	1	0	5	ESCA_hypoway,LIHC_hypoway,LUAD_hypoway,LUSC_hypoway,PRAD_hyper,UCEC_hypoway
chr10:106176904-106396576	10	106176904	106396576	0	0	7	BLCA_hypoway,COAD_hypoway,HNSC_hypoway,LIHC_hypoway,LUAD_hypoway,LUSC_hypoway,UCEC_hypoway
chr10:106399512-106402908	10	106399512	106402908	10	0	0	BLCA_hyper,BRCA_hyper,COAD_hyper,ESCA_hyper,HNSC_hyper,LUAD_hyper,LUSC_hyper,PAAD_hyper,PRAD_hyper,UCEC_hyper
chr10:106468735-107899066	10	106468735	107899066	0	0	11	BLCA_hypoway,BRCA_hypoway,COAD_hypoway,ESCA_hypoway,HNSC_hypoway,LIHC_hypoway,LUAD_hypoway,LUSC_hypoway,PAAD_hypoway,PRAD_hypoway,UCEC_hypoway
chr10:108923780-108924867	10	108923780	108924867	9	0	0	BLCA_hyper,COAD_hyper,ESCA_hyper,HNSC_hyper,LUAD_hyper,LUSC_hyper,PAAD_hyper,PRAD_hyper,UCEC_hyper
chr10:109023549-109671761	10	109023549	109671761	0	0	4	BLCA_hypoway,HNSC_hypoway,LUAD_hypoway,LUSC_hypoway
chr10:109674296-109675284	10	109674296	109675284	8	0	0	BRCA_hyper,COAD_hyper,ESCA_hyper,LUAD_hyper,LUSC_hyper,PAAD_hyper,PRAD_hyper,UCEC_hyper
chr10:110282009-110668321	10	110282009	110668321	0	0	8	BLCA_hypoway,BRCA_hypoway,COAD_hypoway,ESCA_hypoway,LIHC_hypoway,LUSC_hypoway,PRAD_hypoway,UCEC_hypoway
chr10:110741627-111213963	10	110741627	111213963	0	0	11	BLCA_hypoway,BRCA_hypoway,COAD_hypoway,ESCA_hypoway,HNSC_hypoway,KIRC_hypoway,LIHC_hypoway,LUAD_hypoway,LUSC_hypoway,PRAD_hypoway,UCEC_hypoway
[truncated: 7,086 more rows]

## Sheet: Supplementary Data 7
Supplementary Data 7: Fraction of DMRs in different genomic features across 13 TCGA datasets
[truncated: 27 more rows]

[truncated: 4 more sheets: Supplementary Data 8, Supplementary Data 9, Supplementary Data 10, Supplementary Data 11]
